# Supplementary material for: Characterization of Bulk Phosphatidylcholine Compositions in Human Plasma Using Side-Chain Resolving Lipidomics
Source: MDPI journal article supplement (doi:10.3390/metabo9060109), 2019-06-08

# PC aa C30:0

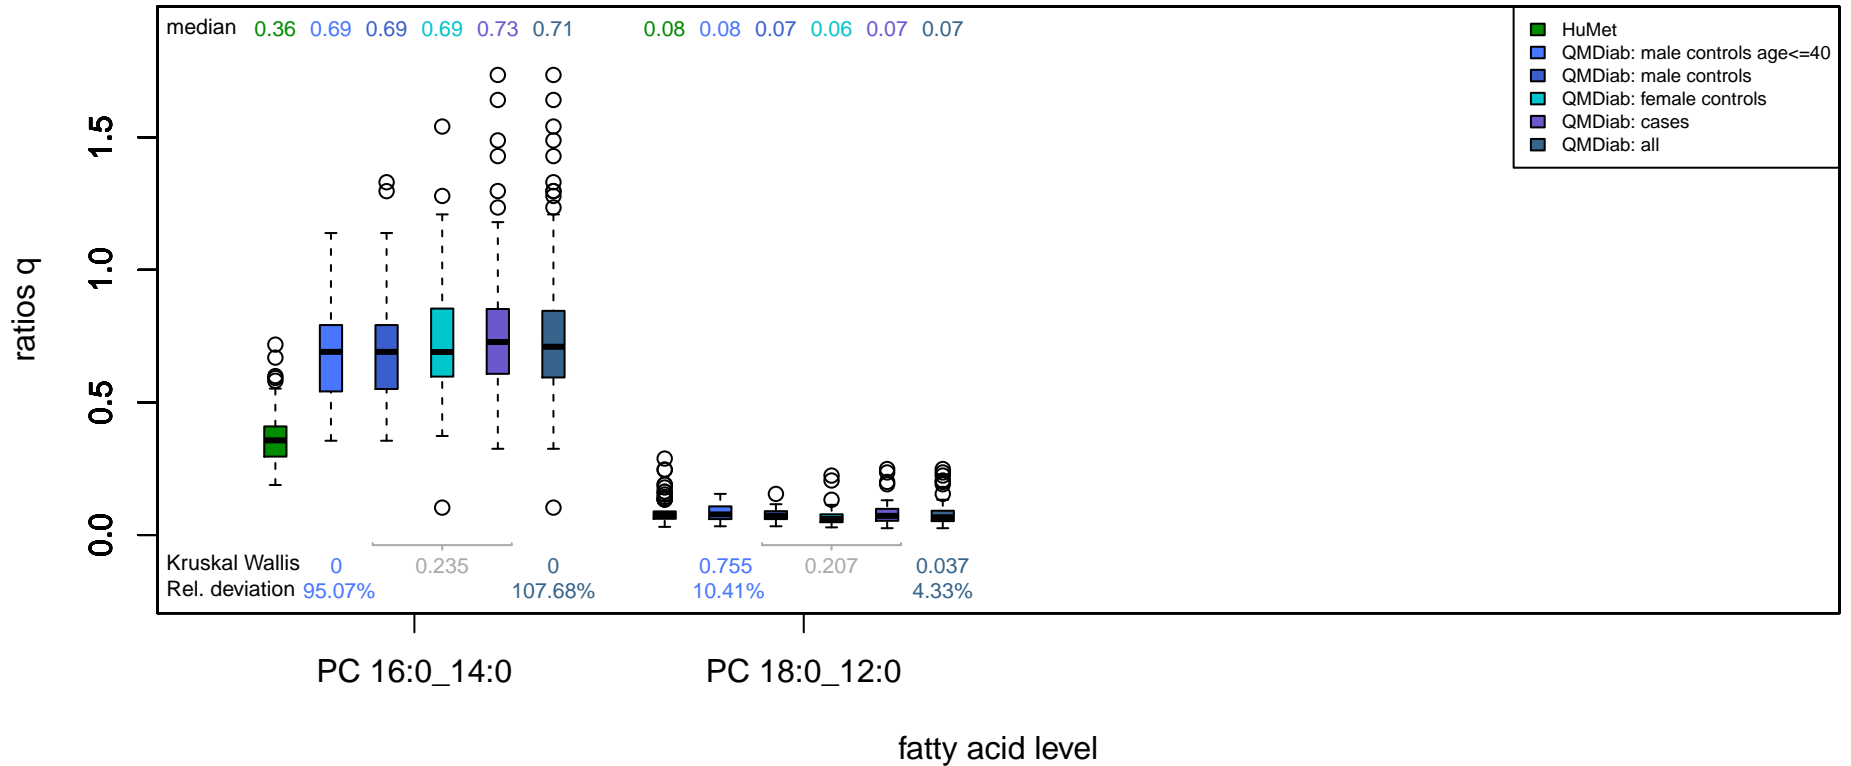

# PC aa C32:0

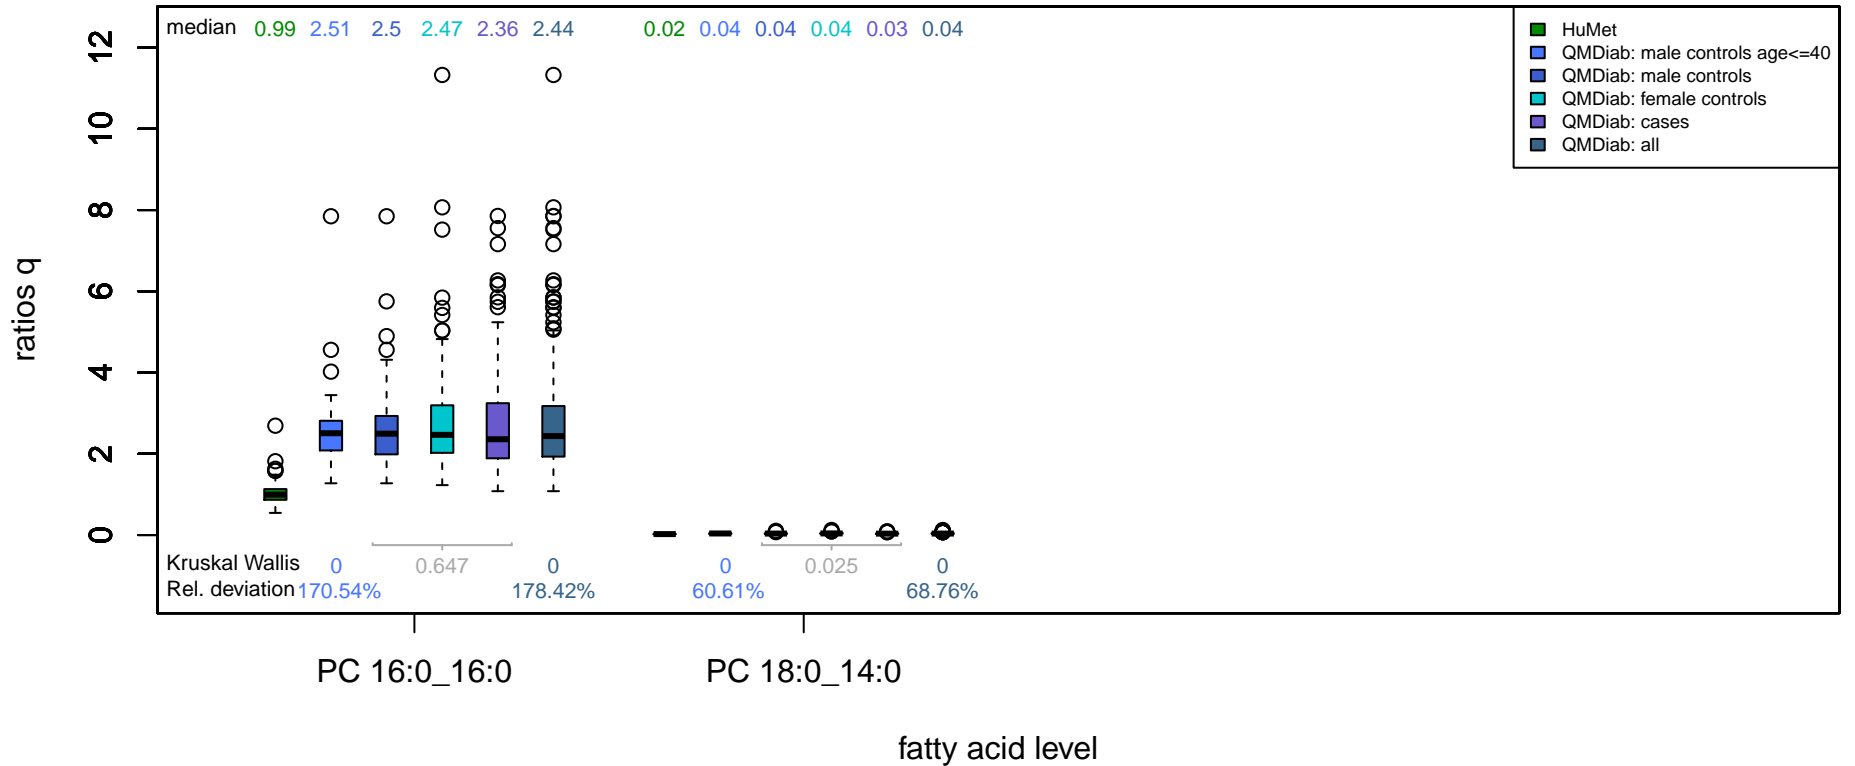

# PC aa C32:1

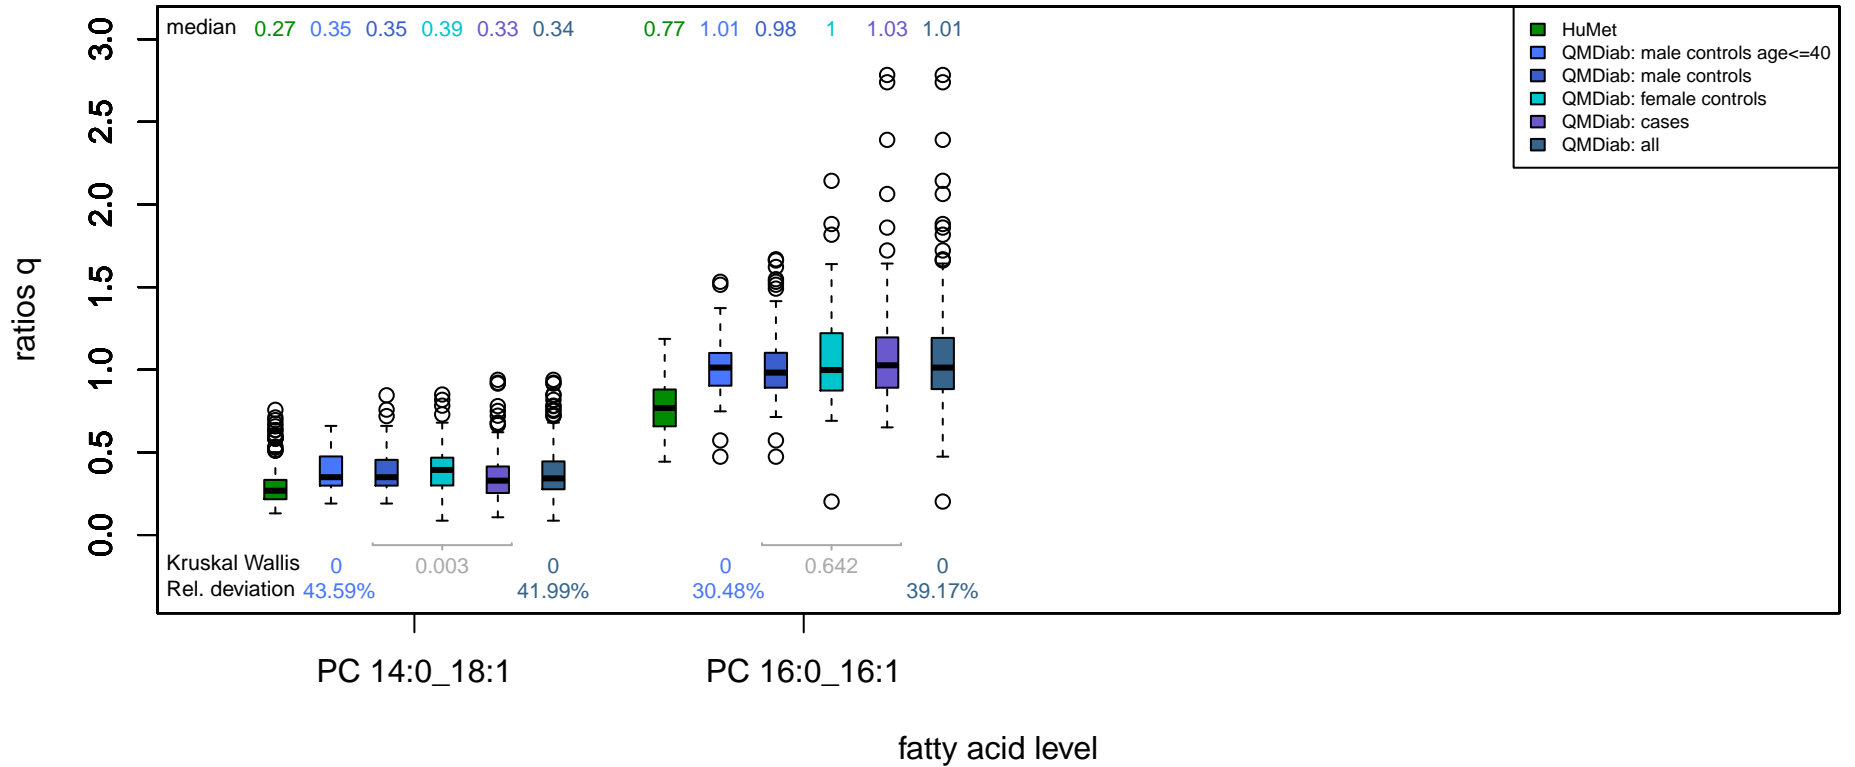

# PC aa C32:2

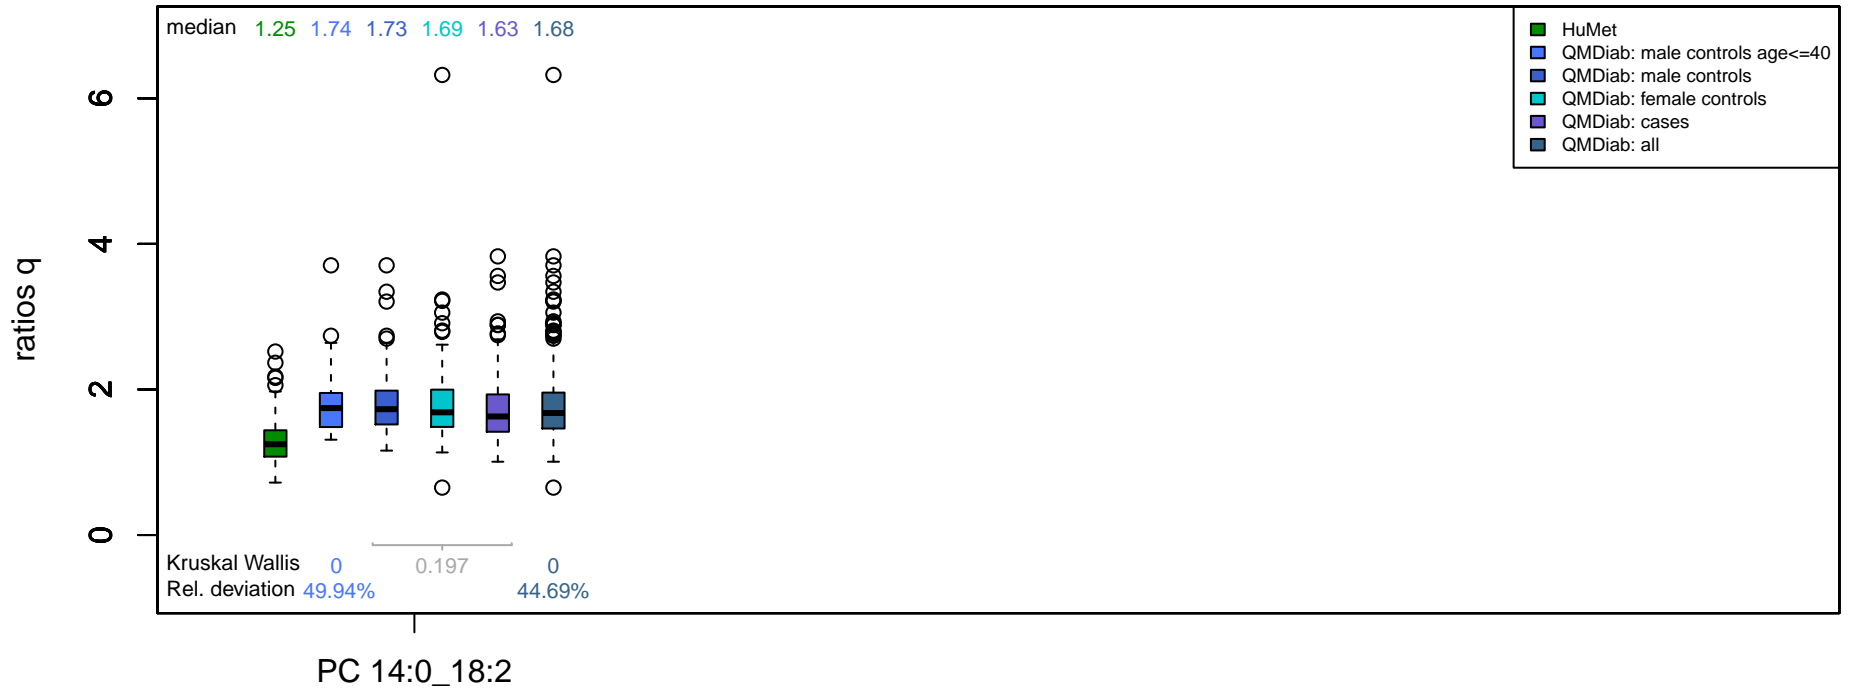

# PC aa C34:1

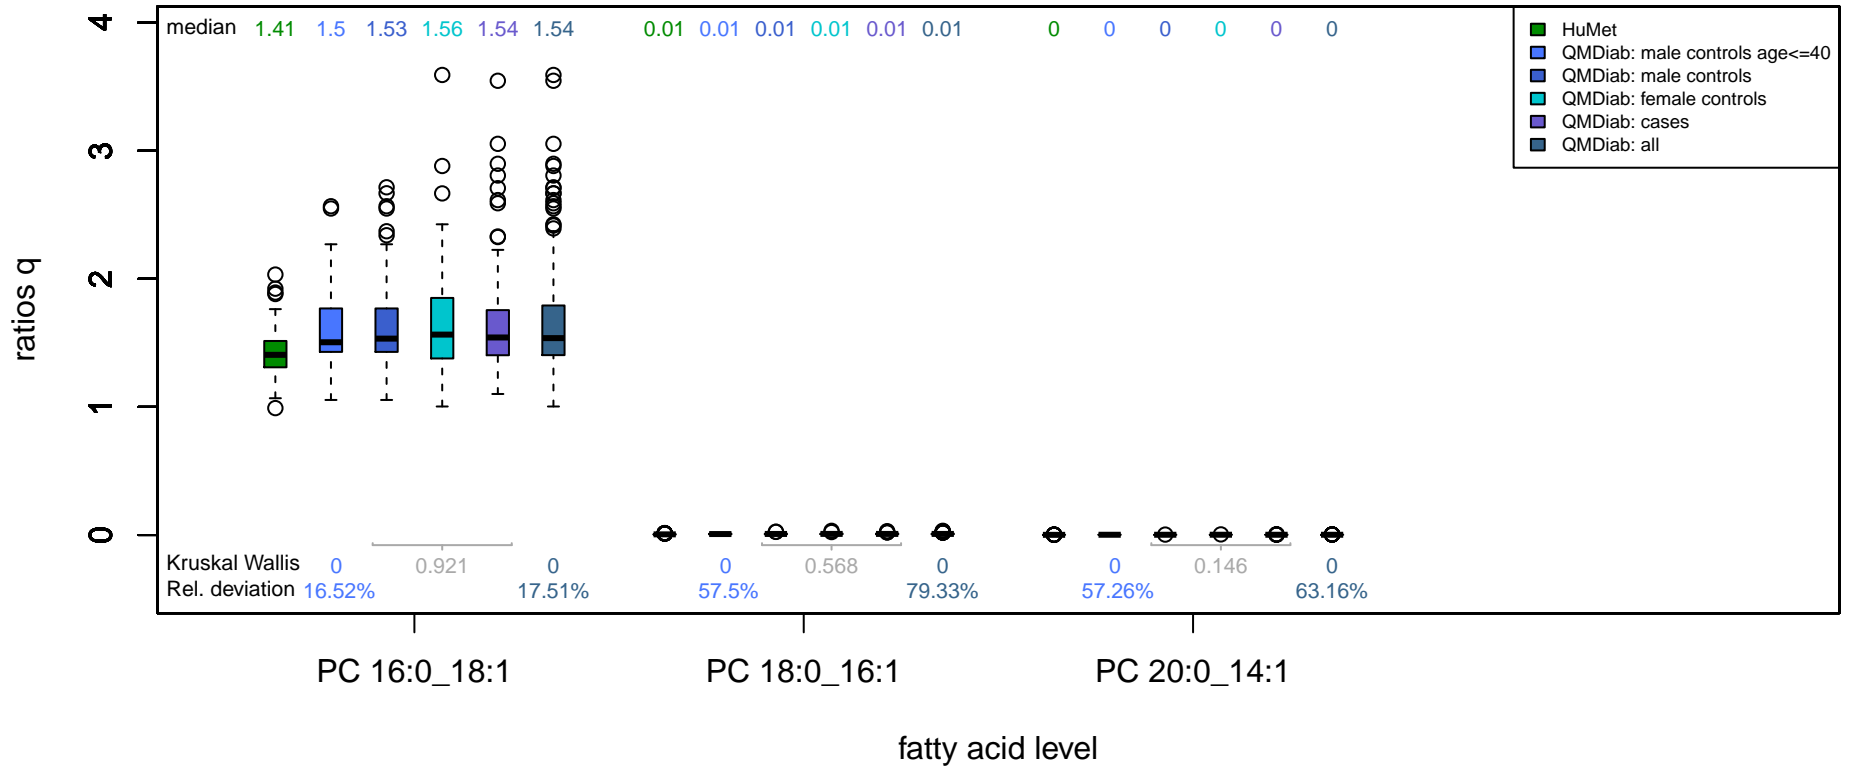

# PC aa C34:2

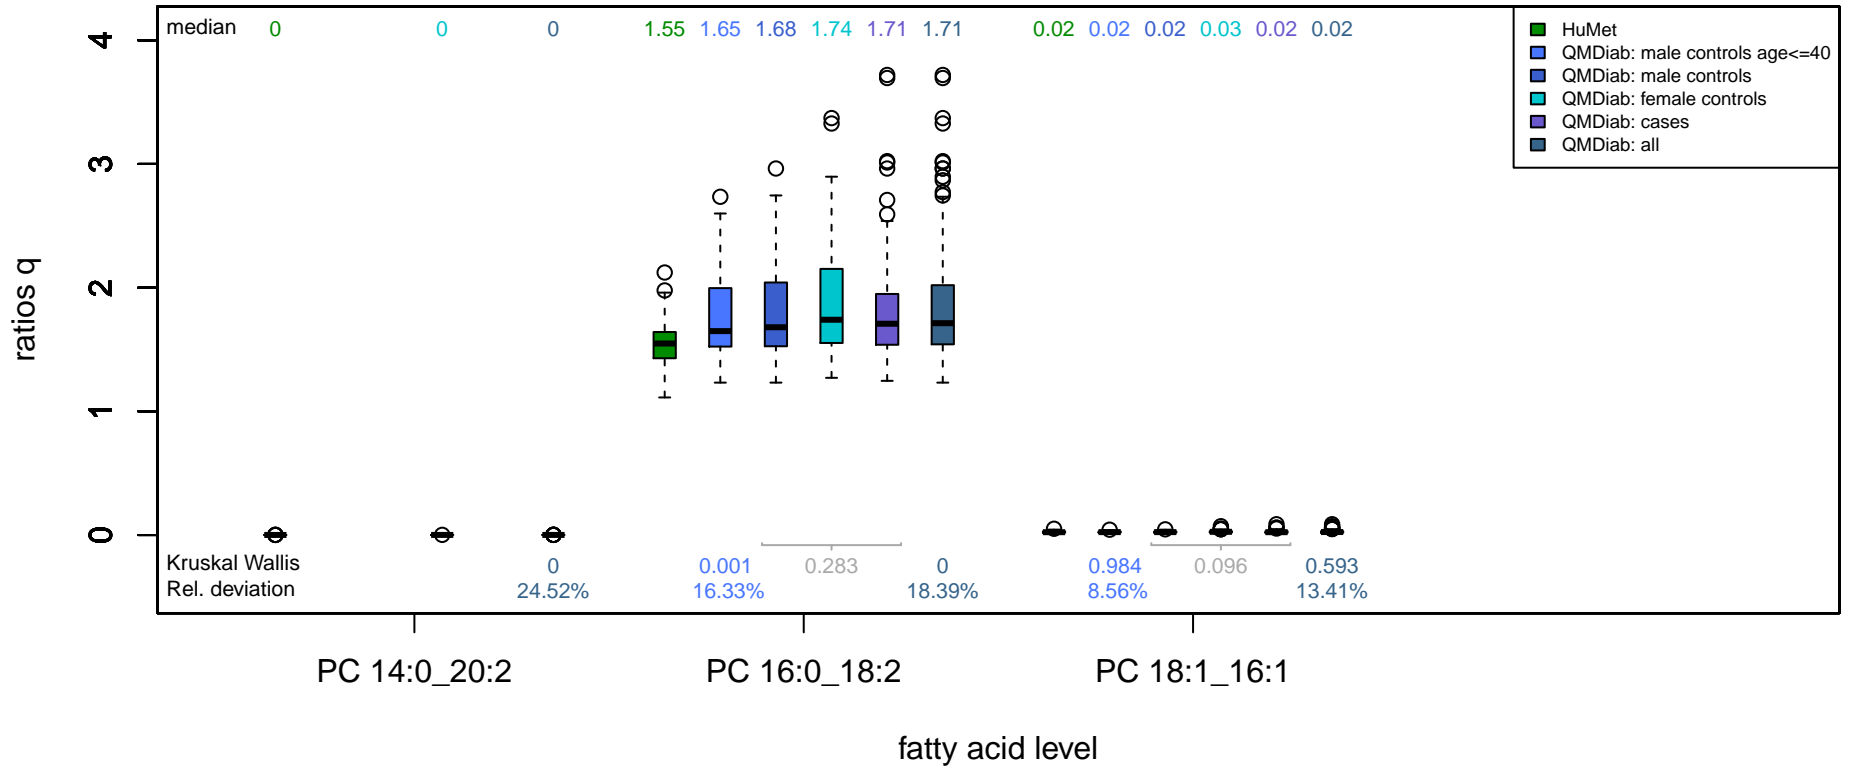

# PC aa C34:3

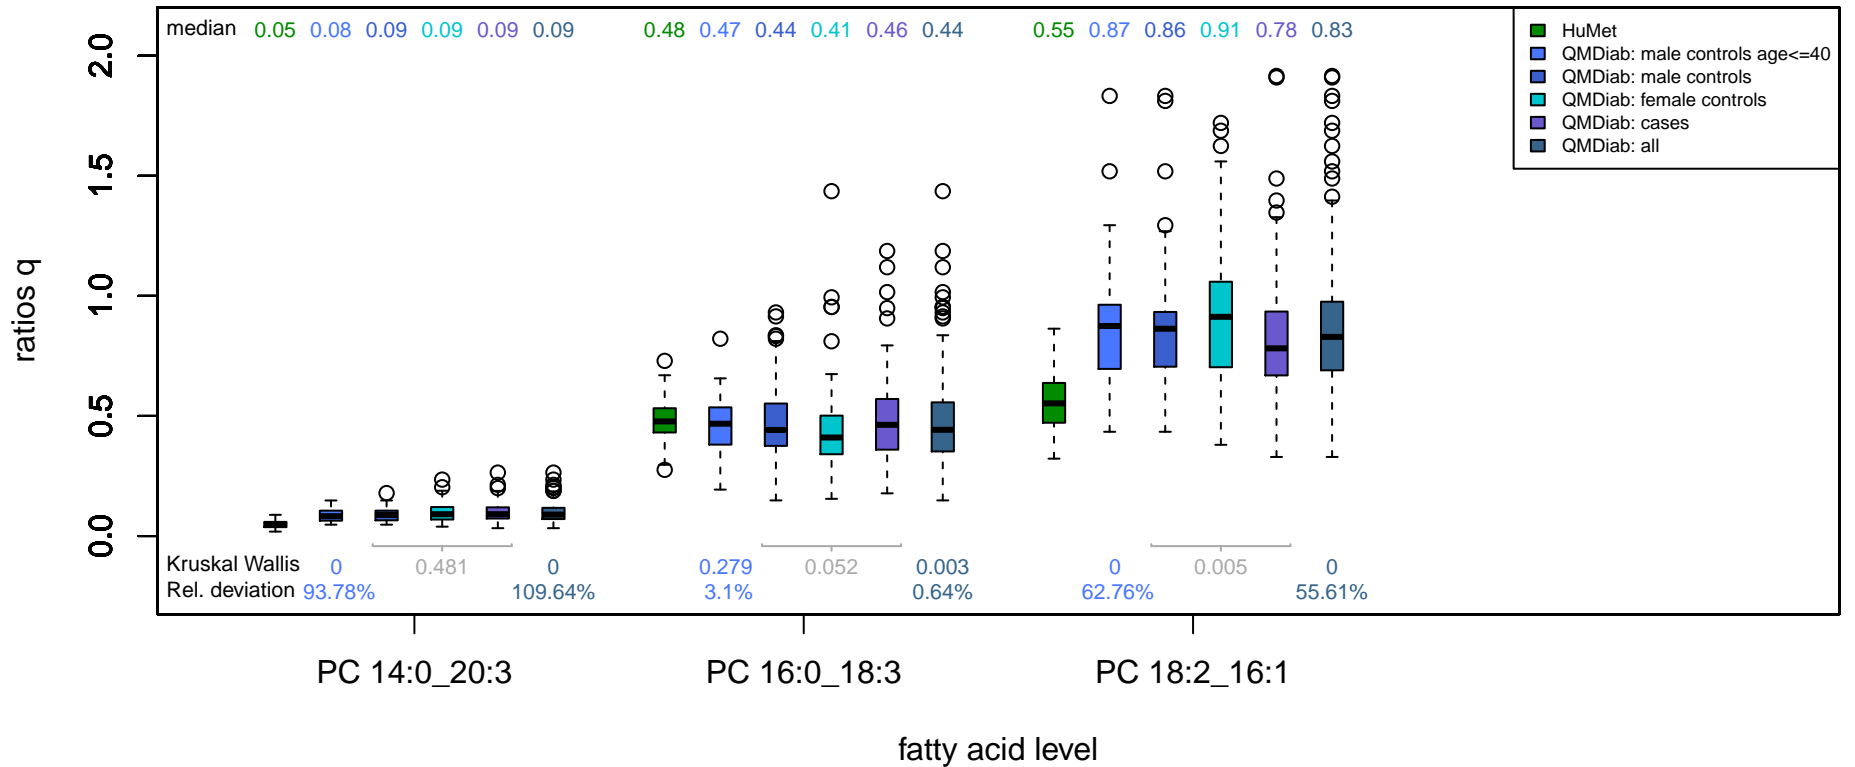

# PC aa C34:4

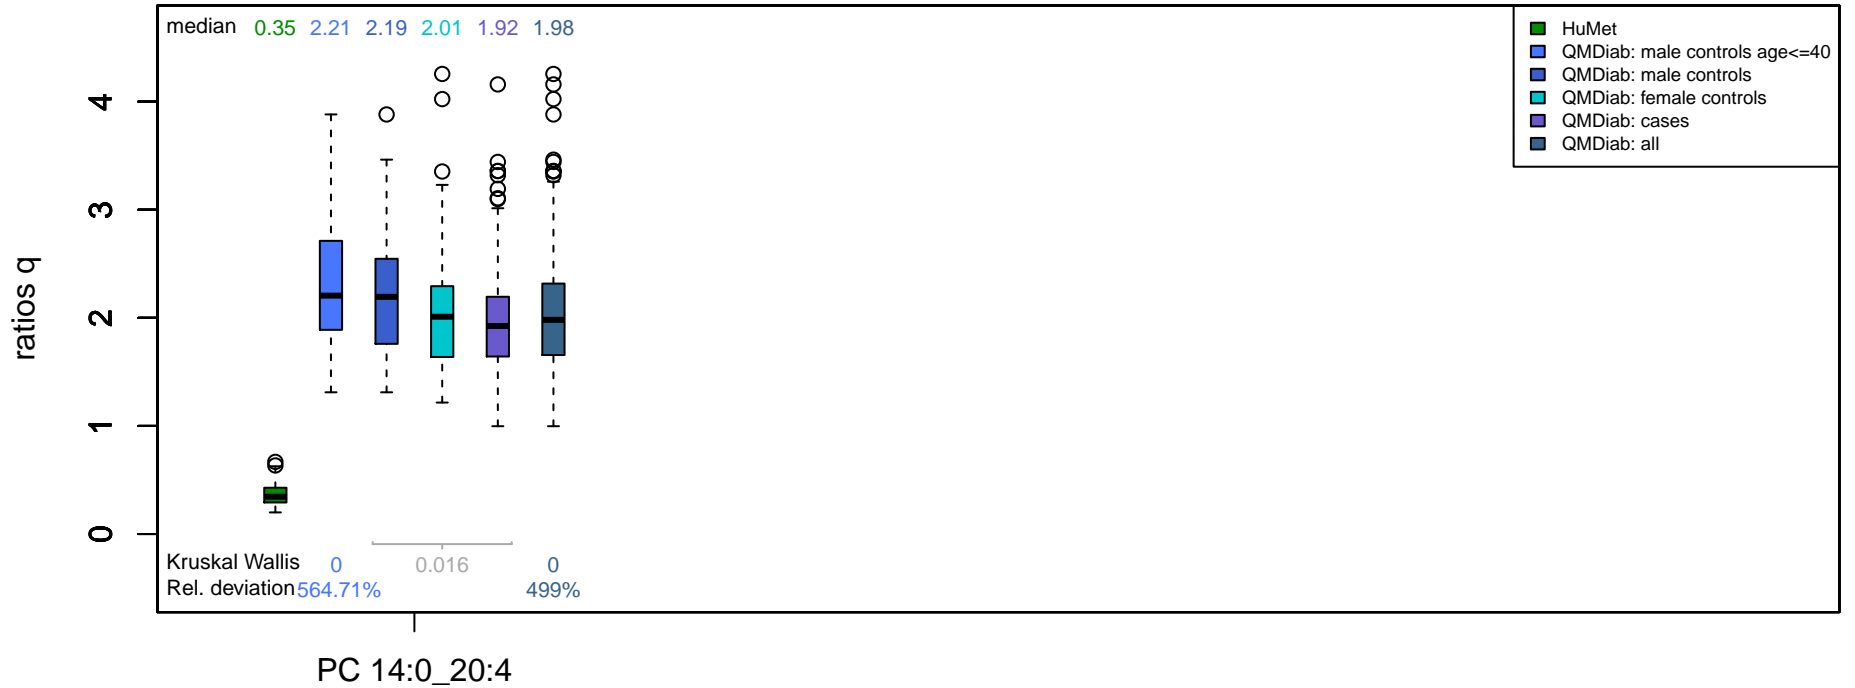



# PC aa C36:0

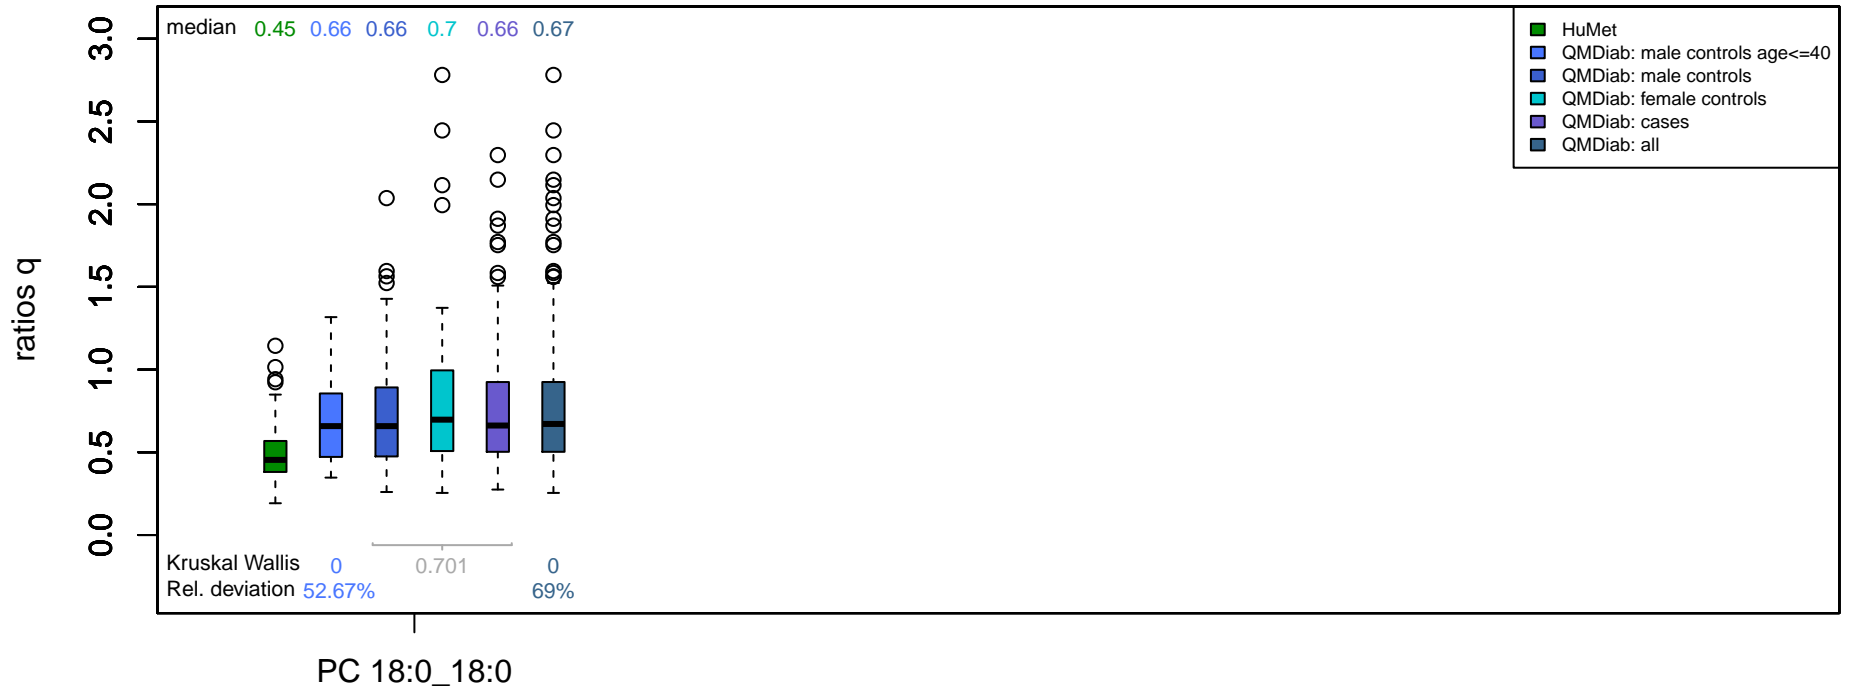

# PC aa C36:1

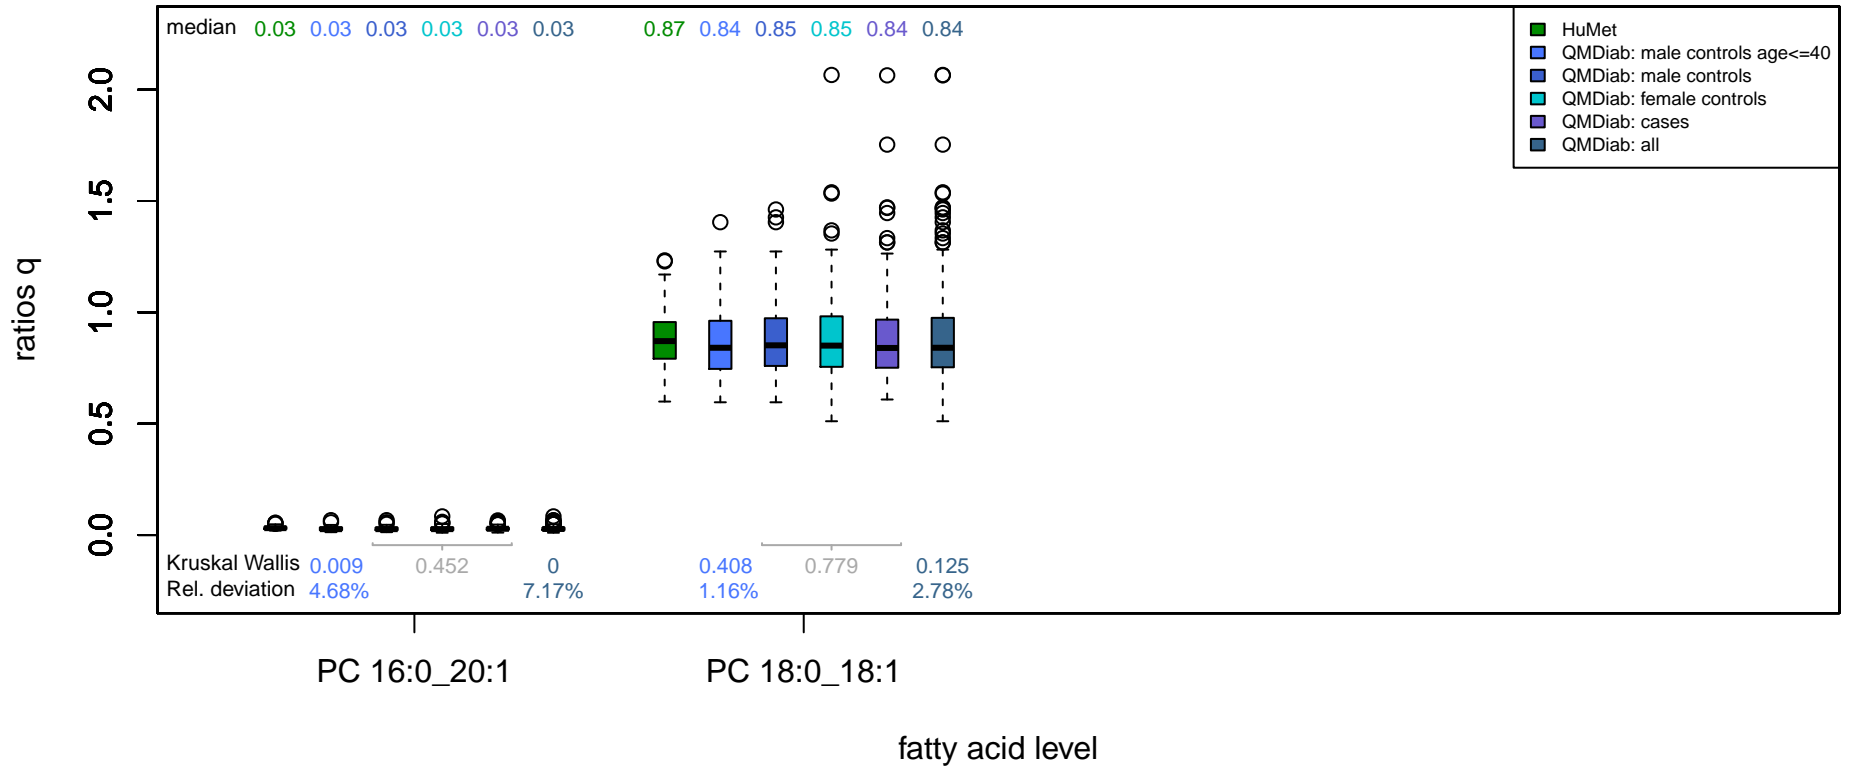

# PC aa C36:2

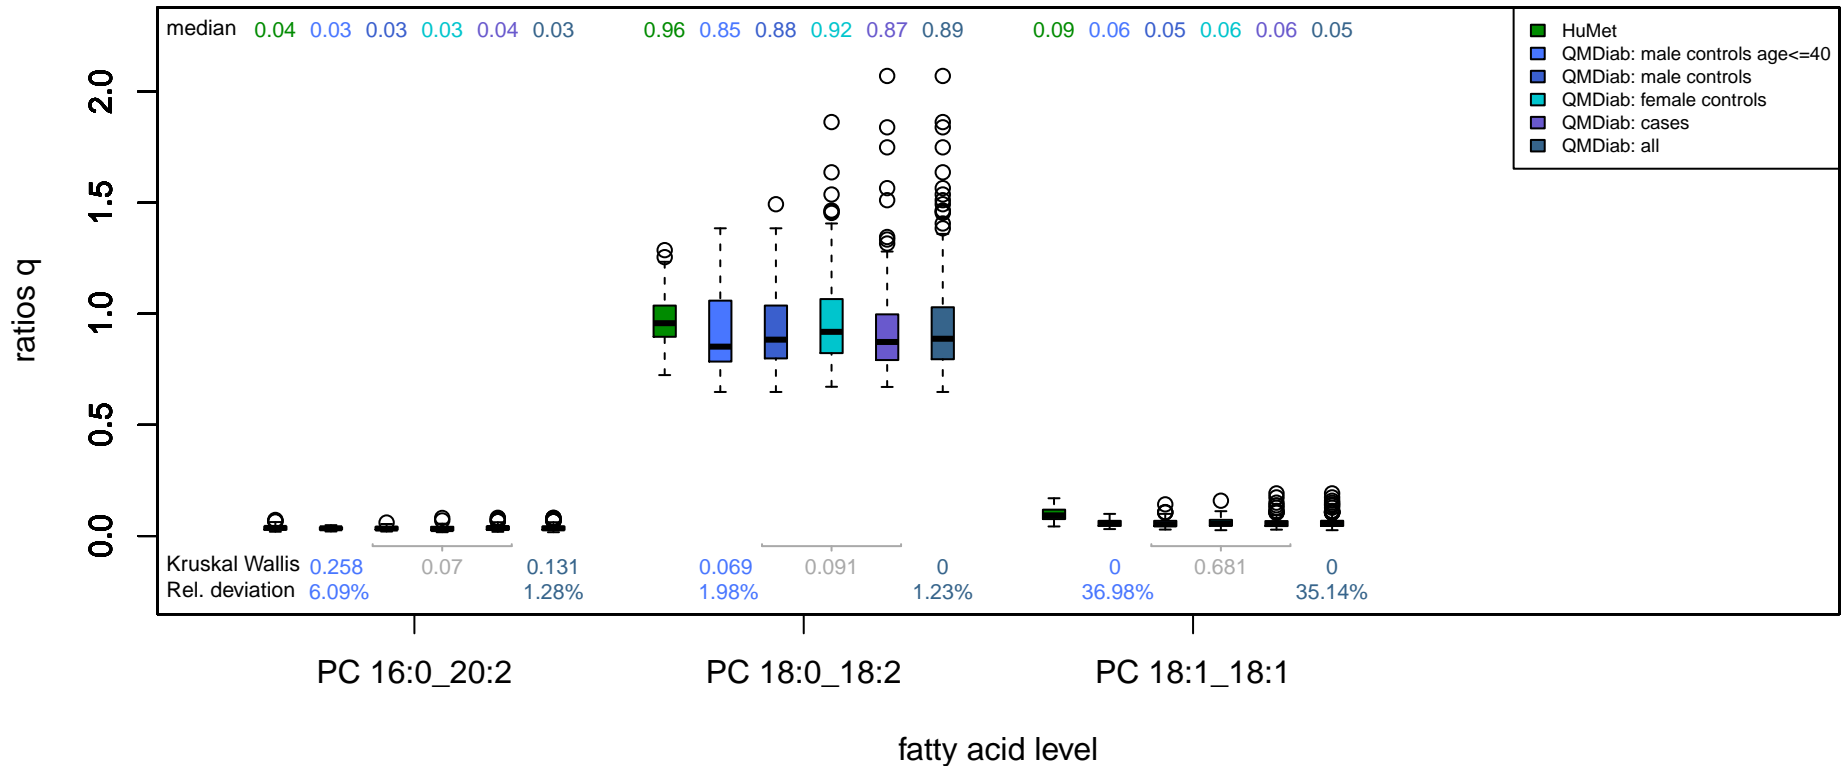

# PC aa C36:3

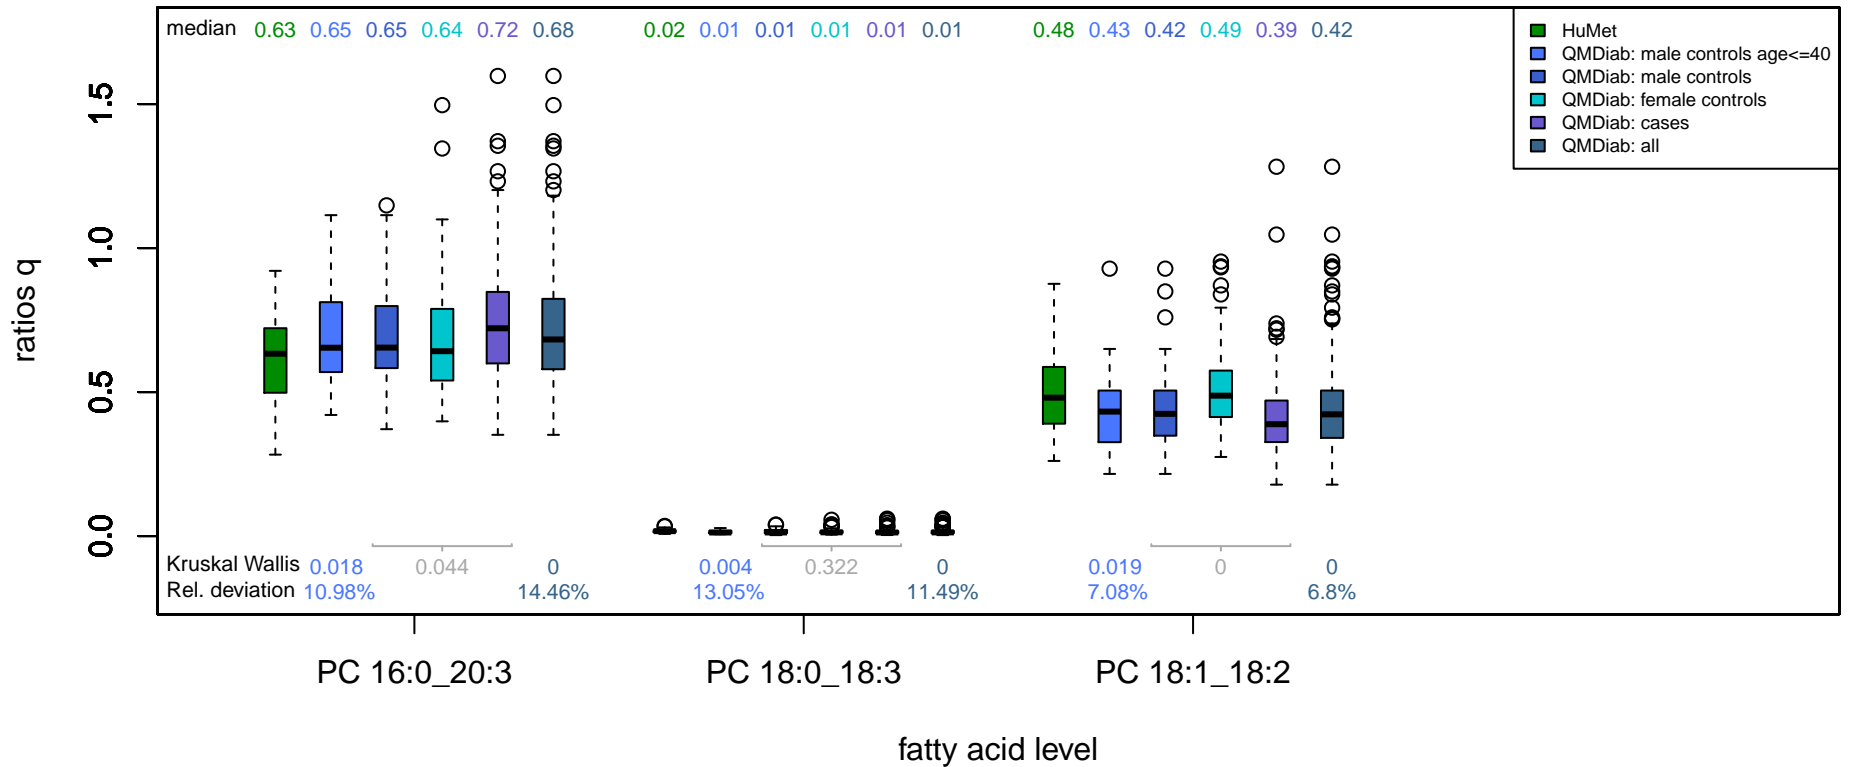

# PC aa C36:4

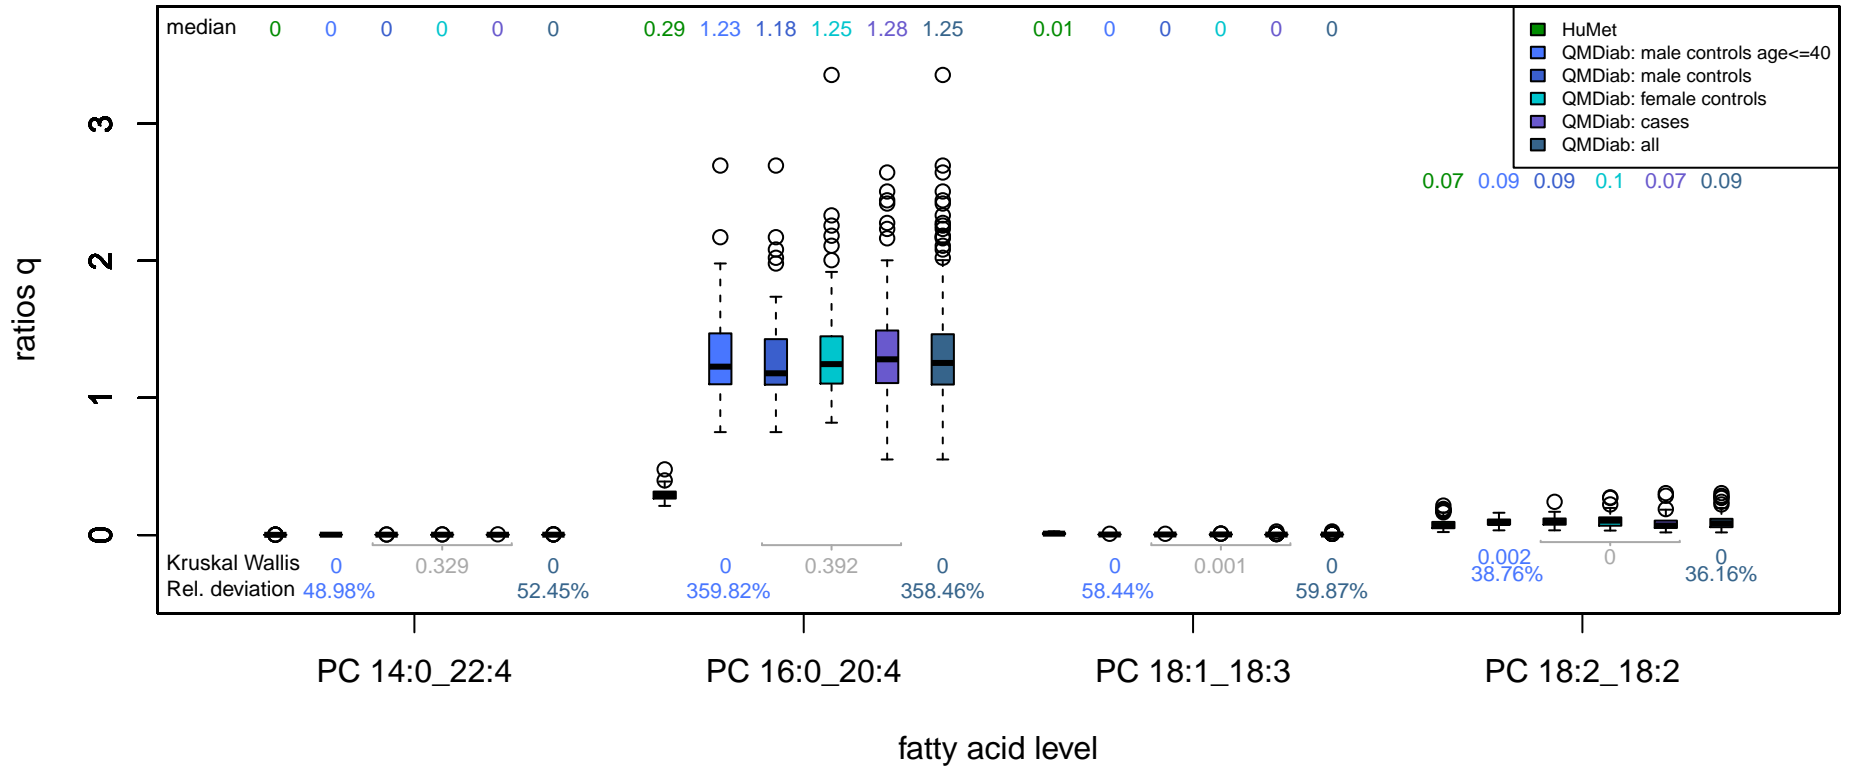

# PC aa C36:5

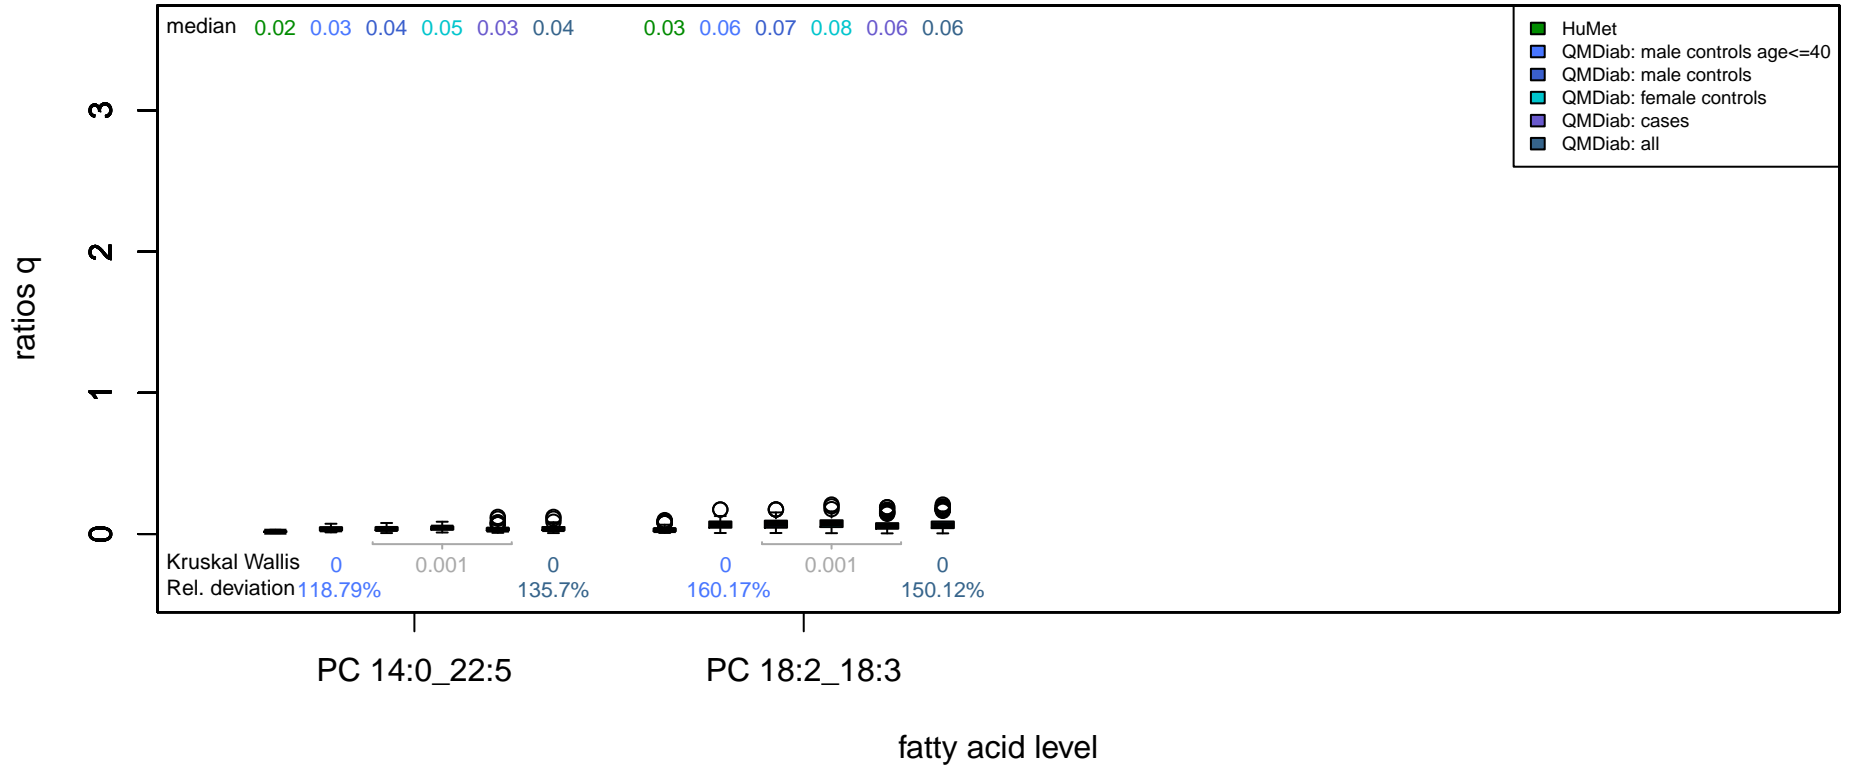

# PC aa C36:6

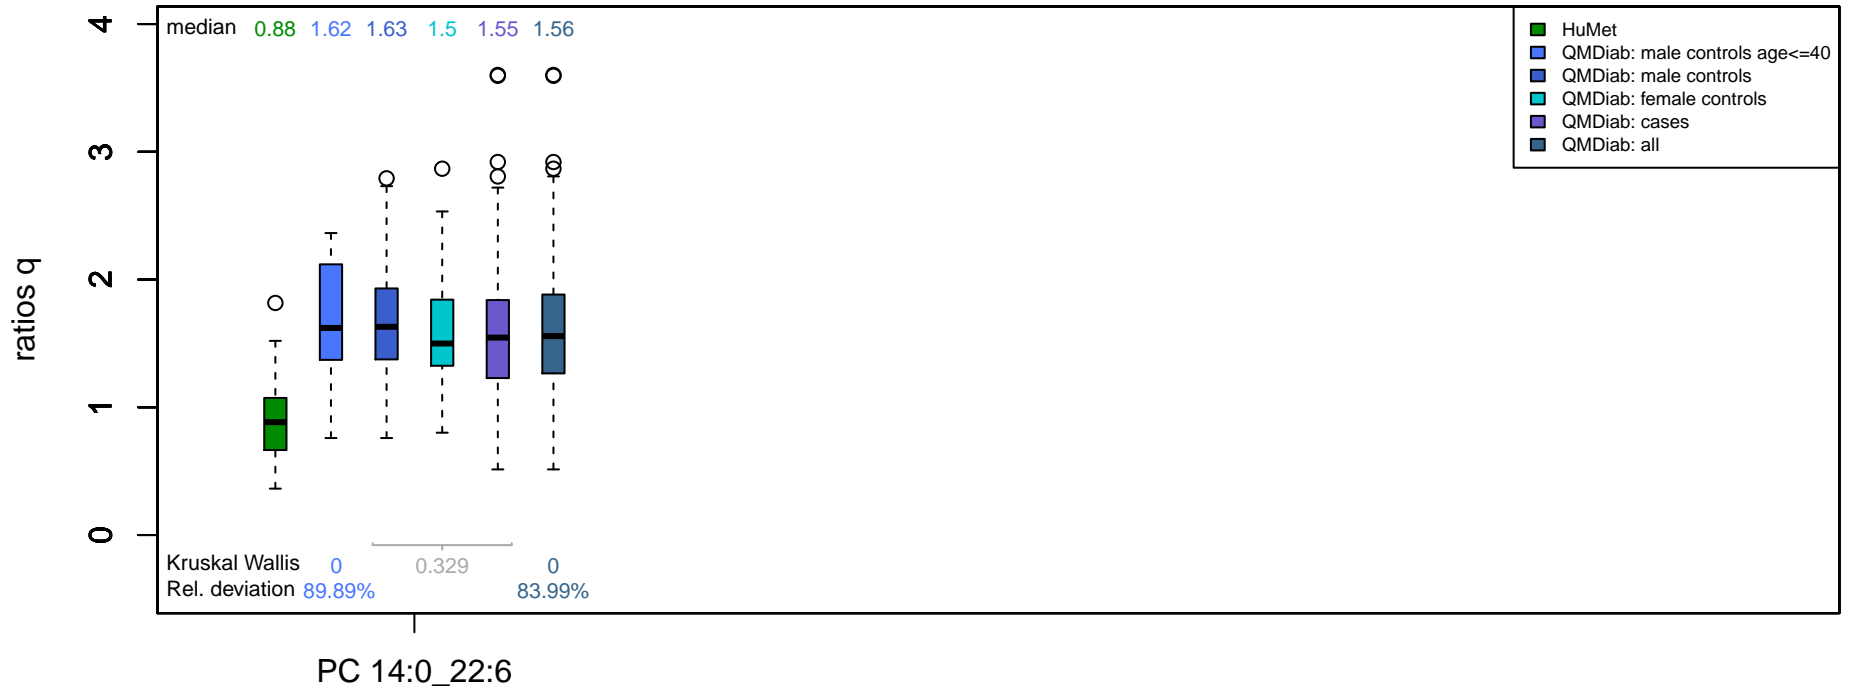

fatty acid level

# PC aa C38:0

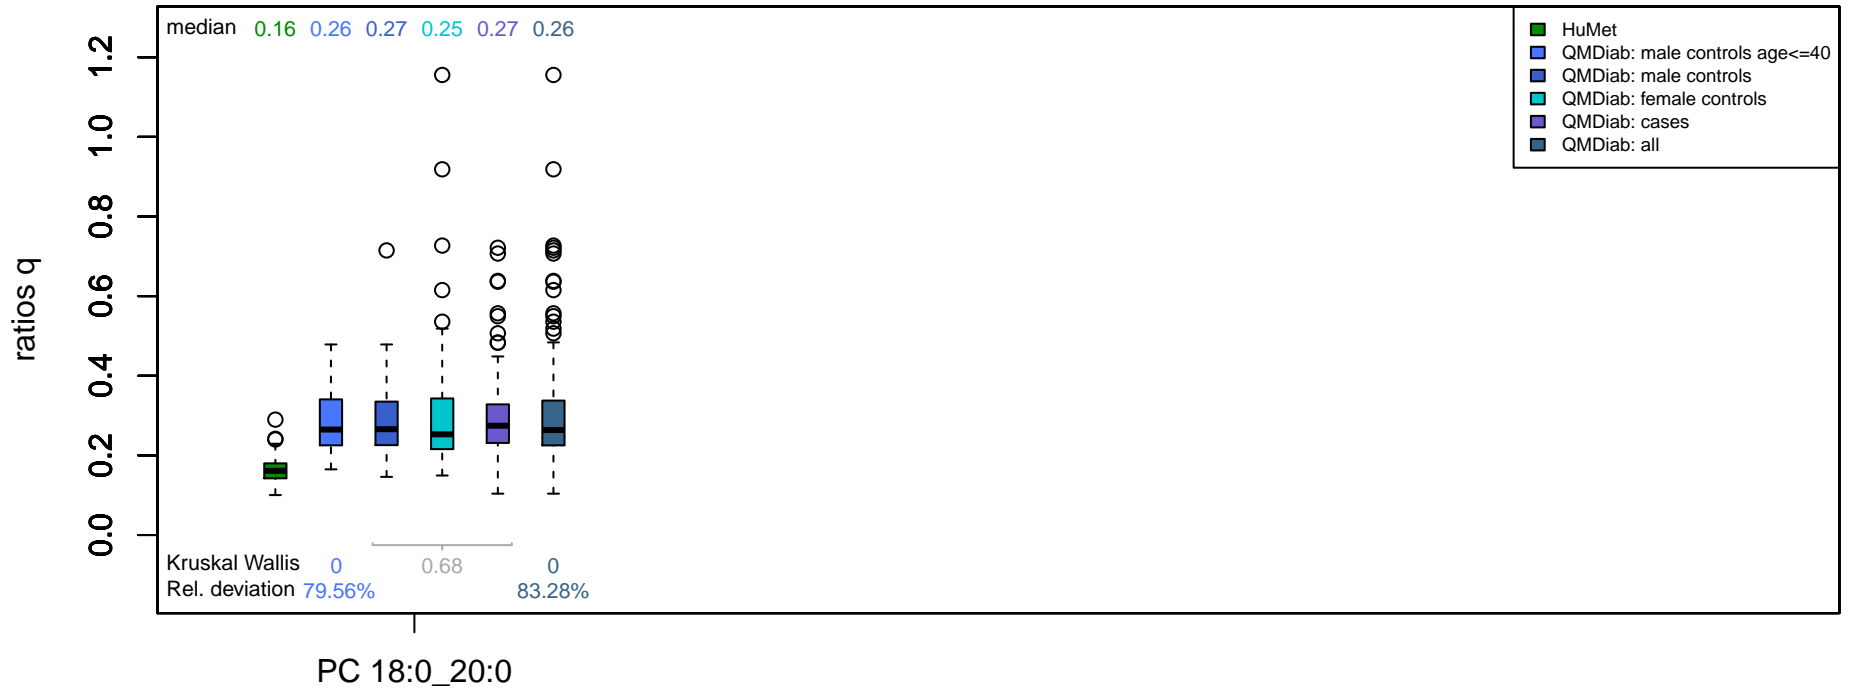



fatty acid level

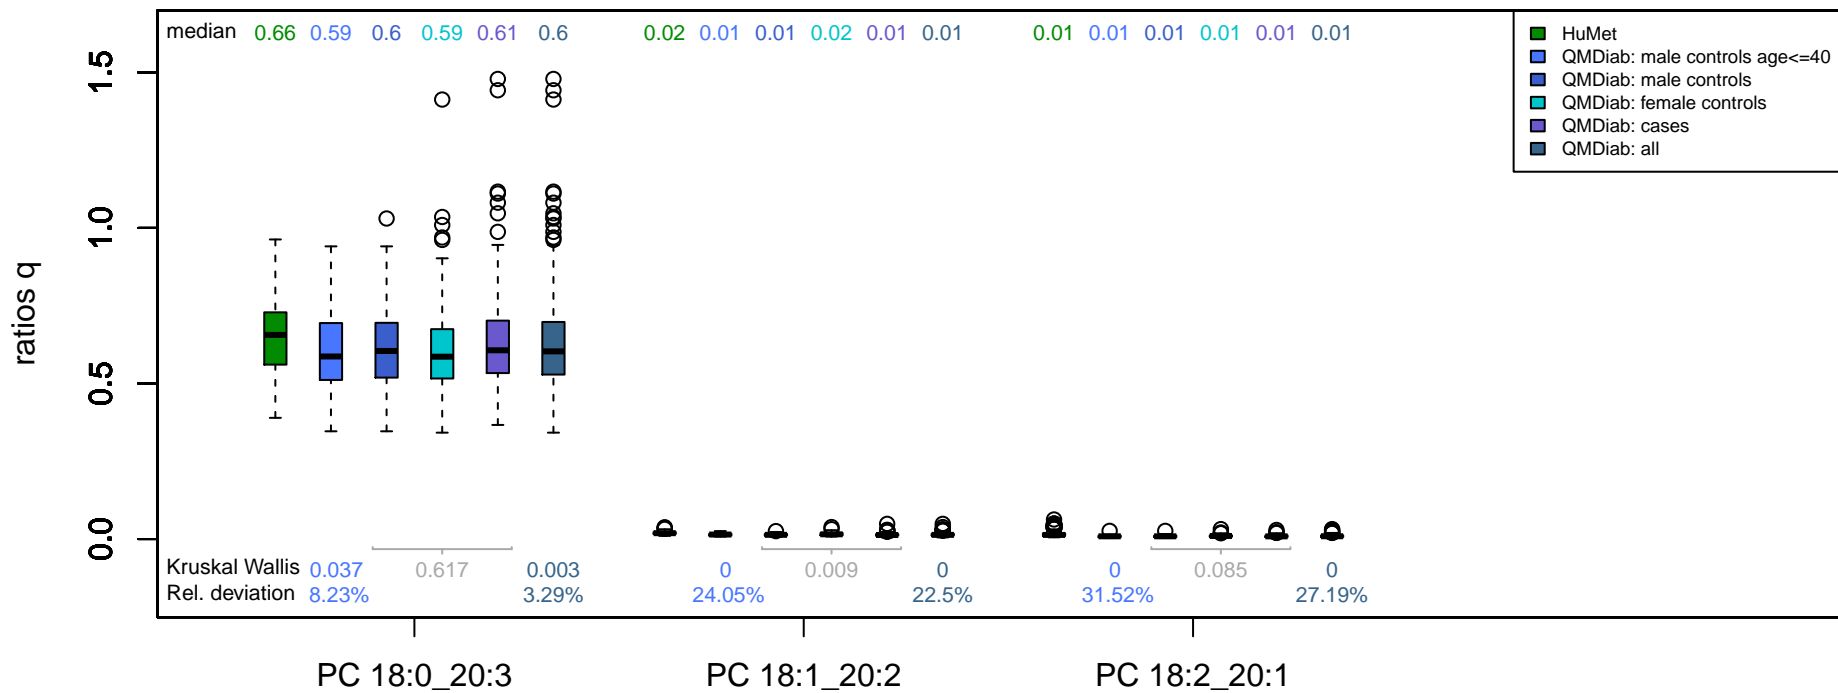

# PC aa C38:4

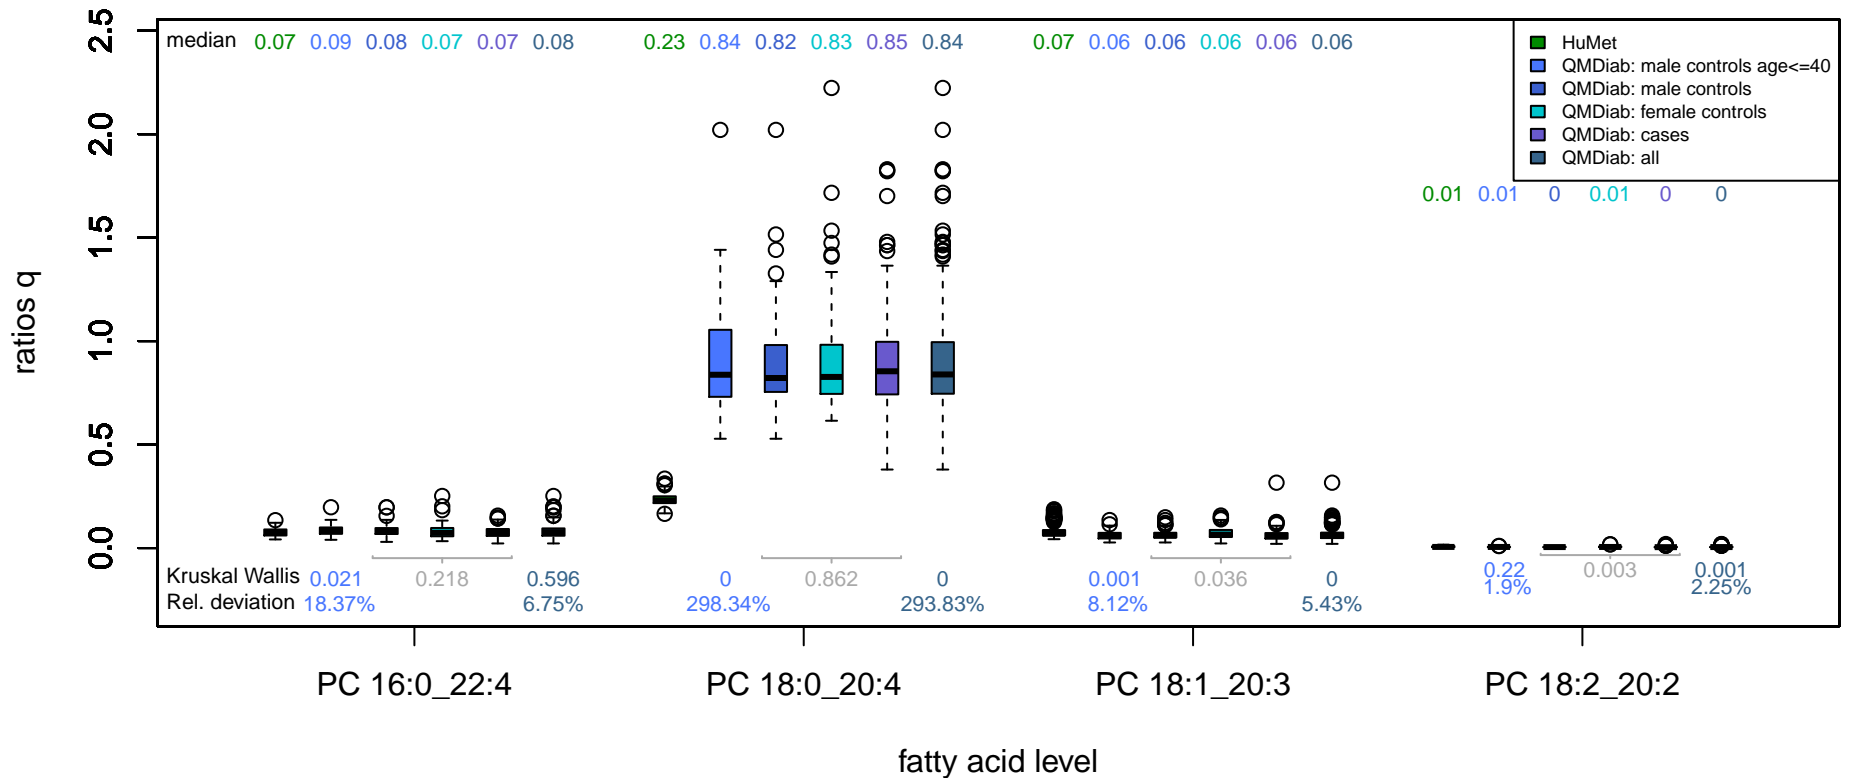

# PC aa C38:5

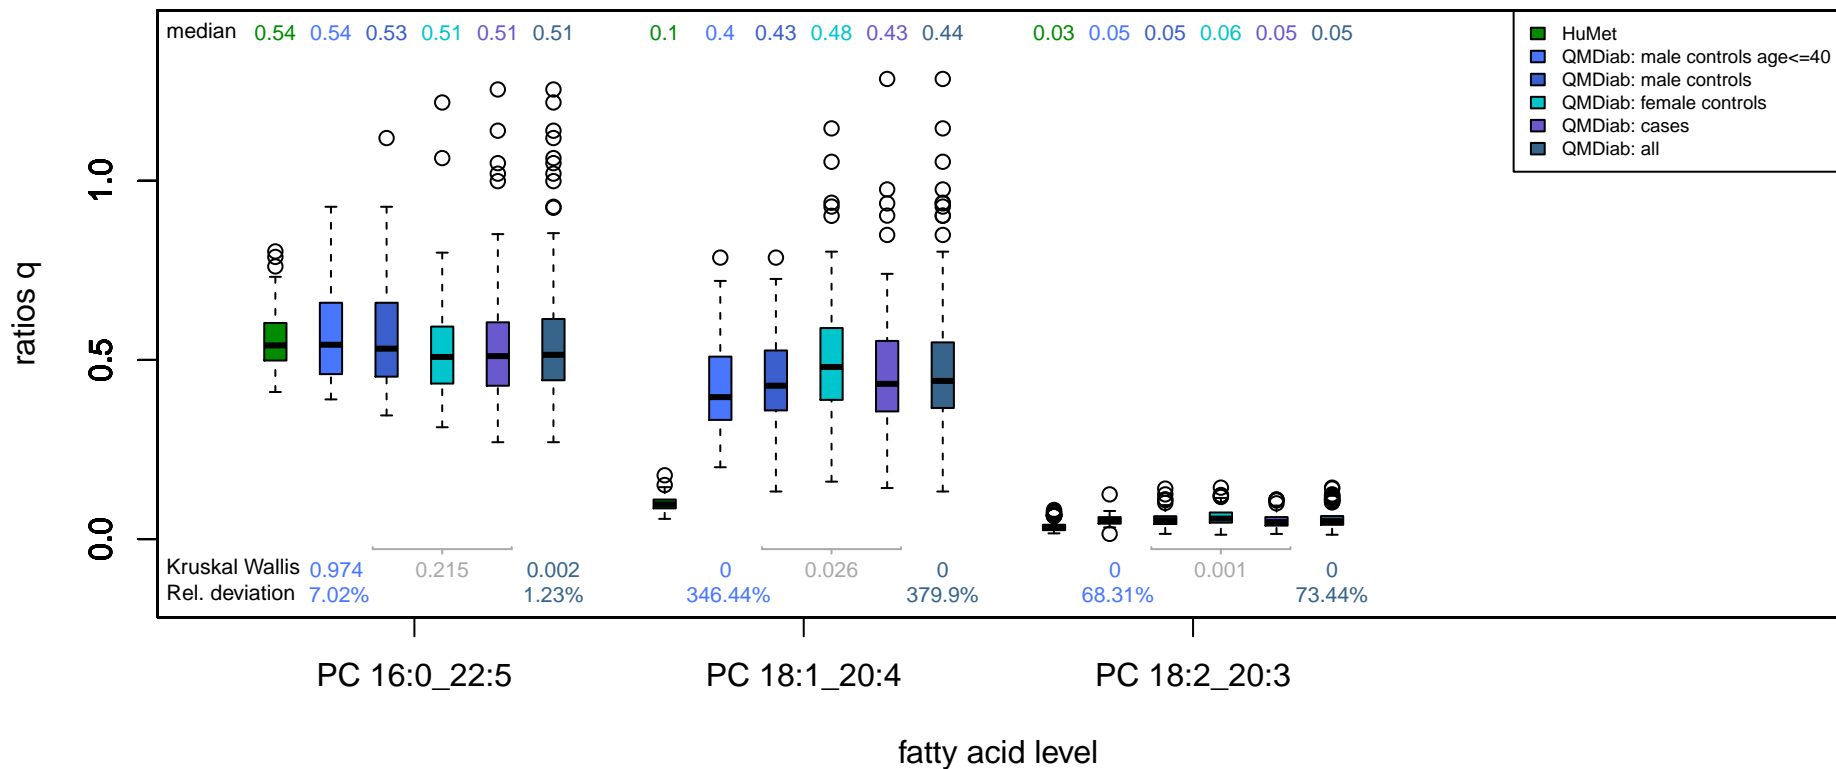

# PC aa C38:6

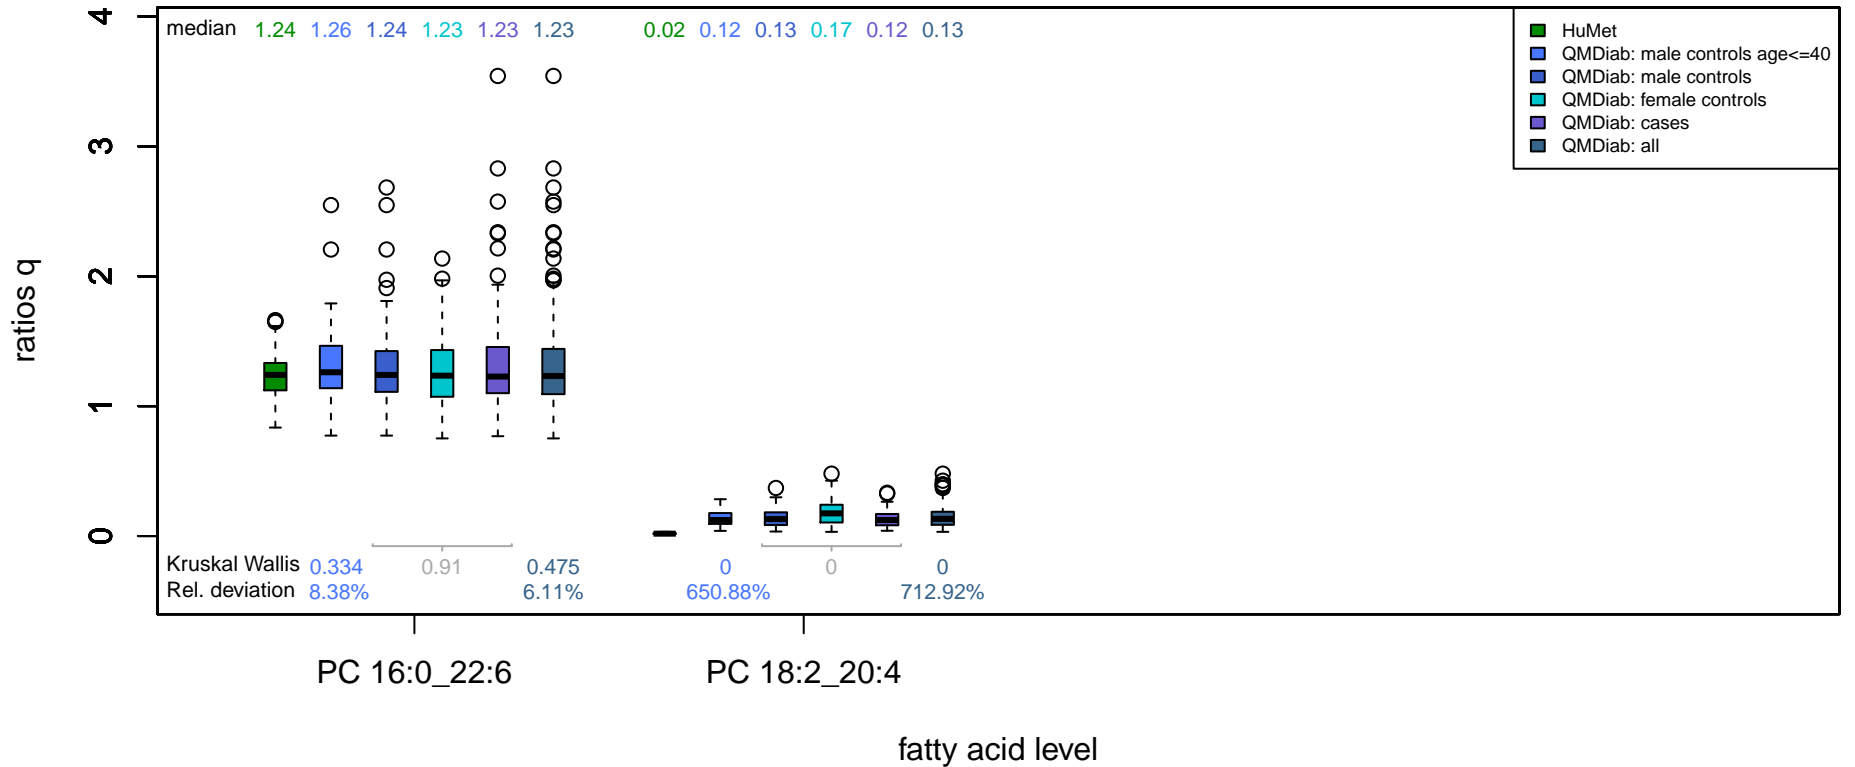

# PC aa C40:3

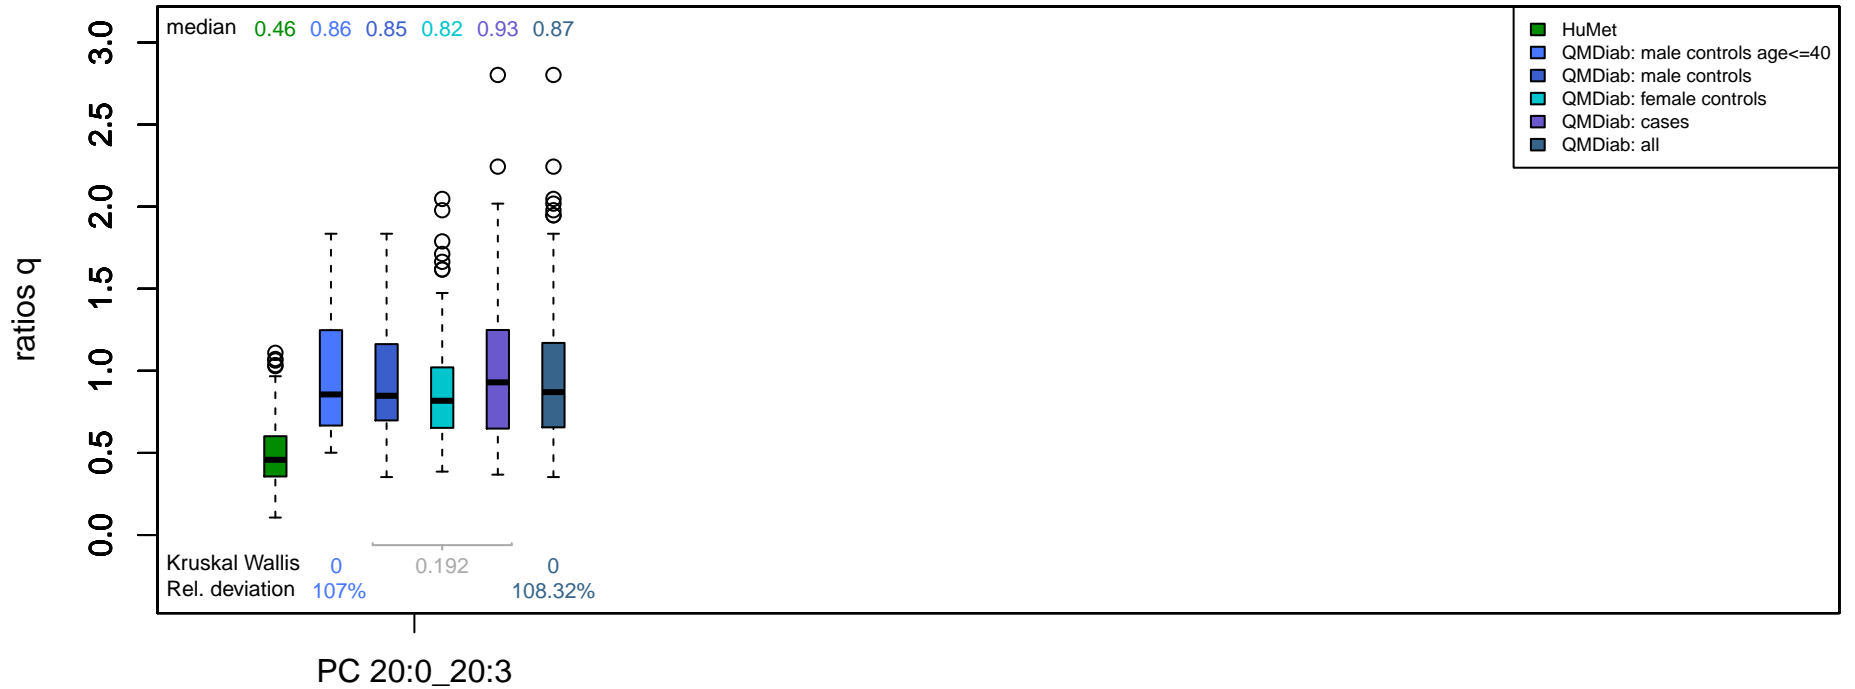

# PC aa C40:4

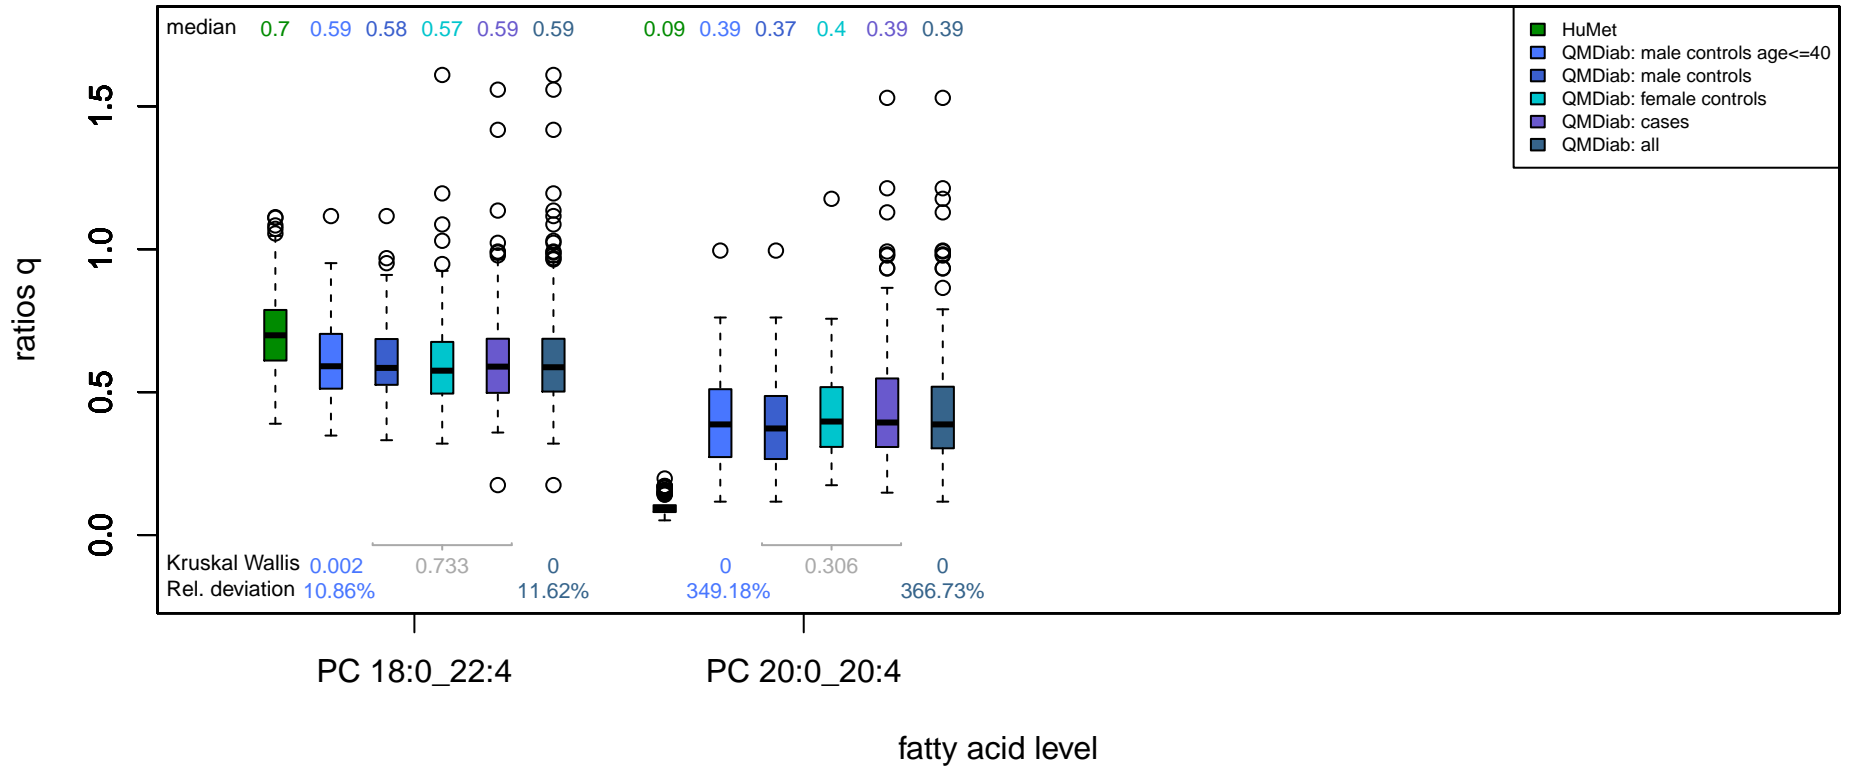

# PC aa C40:5

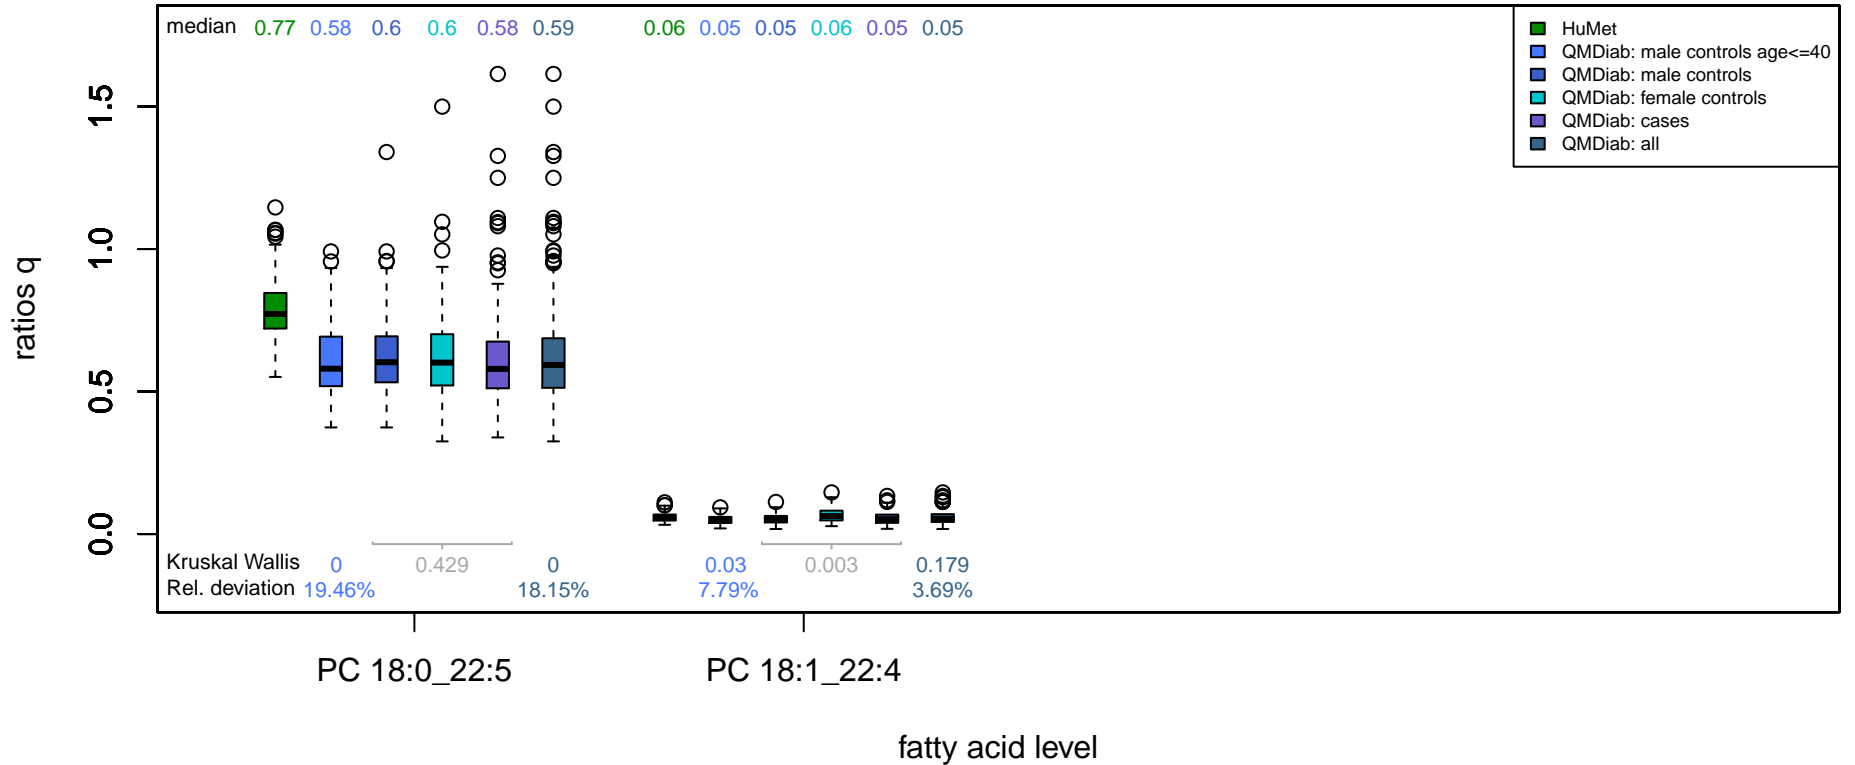

# PC aa C40:6

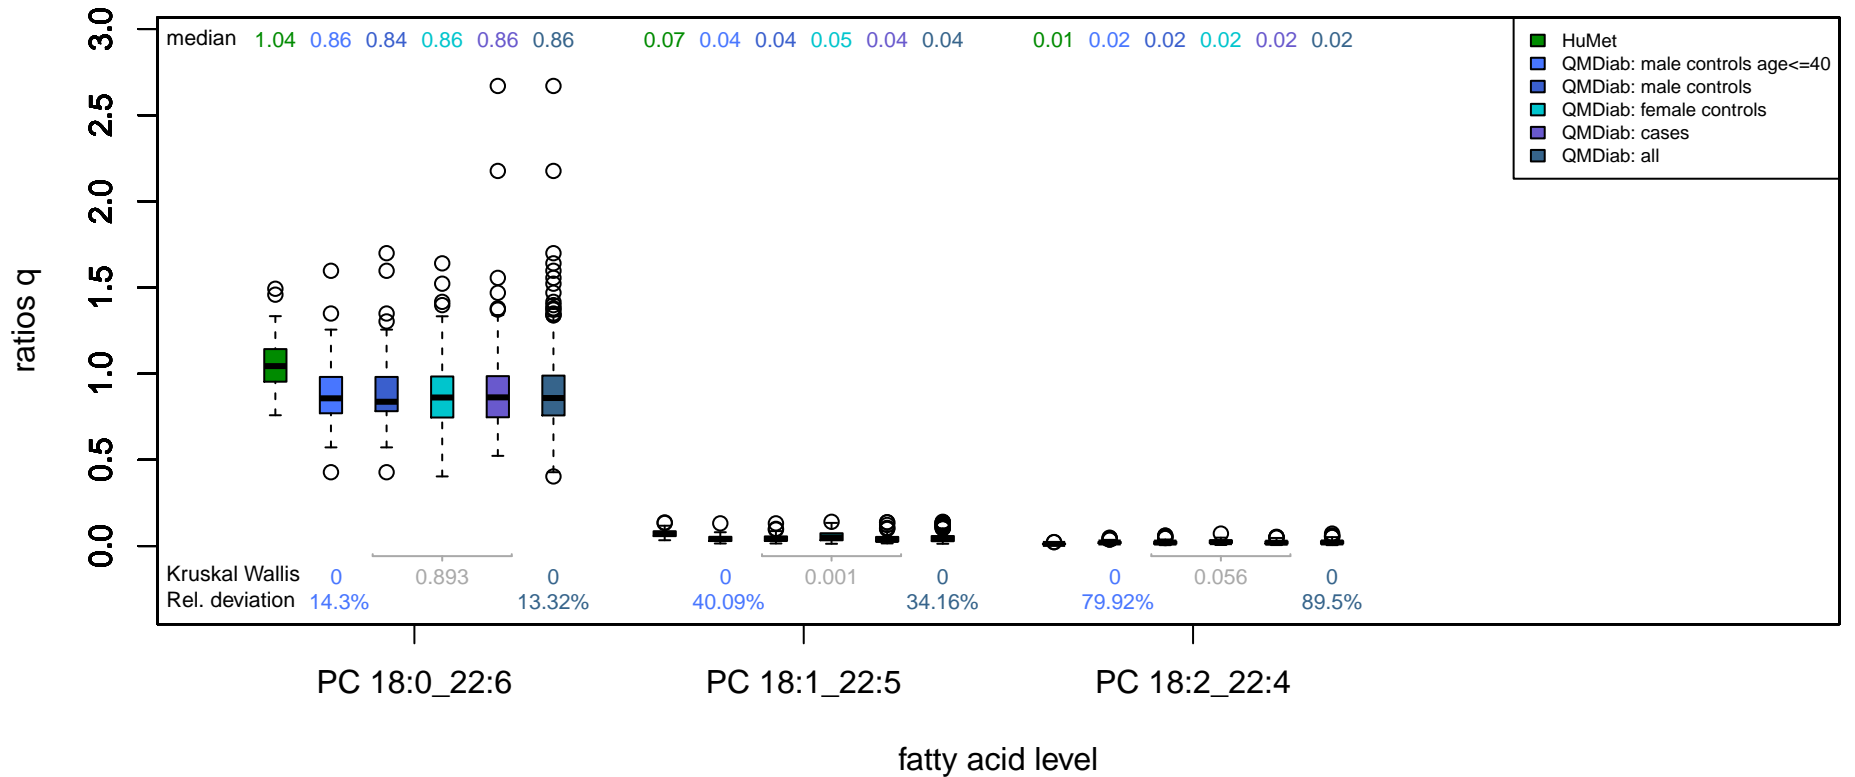



# PC aa C42:6

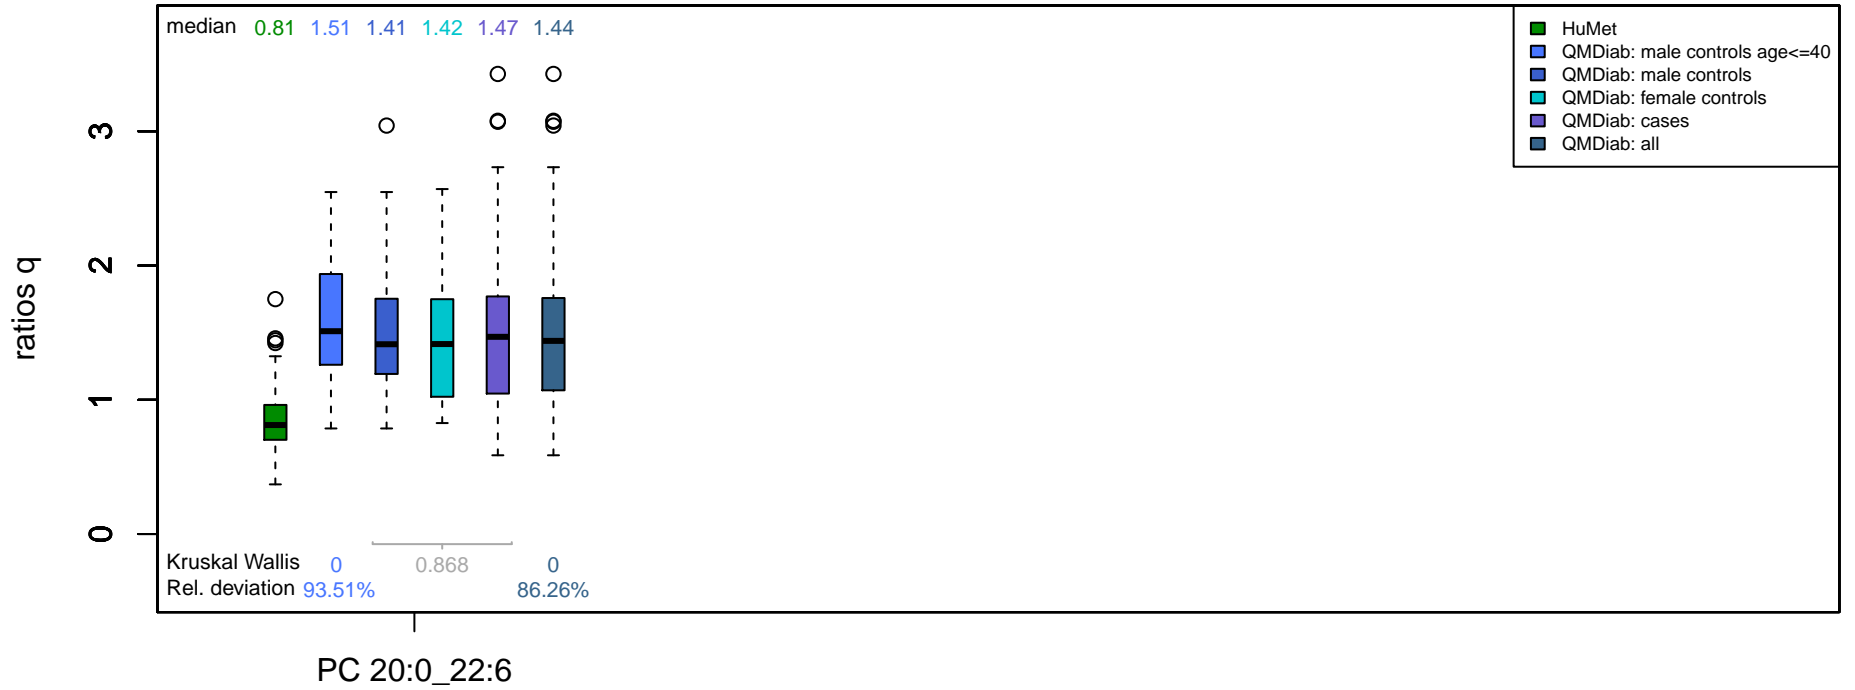

# PC ae C34:1

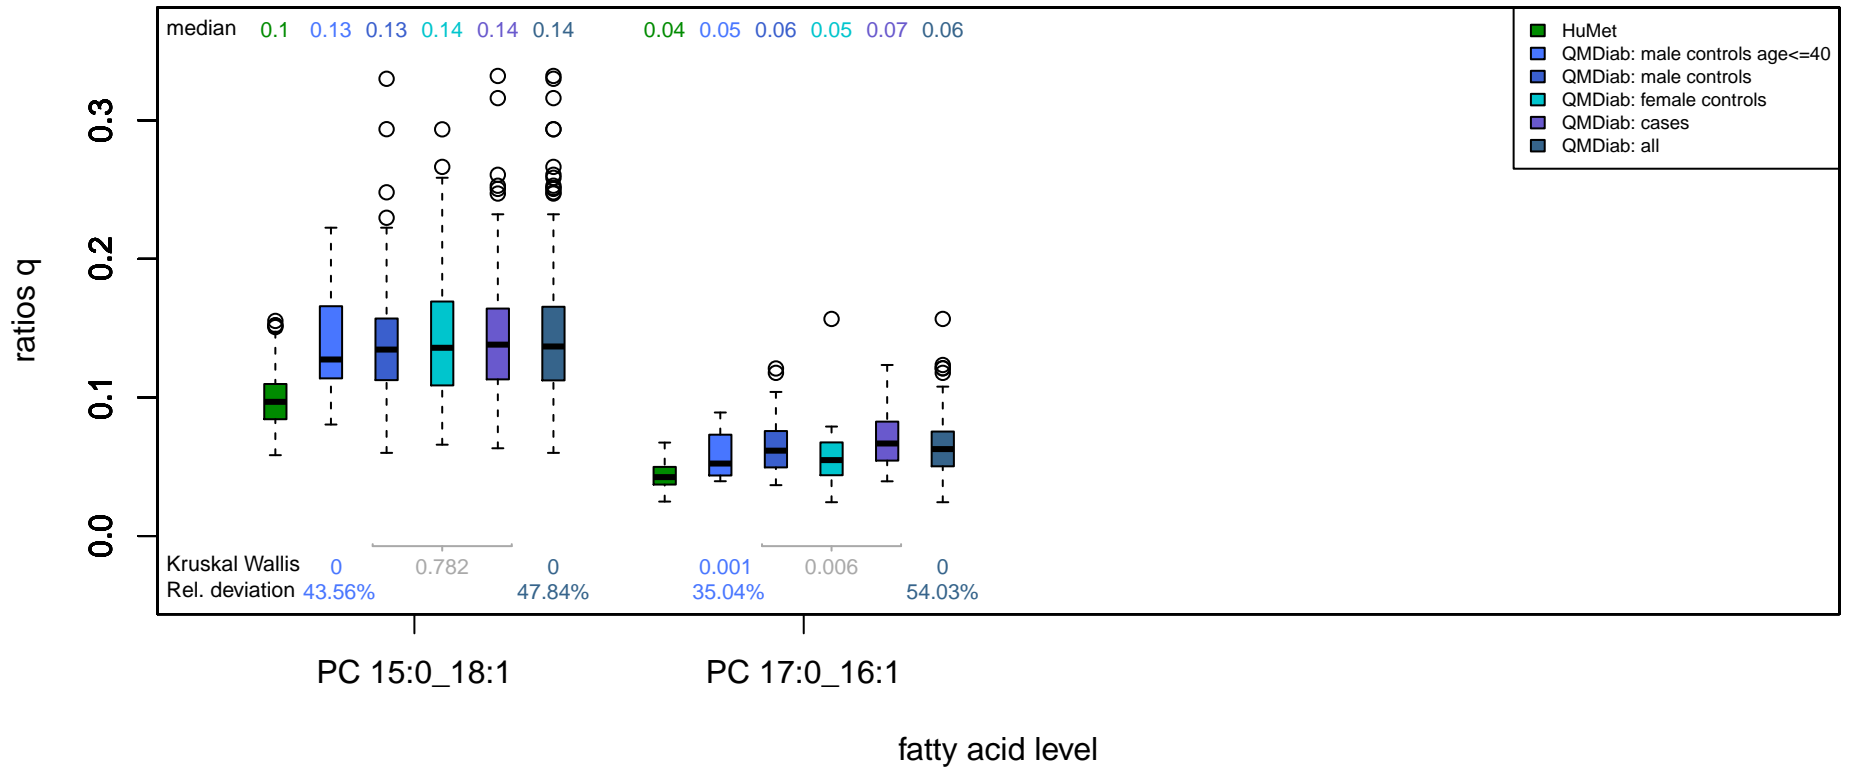

# PC ae C34:2

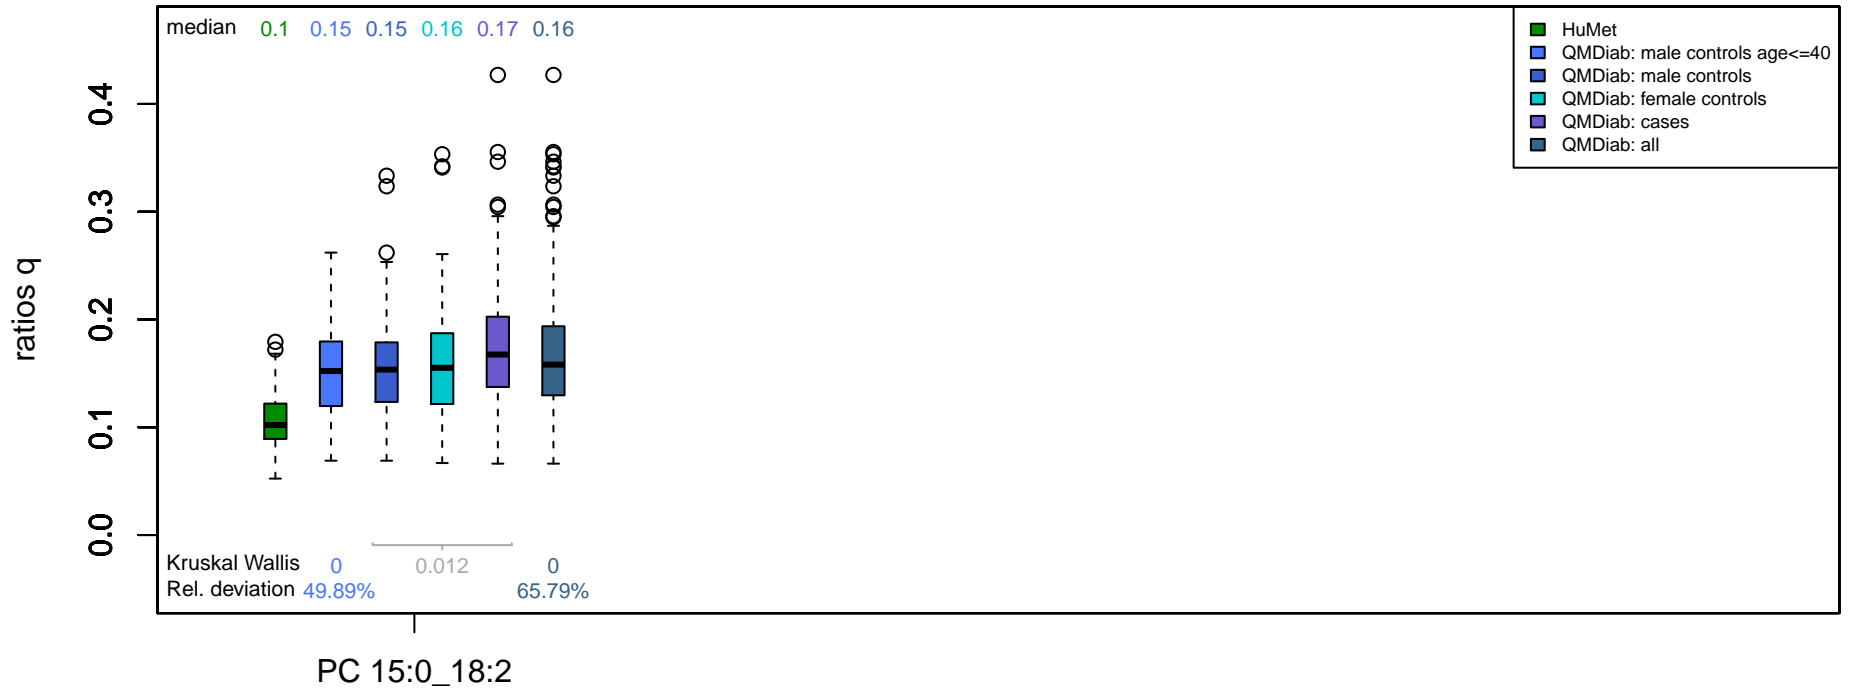

# PC ae C36:1

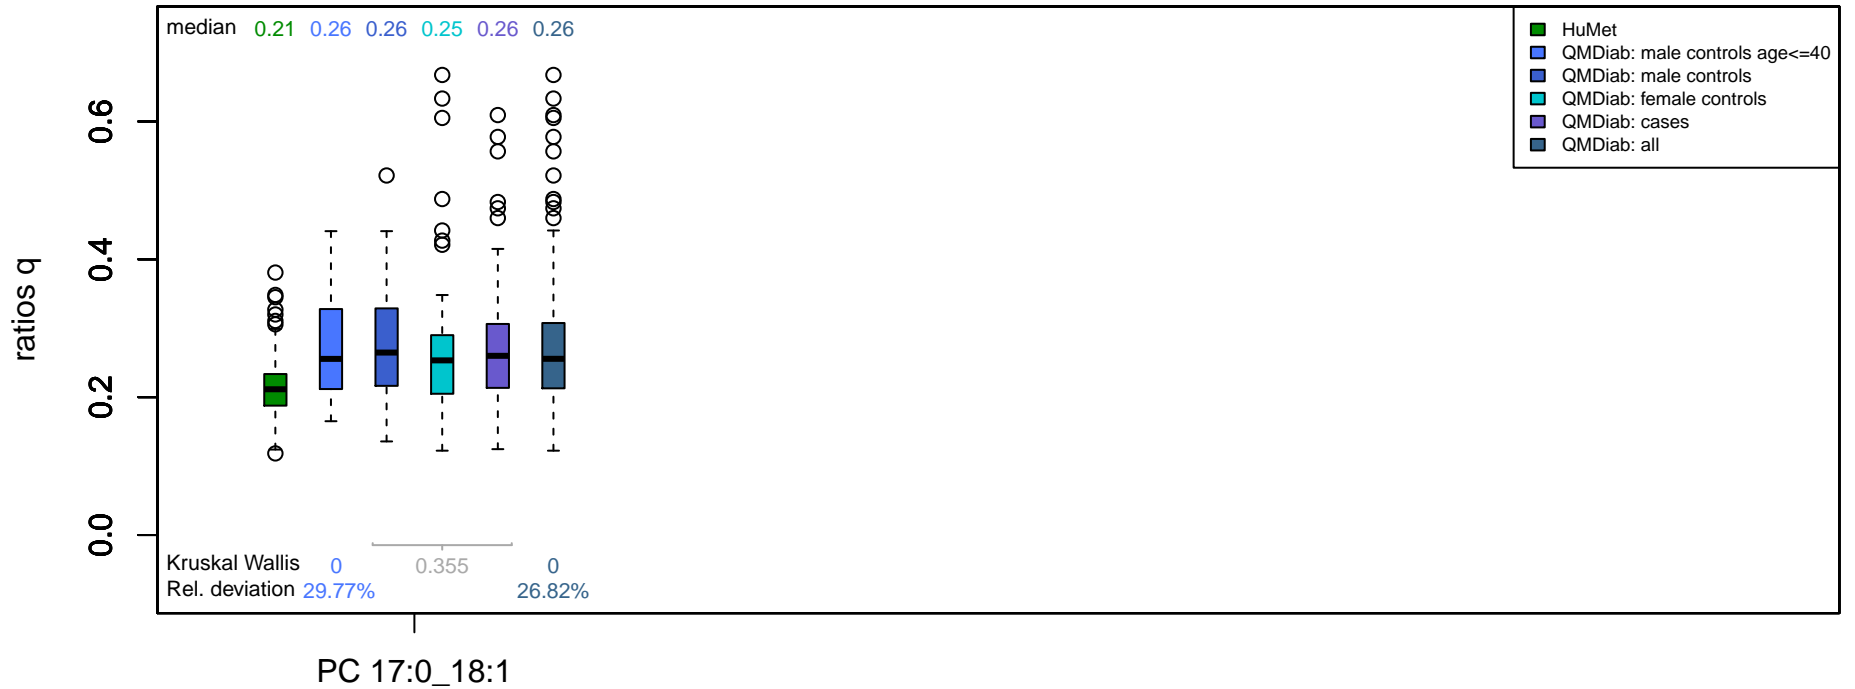

# PC ae C36:2

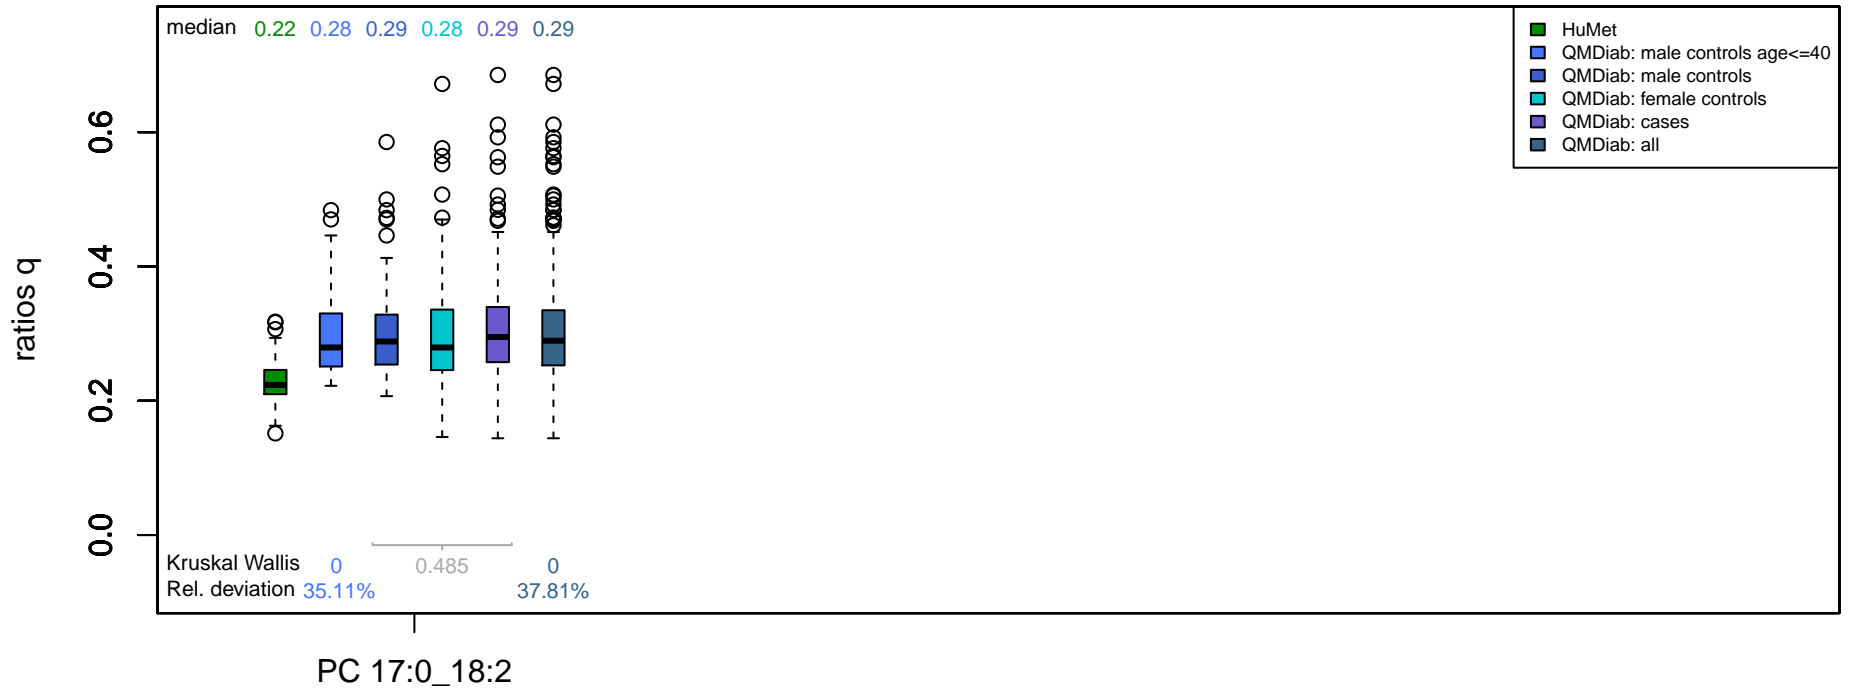

# PC ae C36:3

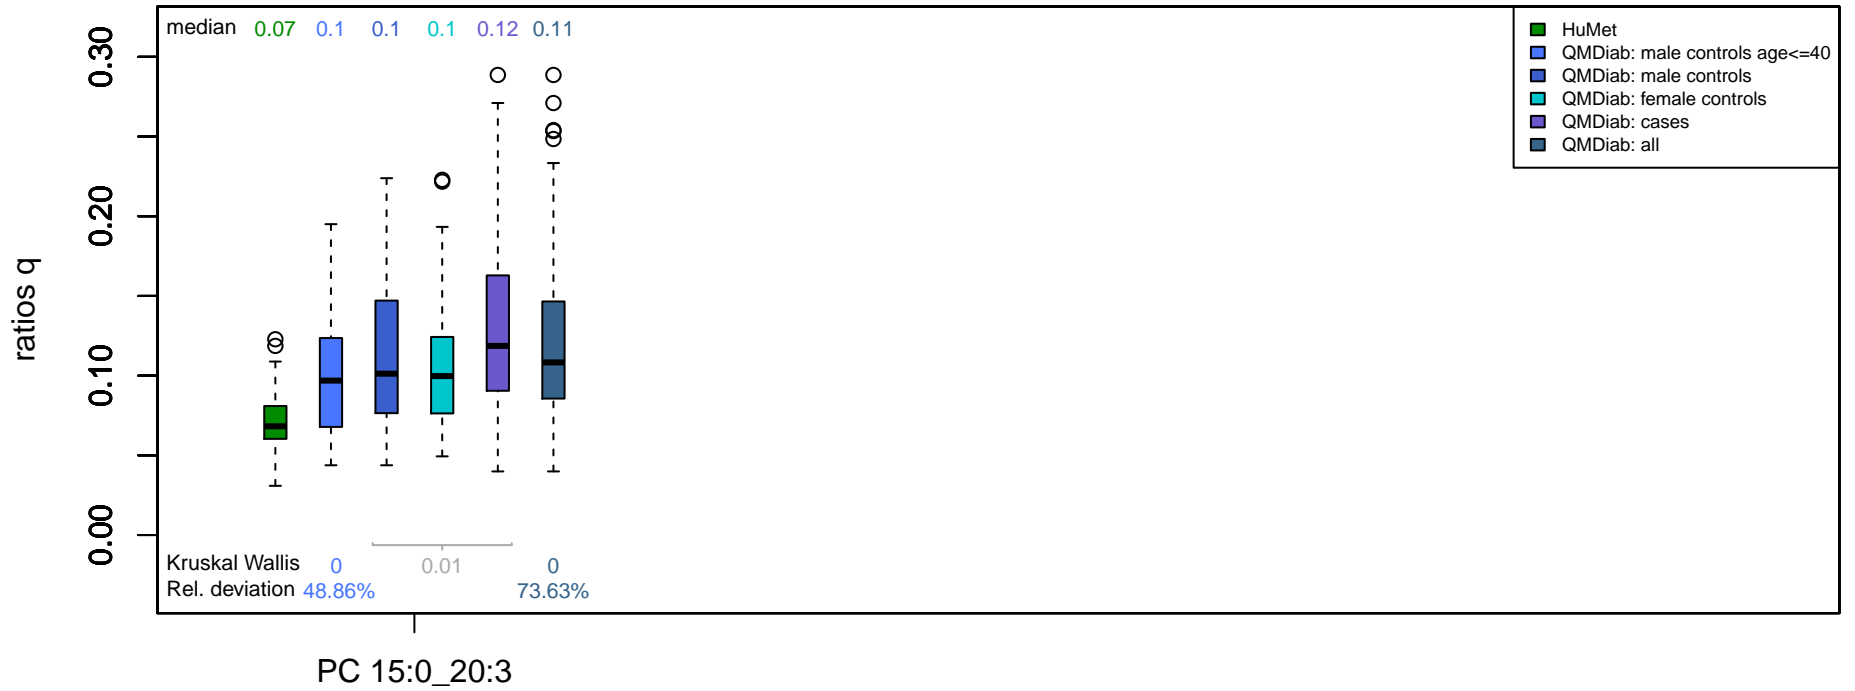

# PC ae C36:4

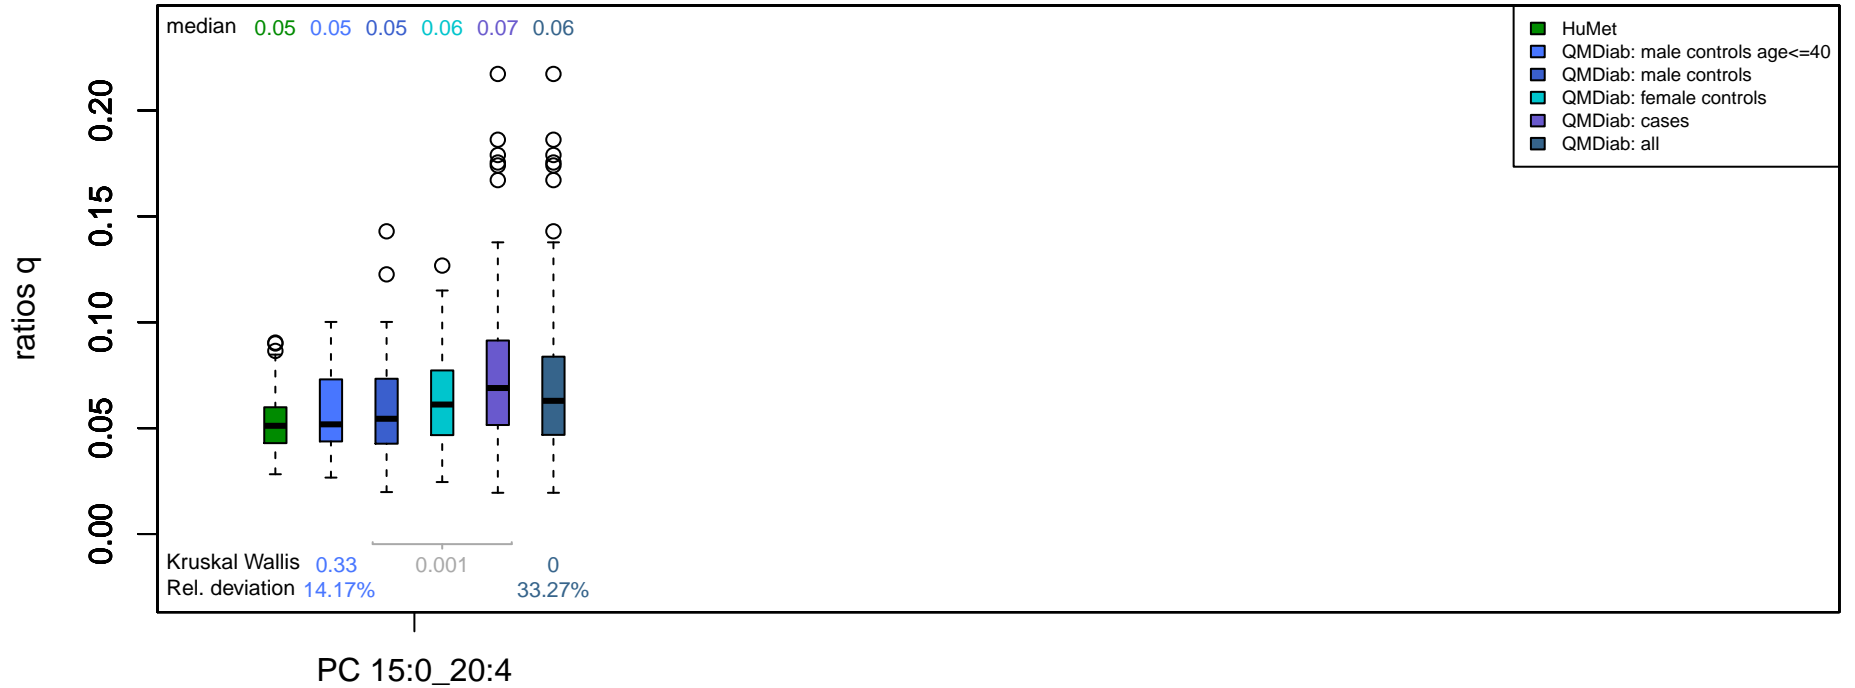

# PC ae C38:3

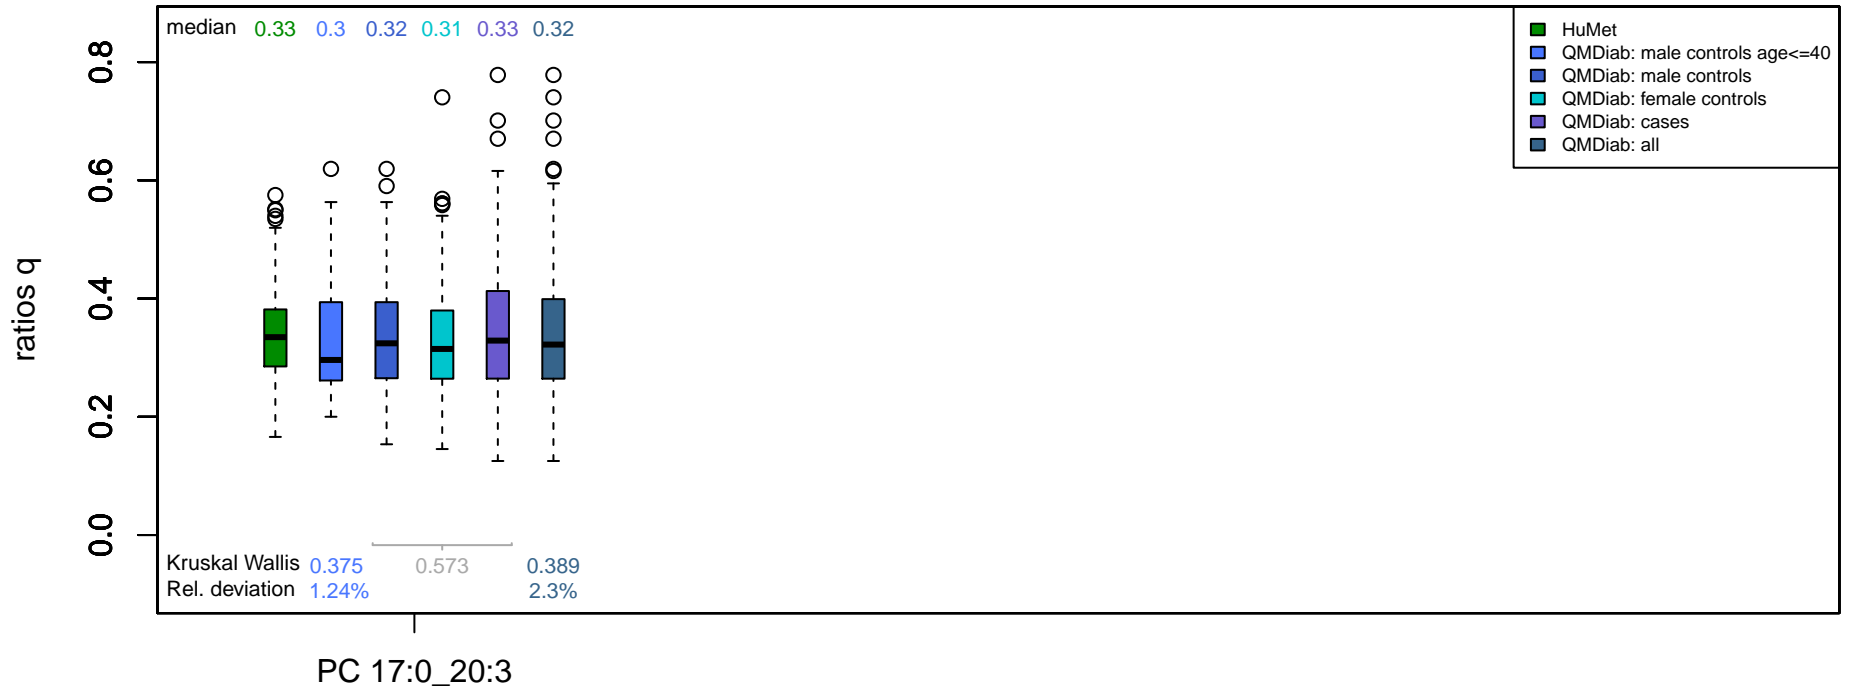



# PC ae C38:4

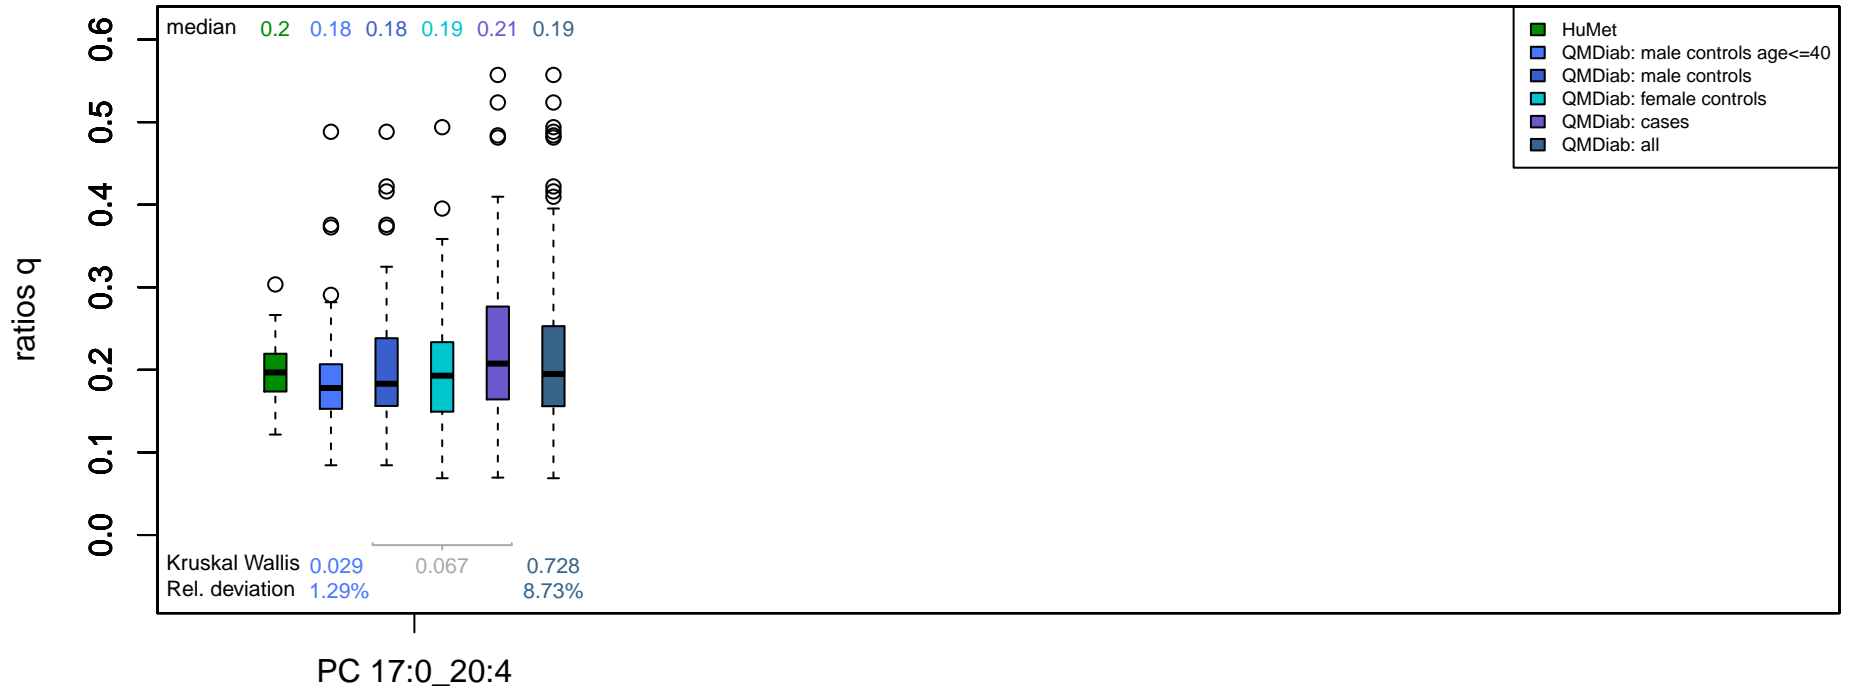

## PC ae C38:5

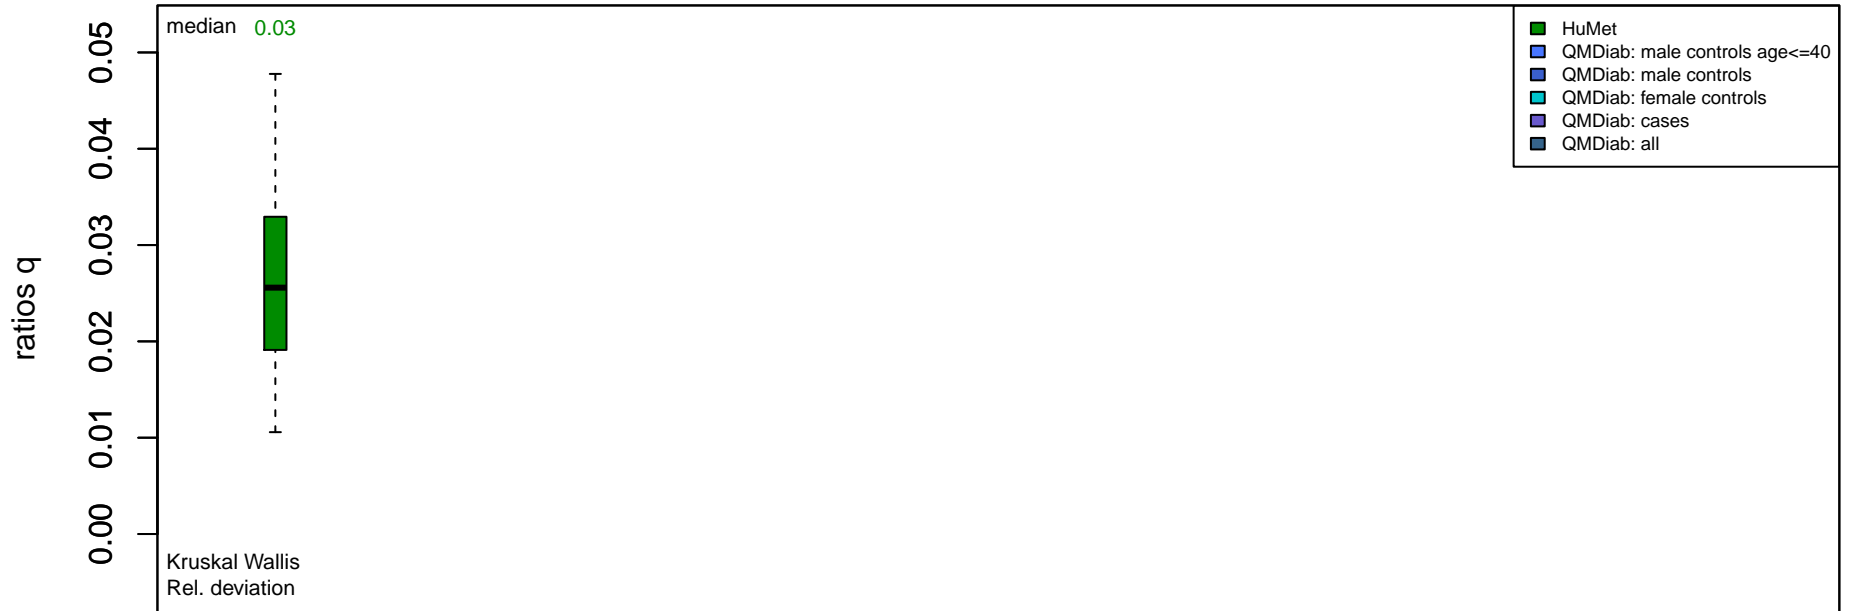

## PC ae C38:6

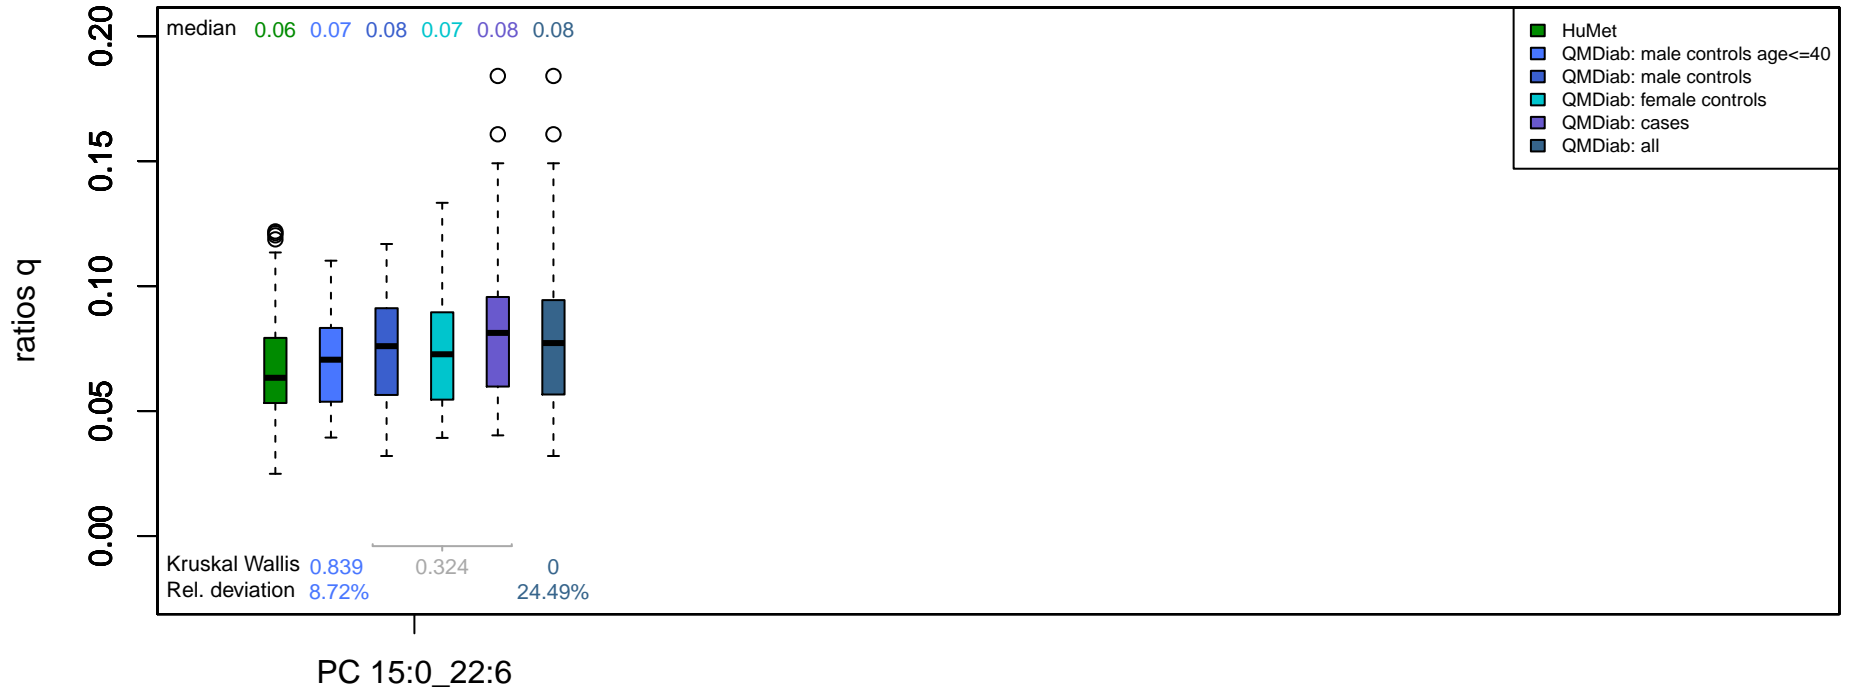

# PC ae C40:1

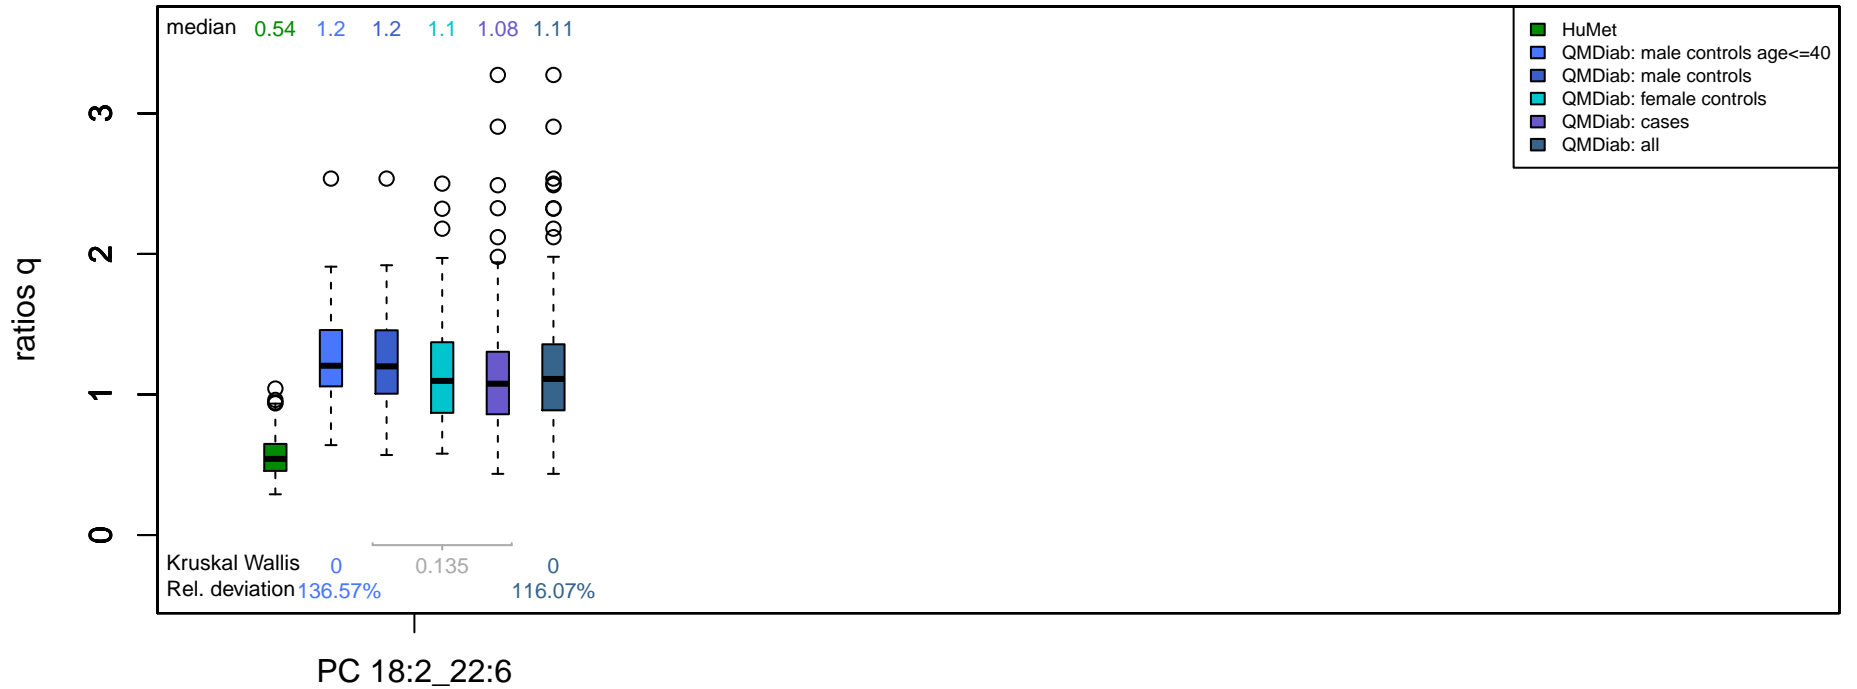

## PC ae C40:5

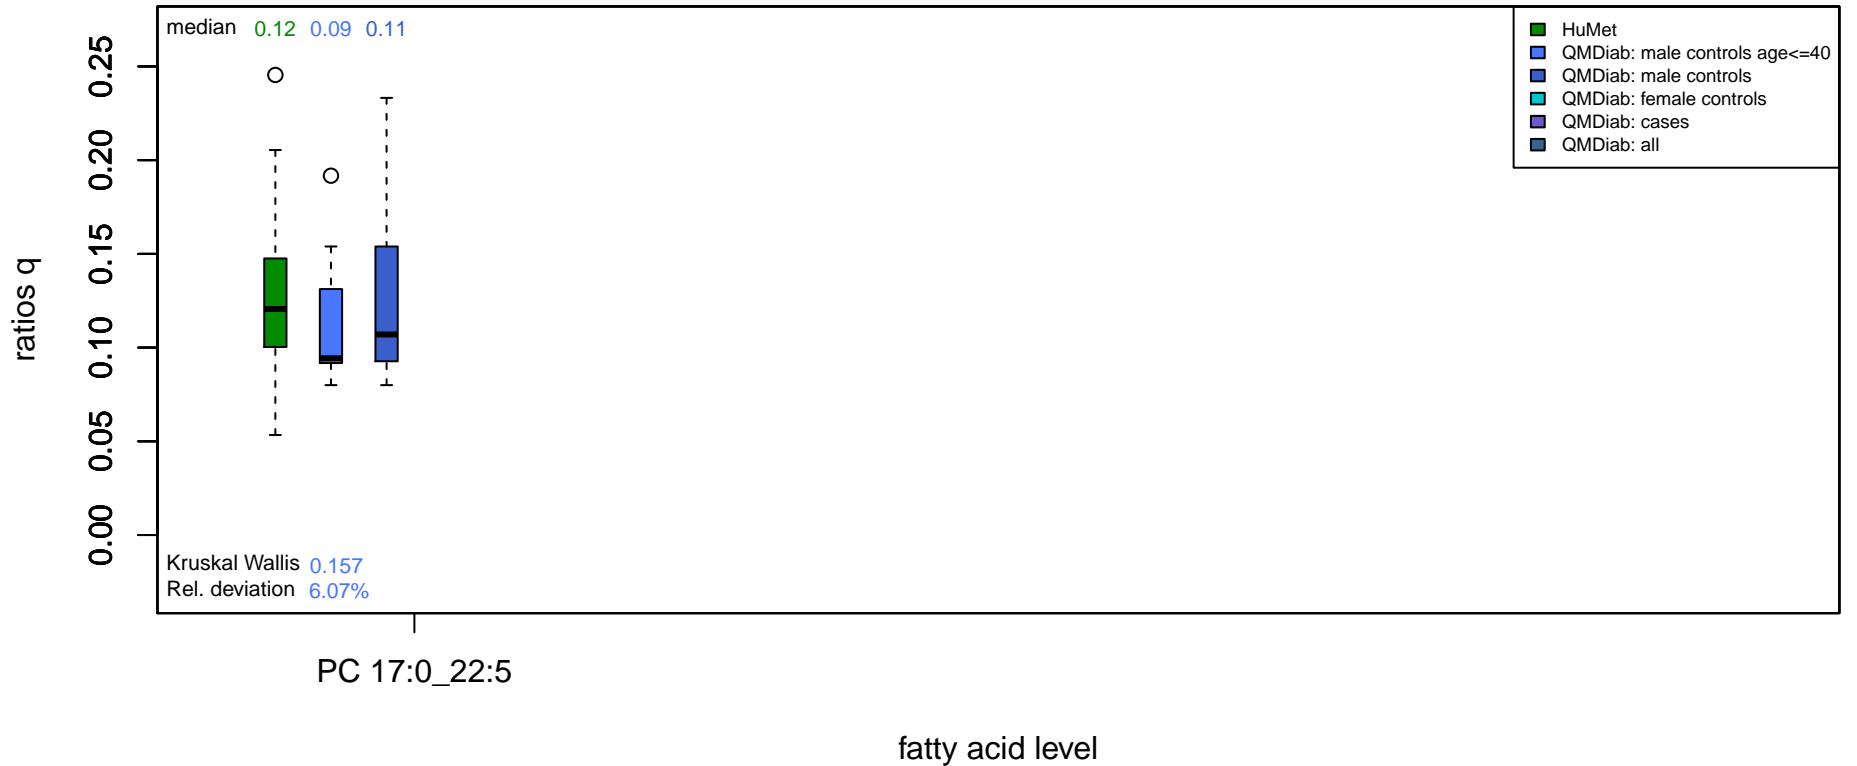

## PC ae C40:6

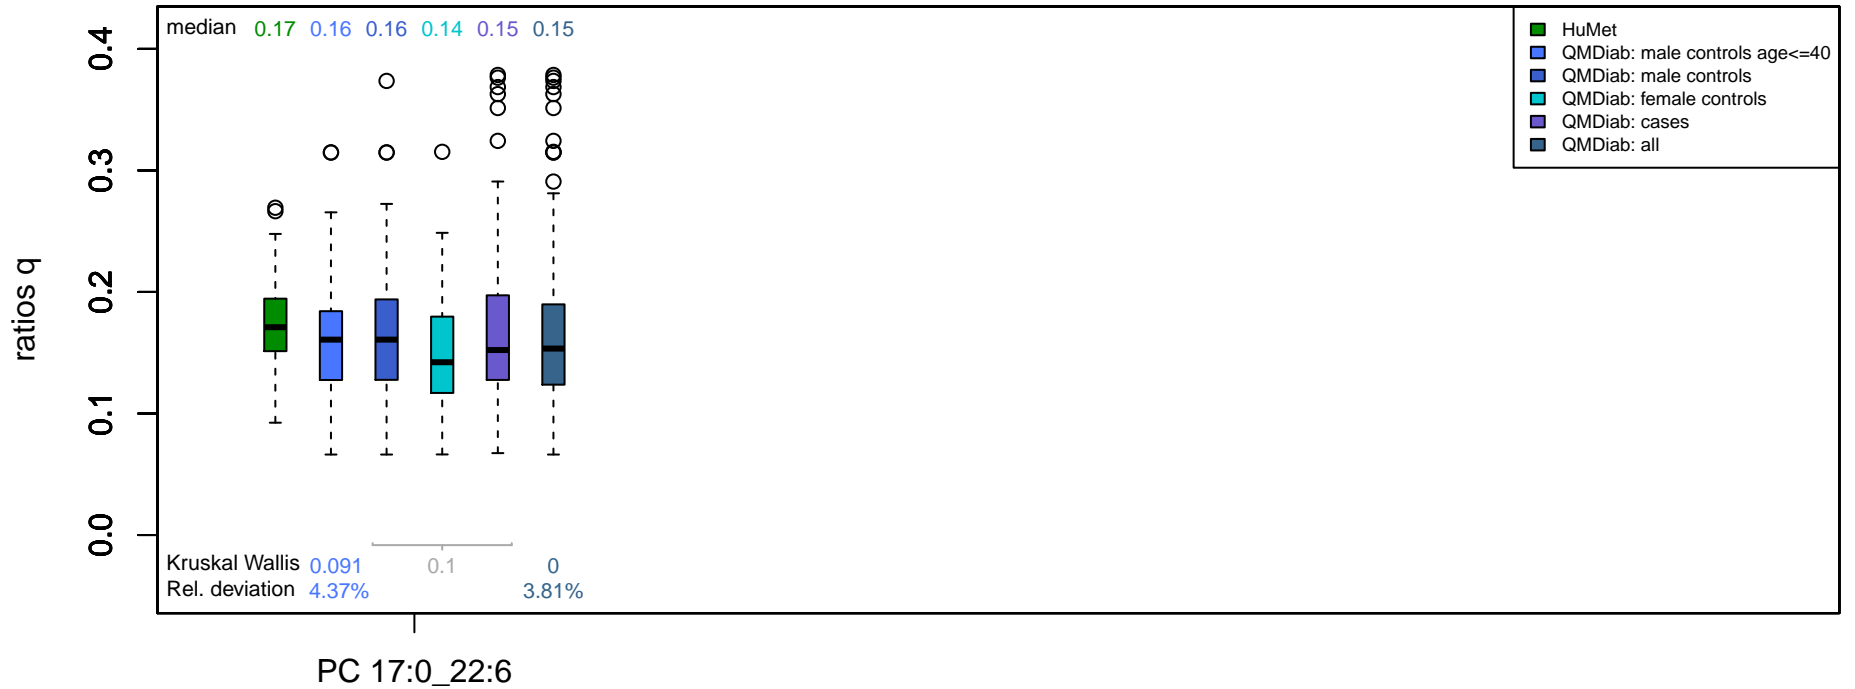

Supplement: s1 [file s1]
