# Supplementary material for: Characterization of Bulk Phosphatidylcholine Compositions in Human Plasma Using Side-Chain Resolving Lipidomics
Source: MDPI journal article supplement (doi:10.3390/metabo9060109), 2019-06-08
Supplement: s1 [file s1]

PC aa C28:1 = R

Qualitative composition

PC aa C28:1 consists of:  
PC 10:0\_18:1,    PC 12:0\_16:1,    PC 13:0\_15:1,    PC 14:0\_14:1,  
[13C1]SM 32:1  
and further compounds

No independent Variable measured.



PC aa C32:0 = PC 16:0\_16:0 + PC 18:0\_14:0 + R

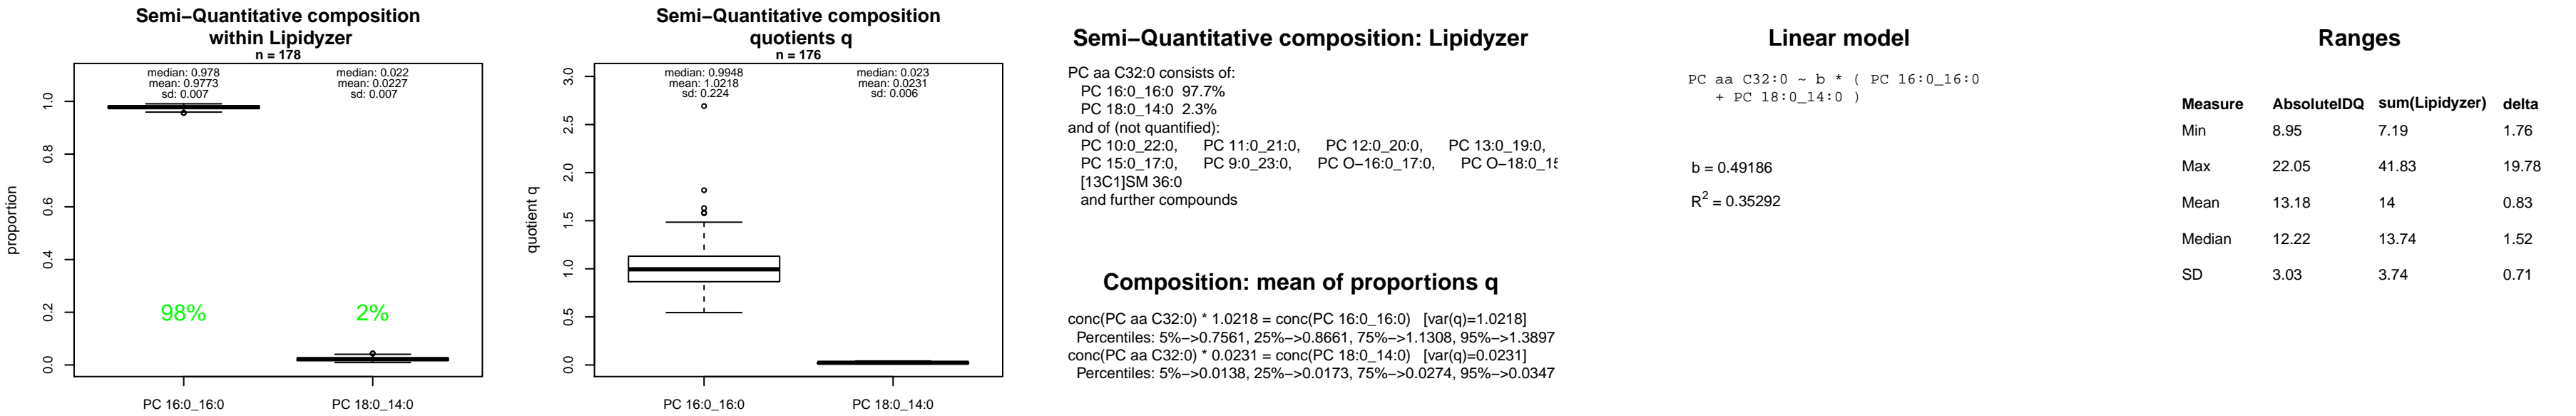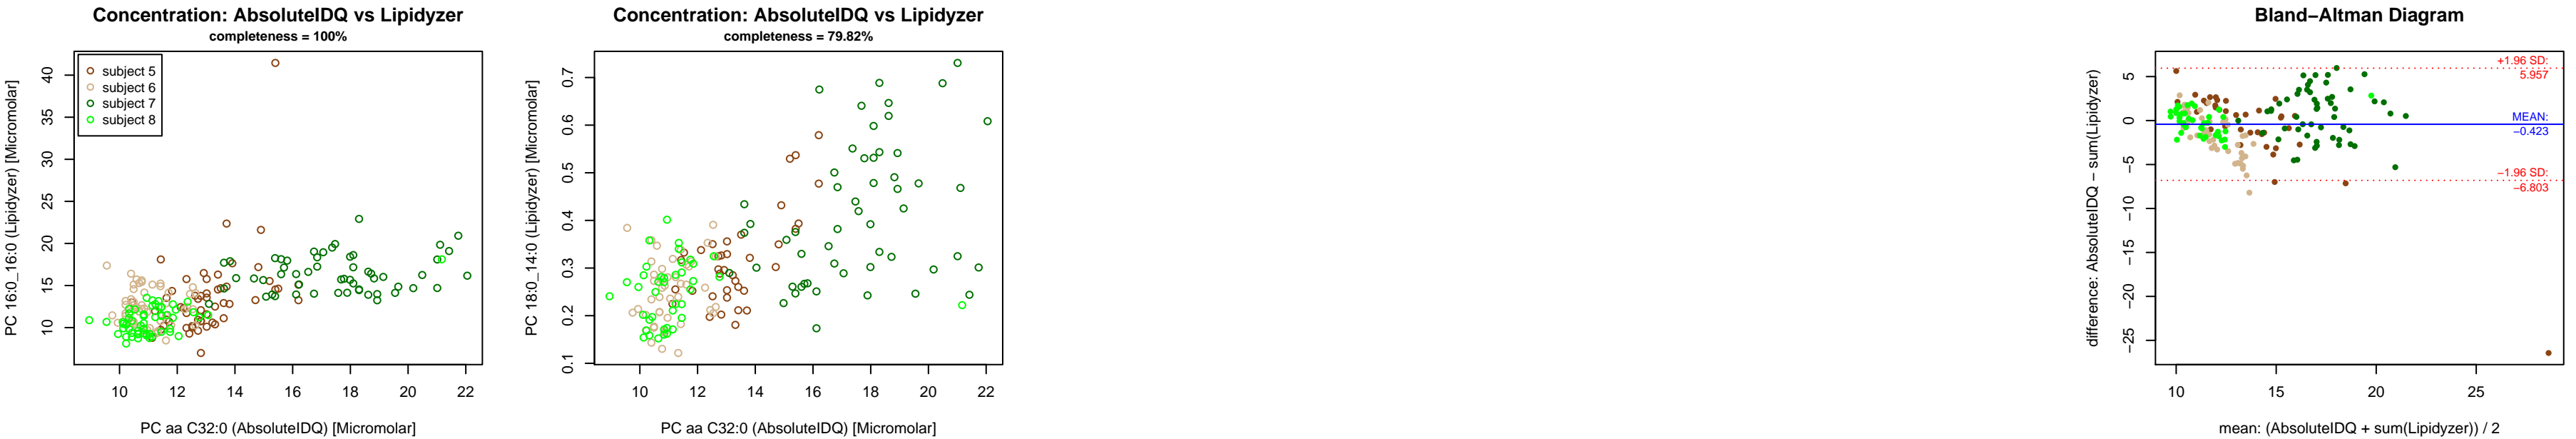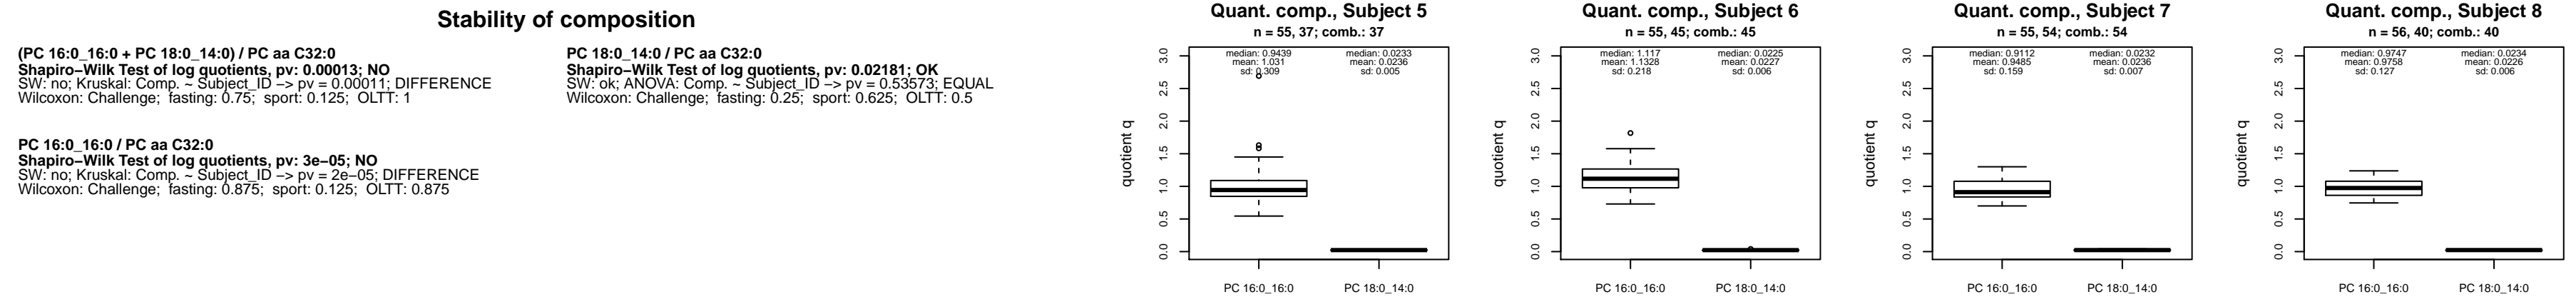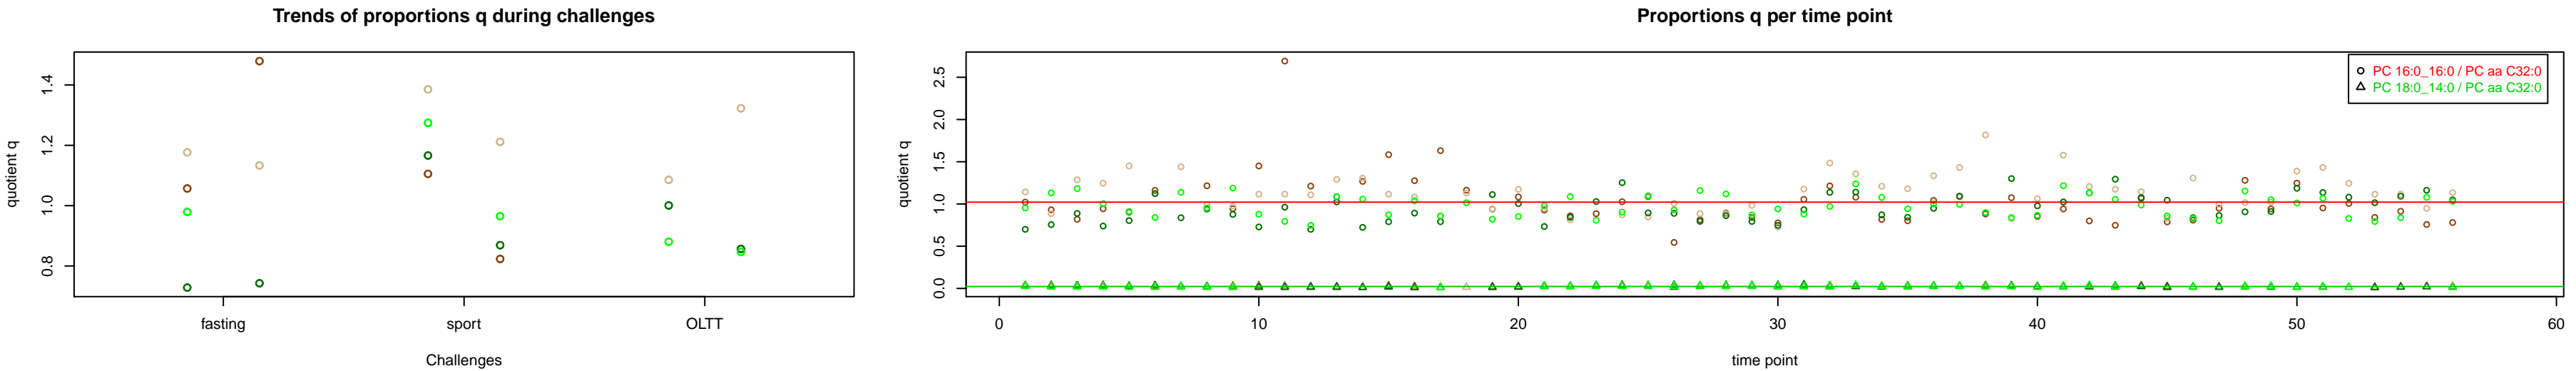

PC aa C32:1 = PC 14:0\_18:1 + PC 16:0\_16:1 + R

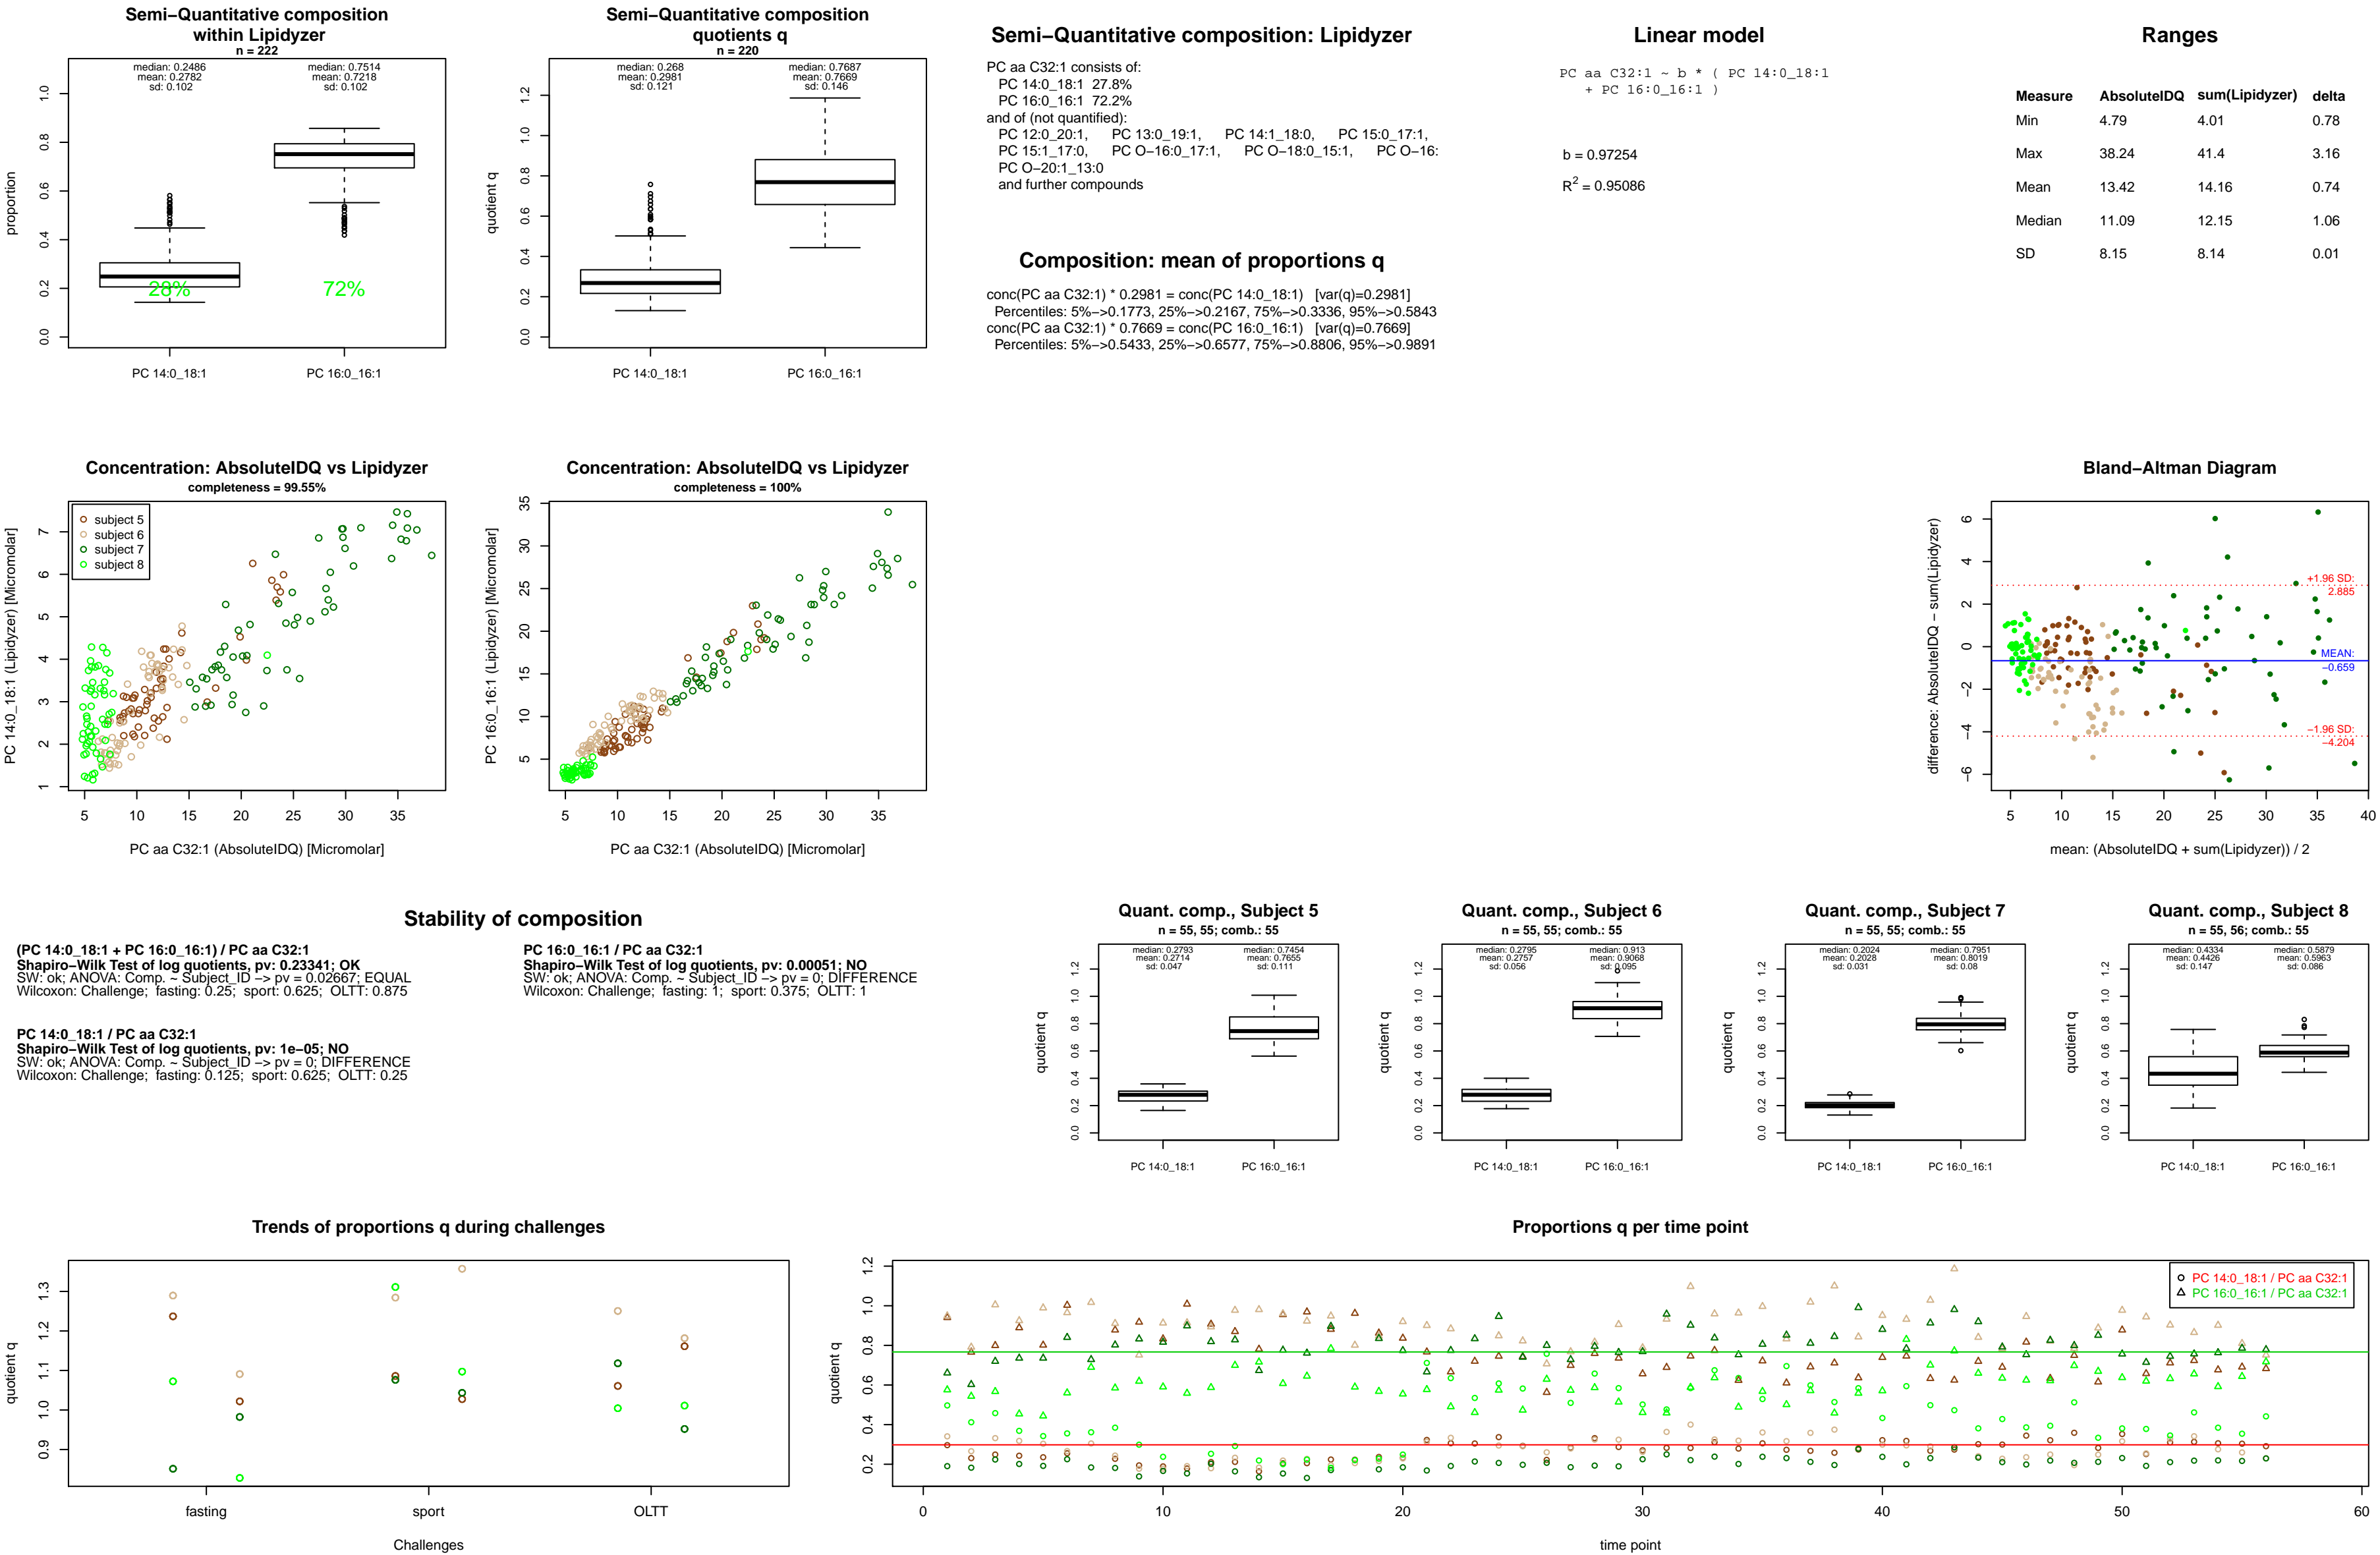

Bland-Altman Diagram

difference: AbsolutelDQ - sum(Lipidyzer)

mean: (AbsolutelDQ + sum(Lipidyzer)) / 2

+1.96 SD: 2.885

MEAN: -0.659

-1.96 SD: -4.204

Stability of composition

(PC 14:0\_18:1 + PC 16:0\_16:1) / PC aa C32:1  
Shapiro-Wilk Test of log quotients, pv: 0.23341; OK  
SW: ok; ANOVA: Comp. ~ Subject\_ID -> pv = 0.02667; EQUAL  
Wilcoxon: Challenge; fasting: 0.25; sport: 0.625; OLTT: 0.875

PC 14:0\_18:1 / PC aa C32:1  
Shapiro-Wilk Test of log quotients, pv: 1e-05; NO  
SW: ok; ANOVA: Comp. ~ Subject\_ID -> pv = 0; DIFFERENCE  
Wilcoxon: Challenge; fasting: 0.125; sport: 0.625; OLTT: 0.25

PC 16:0\_16:1 / PC aa C32:1  
Shapiro-Wilk Test of log quotients, pv: 0.00051; NO  
SW: ok; ANOVA: Comp. ~ Subject\_ID -> pv = 0; DIFFERENCE  
Wilcoxon: Challenge; fasting: 1; sport: 0.375; OLTT: 1

Quant. comp., Subject 5  
n = 55, 55; comb.: 55

median: 0.2793  
mean: 0.2714  
sd: 0.047

median: 0.7454  
mean: 0.7655  
sd: 0.111

Quant. comp., Subject 6  
n = 55, 55; comb.: 55

median: 0.2795  
mean: 0.2757  
sd: 0.056

median: 0.913  
mean: 0.9068  
sd: 0.095

Quant. comp., Subject 7  
n = 55, 55; comb.: 55

median: 0.2024  
mean: 0.2028  
sd: 0.031

median: 0.7951  
mean: 0.8019  
sd: 0.08

Quant. comp., Subject 8  
n = 55, 56; comb.: 55

median: 0.4334  
mean: 0.4426  
sd: 0.147

median: 0.5879  
mean: 0.5963  
sd: 0.086

Trends of proportions q during challenges

fasting sport OLTT

Challenges

Proportions q per time point

○ PC 14:0\_18:1 / PC aa C32:1  
△ PC 16:0\_16:1 / PC aa C32:1

time point

PC aa C32:2 = PC 14:0\_18:2 + R

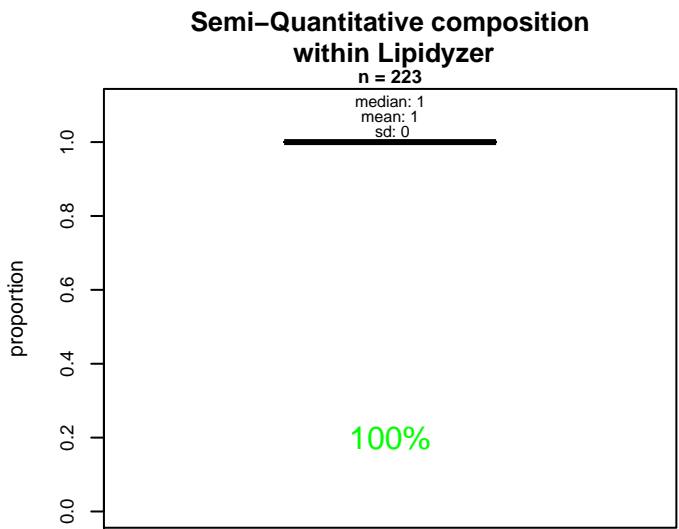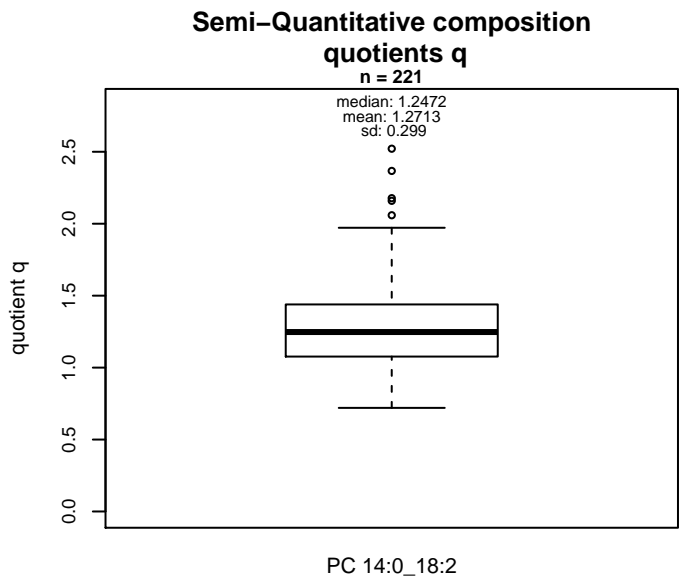

Semi-Quantitative composition: Lipidzyer

PC aa C32:2 consists of:  
PC 14:0\_18:2 100%  
and of (not quantified):  
PC 12:0\_20:2, PC 14:1\_18:1, PC 15:0\_17:2, PC 16:1\_16:1,  
PC 15:1\_17:1, PC O-16:0\_17:2, PC O-16:1\_17:1, PC O-18:  
and further compounds

Composition: mean of proportions q

conc(PC aa C32:2) \* 1.2713 = conc(PC 14:0\_18:2) [var(q)=1.2713]  
Percentiles: 5%→0.8229, 25%→1.0768, 75%→1.439, 95%→1.7371

Linear model

PC aa C32:2 ~ b \* ( PC 14:0\_18:2 )

b = 1.03115

R<sup>2</sup> = 0.78893

Ranges

| Measure | AbsoluteIDQ | sum(Lipidzyer) | delta |
|---------|-------------|----------------|-------|
| Min     | 0.66        | 1.23           | 0.56  |
| Max     | 5.99        | 6.04           | 0.05  |
| Mean    | 2.55        | 2.99           | 0.43  |
| Median  | 2.32        | 2.77           | 0.45  |
| SD      | 1.27        | 1.09           | 0.18  |

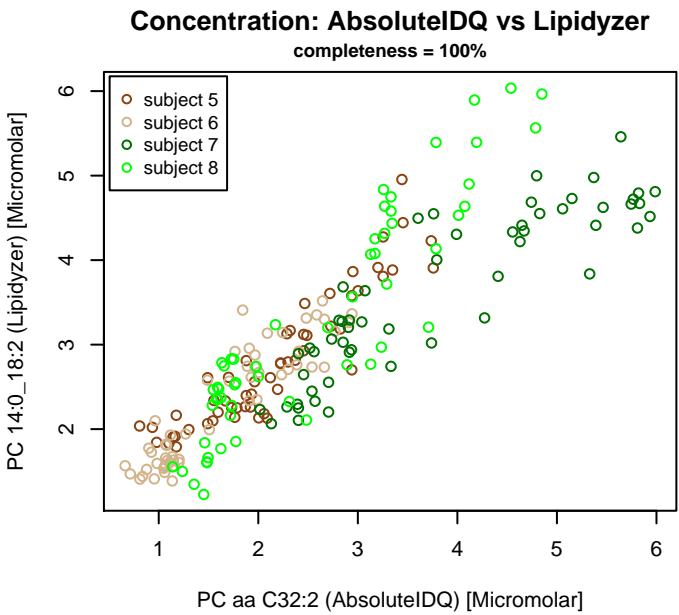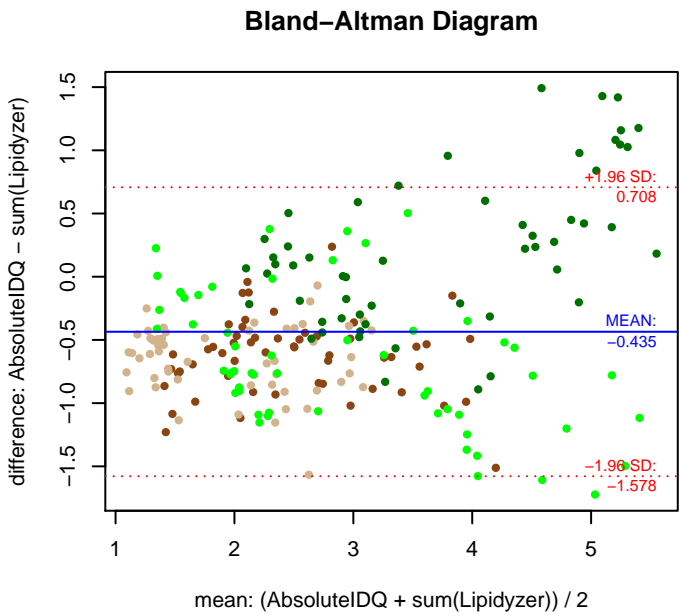

Stability of composition

PC 14:0\_18:2 / PC aa C32:2  
Shapiro-Wilk Test of log quotients, pv: 0.28199; OK  
SW: no; Kruskal: Comp. ~ Subject\_ID -> pv = 0; DIFFERENCE  
Wilcoxon: Challenge; fasting: 0.875; sport: 0.875; OLT: 0.25

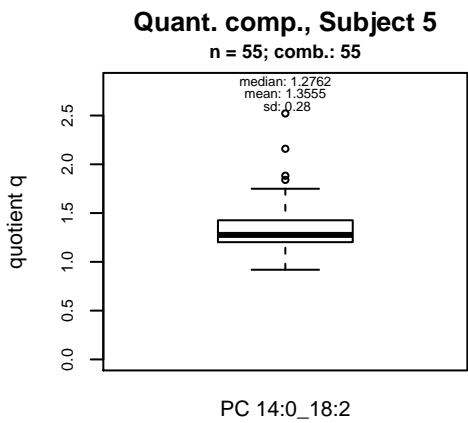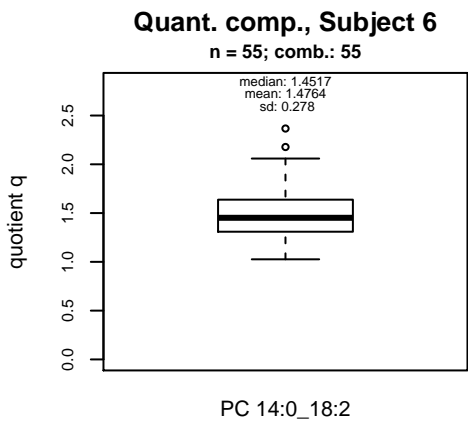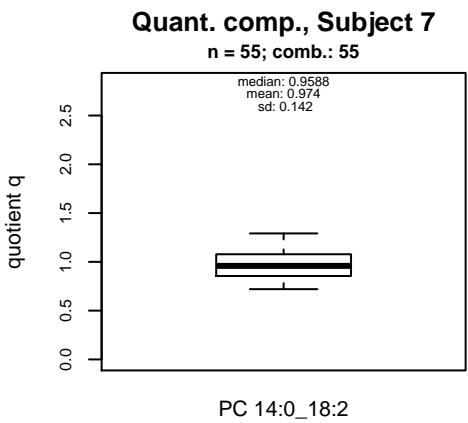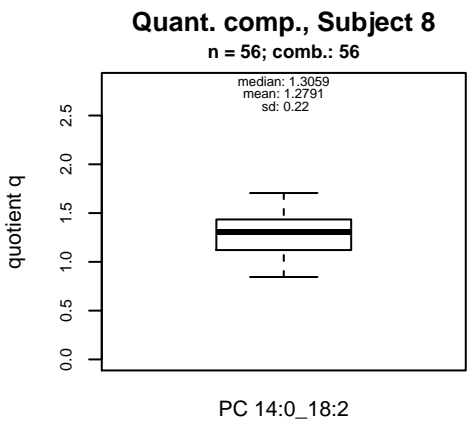

Trends of proportions q during challenges

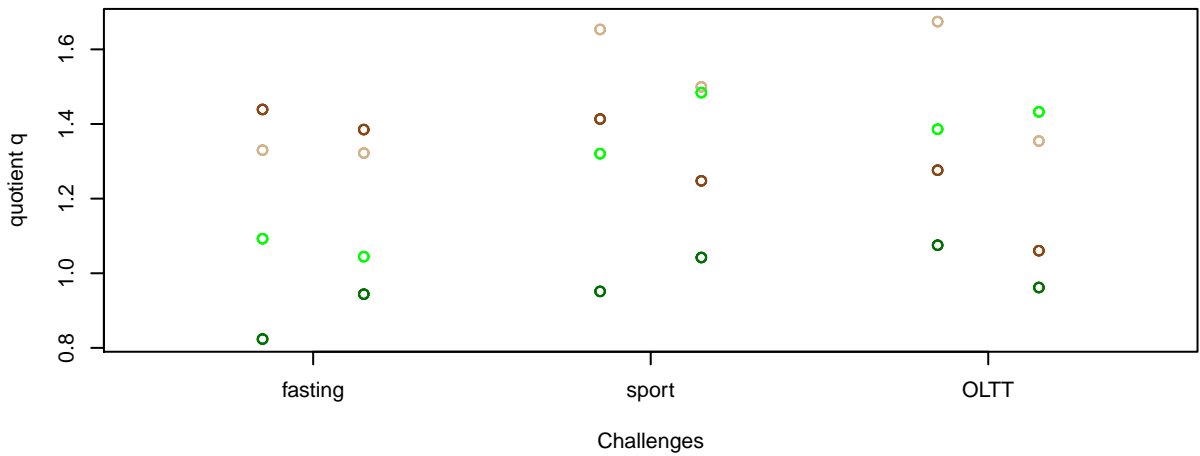

Proportions q per time point

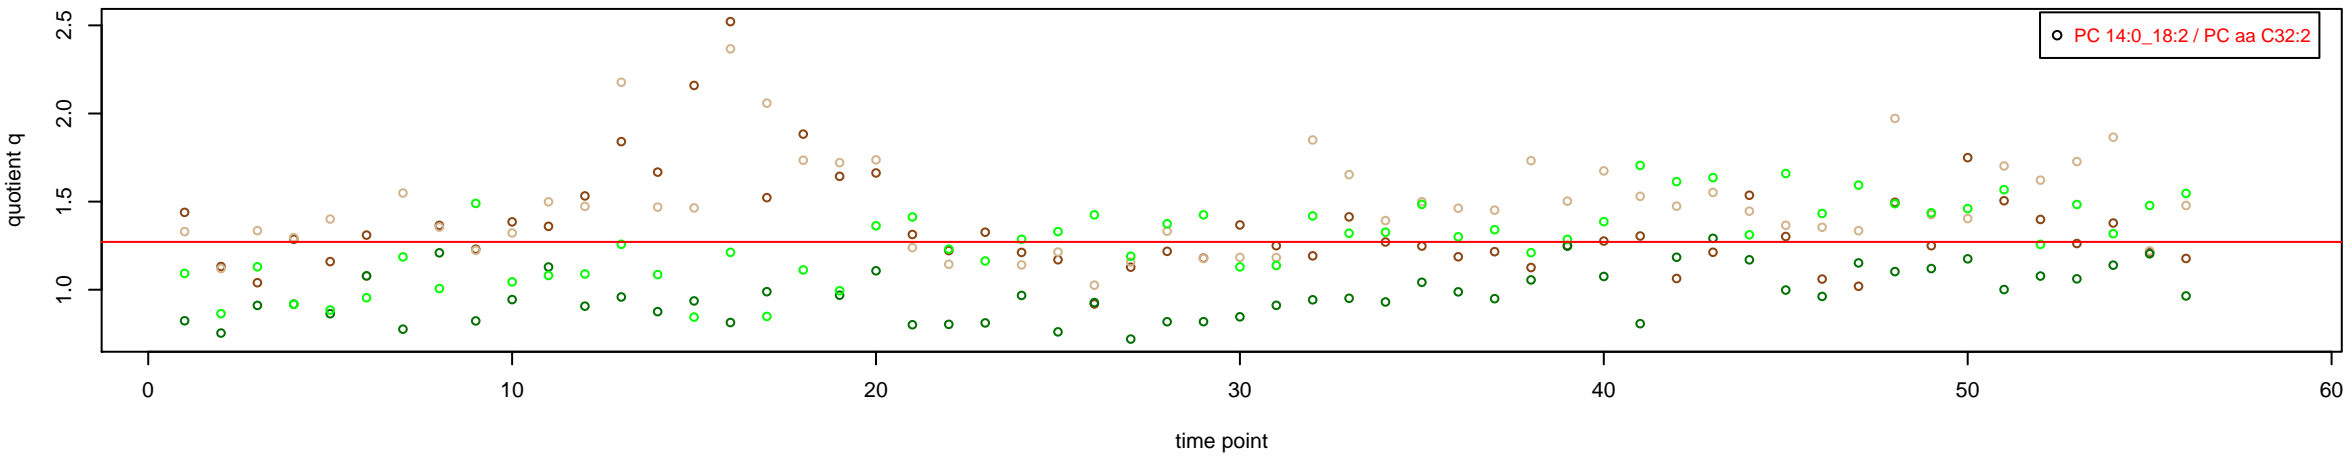

PC aa C32:3 = PC 14:0\_18:3 + R

PC 14:0\_18:3 excluded because of missingness > 75%

Qualitative composition

PC aa C32:3 consists of:  
PC 14:0\_18:3,    PC 12:0\_20:3,    PC 14:1\_18:2,    PC 15:1\_17:2,  
[13C1]SM 36:3  
and further compounds

No independent Variable with  
coverage >0.25 out of PC 14:0\_18:3



**PC aa C34:1 = PC 14:0\_20:1 + PC 16:0\_18:1 + PC 18:0\_16:1 + PC 20:0\_14:1 + R**

PC 14:0\_20:1 excluded because of missingness > 75%

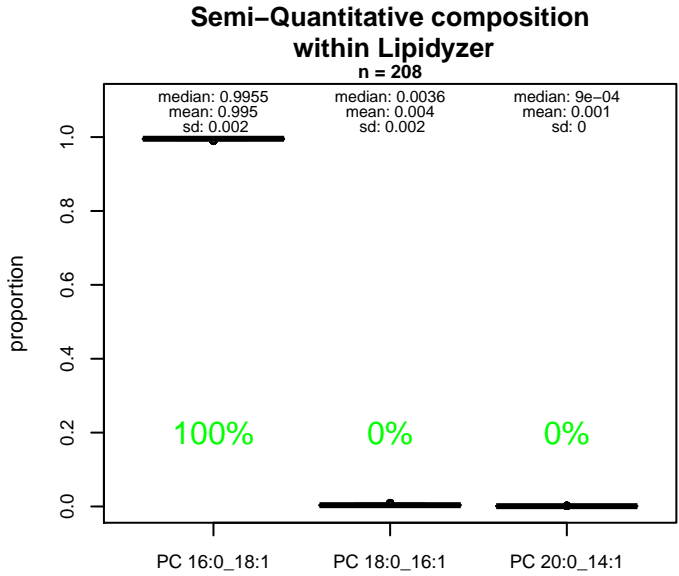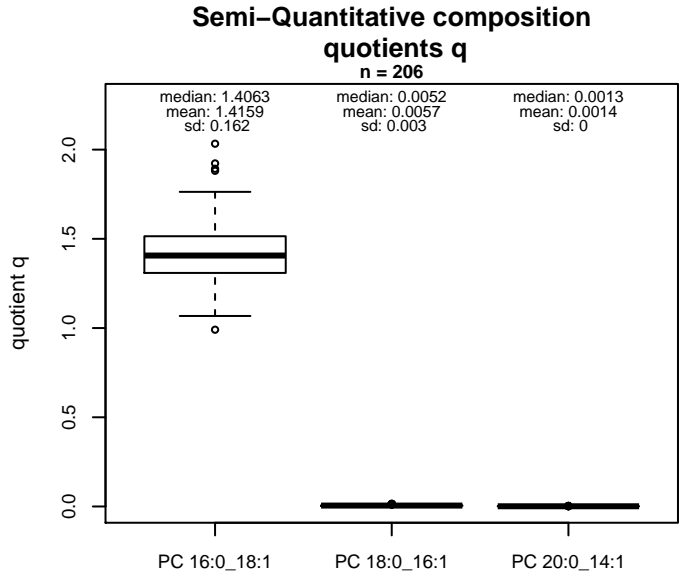

**Semi-Quantitative composition: Lipidzyer**

PC aa C34:1 consists of:  
PC 16:0\_18:1 99.5%  
PC 18:0\_16:1 0.4%  
PC 20:0\_14:1 0.1%  
and of (not quantified):  
PC 14:0\_20:1, PC 12:0\_22:1, PC 14:1\_20:0, PC 15:0\_19:1,  
PC 15:1\_19:0, PC 17:0\_17:1, PC O-17:0\_18:1, PC O-16:0\_1  
PC O-18:0\_17:1, PC O-20:0\_15:1, PC O-16:1\_19:0, PC O-  
[13C1]SM 38:1  
and further compounds

**Composition: mean of proportions q**

conc(PC aa C34:1) \* 1.4159 = conc(PC 16:0\_18:1) [var(q)=1.4159]  
Percentiles: 5%-->1.1793, 25%-->1.3089, 75%-->1.5146, 95%-->1.6821  
conc(PC aa C34:1) \* 0.0057 = conc(PC 18:0\_16:1) [var(q)=0.0057]  
Percentiles: 5%-->0.0028, 25%-->0.0036, 75%-->0.0067, 95%-->0.012  
conc(PC aa C34:1) \* 0.0014 = conc(PC 20:0\_14:1) [var(q)=0.0014]  
Percentiles: 5%-->9e-04, 25%-->0.0011, 75%-->0.0016, 95%-->0.0022

**Linear model**

PC aa C34:1 ~ b \* ( PC 16:0\_18:1  
+ PC 18:0\_16:1  
+ PC 20:0\_14:1 )  
  
b = 0.55441  
R<sup>2</sup> = 0.86597

**Ranges**

| Measure | AbsoluteIDQ | sum(Lipidzyer) | delta  |
|---------|-------------|----------------|--------|
| Min     | 89.8        | 127.65         | 37.85  |
| Max     | 325.5       | 471.26         | 145.76 |
| Mean    | 187.14      | 268.99         | 81.85  |
| Median  | 183.6       | 261.66         | 78.06  |
| SD      | 49.04       | 84.03          | 35     |

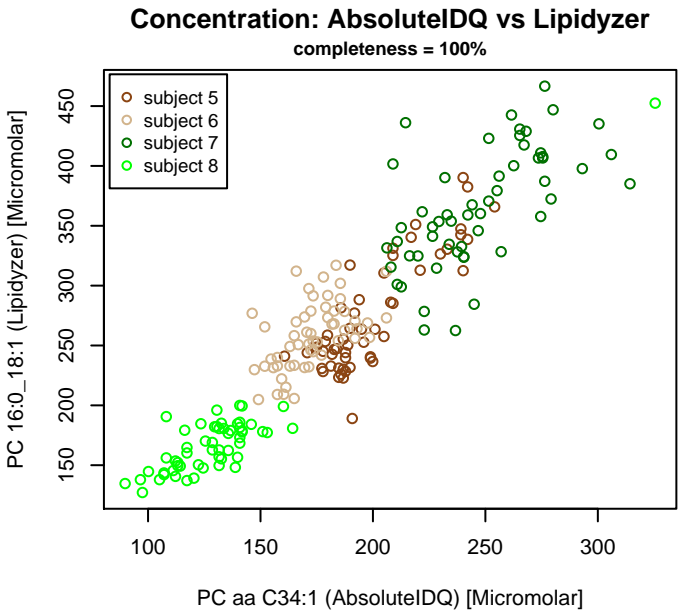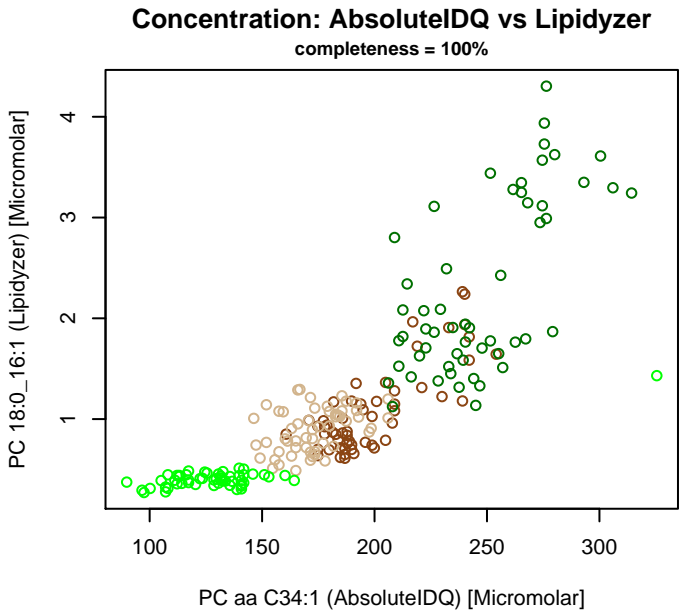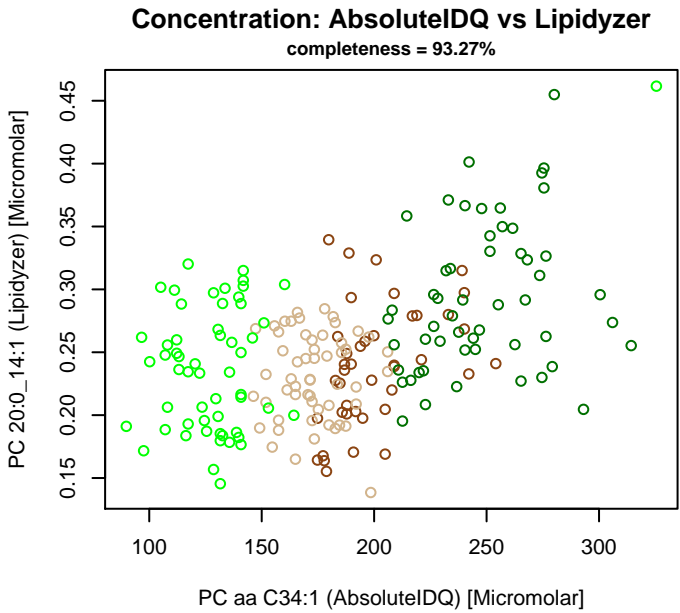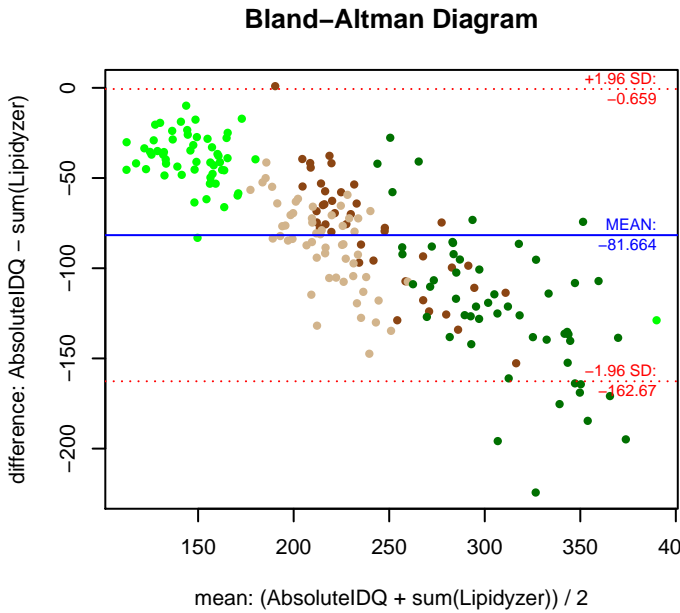

**Stability of composition**

(PC 16:0\_18:1 + PC 18:0\_16:1 + PC 20:0\_14:1) / PC aa C34:1  
**Shapiro-Wilk Test of log quotients, pv: 0.82819; OK**  
SW: ok; ANOVA: Comp. ~ Subject\_ID -> pv = 0.00213; DIFFERENCE  
Wilcoxon: Challenge; fasting: 0.75; sport: 0.125; OLTT: 1

PC 16:0\_18:1 / PC aa C34:1  
**Shapiro-Wilk Test of log quotients, pv: 0.85563; OK**  
SW: ok; ANOVA: Comp. ~ Subject\_ID -> pv = 0.02562; EQUAL  
Wilcoxon: Challenge; fasting: 0.625; sport: 0.125; OLTT: 1

PC 18:0\_16:1 / PC aa C34:1  
**Shapiro-Wilk Test of log quotients, pv: 0.00069; NO**  
SW: ok; ANOVA: Comp. ~ Subject\_ID -> pv = 0.00029; DIFFERENCE  
Wilcoxon: Challenge; fasting: 0.125; sport: 0.25; OLTT: 0.125

PC 20:0\_14:1 / PC aa C34:1  
**Shapiro-Wilk Test of log quotients, pv: 0.01446; OK**  
SW: ok; ANOVA: Comp. ~ Subject\_ID -> pv = 0; DIFFERENCE  
Wilcoxon: Challenge; fasting: 0.75; sport: 0.625; OLTT: 1

**Quant. comp., Subject 5**

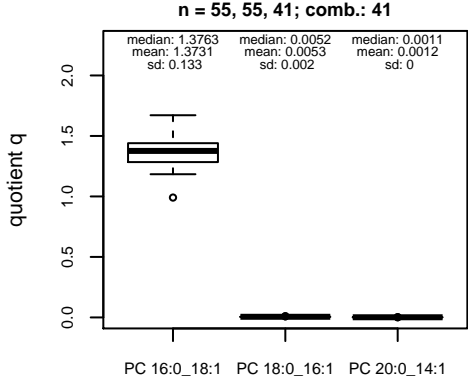

**Quant. comp., Subject 6**

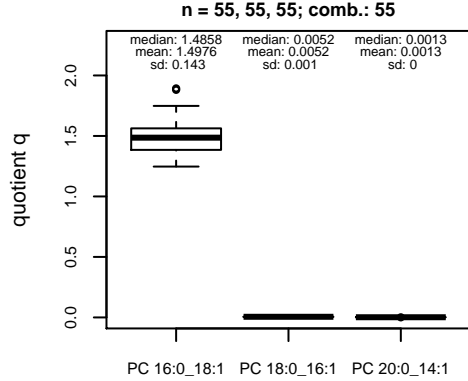

**Quant. comp., Subject 7**

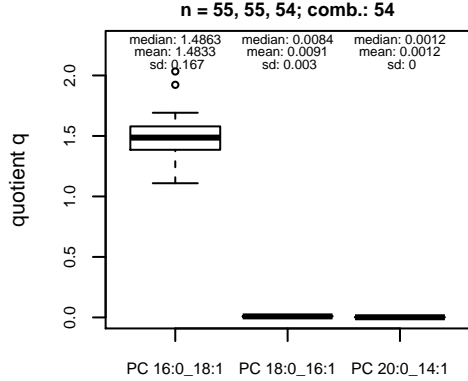

**Quant. comp., Subject 8**

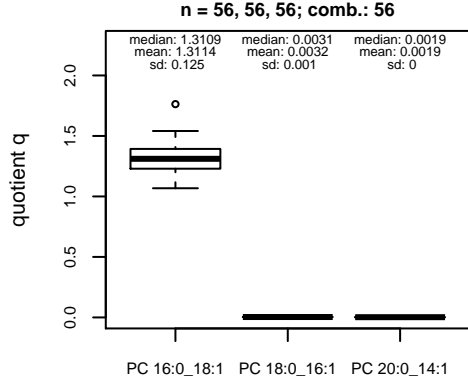

**Trends of proportions q during challenges**

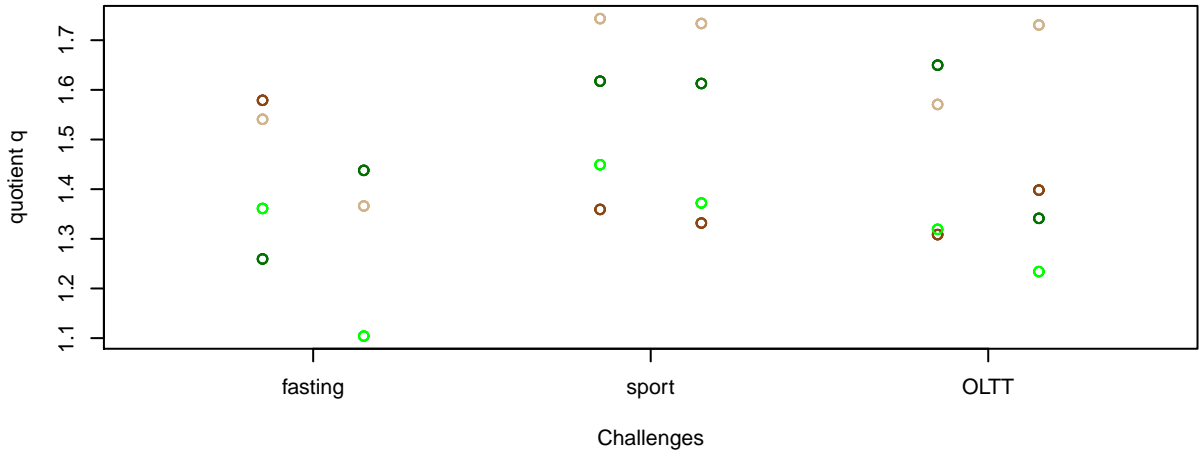

**Proportions q per time point**

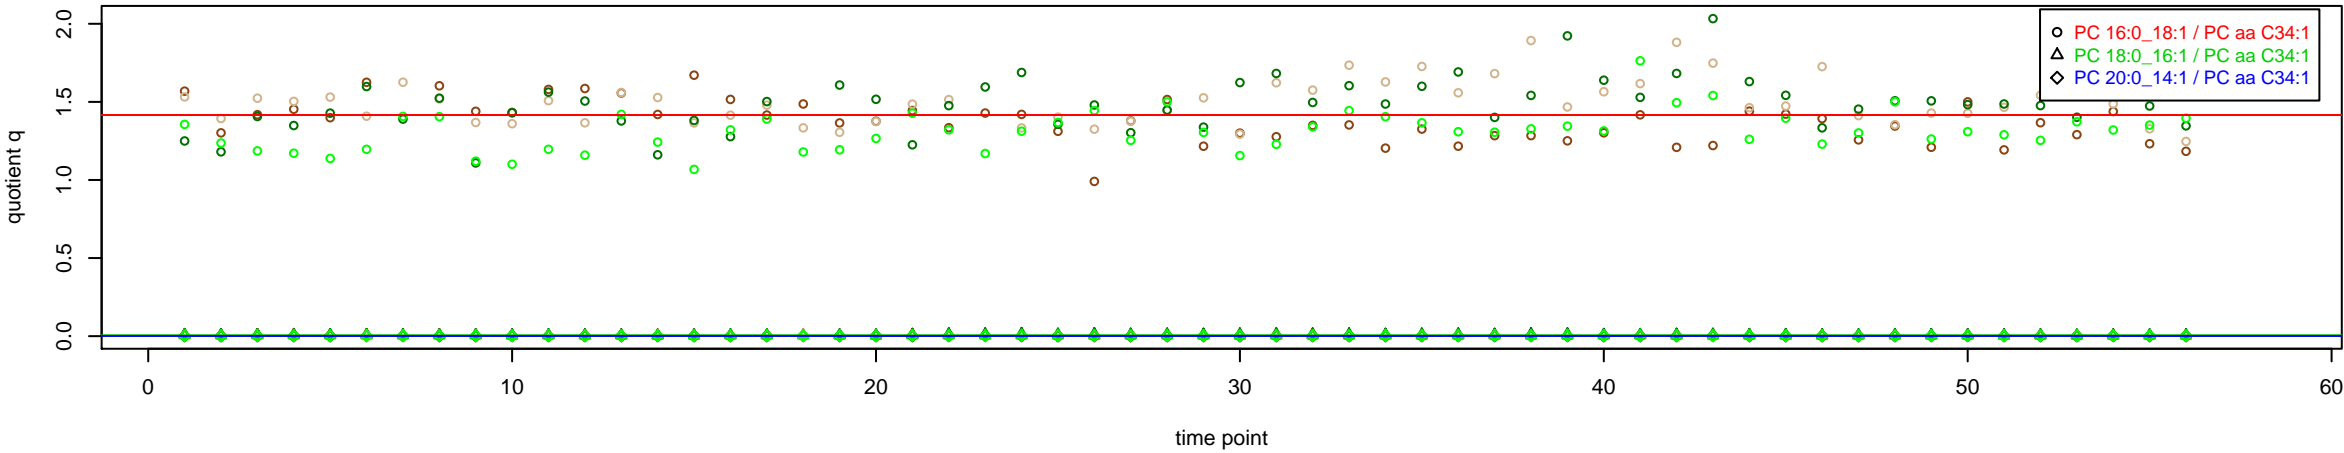

$$\text{PC aa C34:2} = \text{PC 14:0\_20:2} + \text{PC 16:0\_18:2} + \text{PC 18:1\_16:1} + \text{R}$$

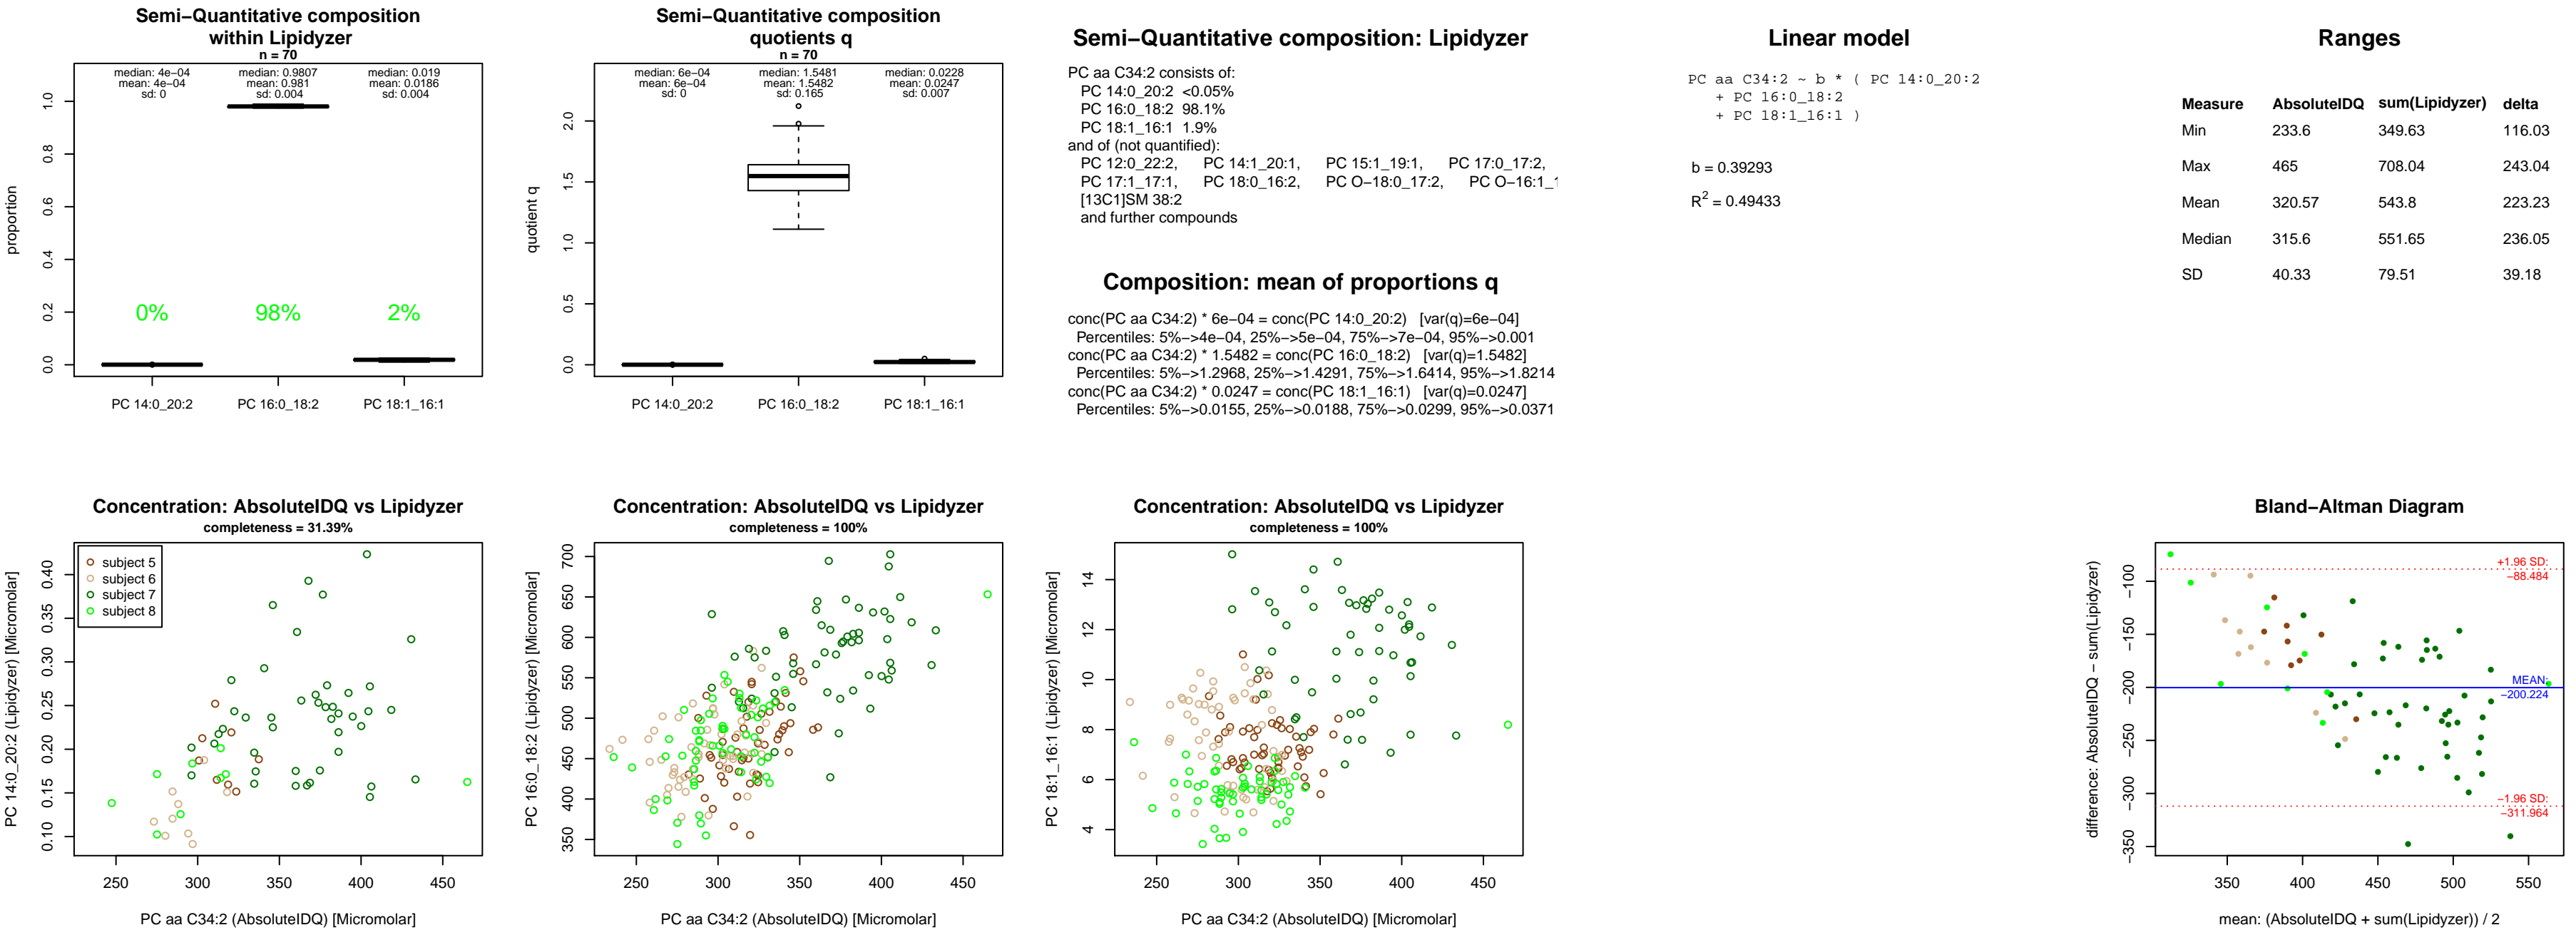

Stability of composition

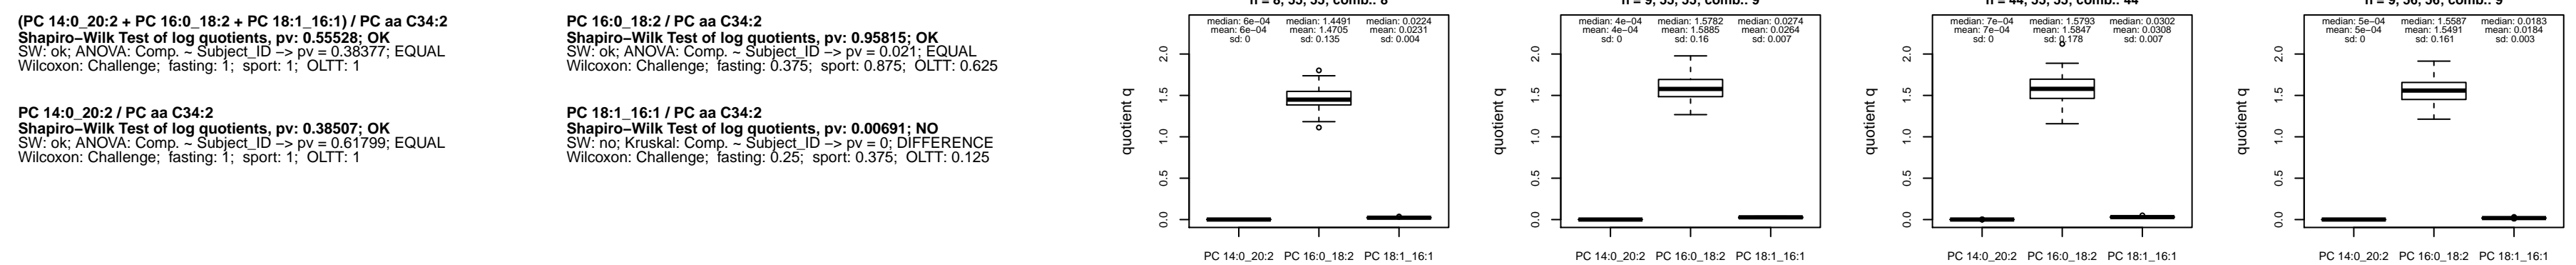

Trends of proportions q during challenges

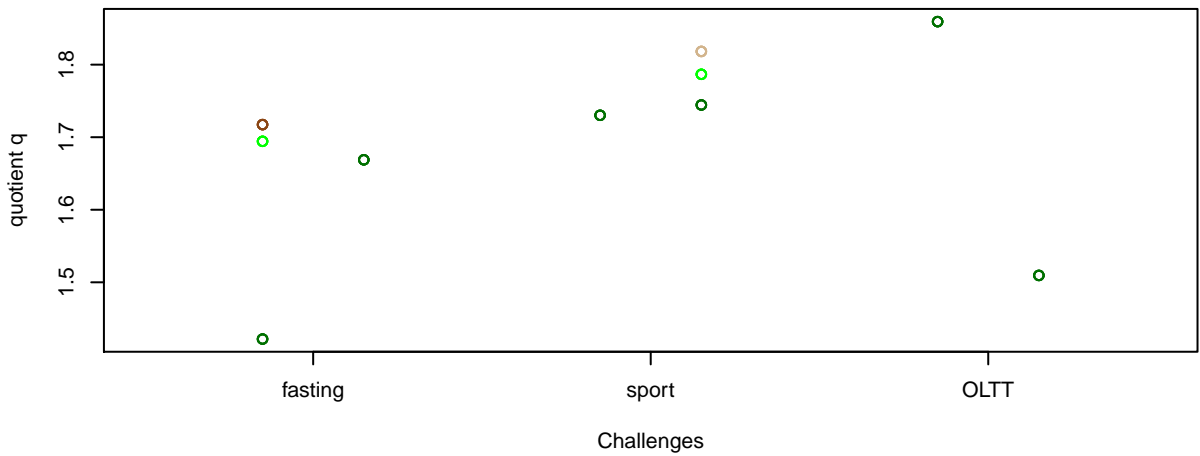

Proportions q per time point

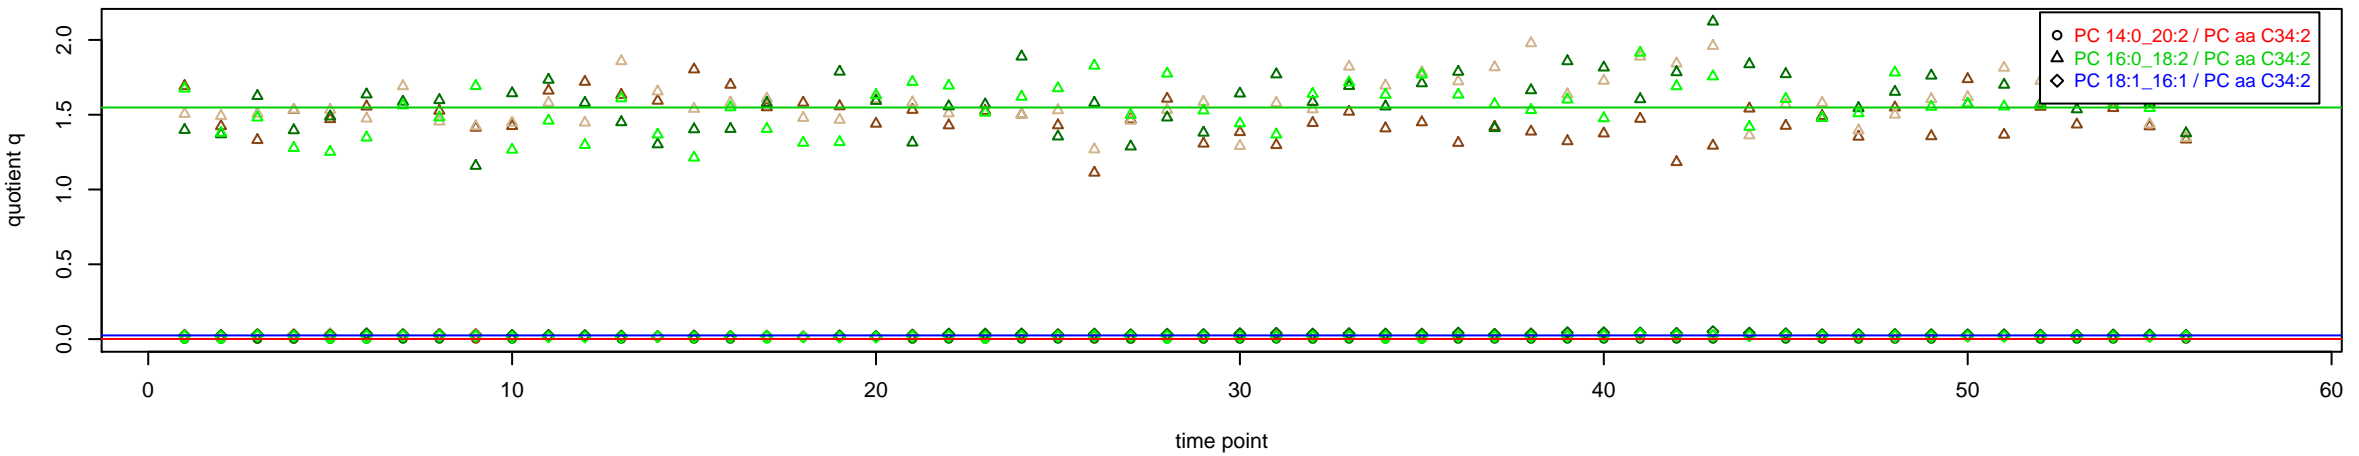



$$\text{PC aa C34:3} = \text{PC 14:0\_20:3} + \text{PC 16:0\_18:3} + \text{PC 18:2\_16:1} + \text{R}$$

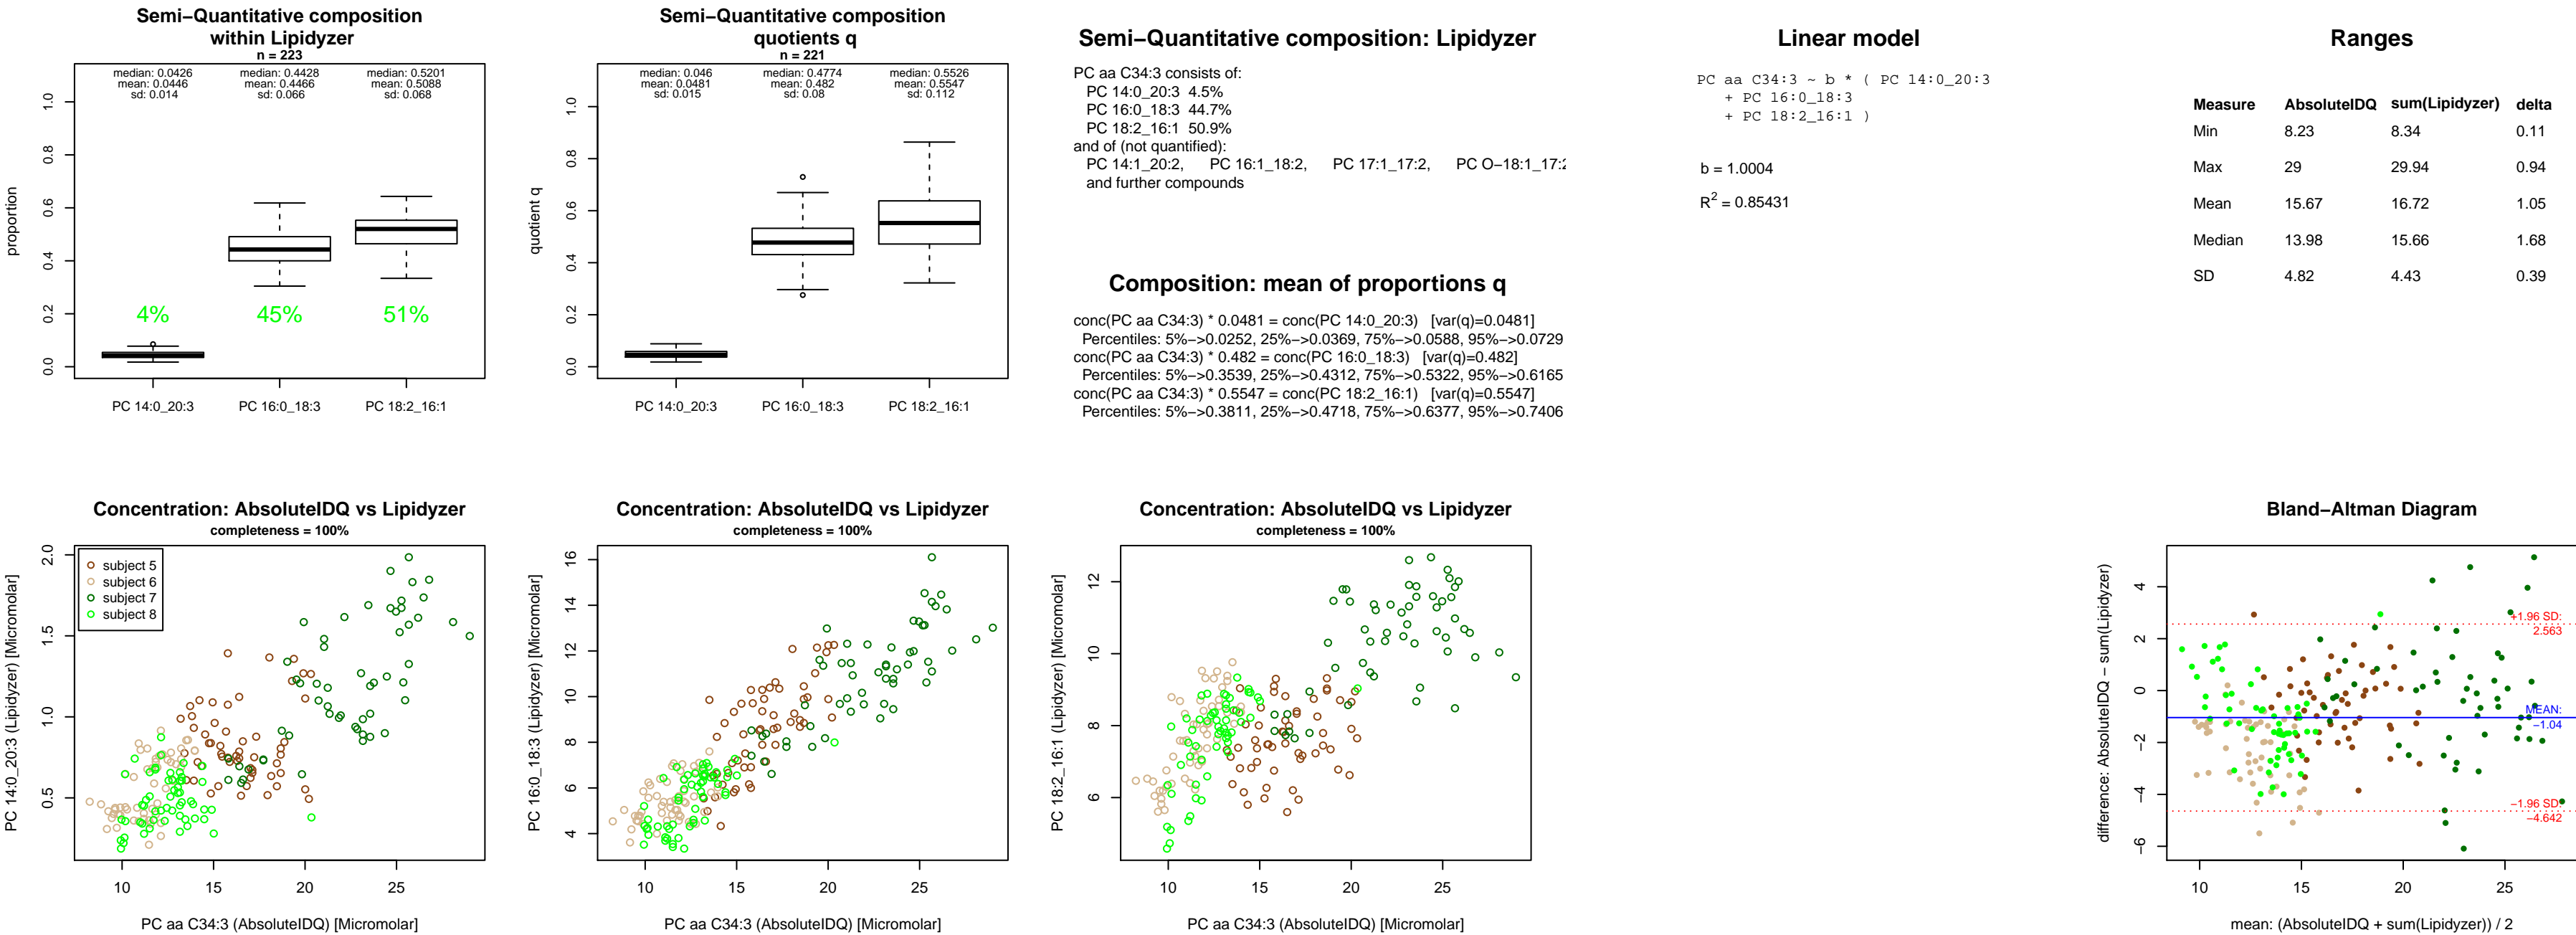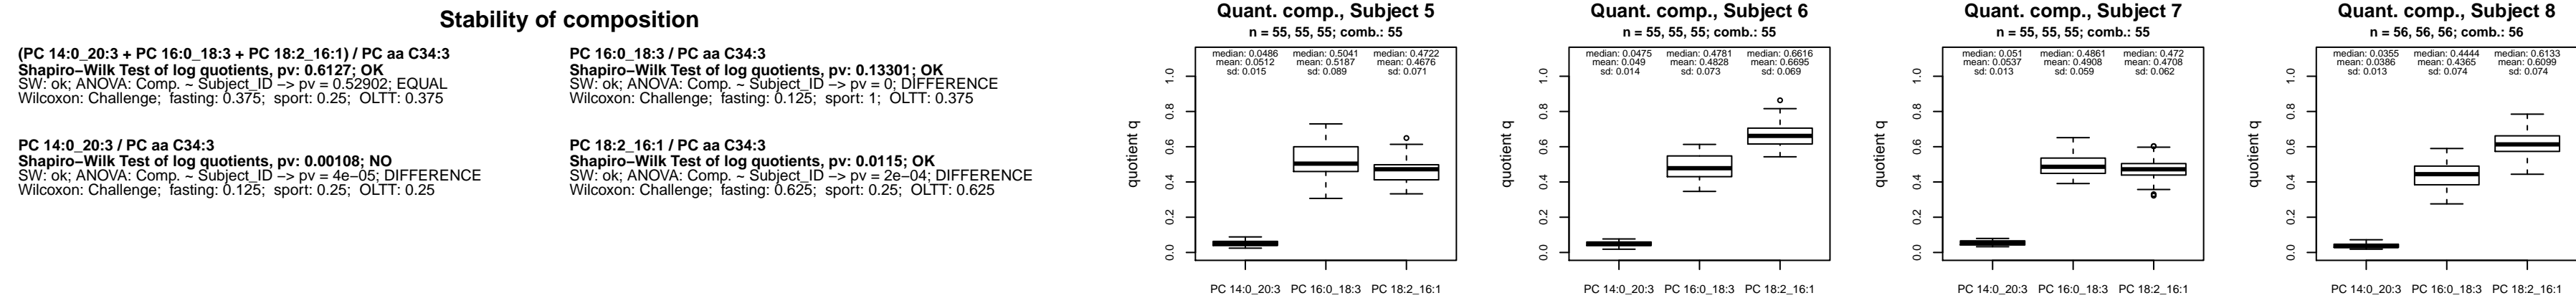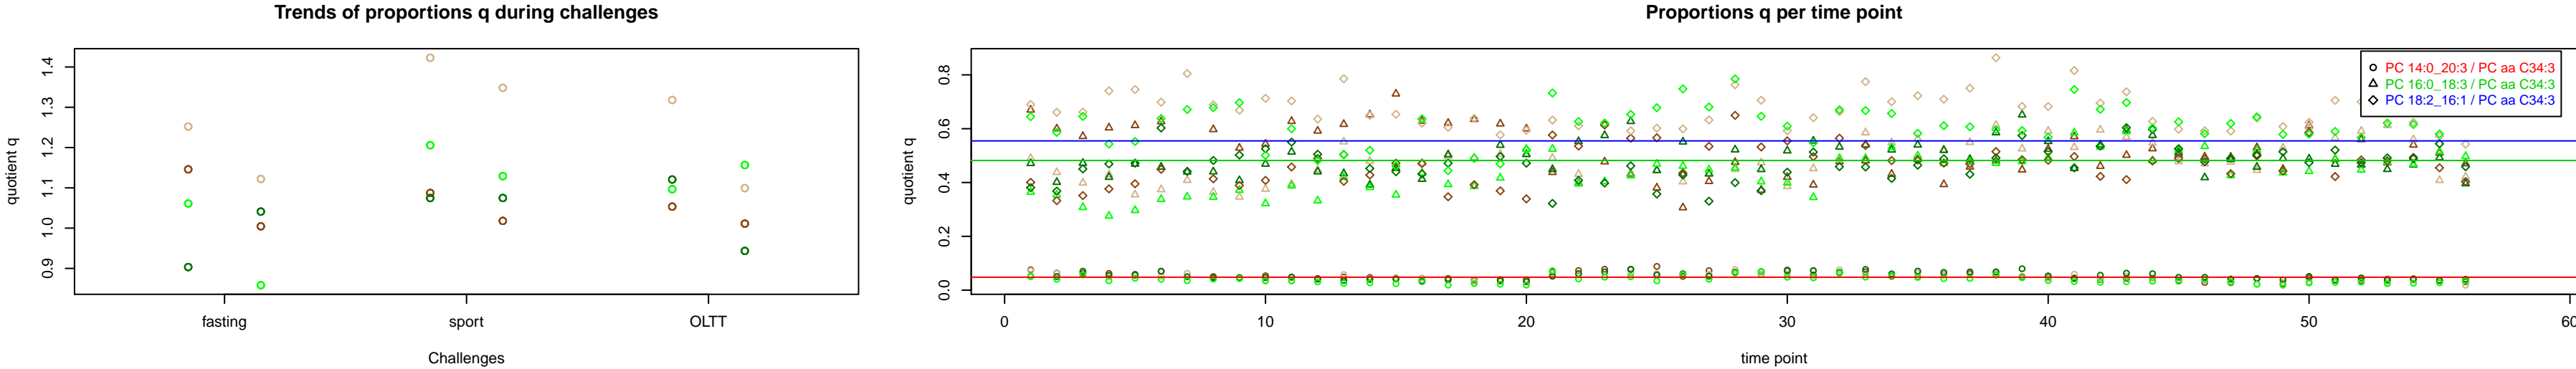

PC aa C34:4 = PC 14:0\_20:4 + PC 16:0\_18:4 + R

PC 16:0\_18:4 excluded because of missingness > 75%

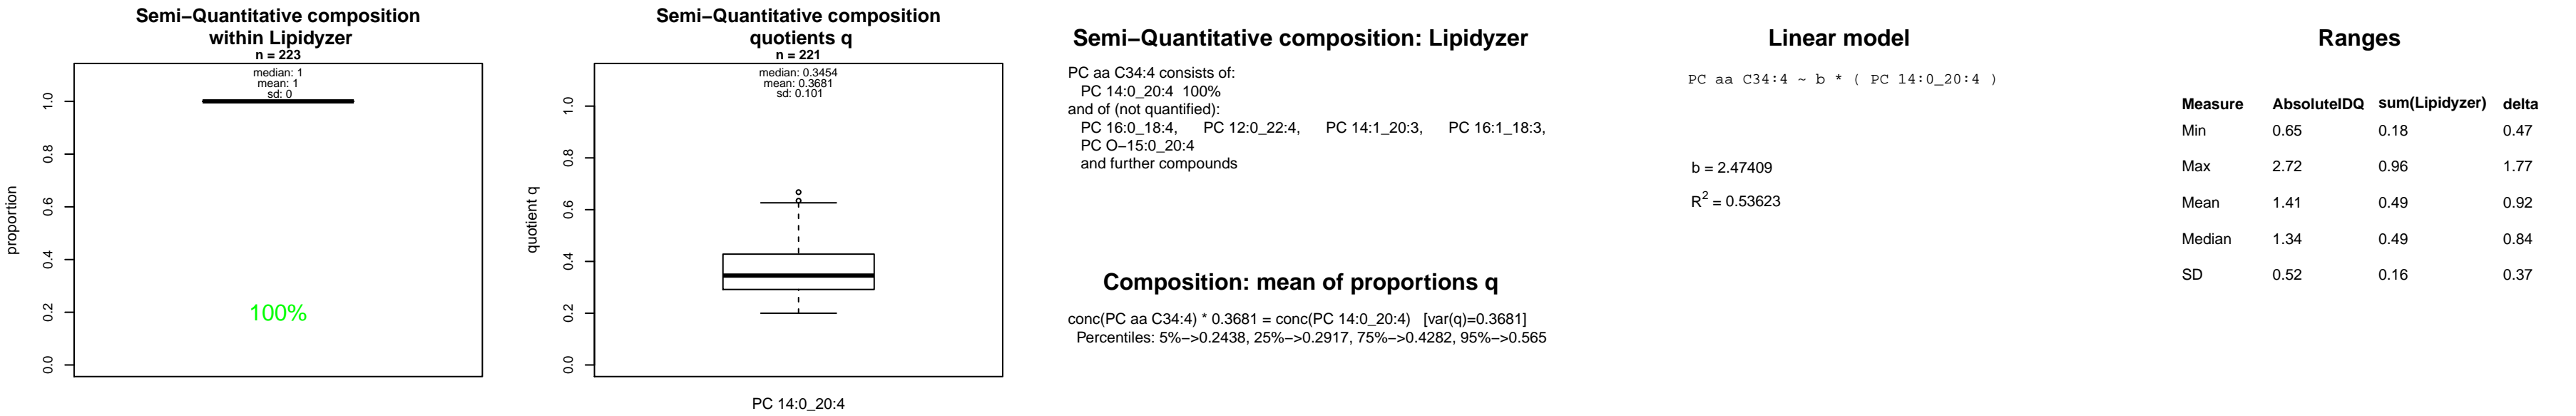

PC aa C36:0 = PC 18:0\_18:0 + R

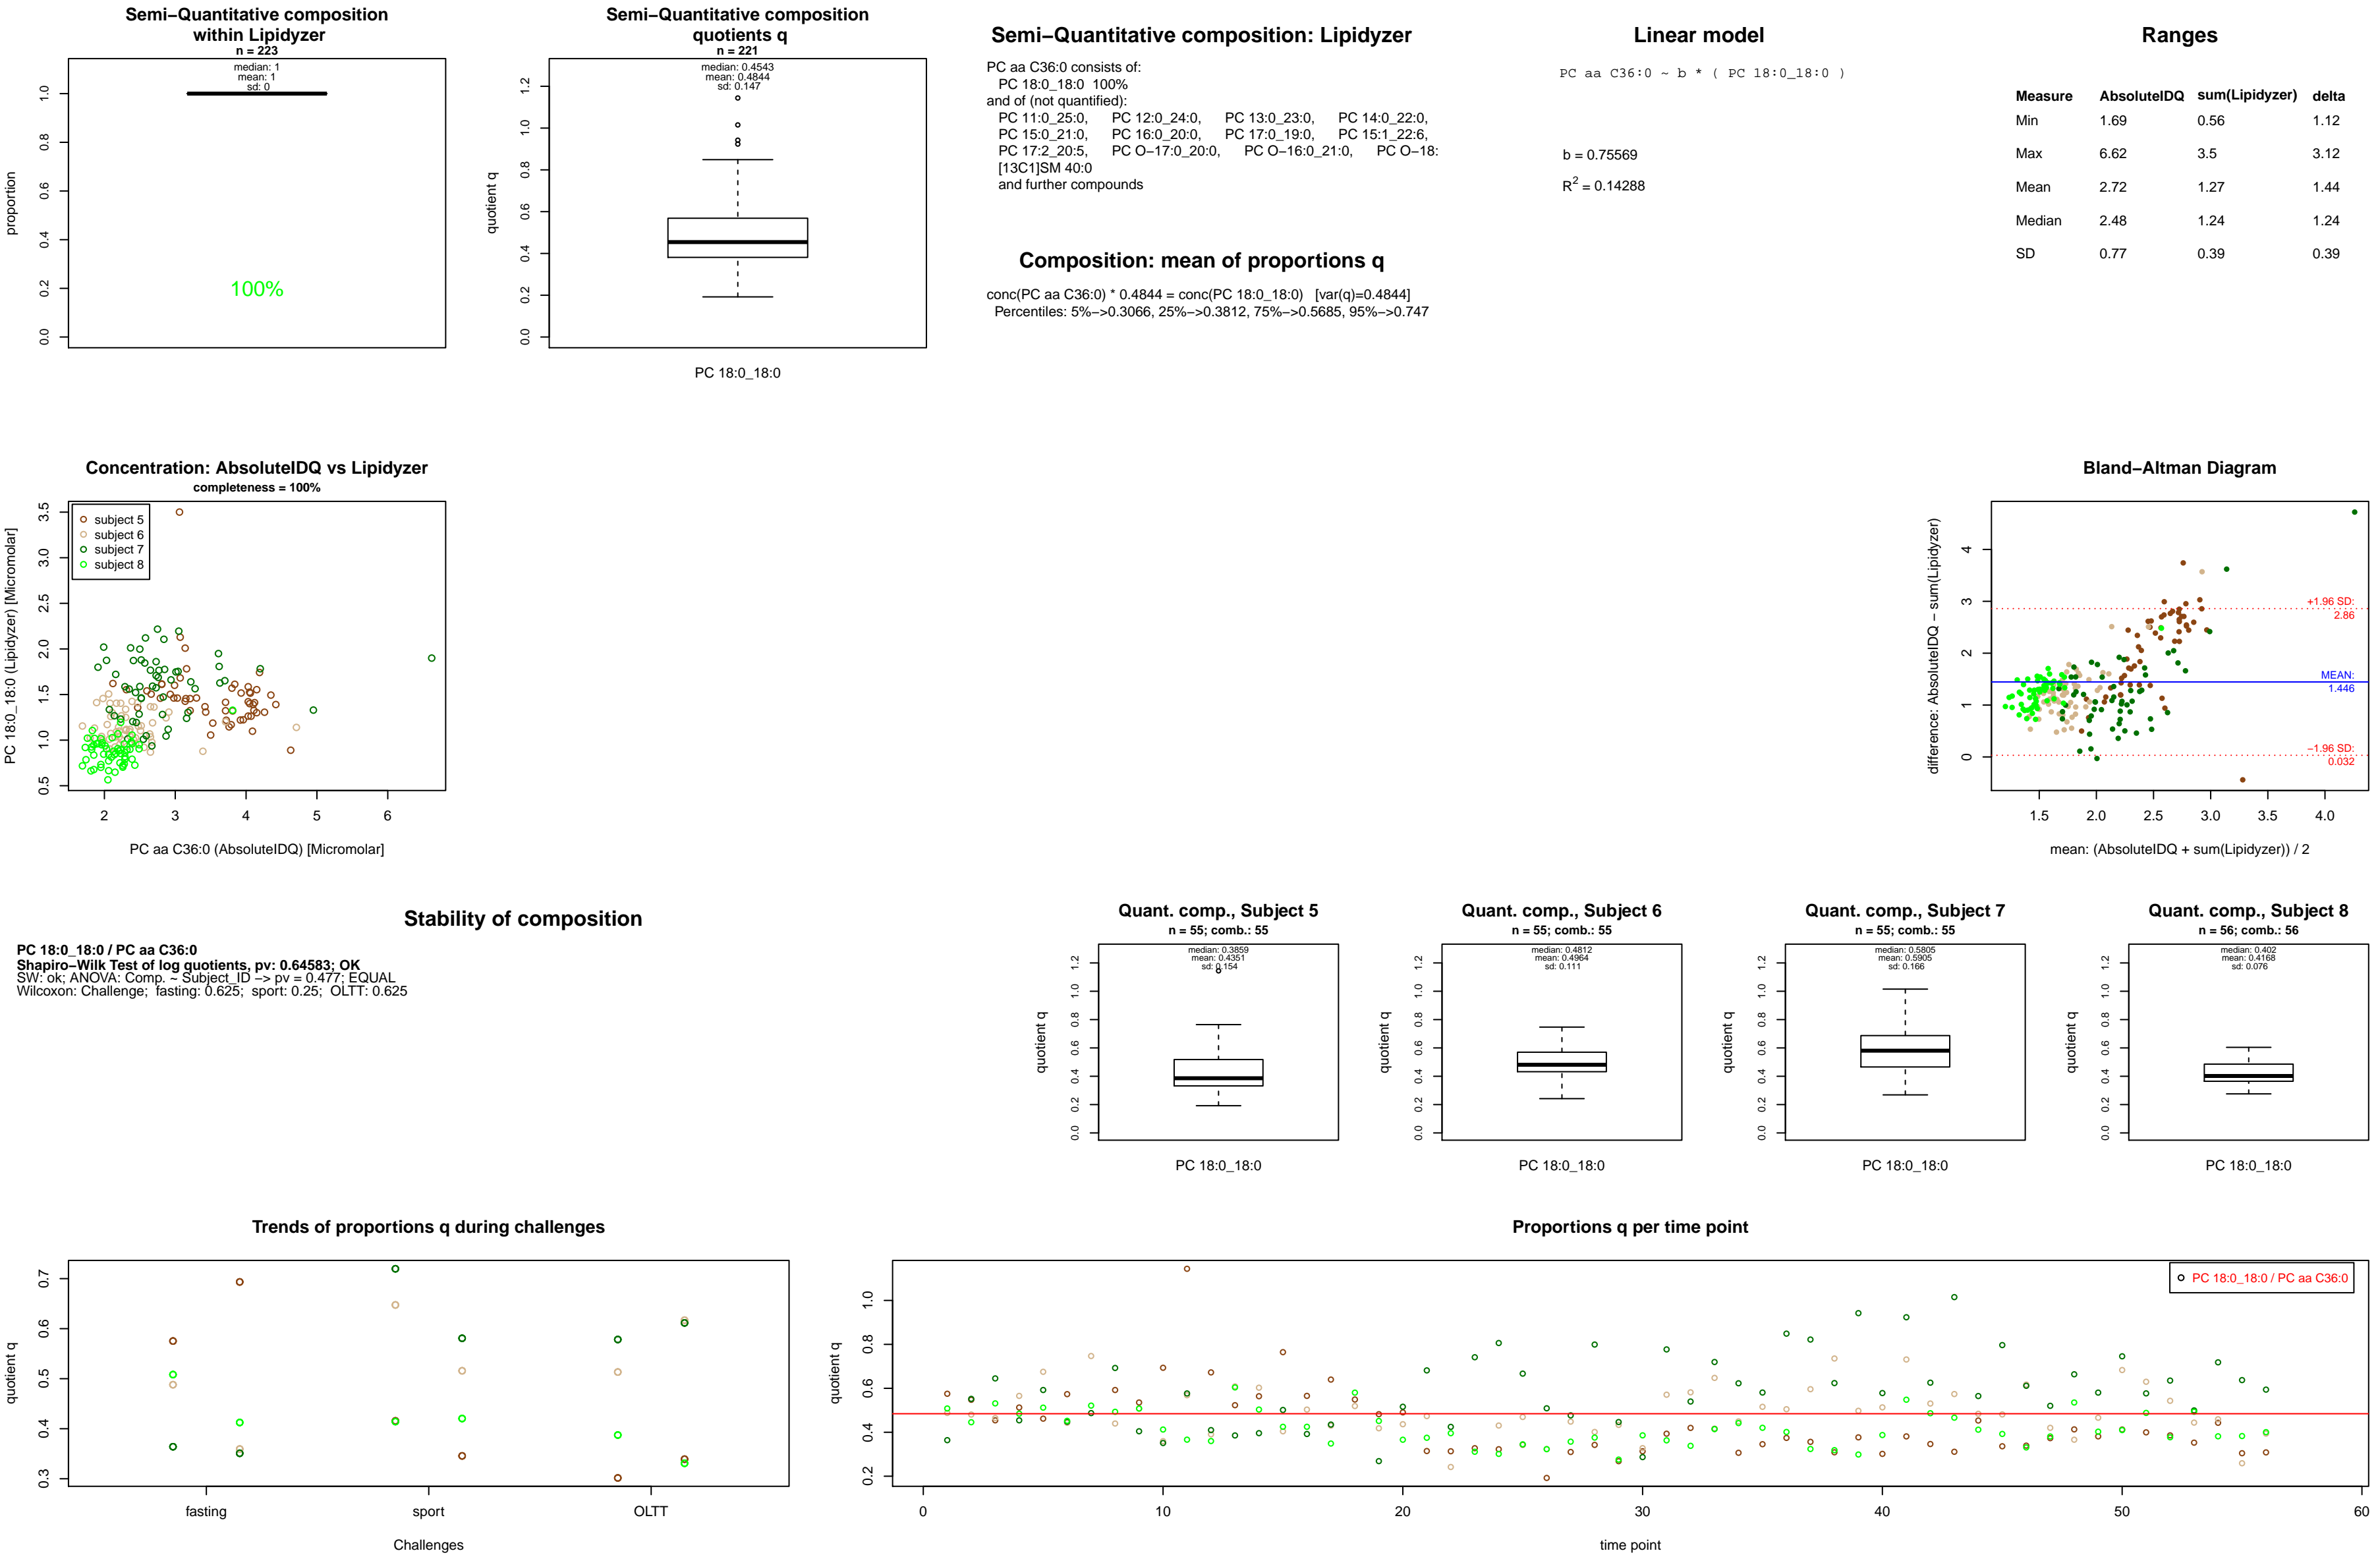

**PC aa C36:1 = PC 16:0\_20:1 + PC 18:0\_18:1 + PC 20:0\_16:1 + R**

PC 20:0\_16:1 excluded because of missingness > 75%

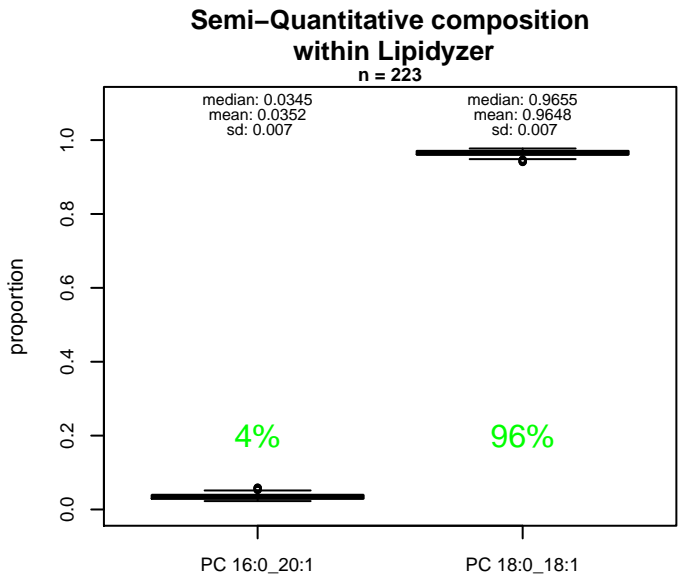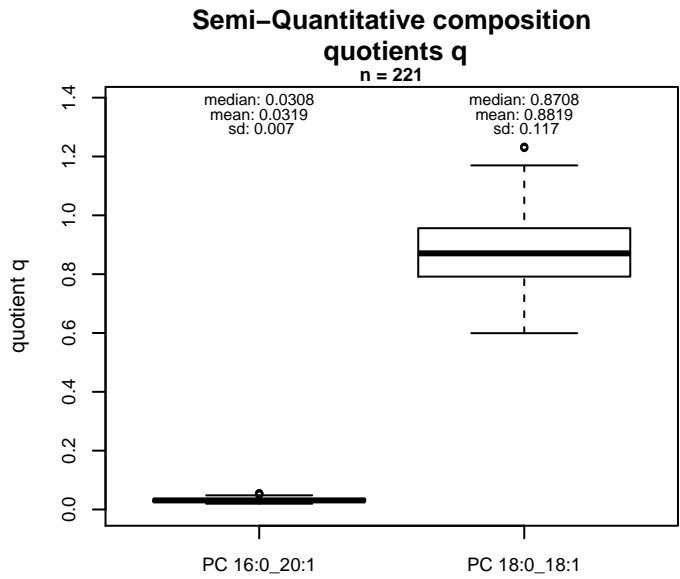

**Semi-Quantitative composition: Lipidzyzer**

PC aa C36:1 consists of:  
PC 16:0\_20:1 3.5%  
PC 18:0\_18:1 96.5%  
and of (not quantified):  
PC 20:0\_16:1, PC 14:0\_22:1, PC 14:1\_22:0, PC 15:1\_21:0,  
PC 16:1\_20:0, PC 17:0\_19:1, PC 17:1\_19:0, PC O-18:0\_19:  
PC O-20:0\_17:1, PC O-16:1\_21:0, PC O-18:1\_19:0, PC O-  
[13C1]SM 40:1  
and further compounds

**Composition: mean of proportions q**

$\text{conc}(\text{PC aa C36:1}) * 0.0319 = \text{conc}(\text{PC 16:0_20:1})$  [var(q)=0.0319]  
Percentiles: 5%→0.0231, 25%→0.027, 75%→0.0359, 95%→0.0447  
 $\text{conc}(\text{PC aa C36:1}) * 0.8819 = \text{conc}(\text{PC 18:0_18:1})$  [var(q)=0.8819]  
Percentiles: 5%→0.7171, 25%→0.7916, 75%→0.9562, 95%→1.0794

**Linear model**

$\text{PC aa C36:1} \sim b * (\text{PC 16:0_20:1} + \text{PC 18:0_18:1})$

b = 0.89548

R<sup>2</sup> = 0.7898

**Ranges**

| Measure | AbsoluteIDQ | sum(Lipidzyzer) | delta |
|---------|-------------|-----------------|-------|
| Min     | 20.7        | 19.85           | 0.85  |
| Max     | 68.9        | 68.55           | 0.35  |
| Mean    | 41.15       | 37.5            | 3.66  |
| Median  | 40.6        | 34.64           | 5.96  |
| SD      | 11.29       | 11.16           | 0.13  |

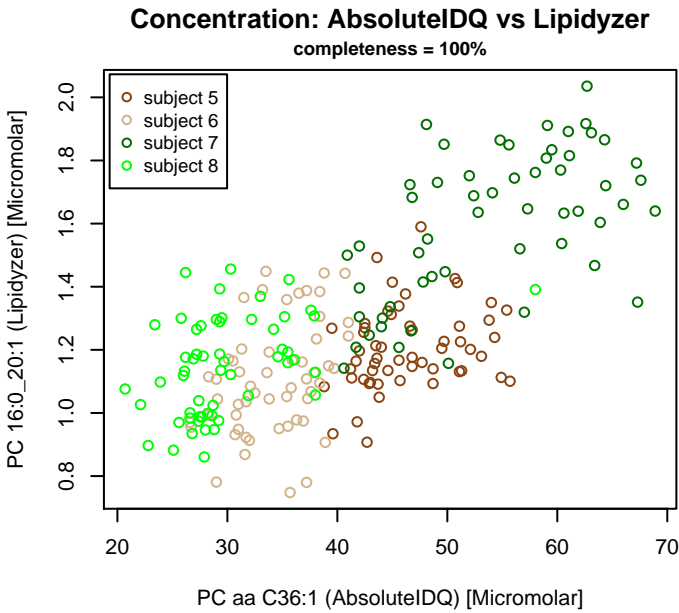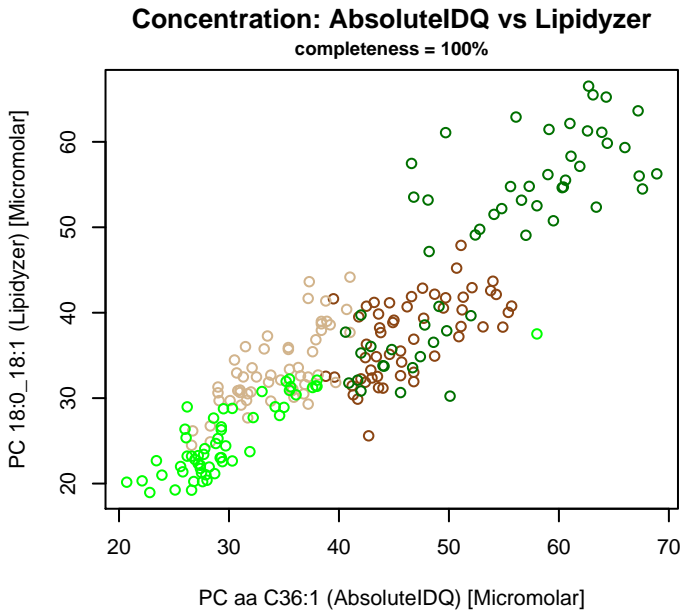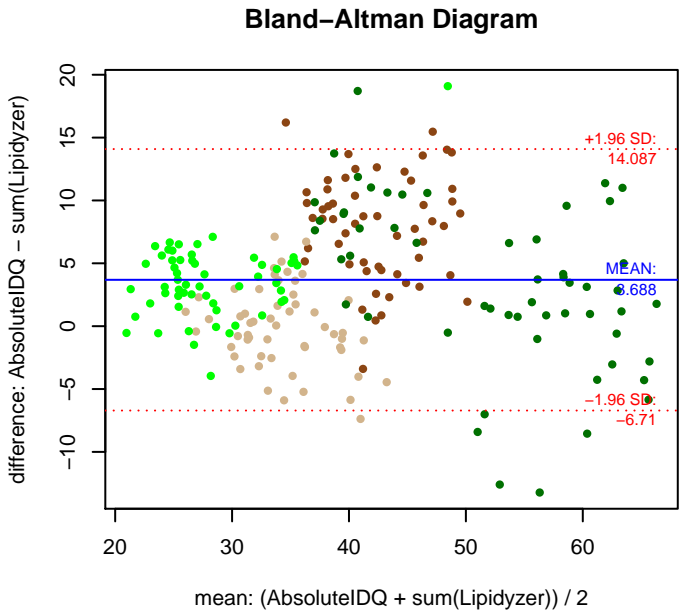

**Stability of composition**

(PC 16:0\_20:1 + PC 18:0\_18:1) / PC aa C36:1  
**Shapiro-Wilk Test of log quotients, pv: 0.7629; OK**  
SW: ok; ANOVA: Comp. ~ Subject\_ID → pv = 0.16842; EQUAL  
Wilcoxon: Challenge; fasting: 0.25; sport: 0.125; OLTT: 0.875

PC 16:0\_20:1 / PC aa C36:1  
**Shapiro-Wilk Test of log quotients, pv: 0.27012; OK**  
SW: ok; ANOVA: Comp. ~ Subject\_ID → pv = 0; DIFFERENCE  
Wilcoxon: Challenge; fasting: 0.25; sport: 0.125; OLTT: 0.625

PC 18:0\_18:1 / PC aa C36:1  
**Shapiro-Wilk Test of log quotients, pv: 0.66034; OK**  
SW: ok; ANOVA: Comp. ~ Subject\_ID → pv = 0.39144; EQUAL  
Wilcoxon: Challenge; fasting: 0.25; sport: 0.125; OLTT: 0.875

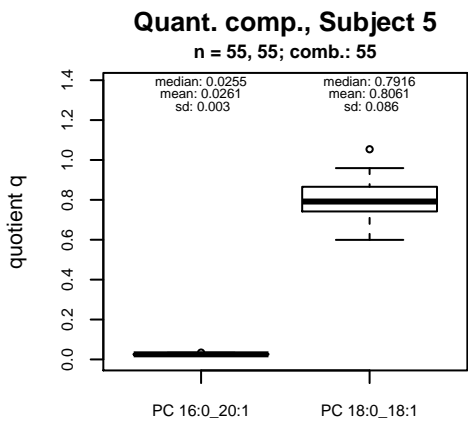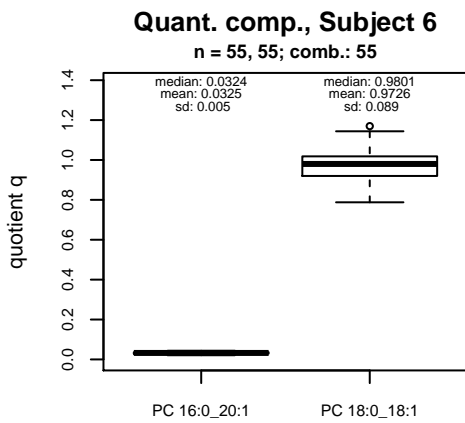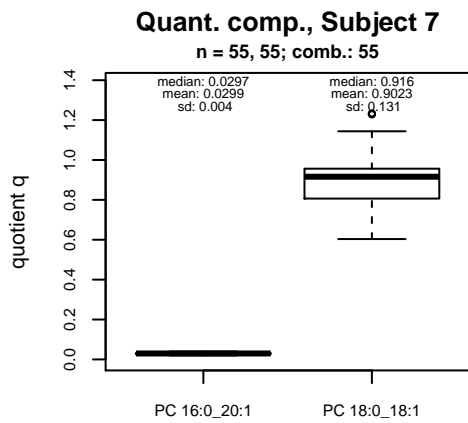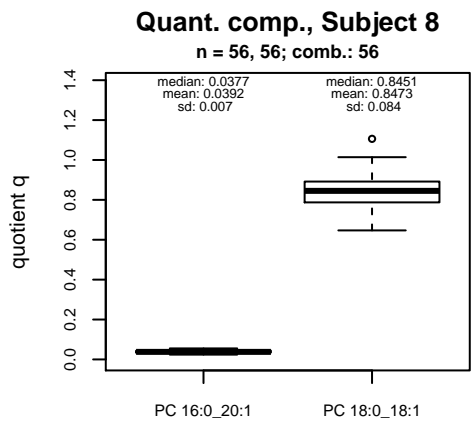

**Trends of proportions q during challenges**

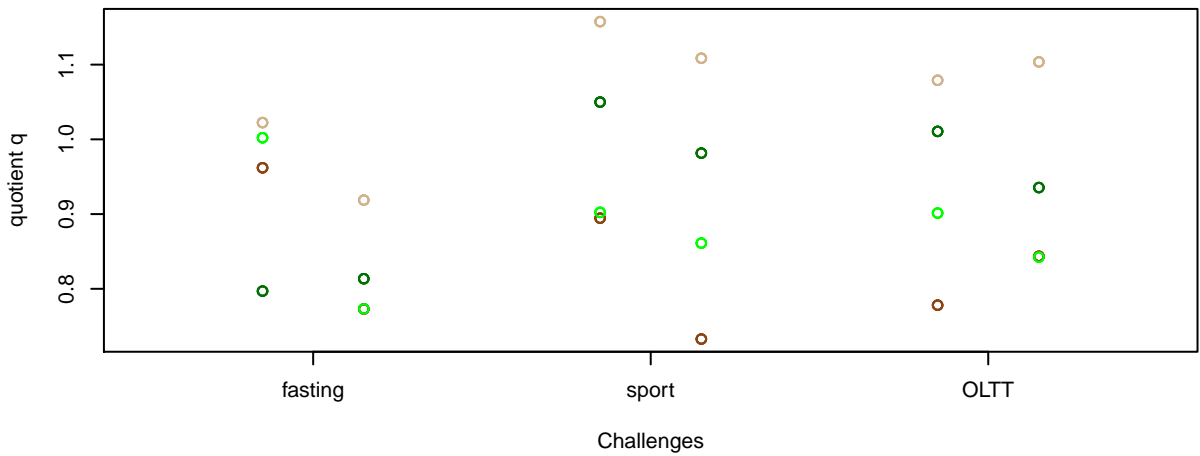

**Proportions q per time point**

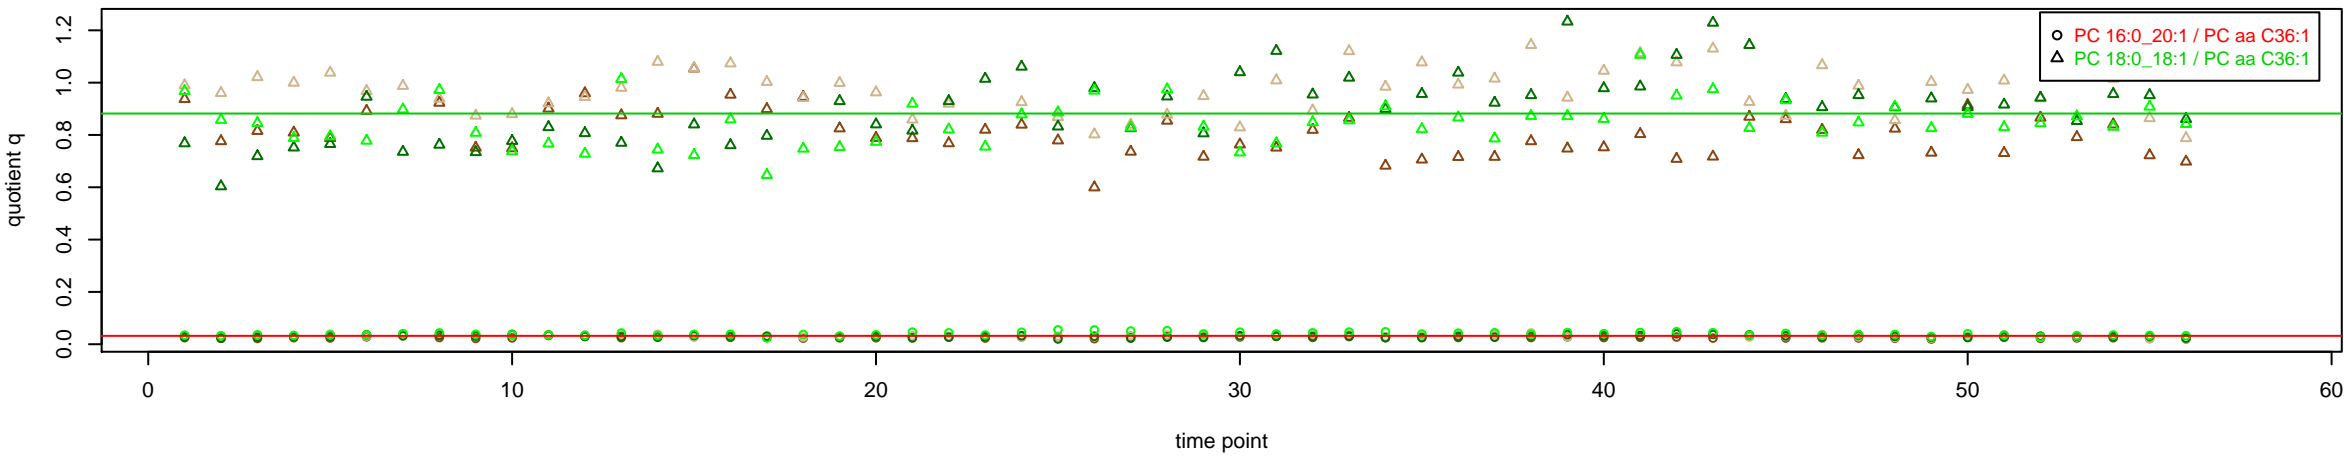





PC aa C36:3 = PC 16:0\_20:3 + PC 18:0\_18:3 + PC 18:1\_18:2 + R

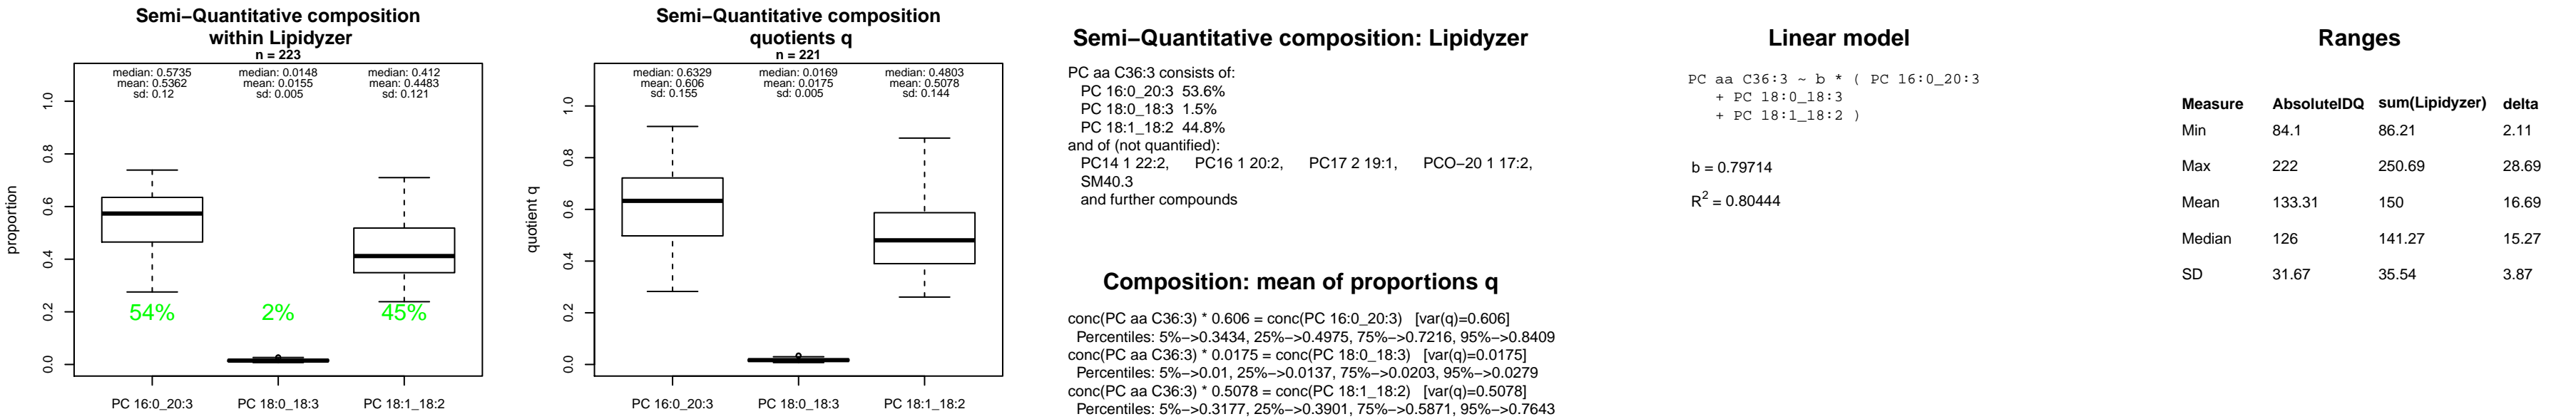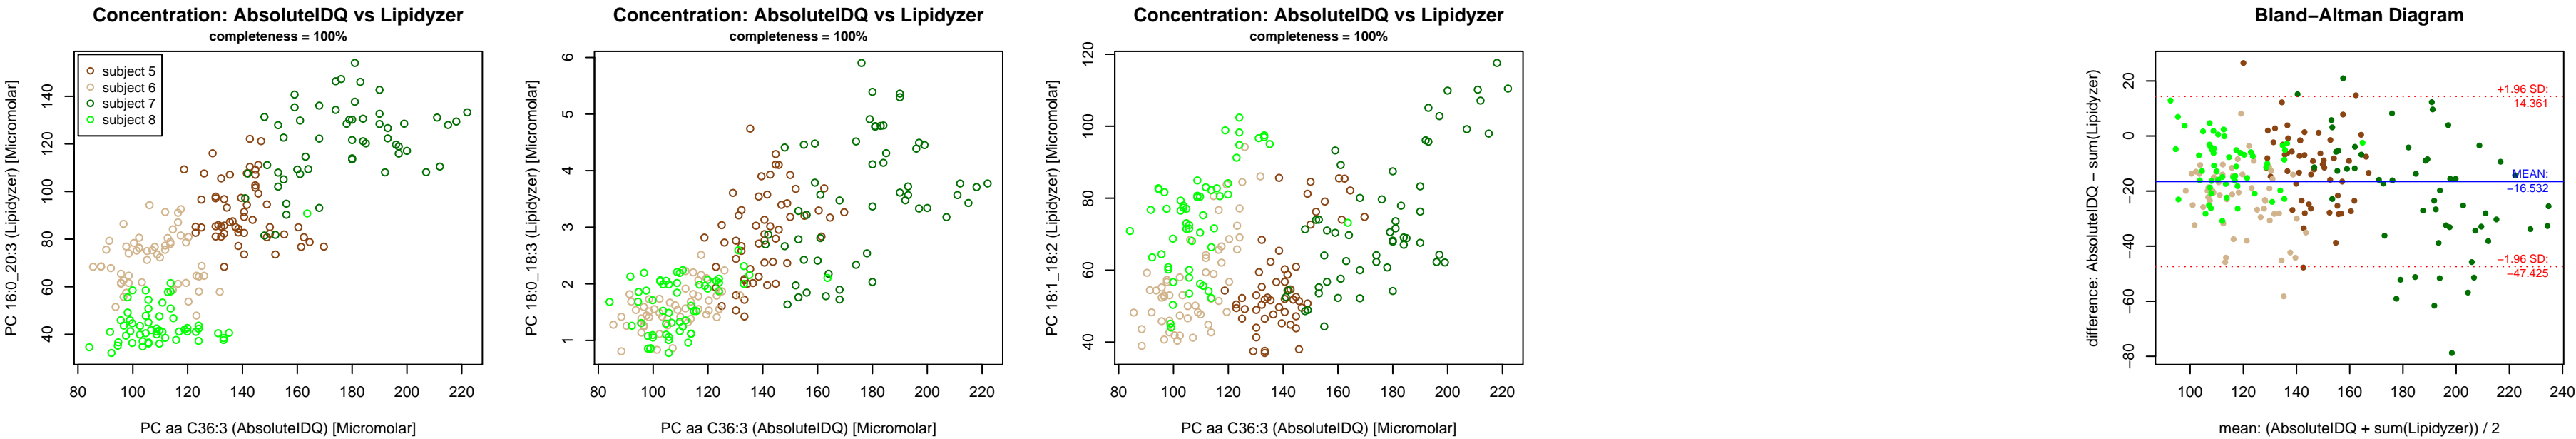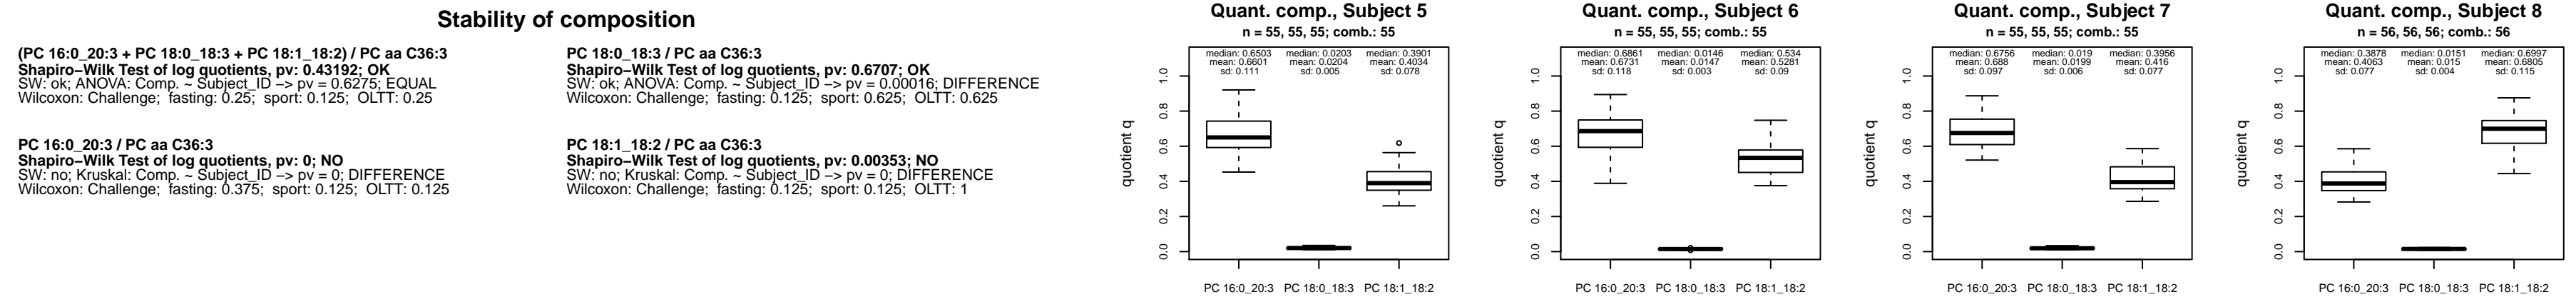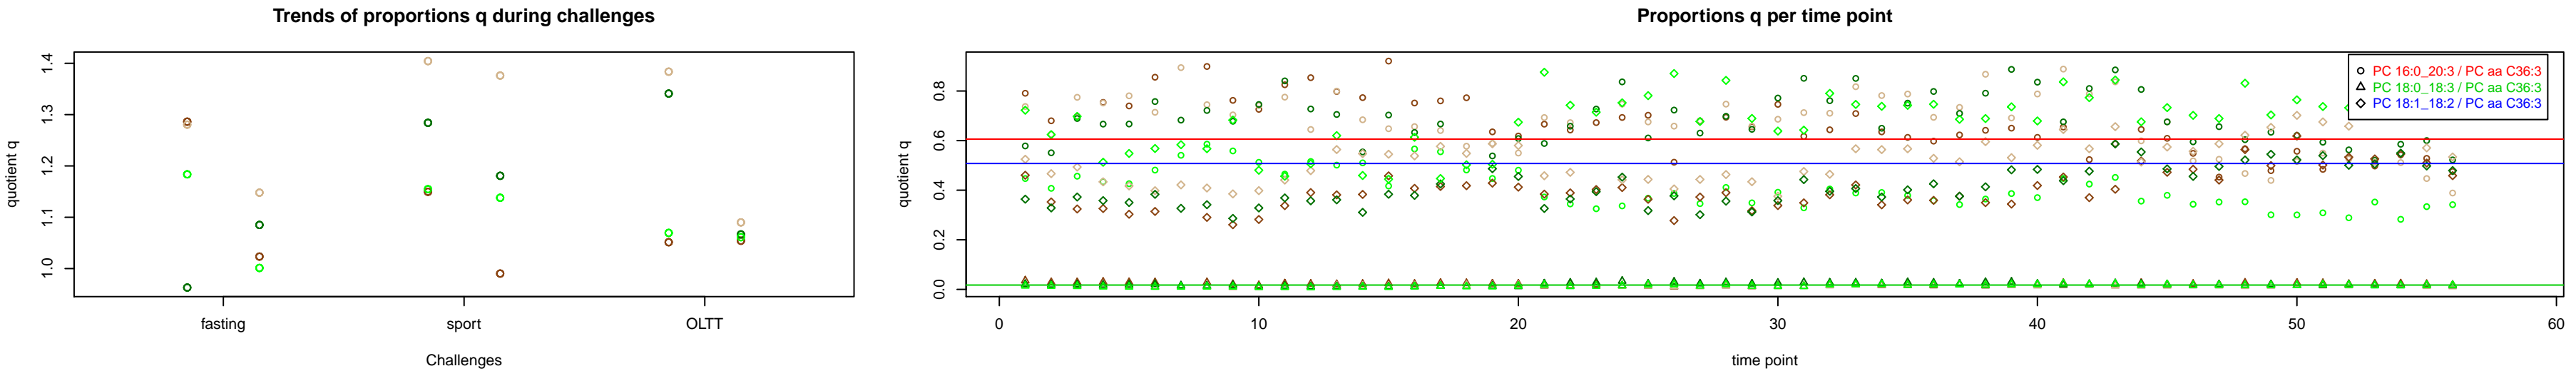



PC aa C36:4 = PC 14:0\_22:4 + PC 16:0\_20:4 + PC 18:0\_18:4 + PC 18:1\_18:3 + PC 18:2\_18:2 + R

PC 18:0\_18:4 excluded because of missingness > 75%

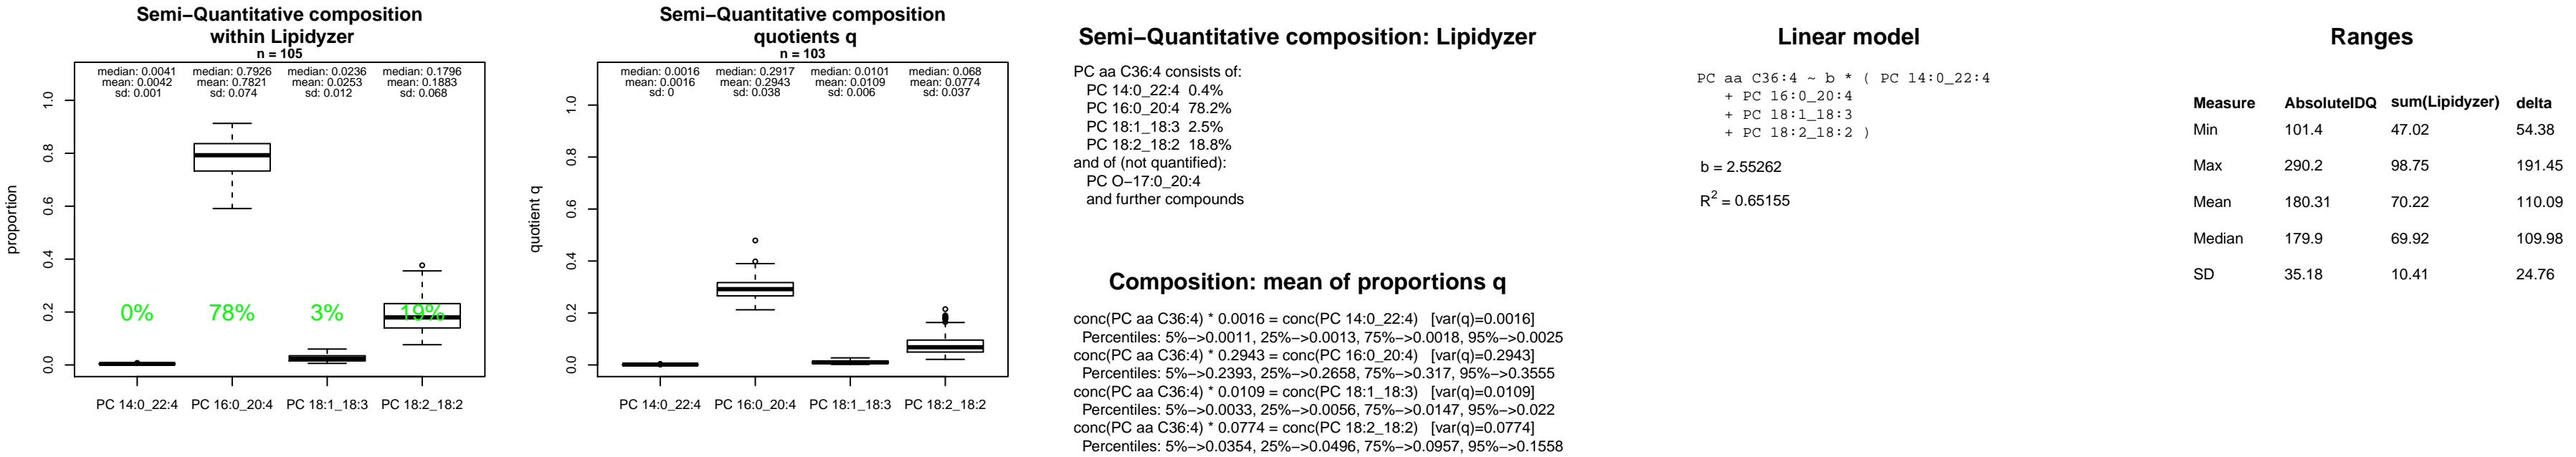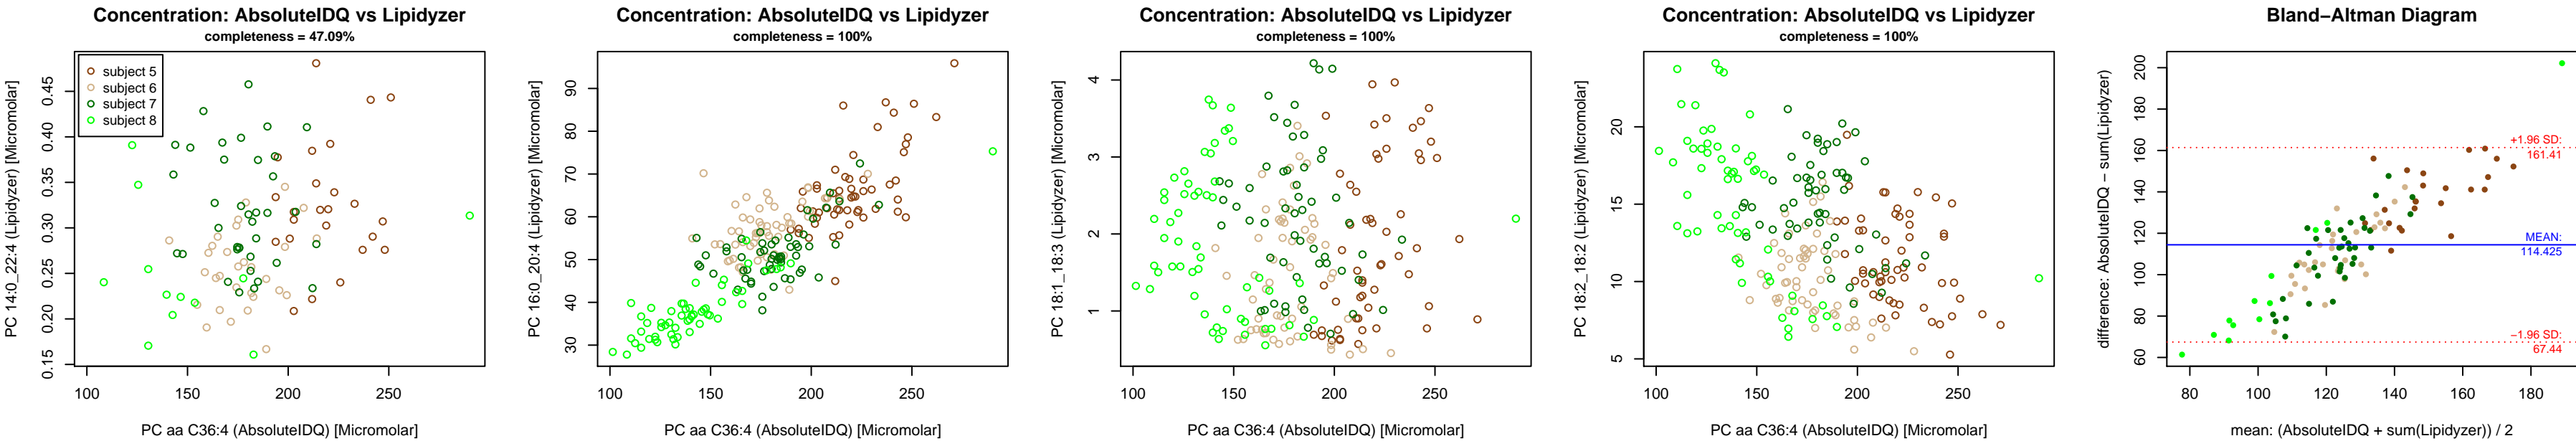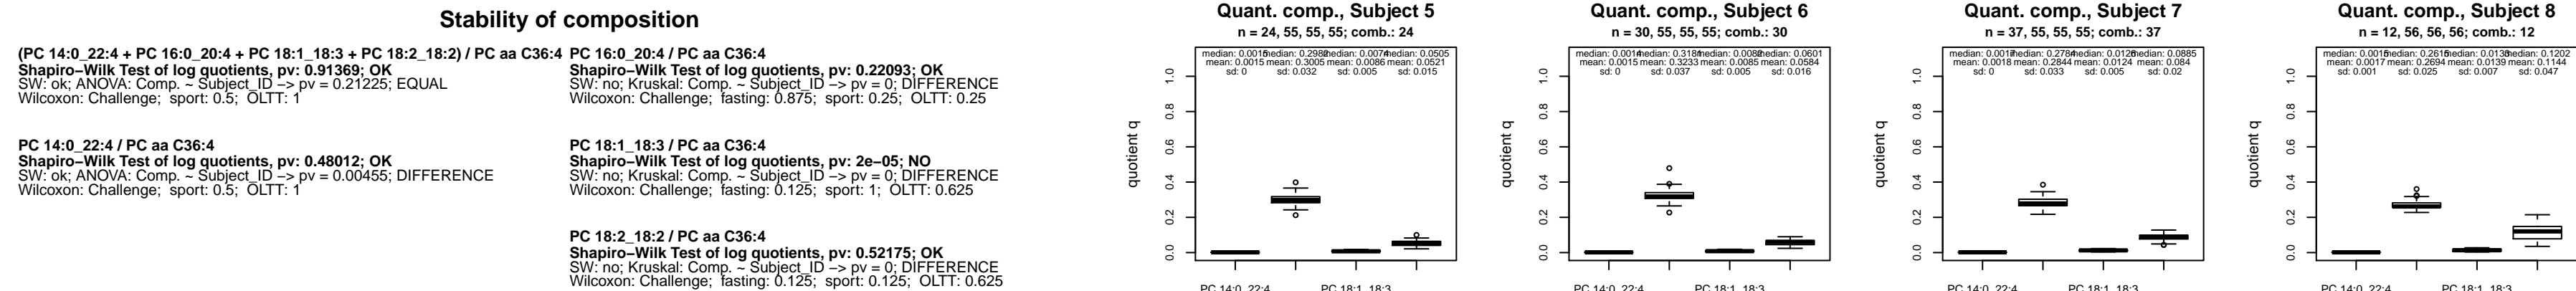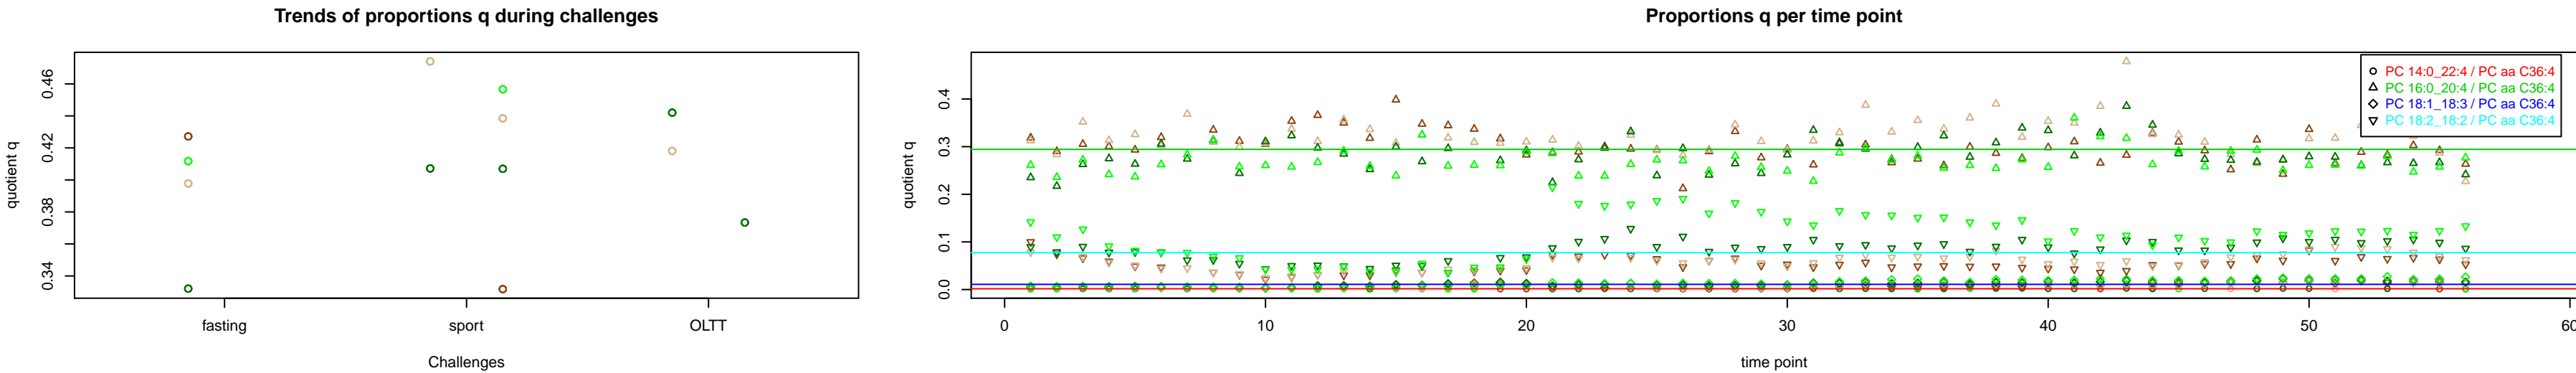

PC aa C36:5 = PC 14:0\_22:5 + PC 16:0\_20:5 + PC 18:2\_18:3 + R

PC 16:0\_20:5 excluded because of missingness > 75%

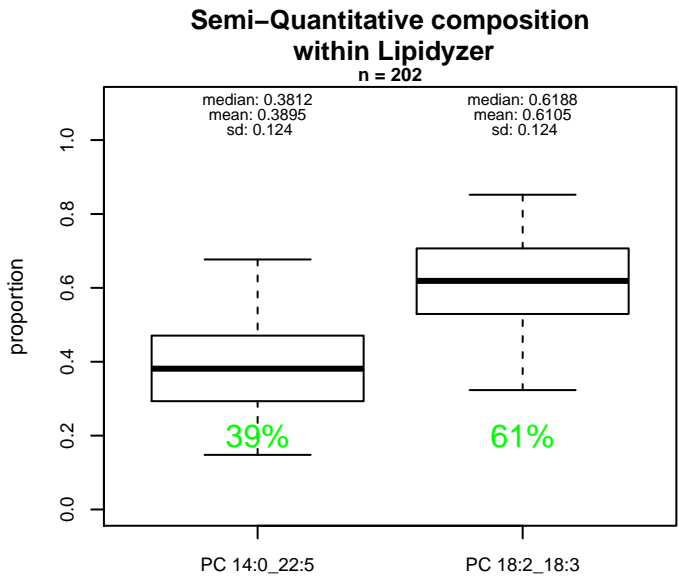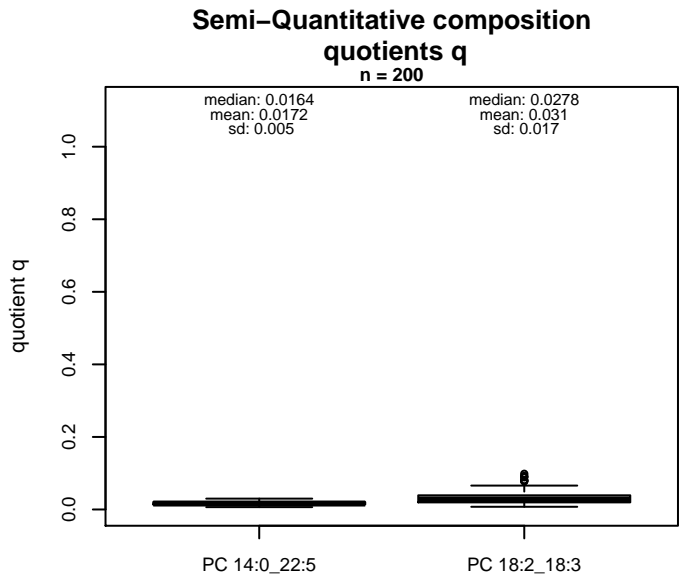

**Semi-Quantitative composition: Lipidzyer**

PC aa C36:5 consists of:  
PC 14:0\_22:5 39%  
PC 18:2\_18:3 61%  
and of (not quantified):  
PC 16:0\_20:5, PC 14 1\_22:4, PC 16 1\_20:4, PC 18 1\_18:4,  
and further compounds

**Composition: mean of proportions q**

conc(PC aa C36:5) \* 0.0172 = conc(PC 14:0\_22:5) [var(q)=0.0172]  
Percentiles: 5%→0.0101, 25%→0.0138, 75%→0.0206, 95%→0.0262  
conc(PC aa C36:5) \* 0.031 = conc(PC 18:2\_18:3) [var(q)=0.031]  
Percentiles: 5%→0.0113, 25%→0.0196, 75%→0.0391, 95%→0.0615

**Linear model**

PC aa C36:5 ~ b \* ( PC 14:0\_22:5 + PC 18:2\_18:3 )

b = 9.52537

R<sup>2</sup> = 0.17224

**Ranges**

| Measure | AbsoluteIDQ | sum(Lipidzyer) | delta |
|---------|-------------|----------------|-------|
| Min     | 12.6        | 0.49           | 12.11 |
| Max     | 50.5        | 2.12           | 48.38 |
| Mean    | 27.44       | 1.24           | 26.2  |
| Median  | 28.7        | 1.24           | 27.46 |
| SD      | 9.37        | 0.38           | 8.99  |

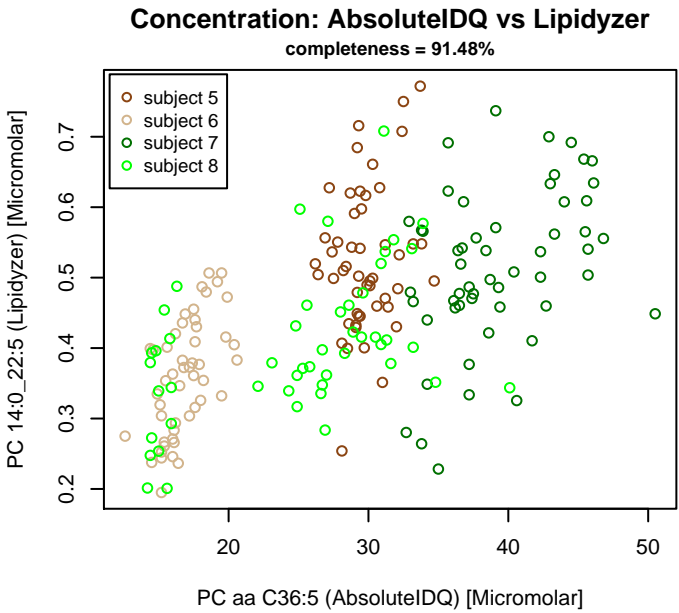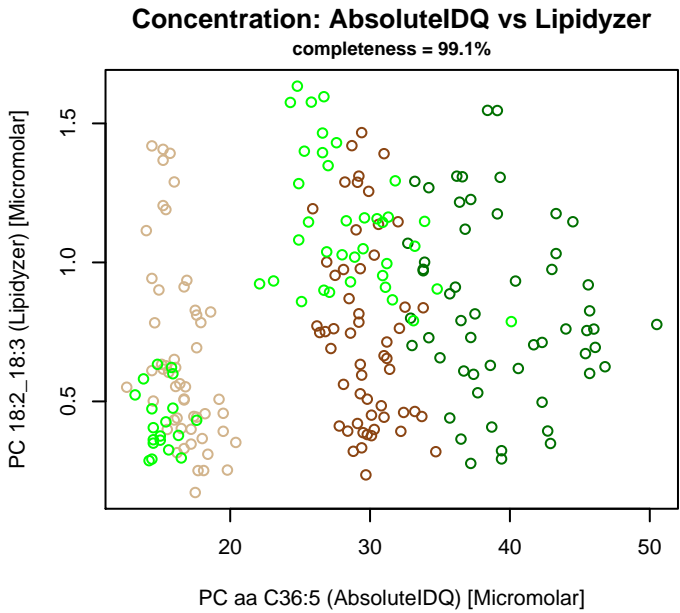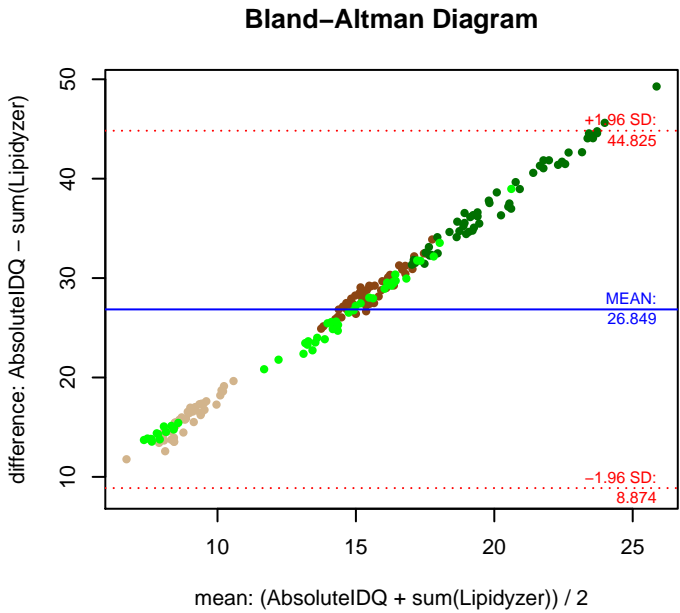

**Stability of composition**

(PC 14:0\_22:5 + PC 18:2\_18:3) / PC aa C36:5  
Shapiro-Wilk Test of log quotients, pv: 0.49031; OK  
SW: ok; ANOVA: Comp. ~ Subject\_ID -> pv = 0.43298; EQUAL  
Wilcoxon: Challenge; fasting: 1; sport: 0.125; OLTT: 0.5

PC 14:0\_22:5 / PC aa C36:5  
Shapiro-Wilk Test of log quotients, pv: 0.03493; OK  
SW: ok; ANOVA: Comp. ~ Subject\_ID -> pv = 2e-04; DIFFERENCE  
Wilcoxon: Challenge; fasting: 1; sport: 0.625; OLTT: 1

PC 18:2\_18:3 / PC aa C36:5  
Shapiro-Wilk Test of log quotients, pv: 0.25945; OK  
SW: ok; ANOVA: Comp. ~ Subject\_ID -> pv = 0.0212; EQUAL  
Wilcoxon: Challenge; fasting: 0.25; sport: 0.125; OLTT: 0.125

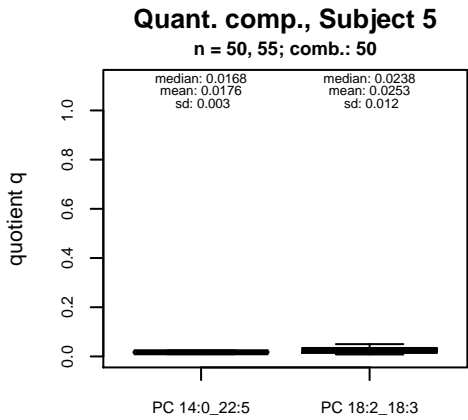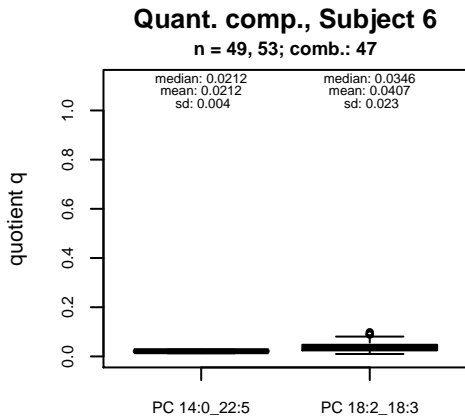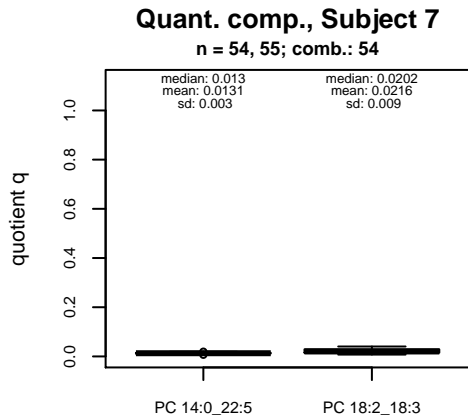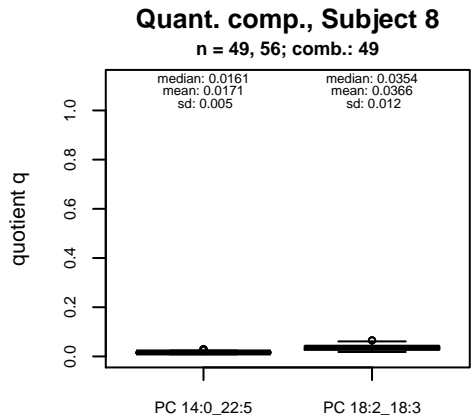

**Trends of proportions q during challenges**

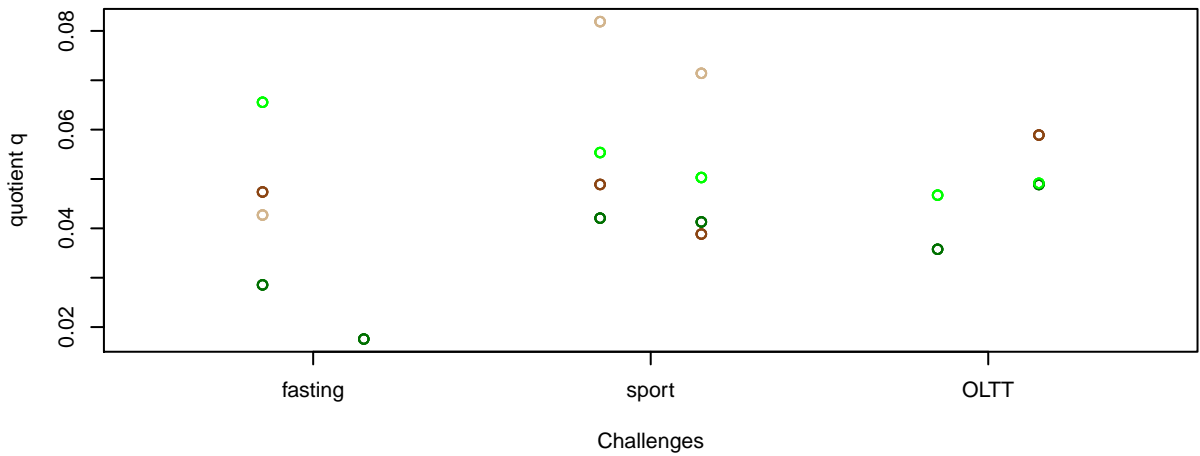

**Proportions q per time point**

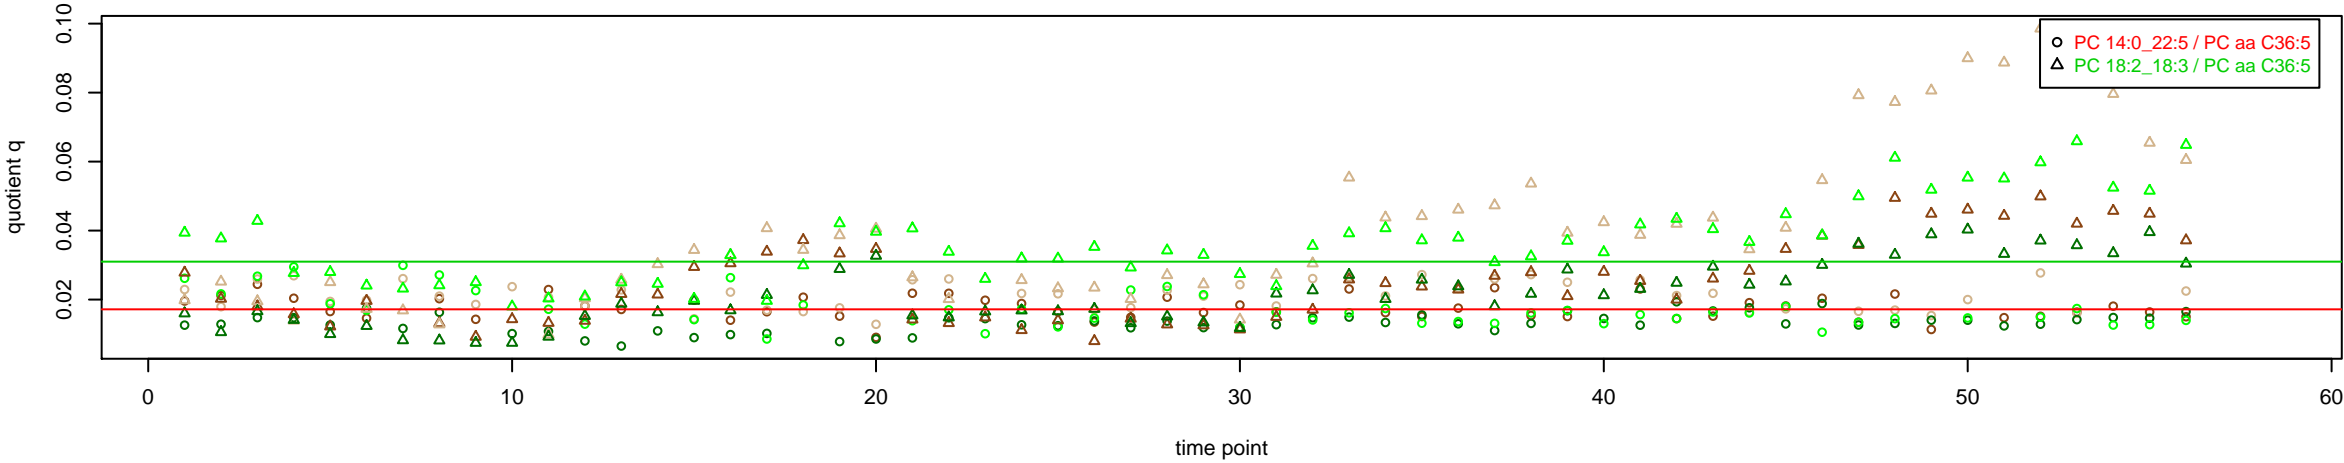

PC aa C36:6 = PC 14:0\_22:6 + R

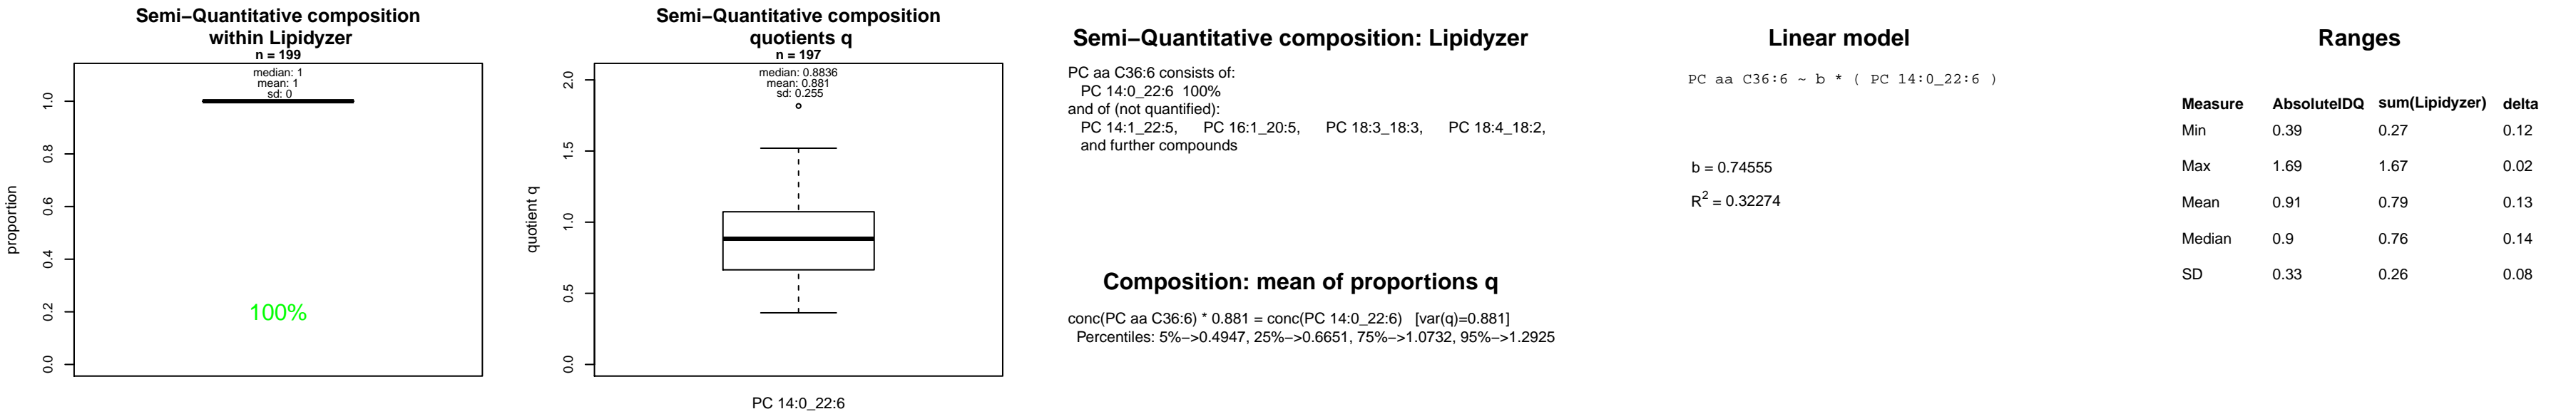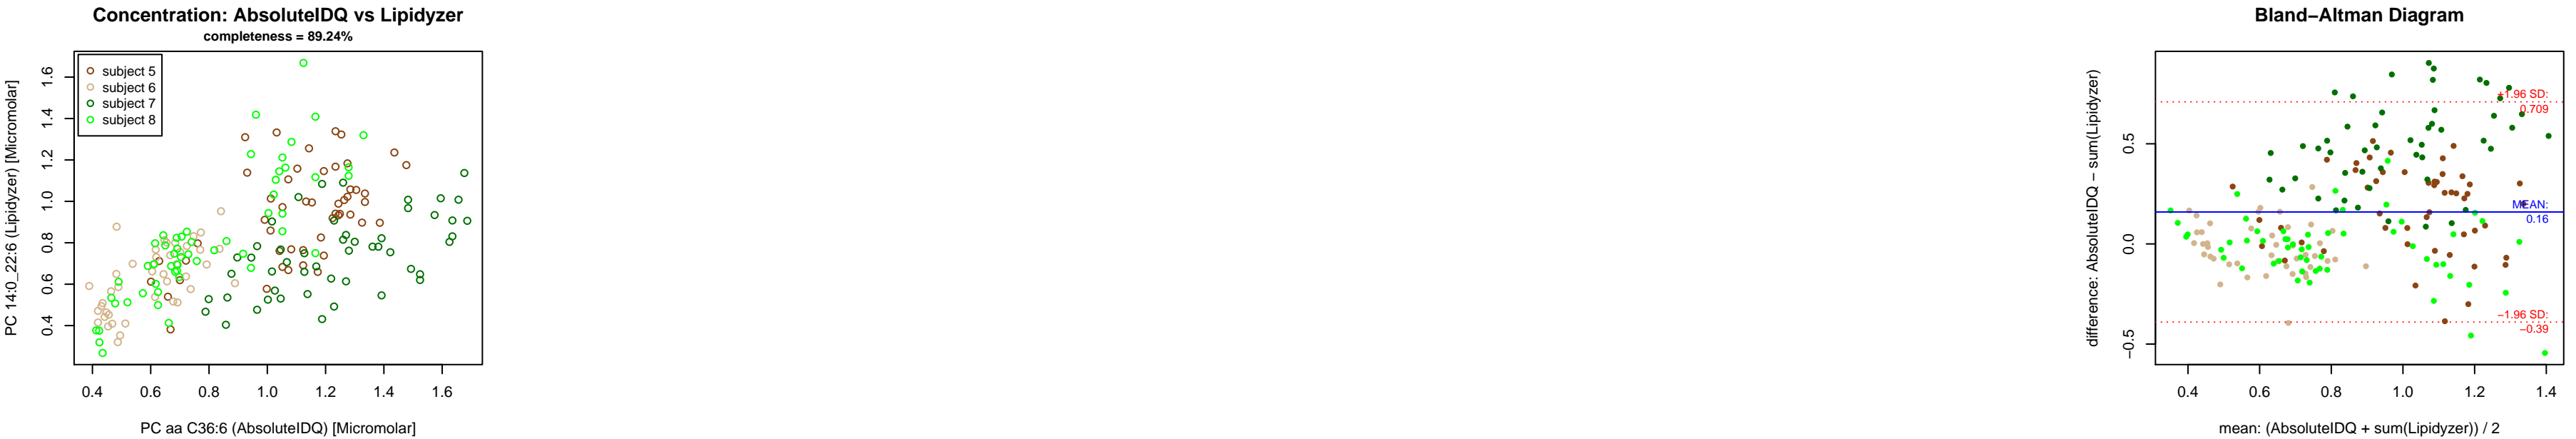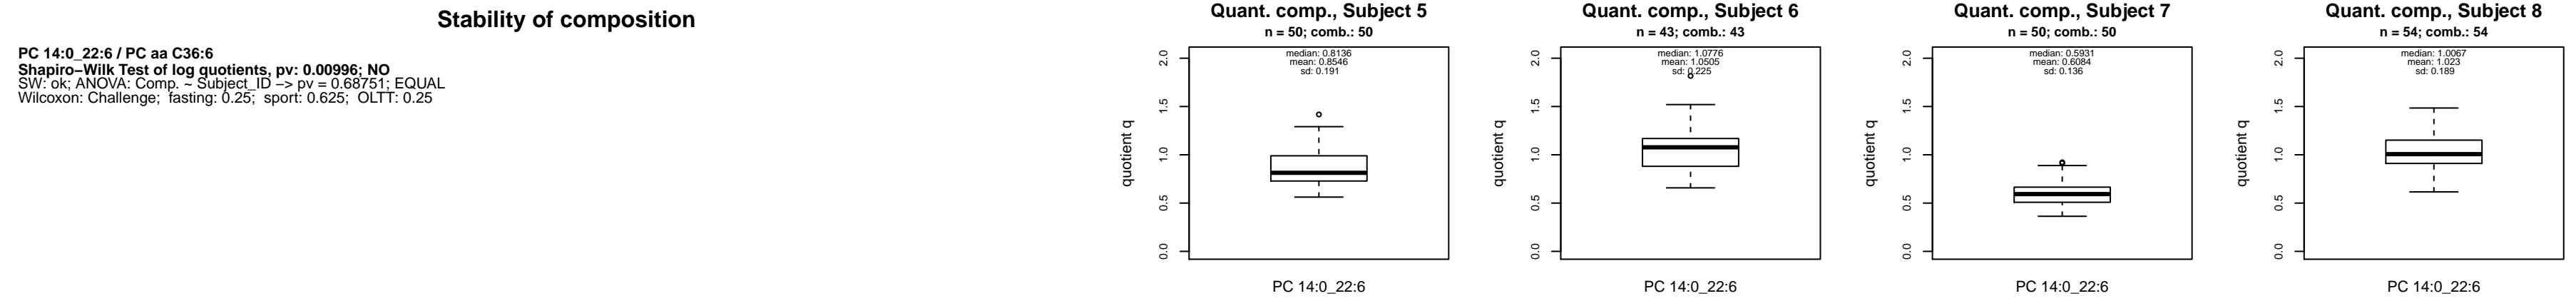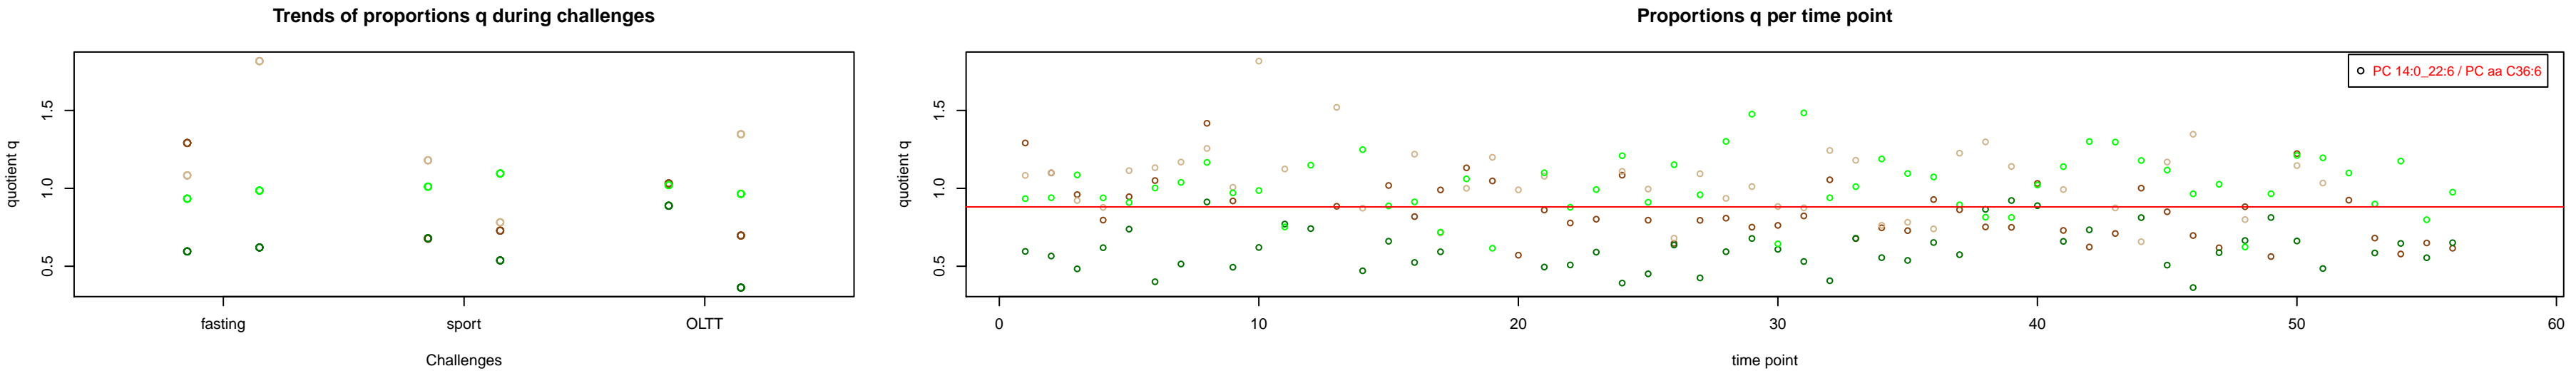

PC aa C38:0 = PC 18:0\_20:0 + R

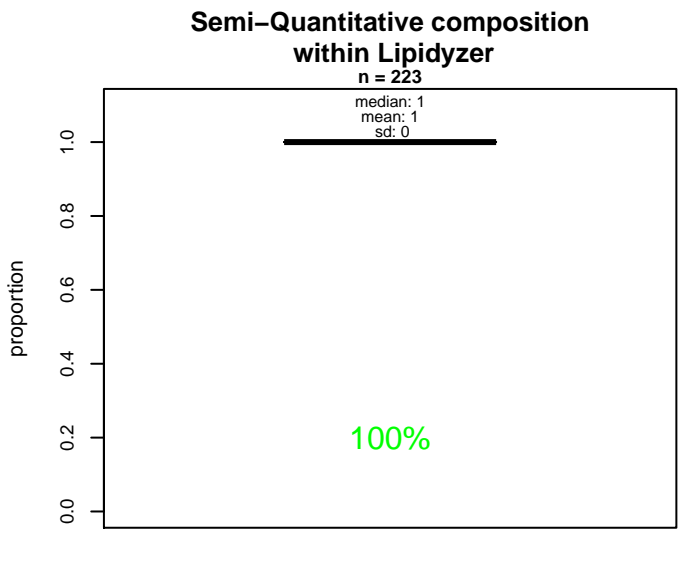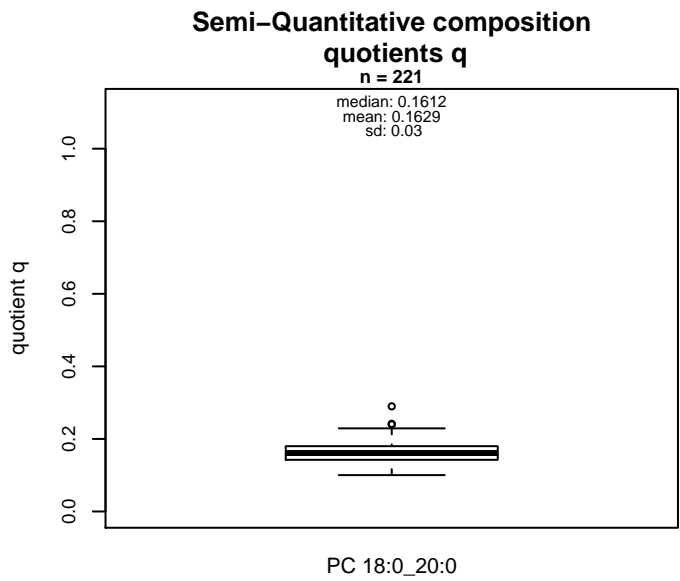

Semi-Quantitative composition: Lipidzyer

PC aa C38:0 consists of:  
PC 18:0\_20:0 100%  
and of (not quantified):  
PC 12:0\_26:0, PC 13:0\_25:0, PC 14:0\_24:0, PC 16:0\_22:0,  
PC 17:0\_21:0, PC 17:1\_22:6, PC 19:0\_19:0, PC O-17:0\_22:0,  
PC O-18:0\_21:0, PC O-20:0\_19:0, PC O-18:1\_22:6, SM42.0  
and further compounds

Composition: mean of proportions q

conc(PC aa C38:0) \* 0.1629 = conc(PC 18:0\_20:0) [var(q)=0.1629]  
Percentiles: 5%→0.1193, 25%→0.1424, 75%→0.18, 95%→0.2153

Linear model

PC aa C38:0 ~ b \* ( PC 18:0\_20:0 )

b = 3.58022

R<sup>2</sup> = 0.34478

Ranges

| Measure | AbsoluteIDQ | sum(Lipidzyer) | delta |
|---------|-------------|----------------|-------|
| Min     | 2.33        | 0.35           | 1.98  |
| Max     | 5.48        | 0.92           | 4.56  |
| Mean    | 3.74        | 0.6            | 3.14  |
| Median  | 3.66        | 0.59           | 3.07  |
| SD      | 0.71        | 0.12           | 0.6   |

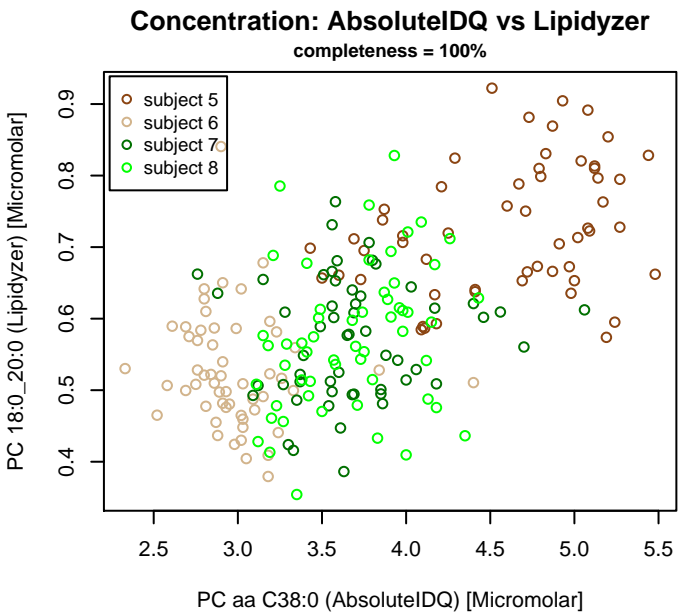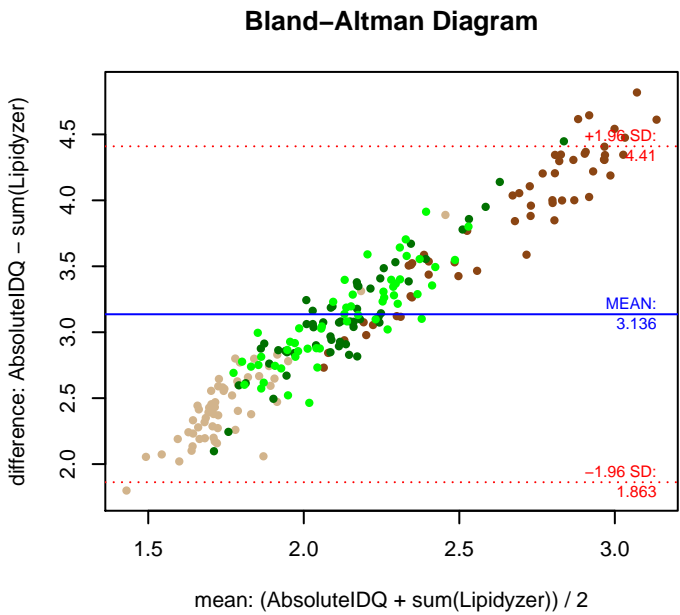

Stability of composition

PC 18:0\_20:0 / PC aa C38:0  
Shapiro-Wilk Test of log quotients, pv: 0.94774; OK  
SW: ok; ANOVA: Comp. ~ Subject\_ID -> pv = 0.05256; EQUAL  
Wilcoxon: Challenge; fasting: 0.625; sport: 0.25; OLTT: 1

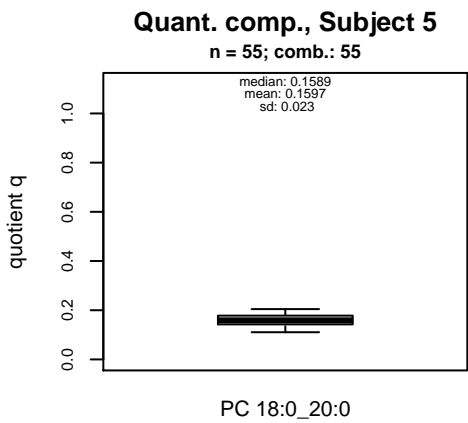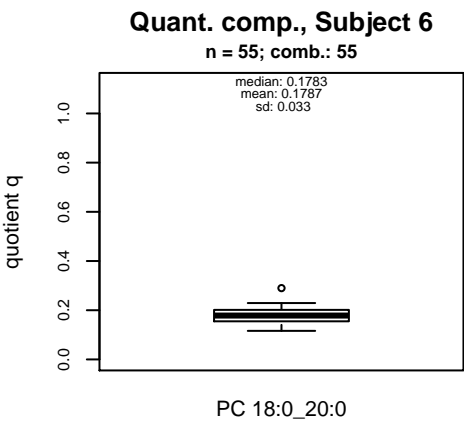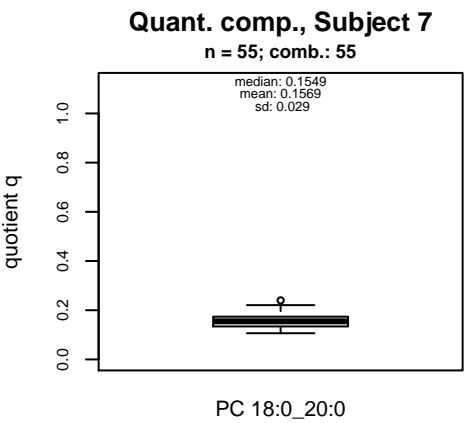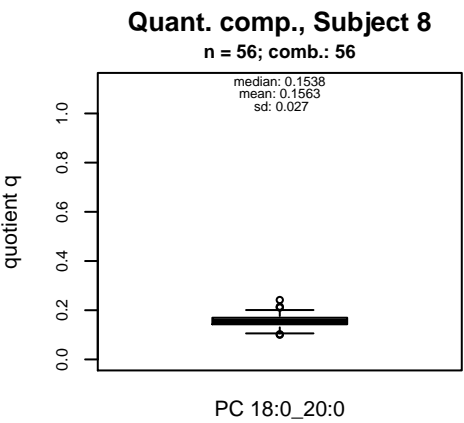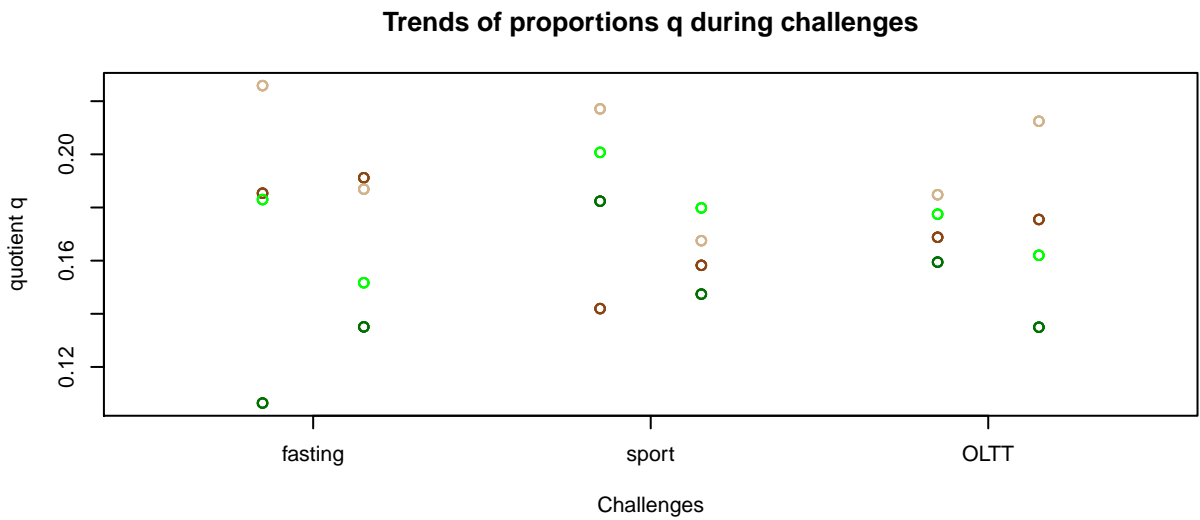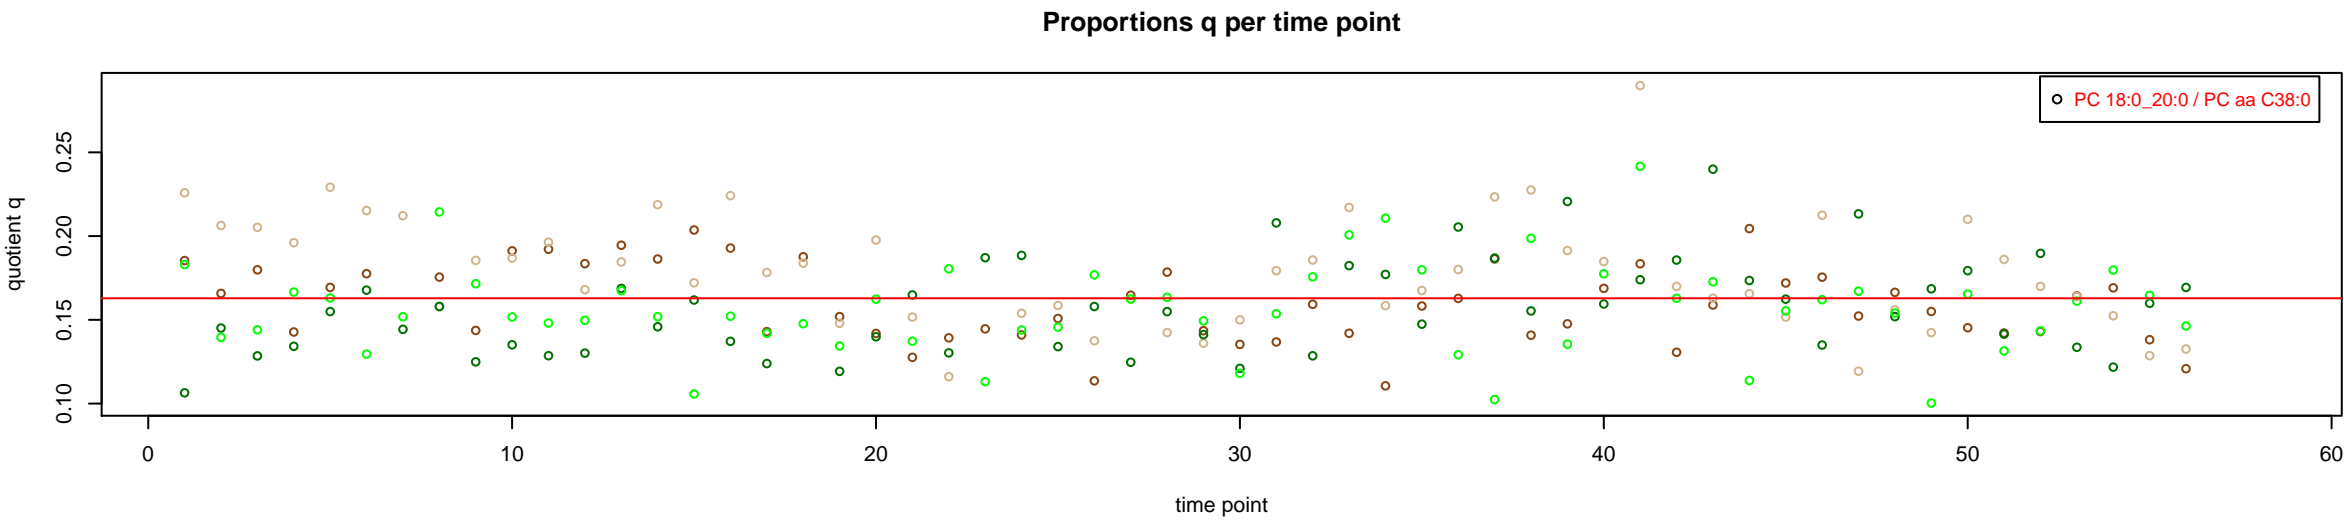



$$\text{PC aa C38:3} = \text{PC 18:0\_20:3} + \text{PC 18:1\_20:2} + \text{PC 18:2\_20:1} + \text{PC 20:0\_18:3} + \text{R}$$

PC 20:0\_18:3 excluded because of missingness > 75%

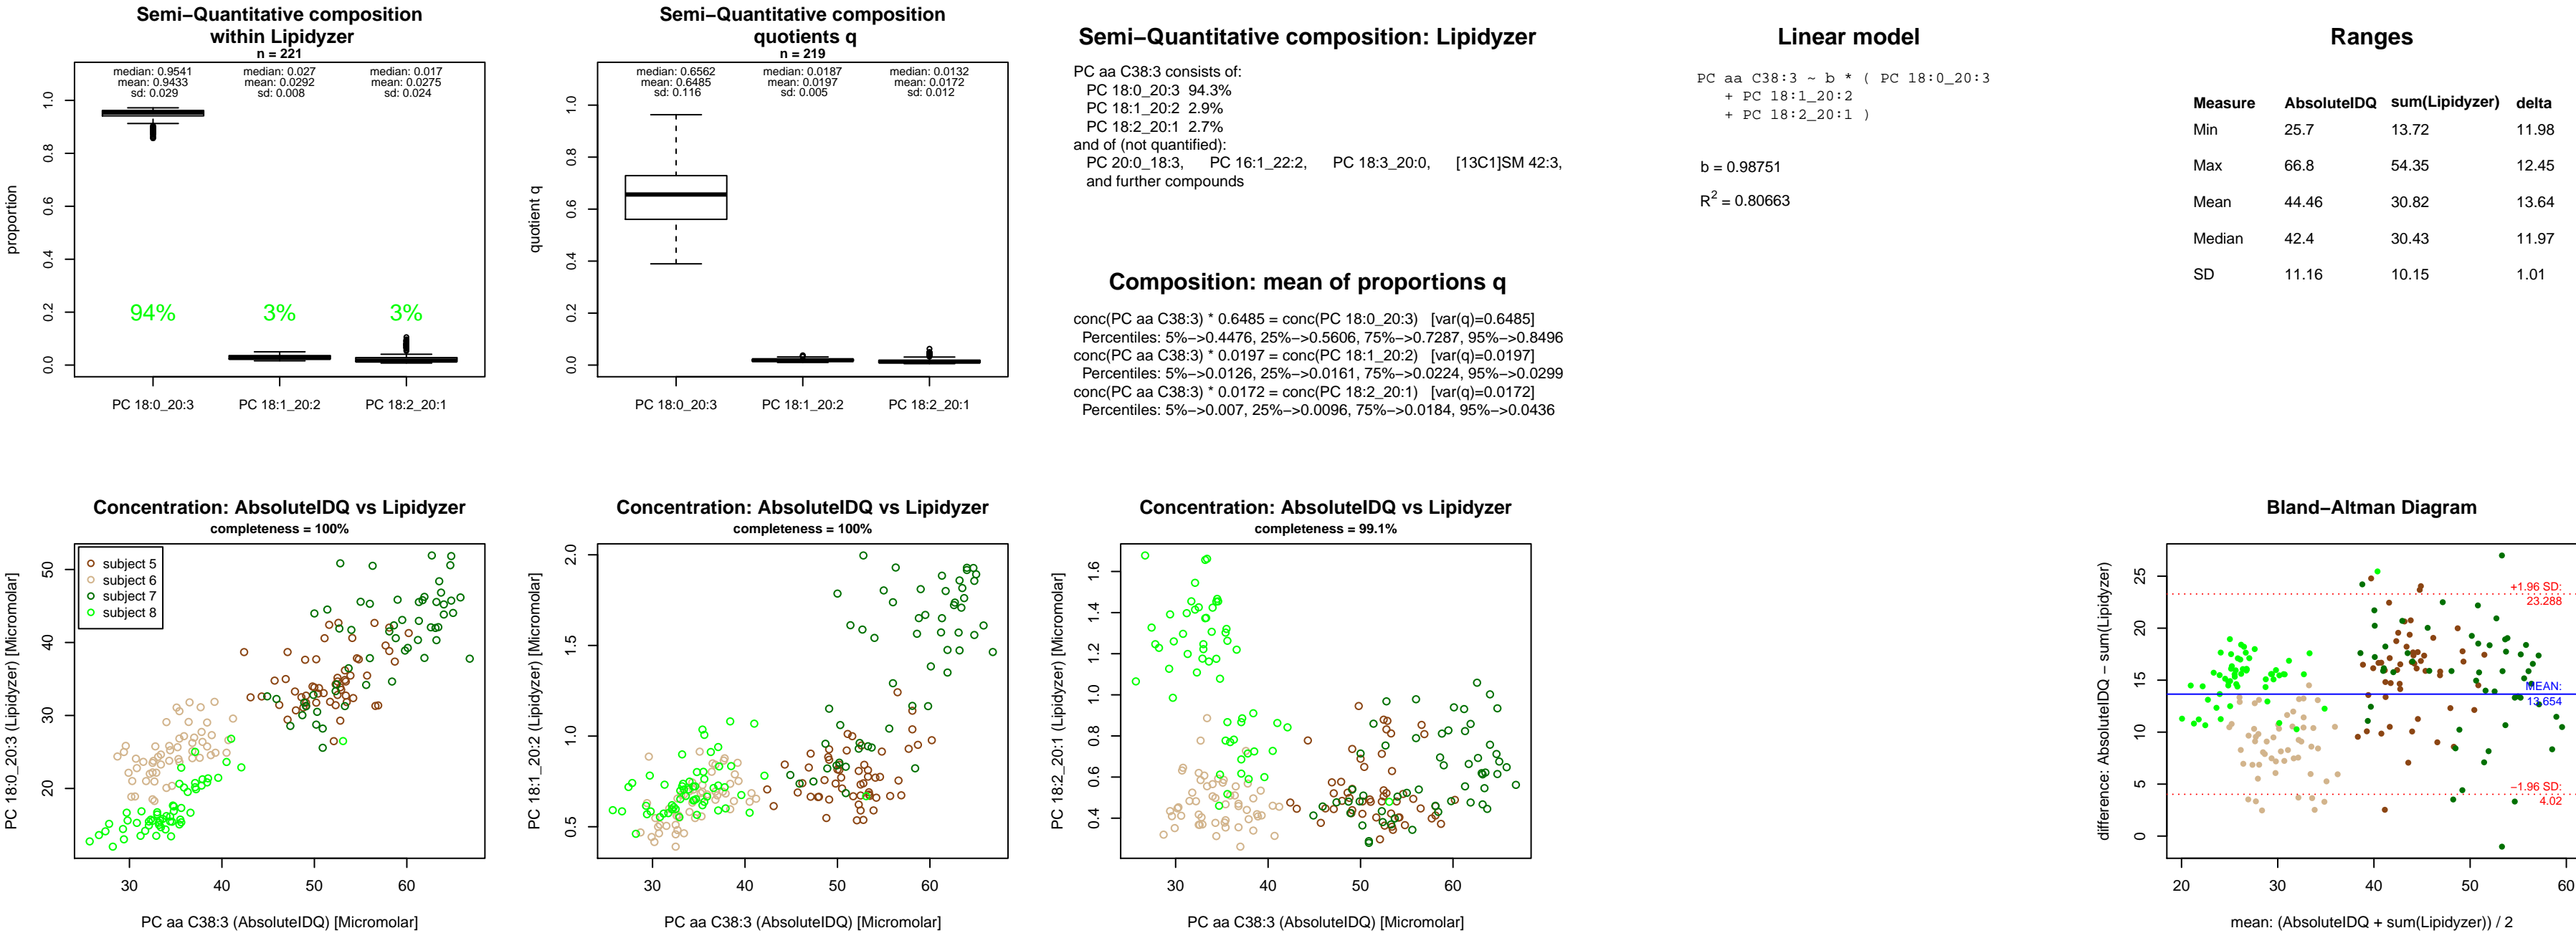

Stability of composition

(PC 18:0\_20:3 + PC 18:1\_20:2 + PC 18:2\_20:1) / PC aa C38:3  
Shapiro-Wilk Test of log quotients, pv: 0.06972; OK  
SW: ok; ANOVA: Comp. ~ Subject\_ID -> pv = 0; DIFFERENCE  
Wilcoxon: Challenge; fasting: 0.5; sport: 0.125; OLTT: 0.25

PC 18:0\_20:3 / PC aa C38:3  
Shapiro-Wilk Test of log quotients, pv: 2e-04; NO  
SW: ok; ANOVA: Comp. ~ Subject\_ID -> pv = 0; DIFFERENCE  
Wilcoxon: Challenge; fasting: 0.25; sport: 0.125; OLTT: 0.25

PC 18:1\_20:2 / PC aa C38:3  
Shapiro-Wilk Test of log quotients, pv: 0.11436; OK  
SW: ok; ANOVA: Comp. ~ Subject\_ID -> pv = 0; DIFFERENCE  
Wilcoxon: Challenge; fasting: 0.125; sport: 1; OLTT: 0.375

PC 18:2\_20:1 / PC aa C38:3  
Shapiro-Wilk Test of log quotients, pv: 0; NO  
SW: no; Kruskal: Comp. ~ Subject\_ID -> pv = 0; DIFFERENCE  
Wilcoxon: Challenge; fasting: 0.5; sport: 0.25; OLTT: 0.875

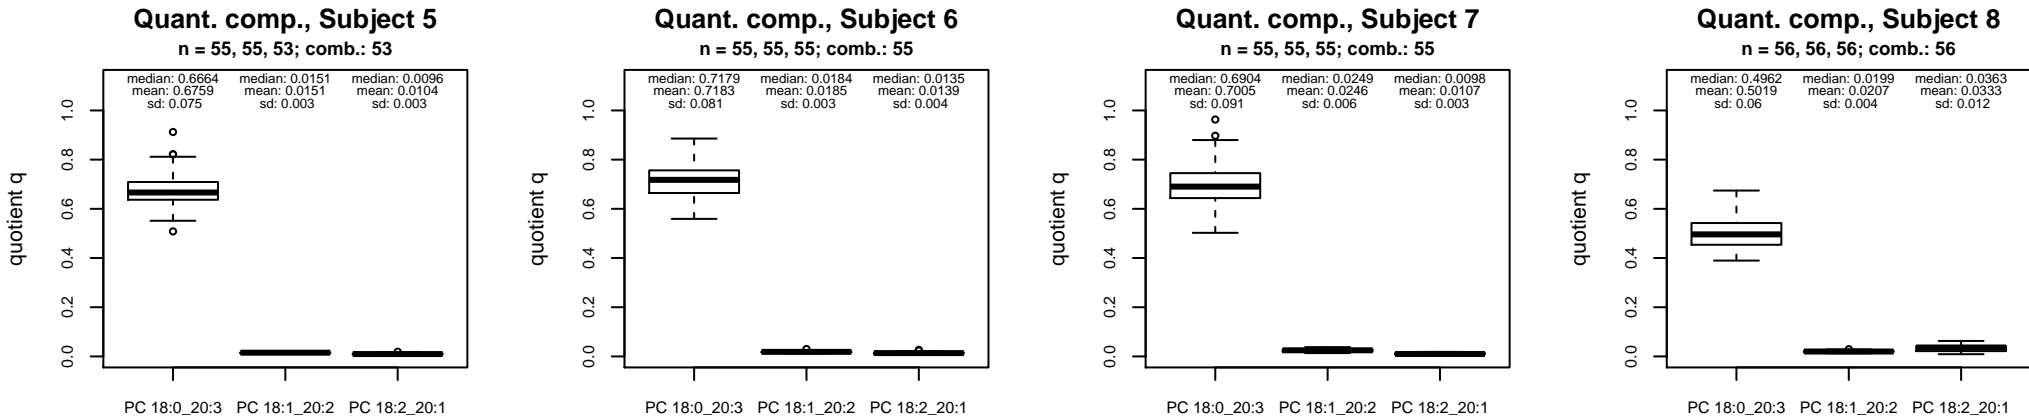

Trends of proportions q during challenges

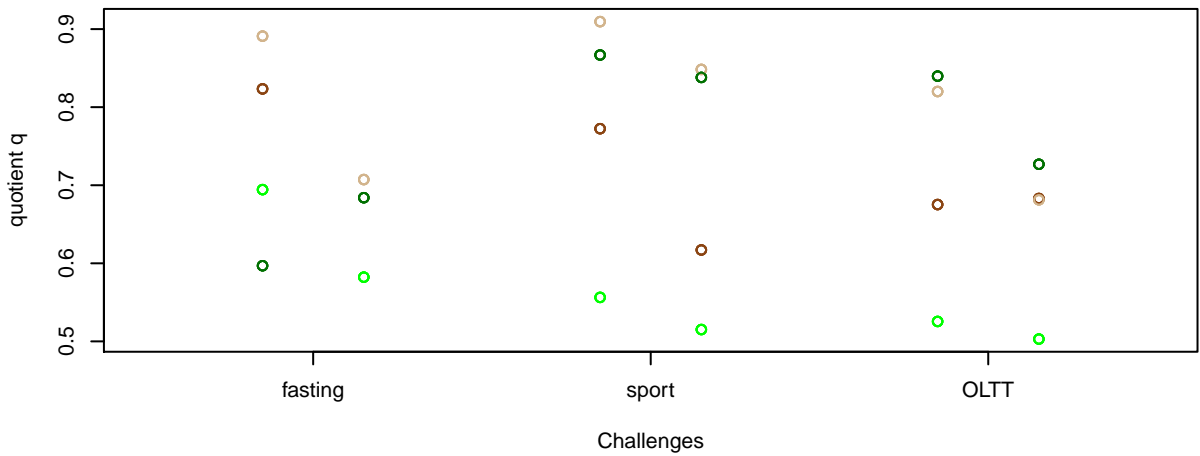

Proportions q per time point

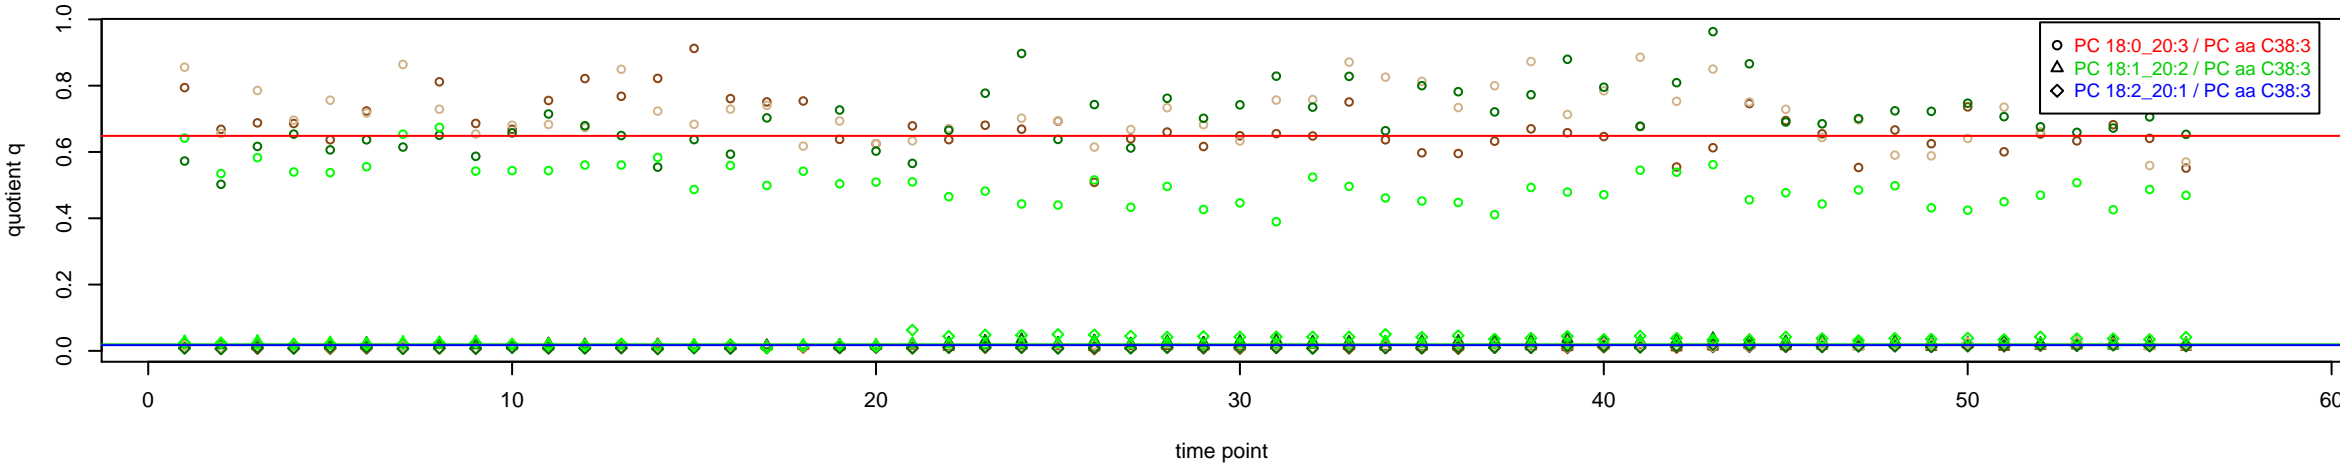







PC aa C38:6 = PC 16:0\_22:6 + PC 18:1\_20:5 + PC 18:2\_20:4 + R

PC 18:1\_20:5 excluded because of missingness > 75%

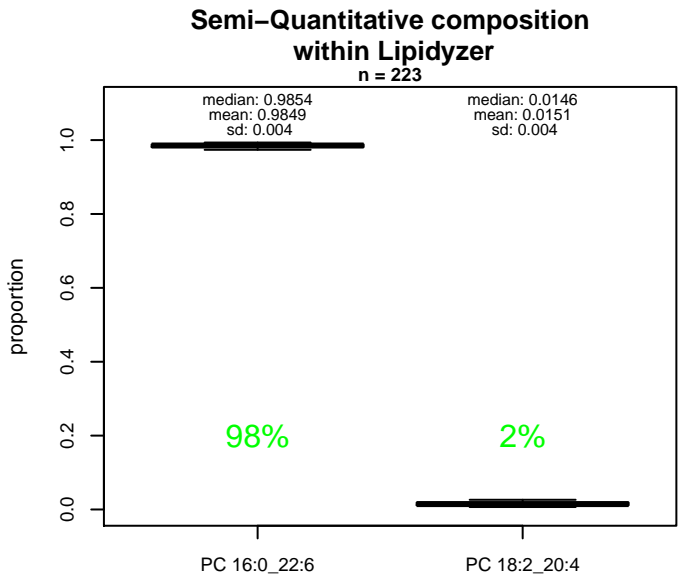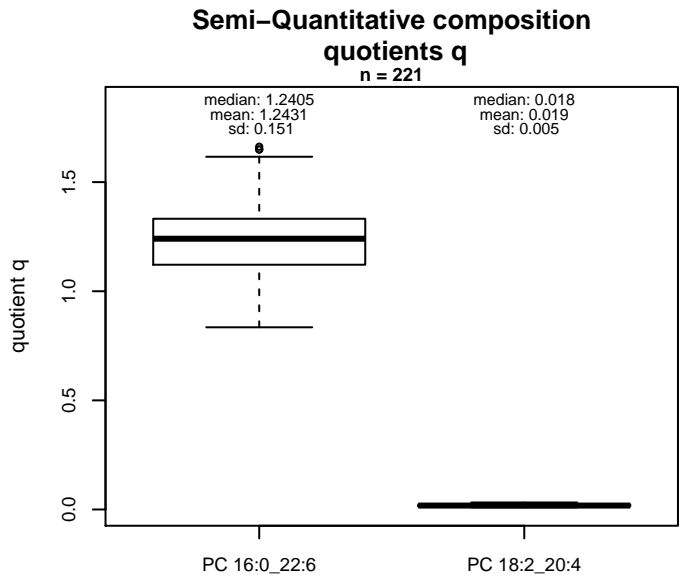

Semi-Quantitative composition: Lipidzyer

PC aa C38:6 consists of:

PC 16:0\_22:6 98.5%

PC 18:2\_20:4 1.5%

and of (not quantified):

PC 18:1\_20:5, PC 16:1\_22:5, PC 18:3\_20:3, PC 18:4\_20:2,

and further compounds

Composition: mean of proportions q

$\text{conc}(\text{PC aa C38:6}) * 1.2431 = \text{conc}(\text{PC 16:0_22:6})$  [var(q)=1.2431]

Percentiles: 5%→1.0168, 25%→1.1214, 75%→1.3321, 95%→1.5009

$\text{conc}(\text{PC aa C38:6}) * 0.019 = \text{conc}(\text{PC 18:2_20:4})$  [var(q)=0.019]

Percentiles: 5%→0.0118, 25%→0.0148, 75%→0.0234, 95%→0.0279

Linear model

$\text{PC aa C38:6} \sim b * (\text{PC 16:0_22:6} + \text{PC 18:2_20:4})$

b = 0.71118

R<sup>2</sup> = 0.77057

Ranges

| Measure | AbsoluteIDQ | sum(Lipidzyer) | delta |
|---------|-------------|----------------|-------|
| Min     | 50.4        | 67.49          | 17.09 |
| Max     | 141.6       | 188.25         | 46.65 |
| Mean    | 87.19       | 109.18         | 21.99 |
| Median  | 82.9        | 100.57         | 17.67 |
| SD      | 21.12       | 26.01          | 4.89  |

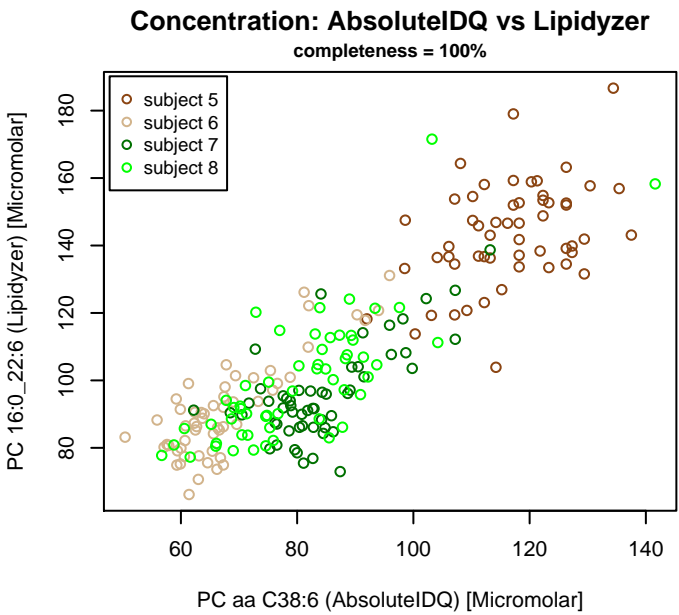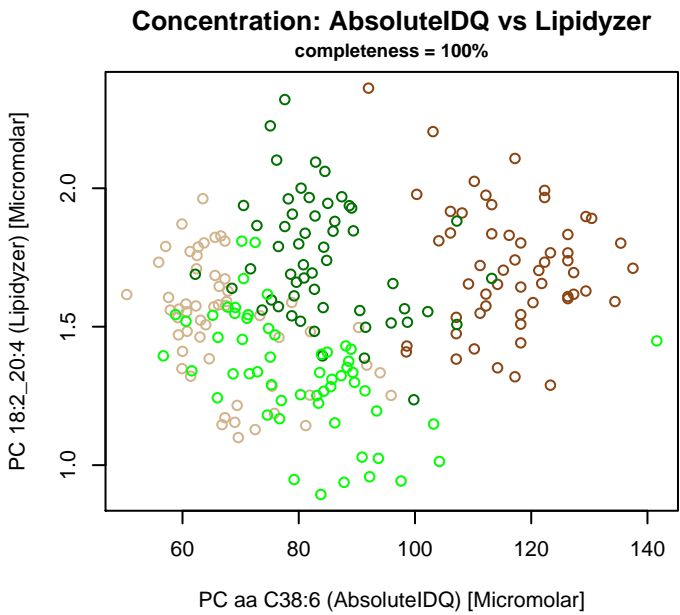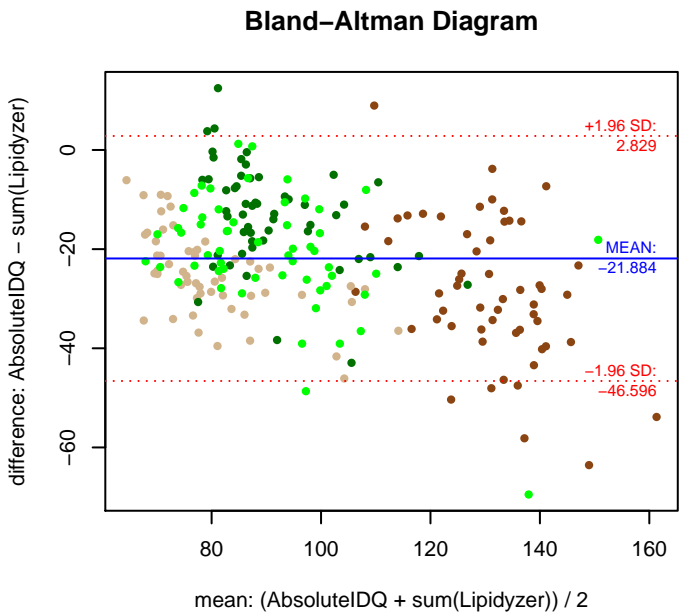

Stability of composition

(PC 16:0\_22:6 + PC 18:2\_20:4) / PC aa C38:6  
Shapiro-Wilk Test of log quotients, pv: 0.86063; OK  
SW: ok; ANOVA: Comp. ~ Subject\_ID -> pv = 0.06938; EQUAL  
Wilcoxon: Challenge; fasting: 0.625; sport: 0.625; OLTT: 0.25

PC 16:0\_22:6 / PC aa C38:6  
Shapiro-Wilk Test of log quotients, pv: 0.79949; OK  
SW: ok; ANOVA: Comp. ~ Subject\_ID -> pv = 0.05839; EQUAL  
Wilcoxon: Challenge; fasting: 0.625; sport: 0.625; OLTT: 0.25

PC 18:2\_20:4 / PC aa C38:6  
Shapiro-Wilk Test of log quotients, pv: 0.00068; NO  
SW: no; Kruskal: Comp. ~ Subject\_ID -> pv = 0; DIFFERENCE  
Wilcoxon: Challenge; fasting: 0.125; sport: 0.125; OLTT: 0.625

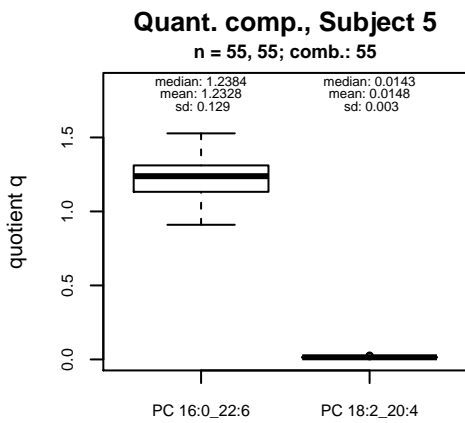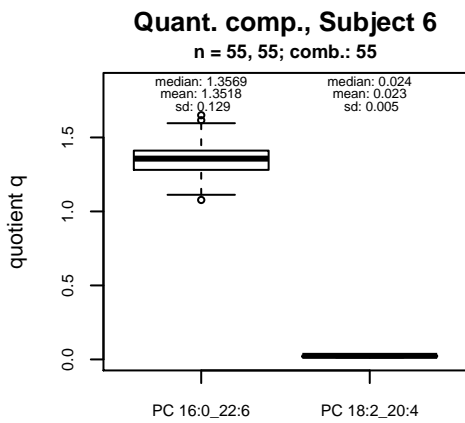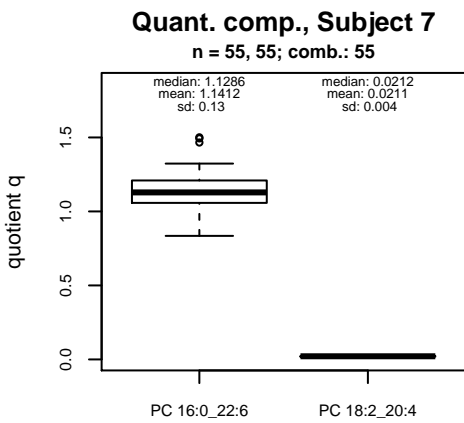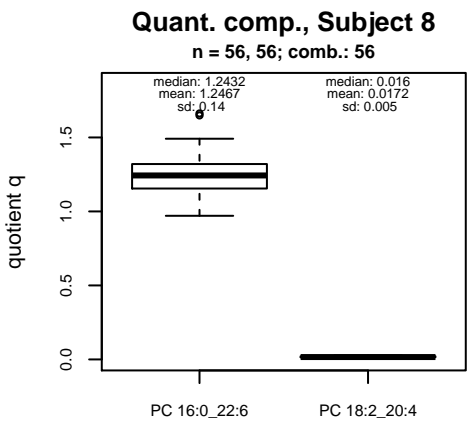

Trends of proportions q during challenges

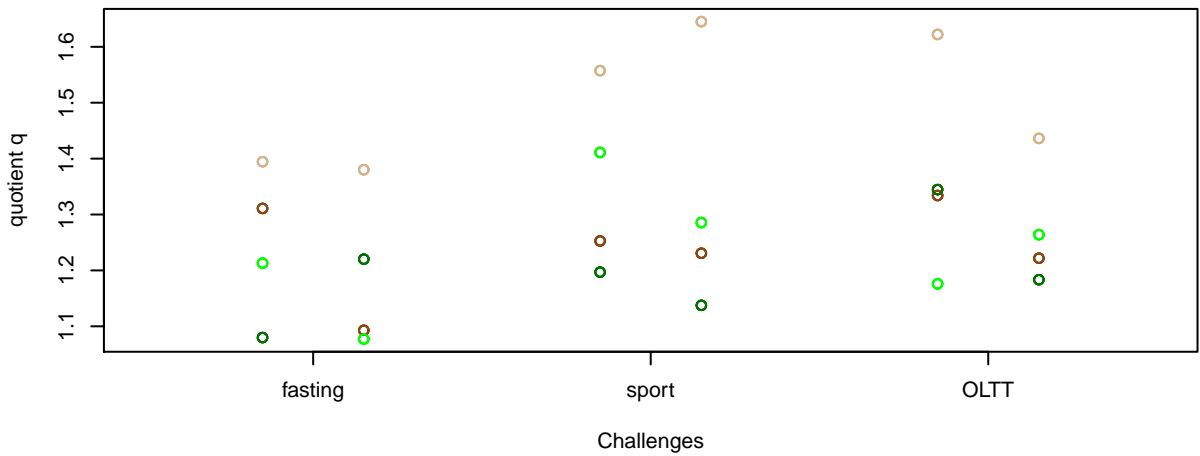

Proportions q per time point

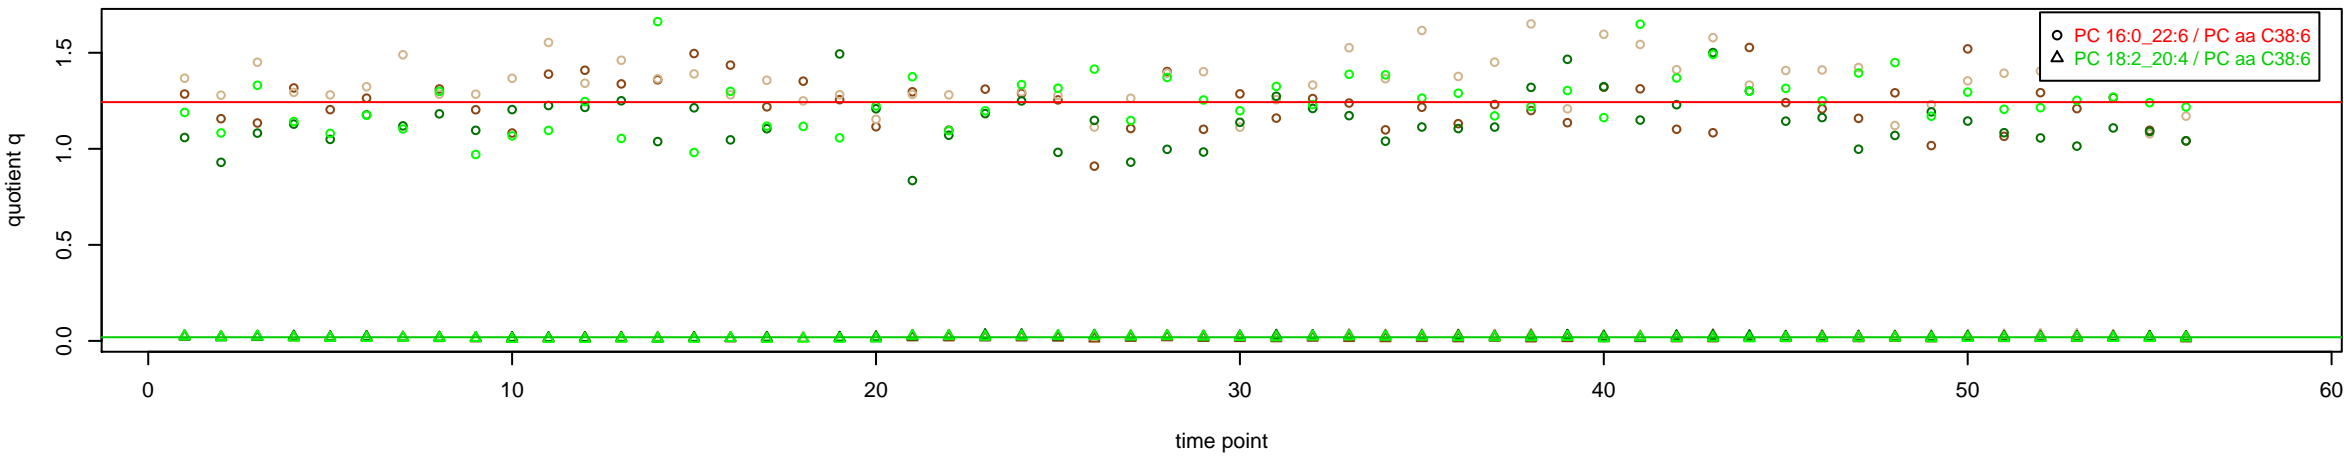

PC aa C40:1 = R

Qualitative composition

PC aa C40:1 consists of:  
PC 16:0\_24:1,    PC 18:0\_22:1,    PC 18:1\_22:0,    PC 19:1\_21:0,  
PC O-20:1\_21:0  
and further compounds

No independent Variable measured.

**PC aa C40:2 = PC 18:0\_22:2 + PC 18:1\_22:1 + R**

PC 18:0\_22:2, PC 18:1\_22:1 excluded because of missingness > 75%

**Qualitative composition**

PC aa C40:2 consists of:  
PC 18:0\_22:2,    PC 18:1\_22:1,    PC 16:1\_24:1,    PC 18:2\_22:0,  
PC 20:1\_20:1  
and further compounds

No independent Variable with  
coverage >0.25 out of PC 18:0\_22:2,  
PC 18:1\_22:1

PC aa C40:3 = PC 18:2\_22:1 + PC 20:0\_20:3 + R

PC 18:2\_22:1 excluded because of missingness > 75%

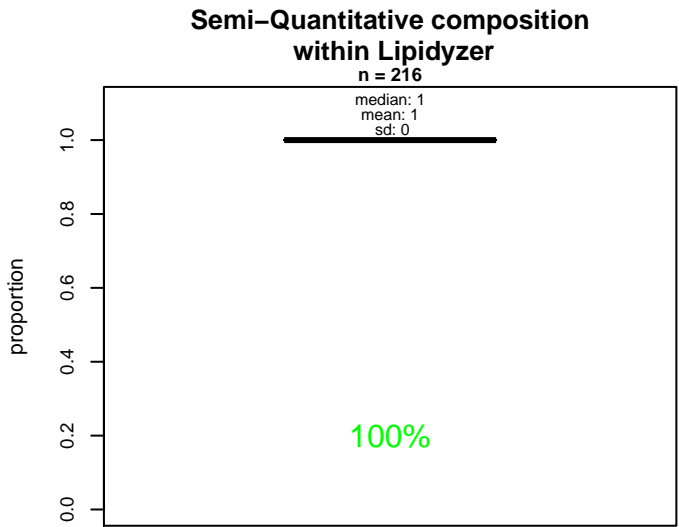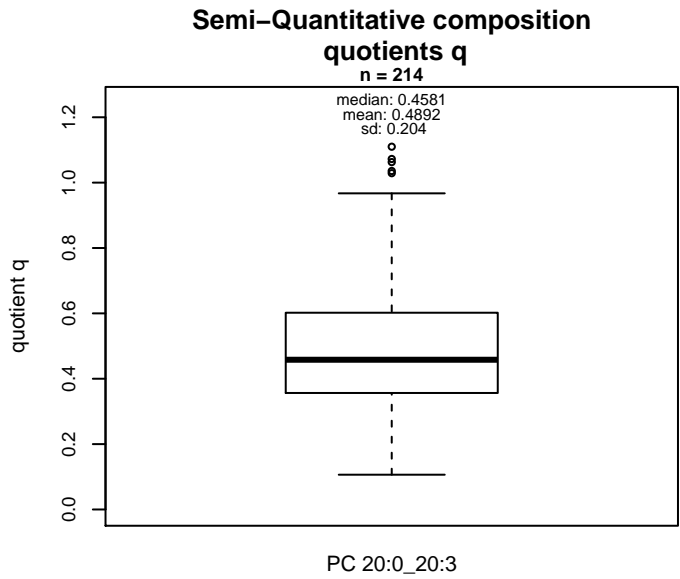

Semi-Quantitative composition: Lipidzyer

PC aa C40:3 consists of:  
PC 20:0\_20:3 100%  
and of (not quantified):  
PC 18:2\_22:1, PC 18:0\_22:3, PC 18:1\_22:2, PC 18:3\_22:0,  
PC 20:1\_20:2  
and further compounds

Composition: mean of proportions q

conc(PC aa C40:3) \* 0.4892 = conc(PC 20:0\_20:3) [var(q)=0.4892]  
Percentiles: 5%→0.198, 25%→0.3568, 75%→0.5993, 95%→0.8453

Linear model

PC aa C40:3 ~ b \* ( PC 20:0\_20:3 )

b = -0.06122

R<sup>2</sup> = 0.00209

Ranges

| Measure | AbsoluteIDQ | sum(Lipidzyer) | delta |
|---------|-------------|----------------|-------|
| Min     | 0.42        | 0.11           | 0.31  |
| Max     | 1.31        | 0.96           | 0.35  |
| Mean    | 0.77        | 0.36           | 0.41  |
| Median  | 0.73        | 0.32           | 0.41  |
| SD      | 0.19        | 0.14           | 0.05  |

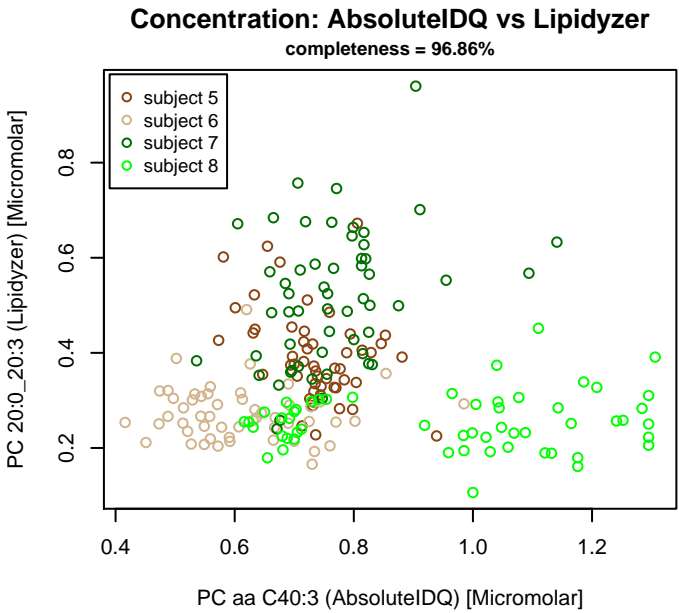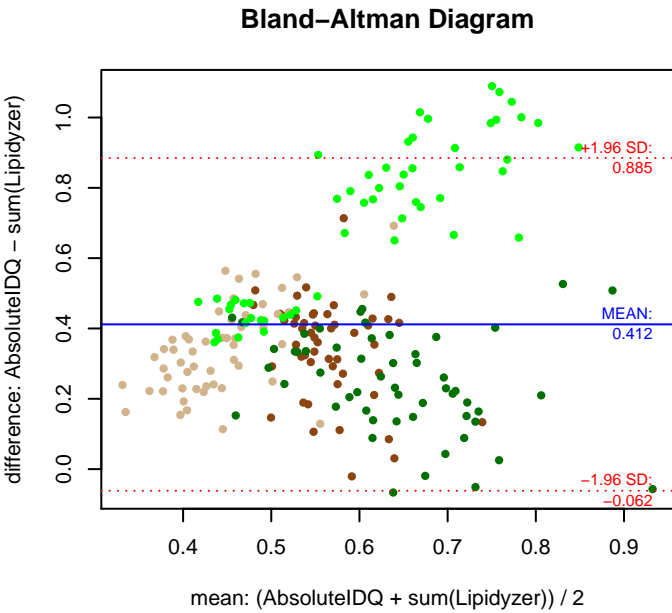

Stability of composition

PC 20:0\_20:3 / PC aa C40:3  
Shapiro-Wilk Test of log quotients, pv: 0.0089; NO  
SW: ok; ANOVA: Comp. ~ Subject\_ID -> pv = 0; DIFFERENCE  
Wilcoxon: Challenge; fasting: 1; sport: 0.375; OLTT: 0.125

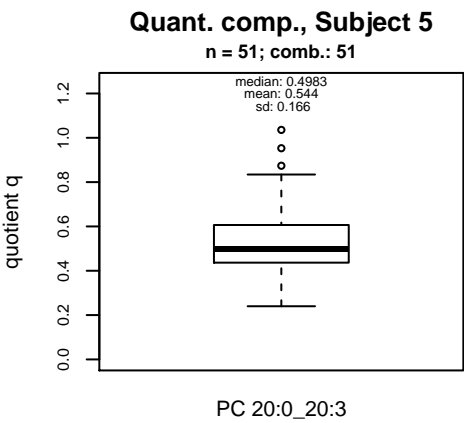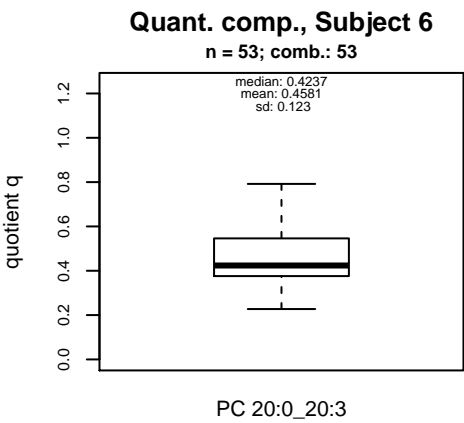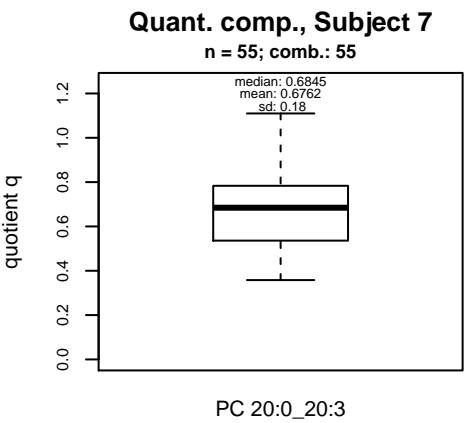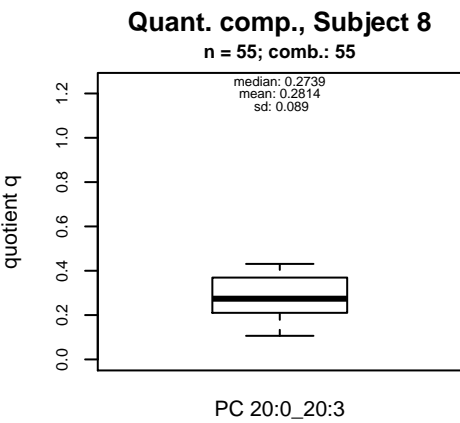

Trends of proportions q during challenges

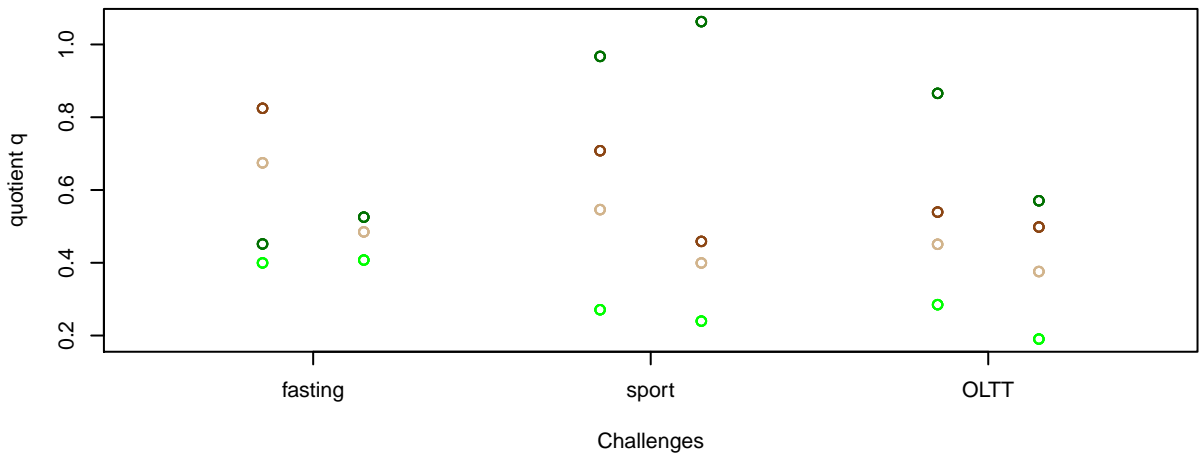

Proportions q per time point

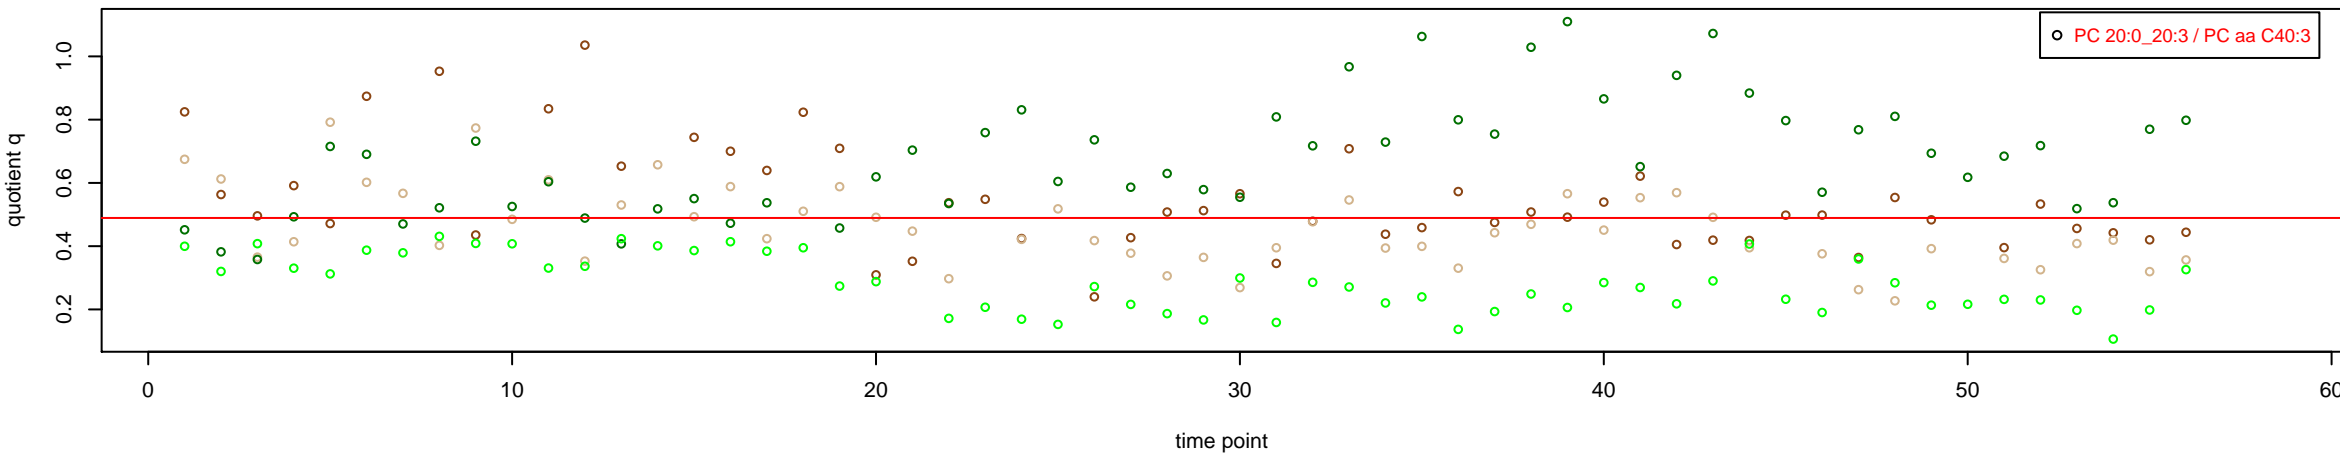

**PC aa C40:4 = PC 18:0\_22:4 + PC 20:0\_20:4 + R**

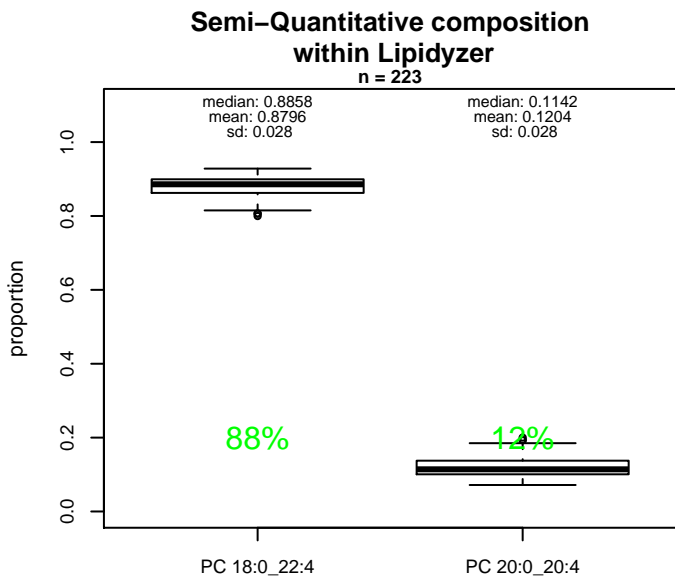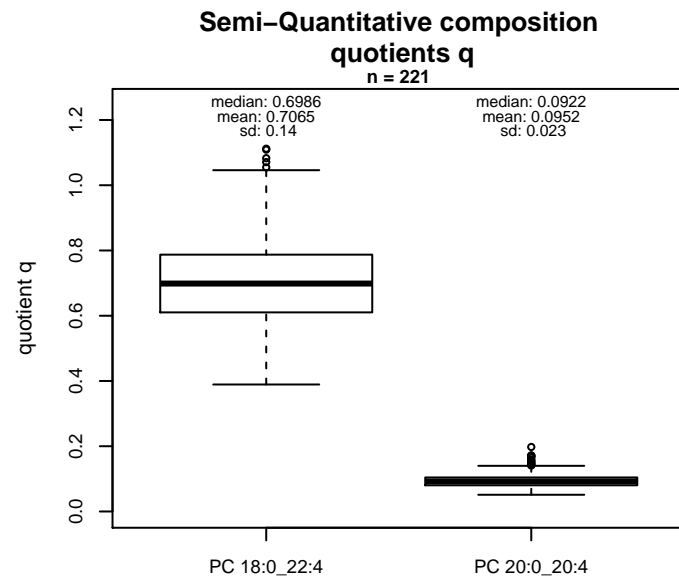

### Semi-Quantitative composition: Lipidizer

PC aa C40:4 consists of:

PC 18:0\_22:4 88%

PC 20:0\_20:4 12%

and of (not quantified):

PC 18:2\_22:2, PC 18:3\_22:1, PC 18:4\_22:0, PC 20:1\_20:3,

PC 20:2\_20:2

and further compounds

**Composition: mean of proportions  $q$**

$$\text{conc}(\text{PC aa C40:4}) * 0.7065 = \text{conc}(\text{PC 18:0\_22:4}) \quad [\text{var}(q)=0.7065]$$

Percentiles: 5%→0.4936, 25%→0.6103, 75%→0.7872, 95%→0.9503

$$\text{conc(PC aa C40:4)} * 0.0952 = \text{conc(PC 20:0\_20:4)} \quad [\text{var(q)}=0.0952]$$

Percentiles: 5%→0.0644, 25%→0.0803, 75%→0.1044, 95%→0.1461

## Linear model

$$PC_{aa\ C40:4} \sim b * (PC_{18:0\_22:4} + PC_{20:0\_20:4})$$
$$b = 0.82589$$
$$R^2 = 0.67225$$

## Ranges

| Measure | AbsoluteI <sub>DQ</sub> | sum(Lipidyzer) | delta |
|---------|-------------------------|----------------|-------|
| Min     | 1.84                    | 1.08           | 0.76  |
| Max     | 5.56                    | 6.11           | 0.55  |
| Mean    | 3.46                    | 2.79           | 0.67  |
| Median  | 3.25                    | 2.85           | 0.4   |
| SD      | 0.89                    | 0.88           | 0     |

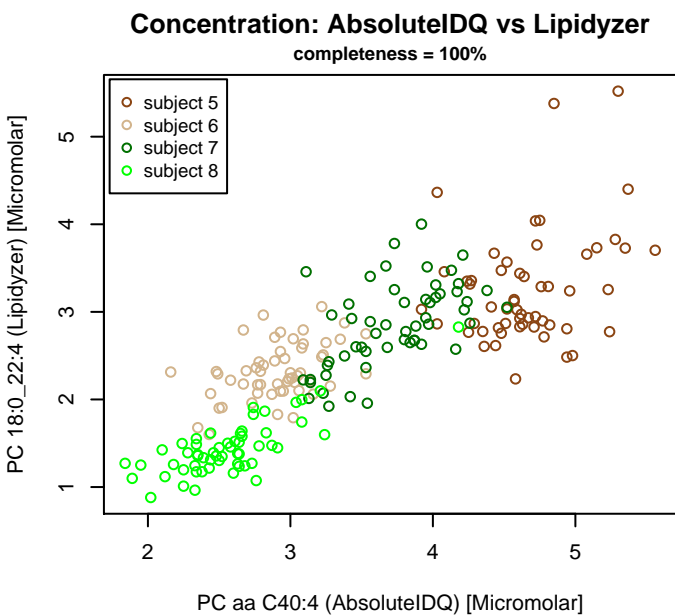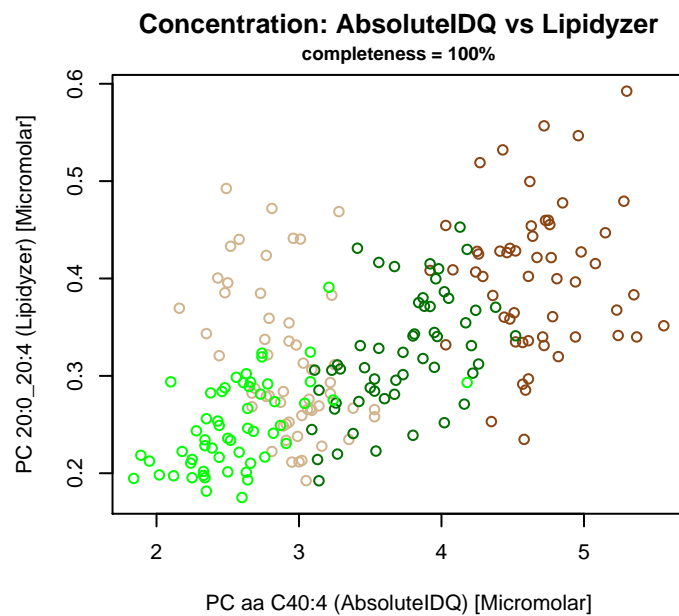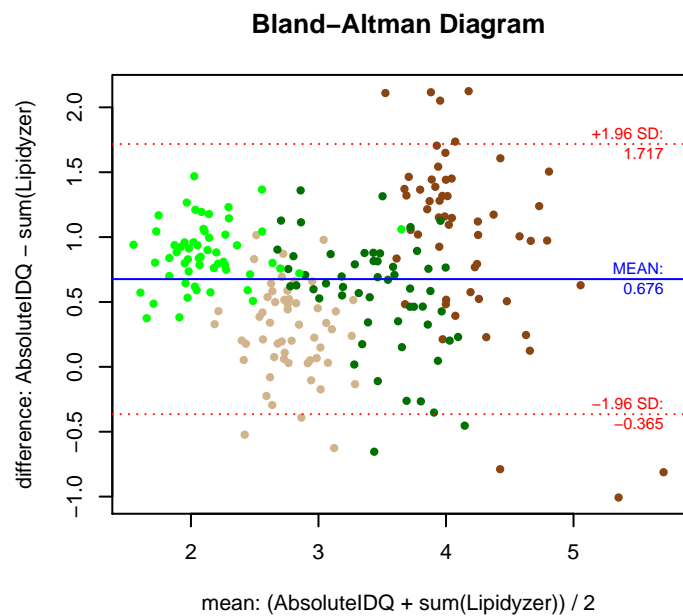

## Stability of composition

(PC 18:0\_22:4 + PC 20:0\_20:4) / PC aa C40:4  
Shapiro-Wilk Test of log quotients, pv: 0.92811; OK  
SW: ok; ANOVA: Comp. ~ Subject\_ID -> pv = 0; DIFFERENCE  
Wilcoxon: Challenge; fasting: 0.25; sport: 0.875; OLTT: 0.125

PC 18:0\_22:4 / PC aa C40:4  
Shapiro-Wilk Test of log quotients, pv: 0.64098; OK  
SW: ok; ANOVA: Comp. ~ Subject\_ID -> pv = 0; DIFFERENCE  
Wilcoxon: Challenge; fasting: 0.25; sport: 0.875; OLTT: 0.125

PC 20:0\_20:4 / PC aa C40:4  
Shapiro-Wilk Test of log quotients, pv: 0.00125; NO  
SW: ok; ANOVA: Comp. ~ Subject\_ID -> pv = 0.19594; EQUAL  
Wilcoxon: Challenge; fasting: 0.375; sport: 1; OLTT: 0.25

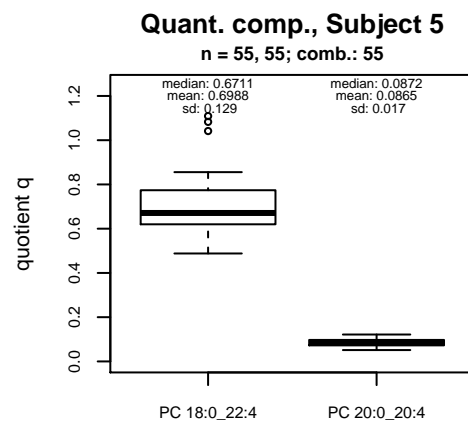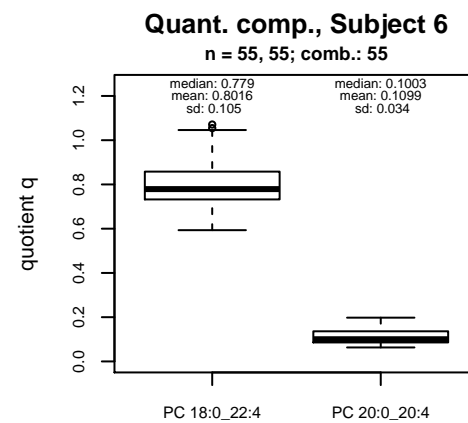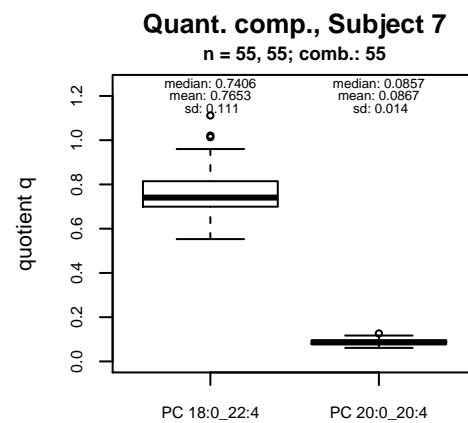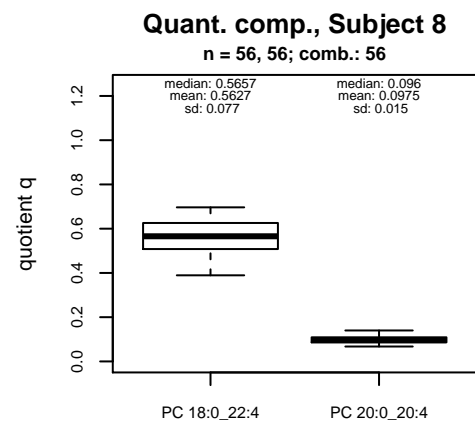

### Trends of proportions $q$ during challenges

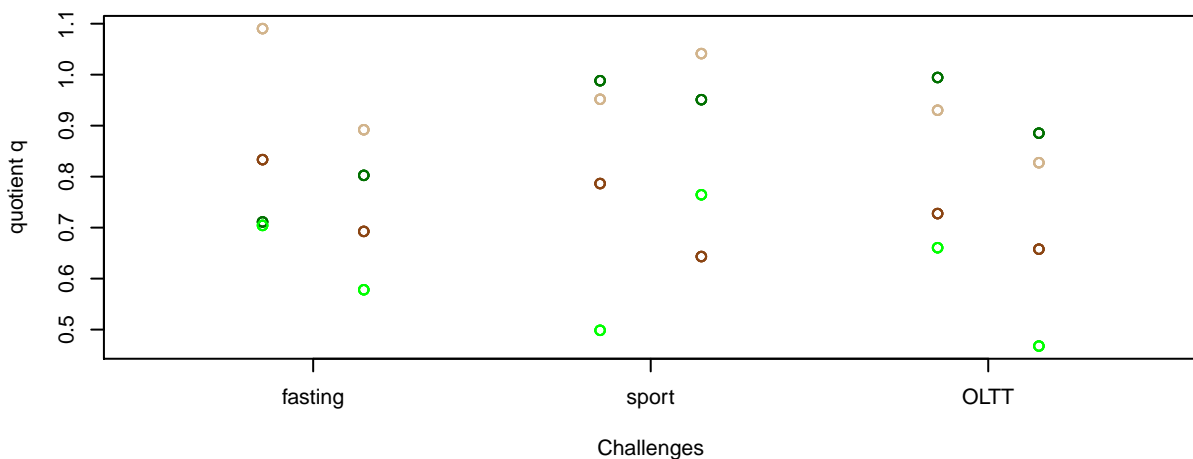

### Proportions q per time point

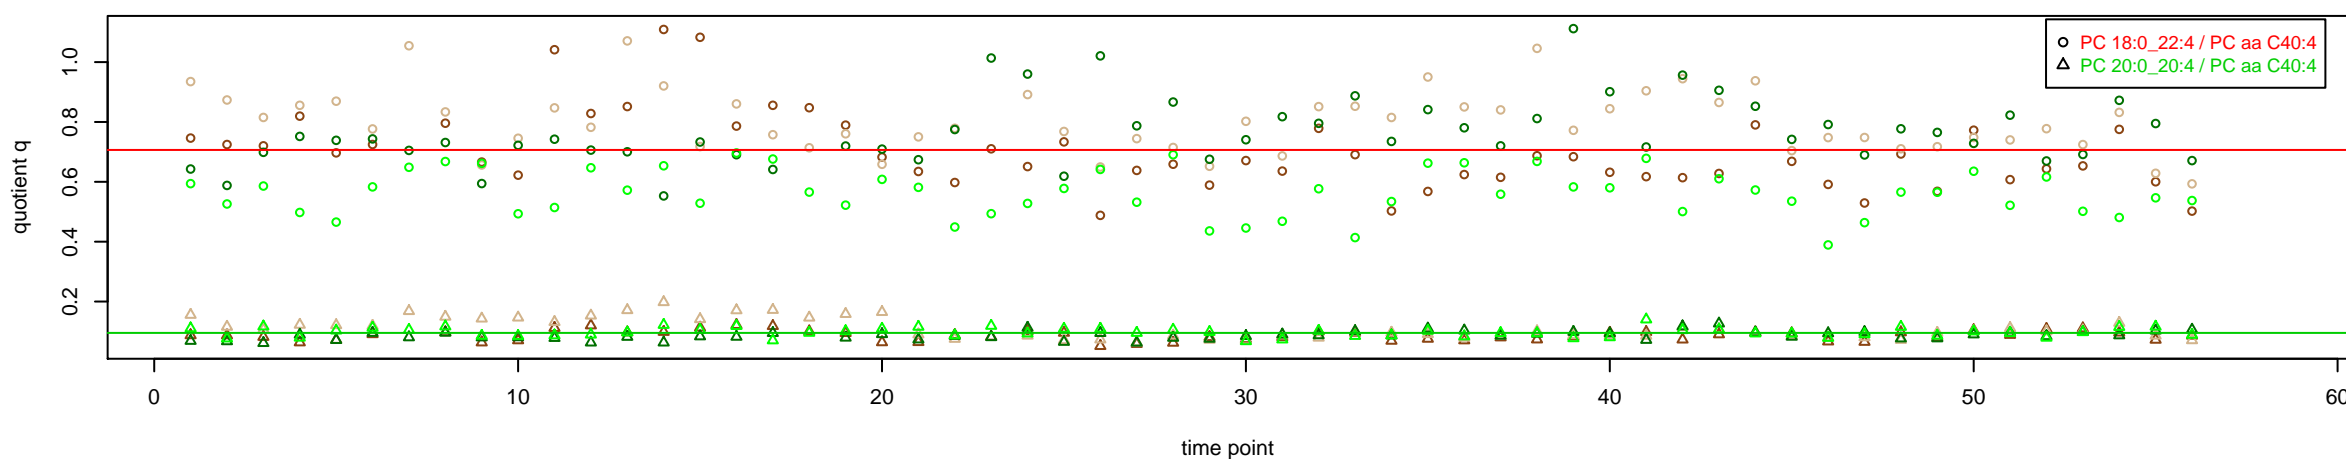



PC aa C40:5 = PC 18:0\_22:5 + PC 18:1\_22:4 + R

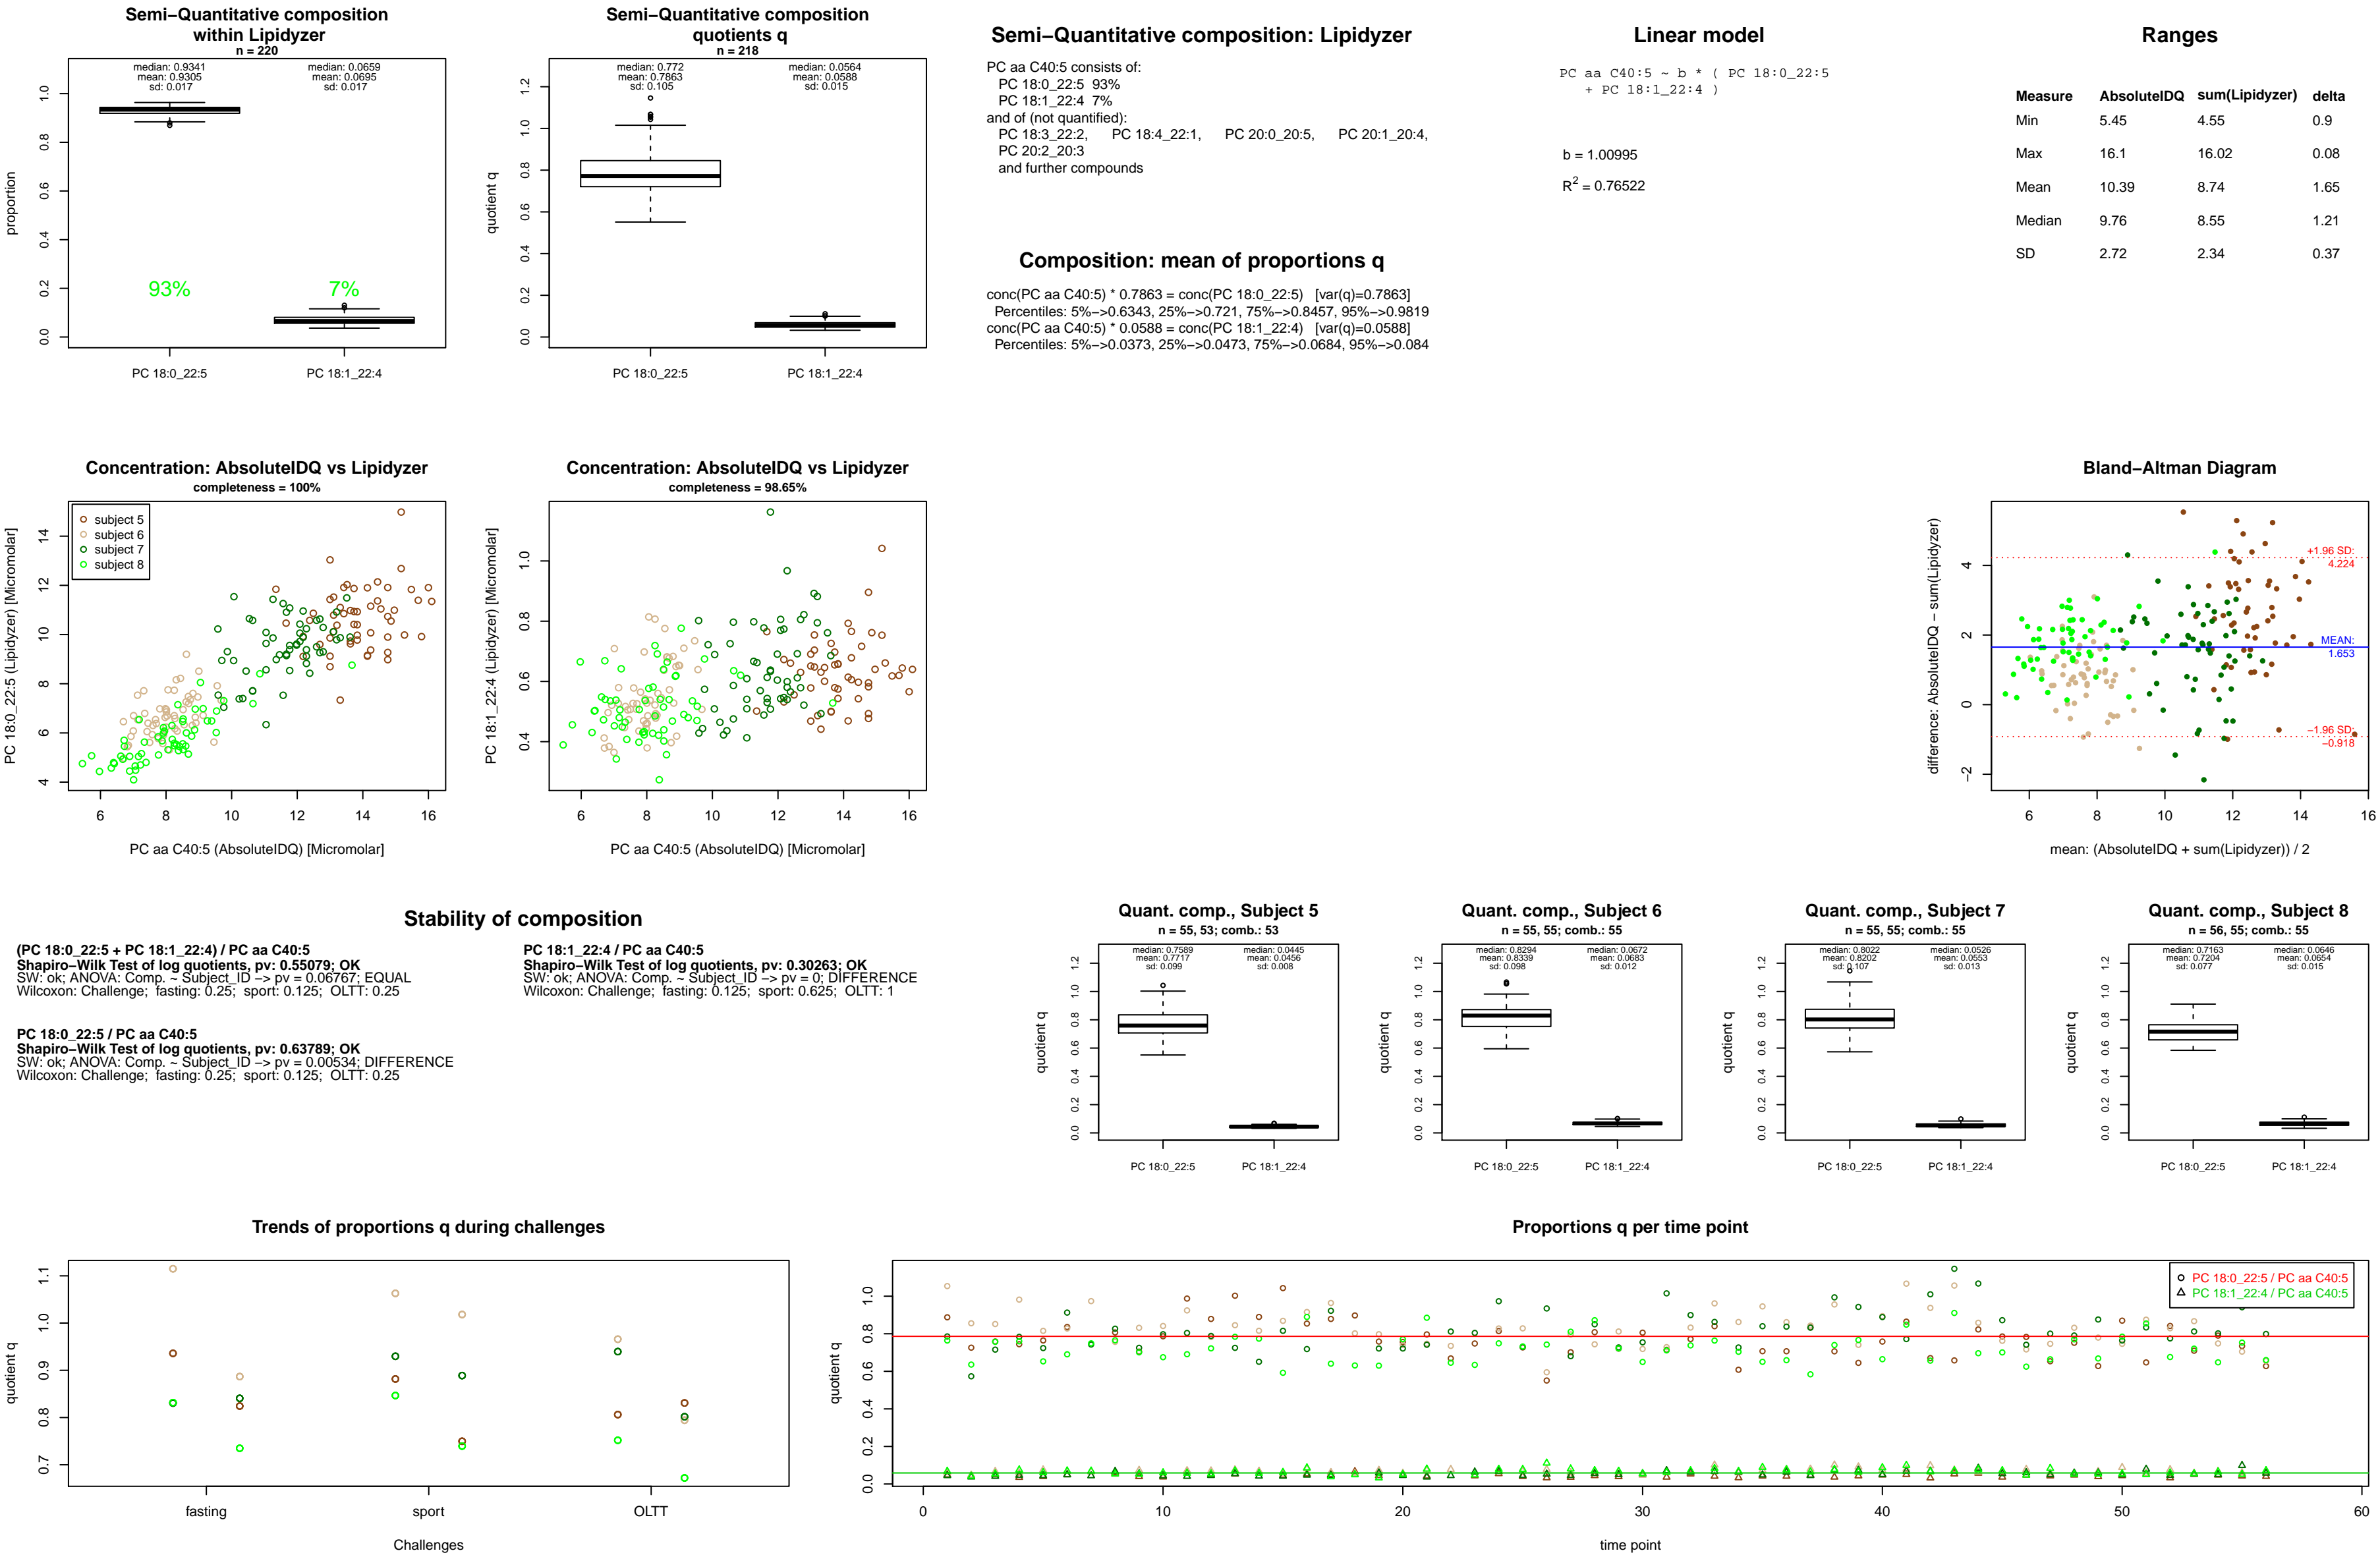

$$\text{PC aa C40:6} = \text{PC 18:0\_22:6} + \text{PC 18:1\_22:5} + \text{PC 18:2\_22:4} + \text{R}$$

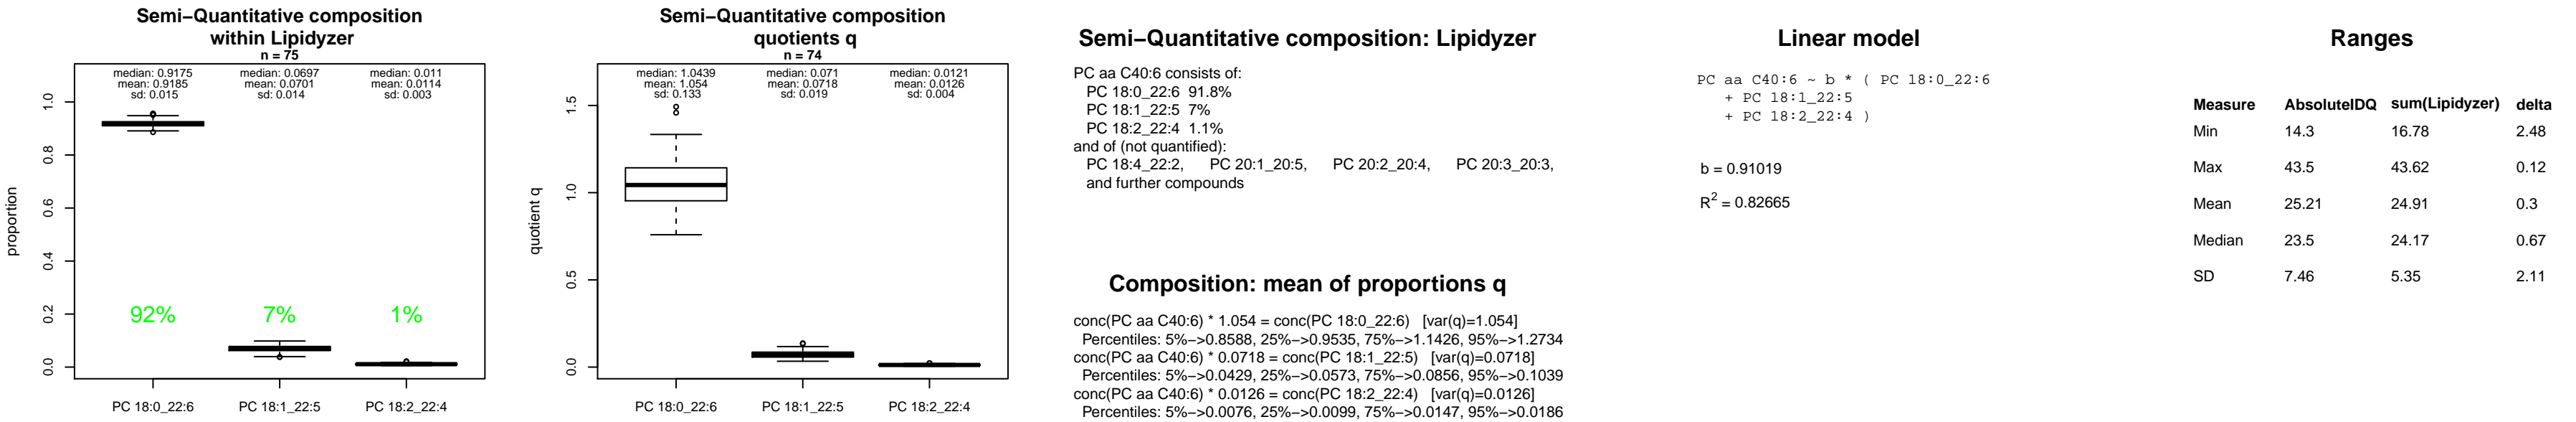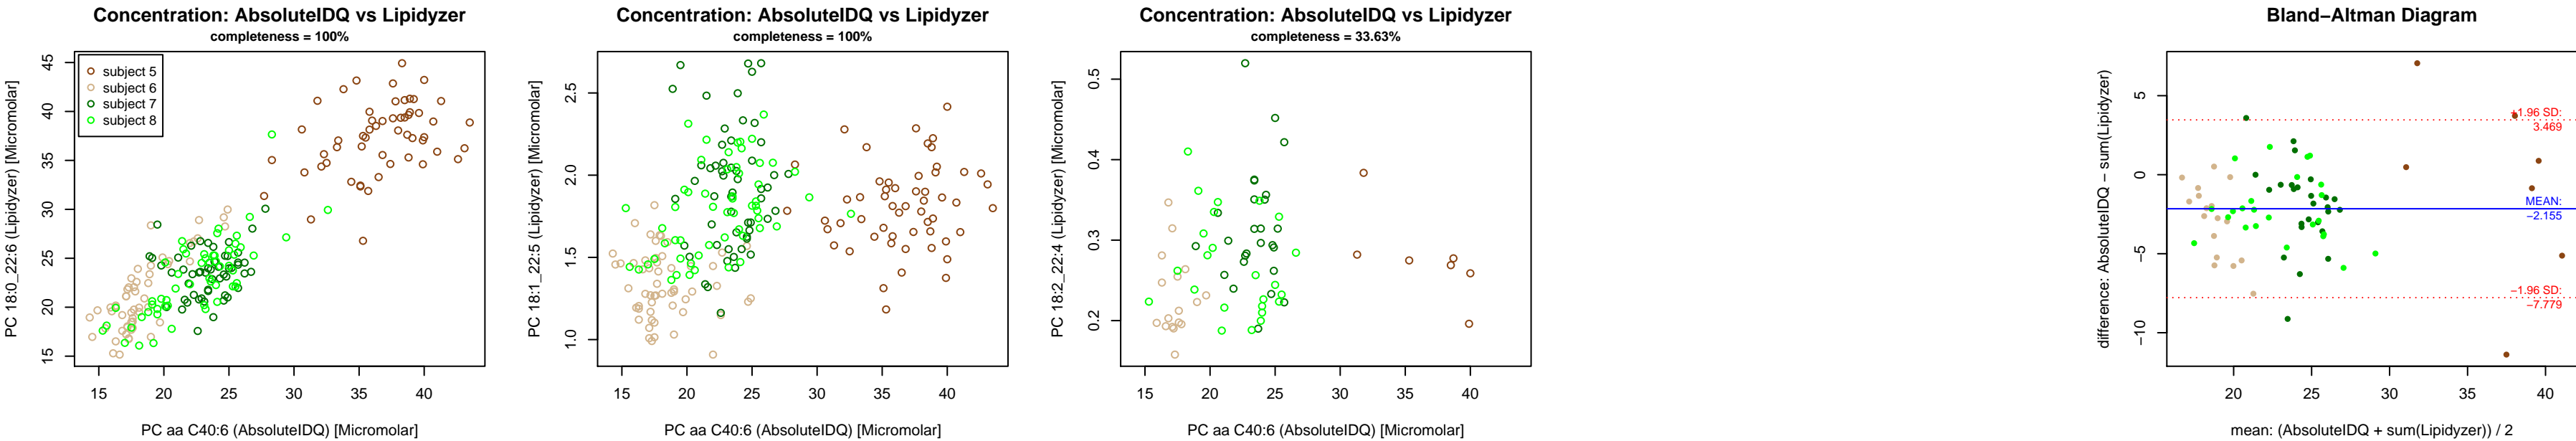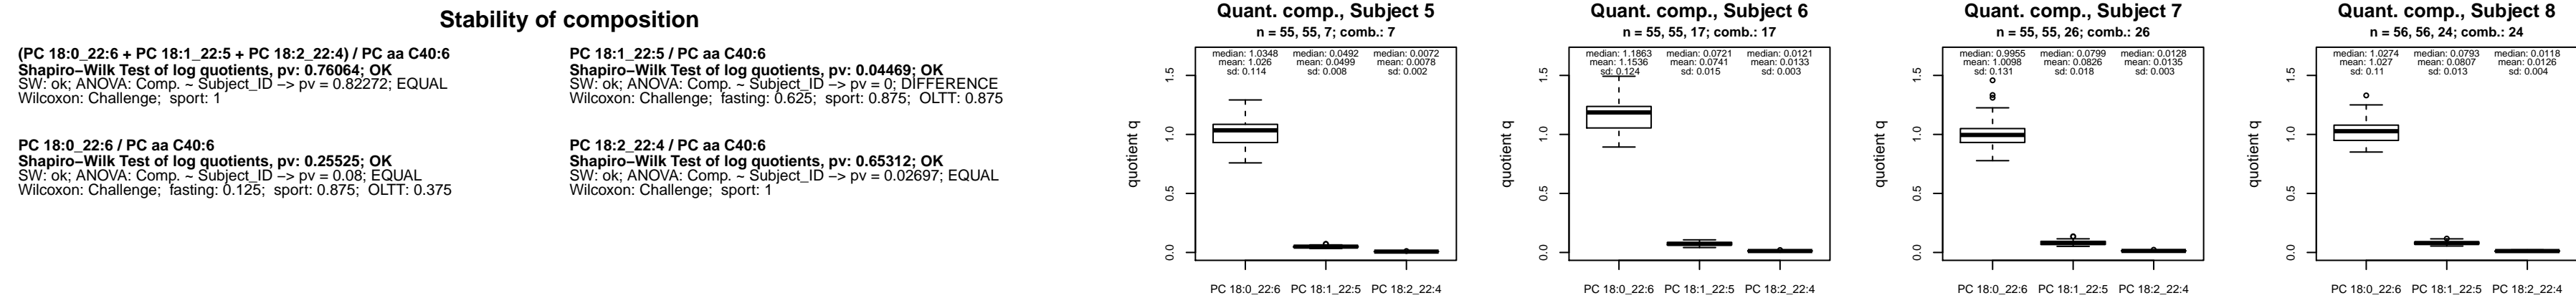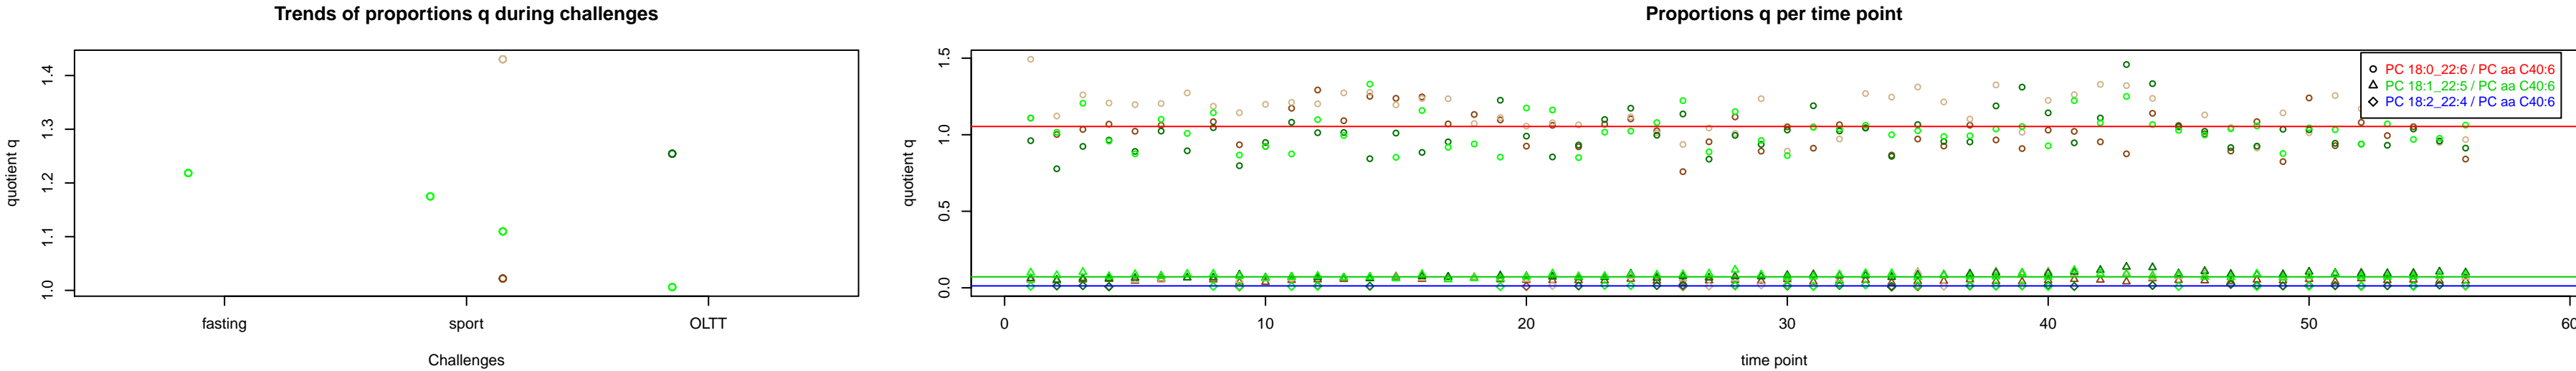

PC aa C42:0 = R

Qualitative composition

PC aa C42:0 consists of:  
PC 16:0\_26:0,    PC 18:0\_24:0,    PC 20:0\_22:0,    PC 21:0\_21:0,  
and further compounds

No independent Variable measured.

PC aa C42:1 = R

Qualitative composition

PC aa C42:1 consists of:  
PC 18:0\_24:1,    PC 18:1\_24:0,    PC 20:0\_22:1,    PC 20:1\_22:0,  
and further compounds

No independent Variable measured.

PC aa C42:2 = R

Qualitative composition

PC aa C42:2 consists of:  
PC 16:0\_26:2,    PC 18:1\_24:1,    PC 18:2\_24:0,    PC 20:0\_22:2,  
PC 20:2\_22:0  
and further compounds

No independent Variable measured.

PC aa C42:4 = R

Qualitative composition

PC aa C42:4 consists of:  
PC 18:3\_24:1,    PC 18:4\_24:0,    PC 20:0\_22:4,    PC 20:2\_22:2,  
PC 20:4\_22:0  
and further compounds

No independent Variable measured.



**PC aa C42:5 = PC 20:0\_22:5 + R**

PC 20:0\_22:5 excluded because of missingness > 75%

**Qualitative composition**

PC aa C42:5 consists of:  
PC 20:0\_22:5,    PC 20:1\_22:4,    PC 20:3\_22:2,    PC 20:4\_22:1,  
PC 20:5\_22:0  
and further compounds

No independent Variable with  
coverage >0.25 out of PC 20:0\_22:5

PC aa C42:6 = PC 20:0\_22:6 + R

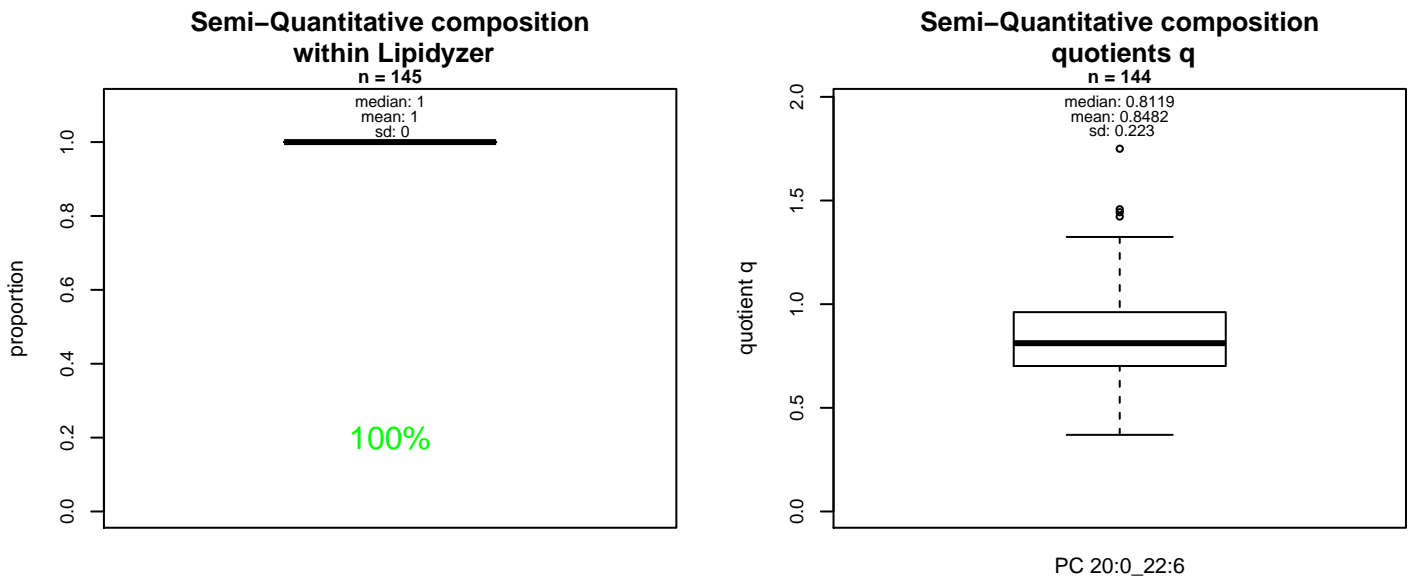

Semi-Quantitative composition: Lipidzyzer

PC aa C42:6 consists of:  
PC 20:0\_22:6 100%  
and of (not quantified):  
PC 20:5\_22:1  
and further compounds

Composition: mean of proportions q

conc(PC aa C42:6) \* 0.8482 = conc(PC 20:0\_22:6) [var(q)=0.8482]  
Percentiles: 5%→0.5587, 25%→0.703, 75%→0.9614, 95%→1.2468

Linear model

PC aa C42:6 ~ b \* ( PC 20:0\_22:6 )

b = 0.21904

R<sup>2</sup> = 0.05859

Ranges

| Measure | AbsolutelDQ | sum(Lipidzyzer) | delta |
|---------|-------------|-----------------|-------|
| Min     | 0.41        | 0.27            | 0.14  |
| Max     | 0.97        | 0.86            | 0.11  |
| Mean    | 0.69        | 0.58            | 0.11  |
| Median  | 0.69        | 0.57            | 0.13  |
| SD      | 0.13        | 0.13            | 0     |

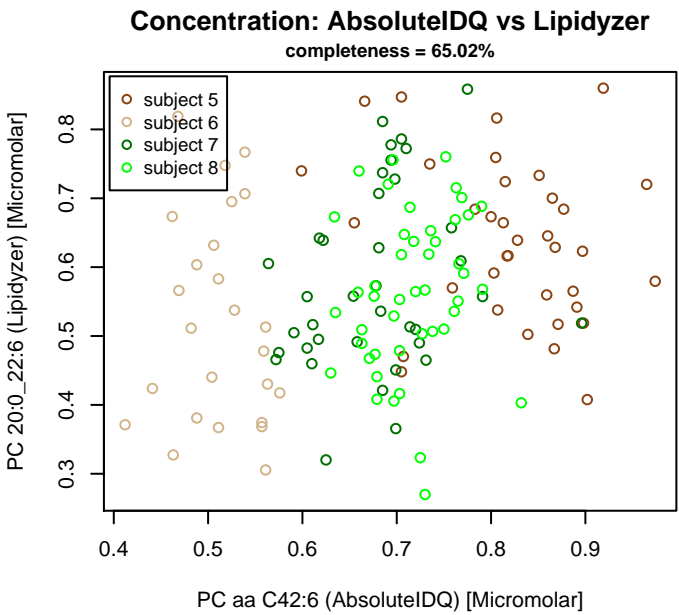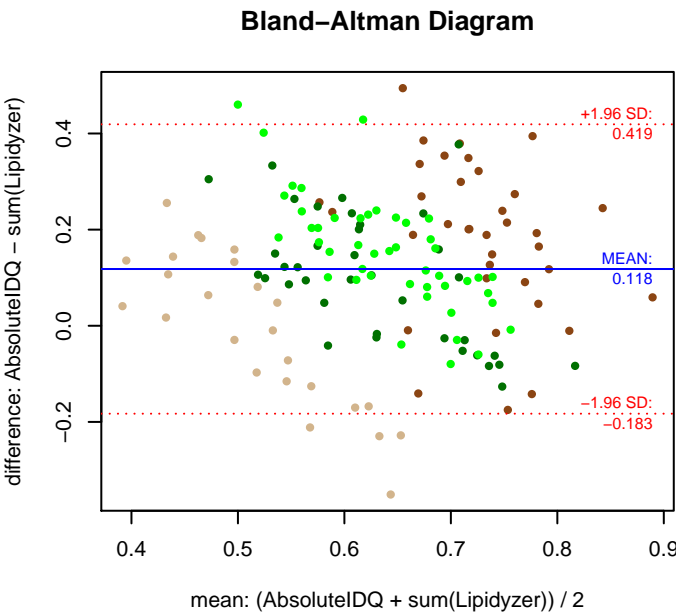

Stability of composition

PC 20:0\_22:6 / PC aa C42:6  
Shapiro-Wilk Test of log quotients, pv: 0.79973; OK  
SW: no; Kruskal: Comp. ~ Subject\_ID → pv = 0.00367; DIFFERENCE  
Wilcoxon: Challenge; fasting: 0.5; sport: 1; OLTT: 1

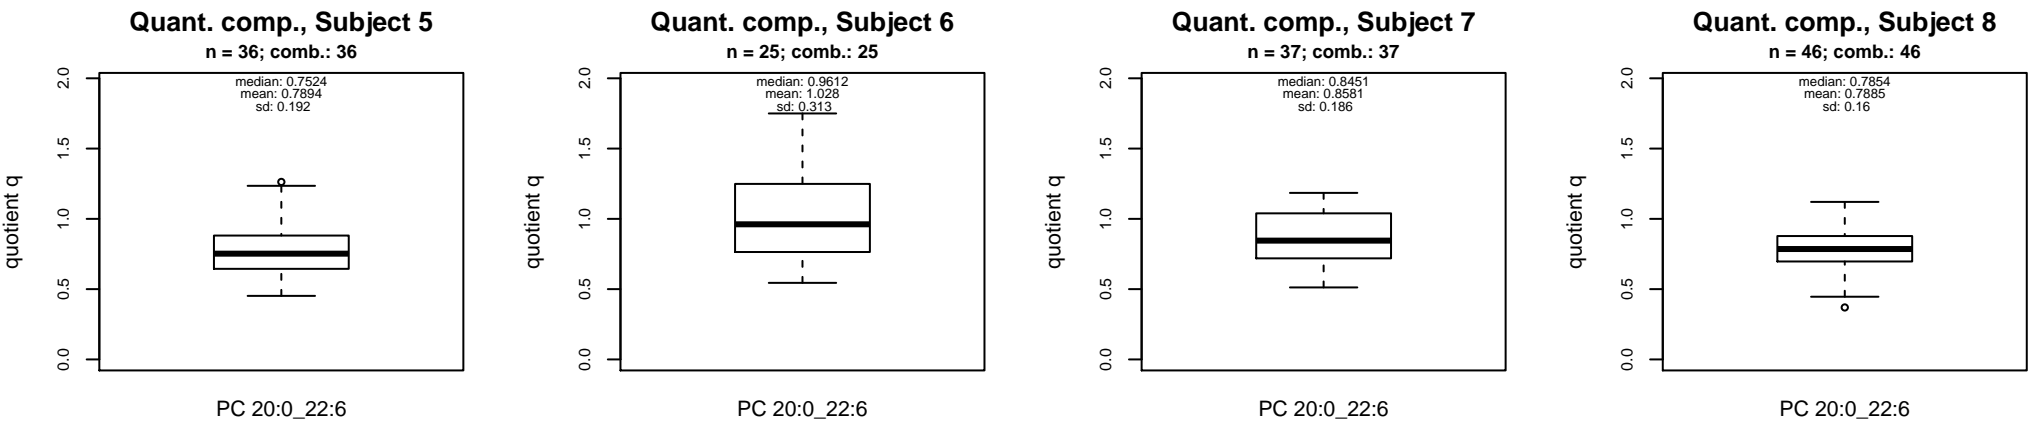

Trends of proportions q during challenges

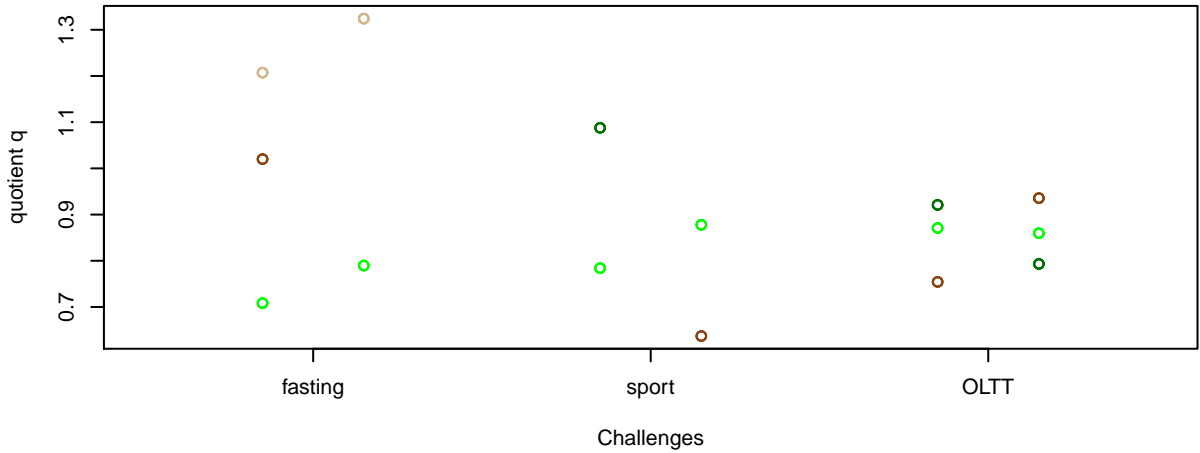

Proportions q per time point

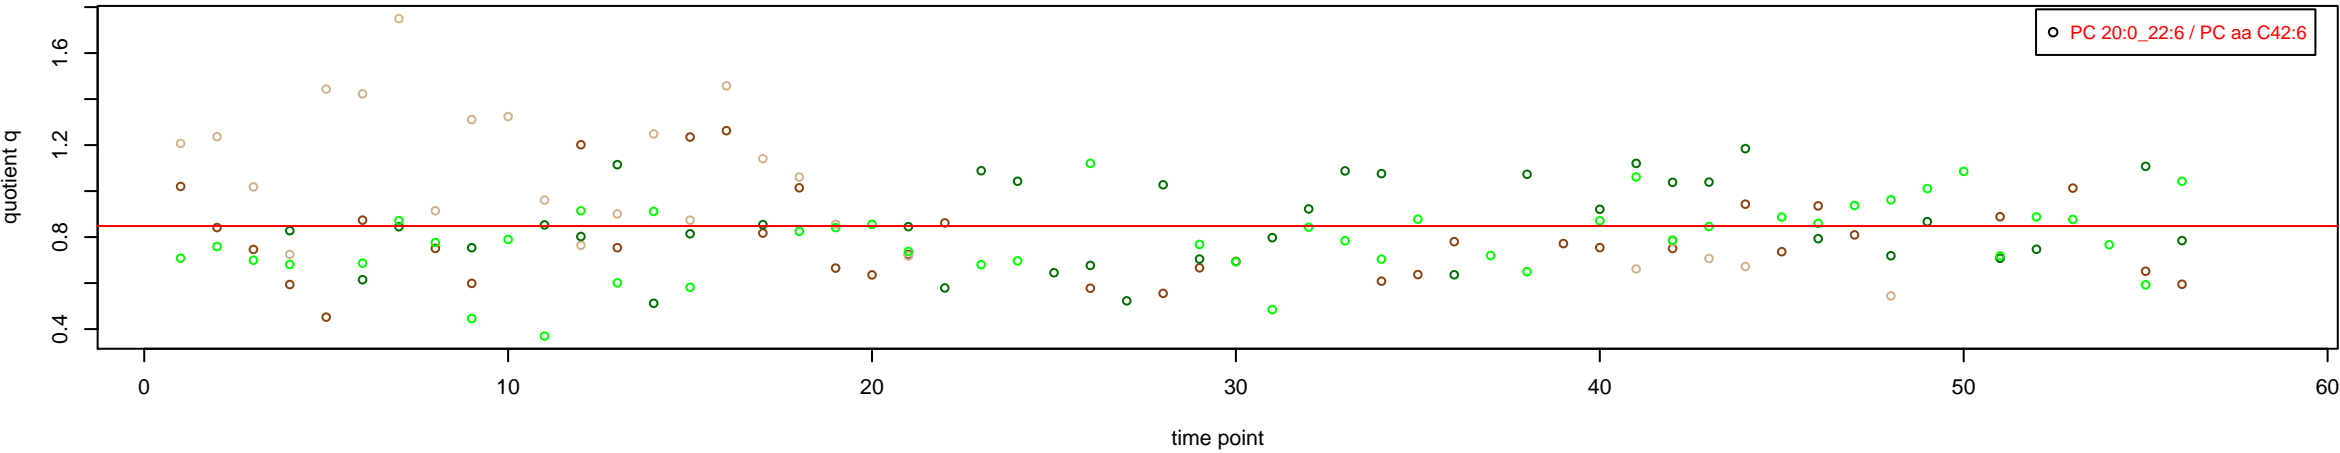

PC ae C30:0 = R

Qualitative composition

PC ae C30:0 consists of:  
PC O-14:0\_16:0,    PC O-18:0\_12:0,    PC 10:0\_19:0,    PC 12:0\_1  
PC 13:0\_16:0,    PC 14:0\_15:0,    PC 20:0\_9:0,    PC 8:0\_21:0,  
[13C1]SM 33:0  
and further compounds

No independent Variable measured.

**PC ae C32:1 = PC 15:0\_16:1 + PC 17:0\_14:1 + R**

PC 15:0\_16:1, PC 17:0\_14:1 excluded because of missingness > 75%

**Qualitative composition**

PC ae C32:1 consists of:  
PC 15:0\_16:1,    PC 17:0\_14:1,    PC O-14:0\_18:1,    PC O-16:0\_1  
PC O-18:0\_14:1,    PC O-20:1\_12:0,    PC 12:0\_19:1,    PC 13:0\_1  
PC 16:0\_15:1  
and further compounds

No independent Variable with  
coverage >0.25 out of PC 15:0\_16:1,  
PC 17:0\_14:1

PC ae C32:2 = R

Qualitative composition

PC ae C32:2 consists of:  
PC O-14:0\_18:2,    PC O-14:1\_18:1,    PC O-16:1\_16:1,    PC 13:  
PC 15:1\_16:1  
and further compounds

No independent Variable measured.

PC ae C34:0 = R

Qualitative composition

PC ae C34:0 consists of:  
PC O-16:0\_18:0,    PC O-17:0\_17:0,    PC O-20:0\_14:0,    PC 10:  
PC 11:0\_22:0,    PC 13:0\_20:0,    PC 15:0\_18:0,    PC 16:0\_17:0,  
PC 21:0\_12:0  
and further compounds

No independent Variable measured.

PC ae C34:1 = PC 15:0\_18:1 + PC 17:0\_16:1 + R

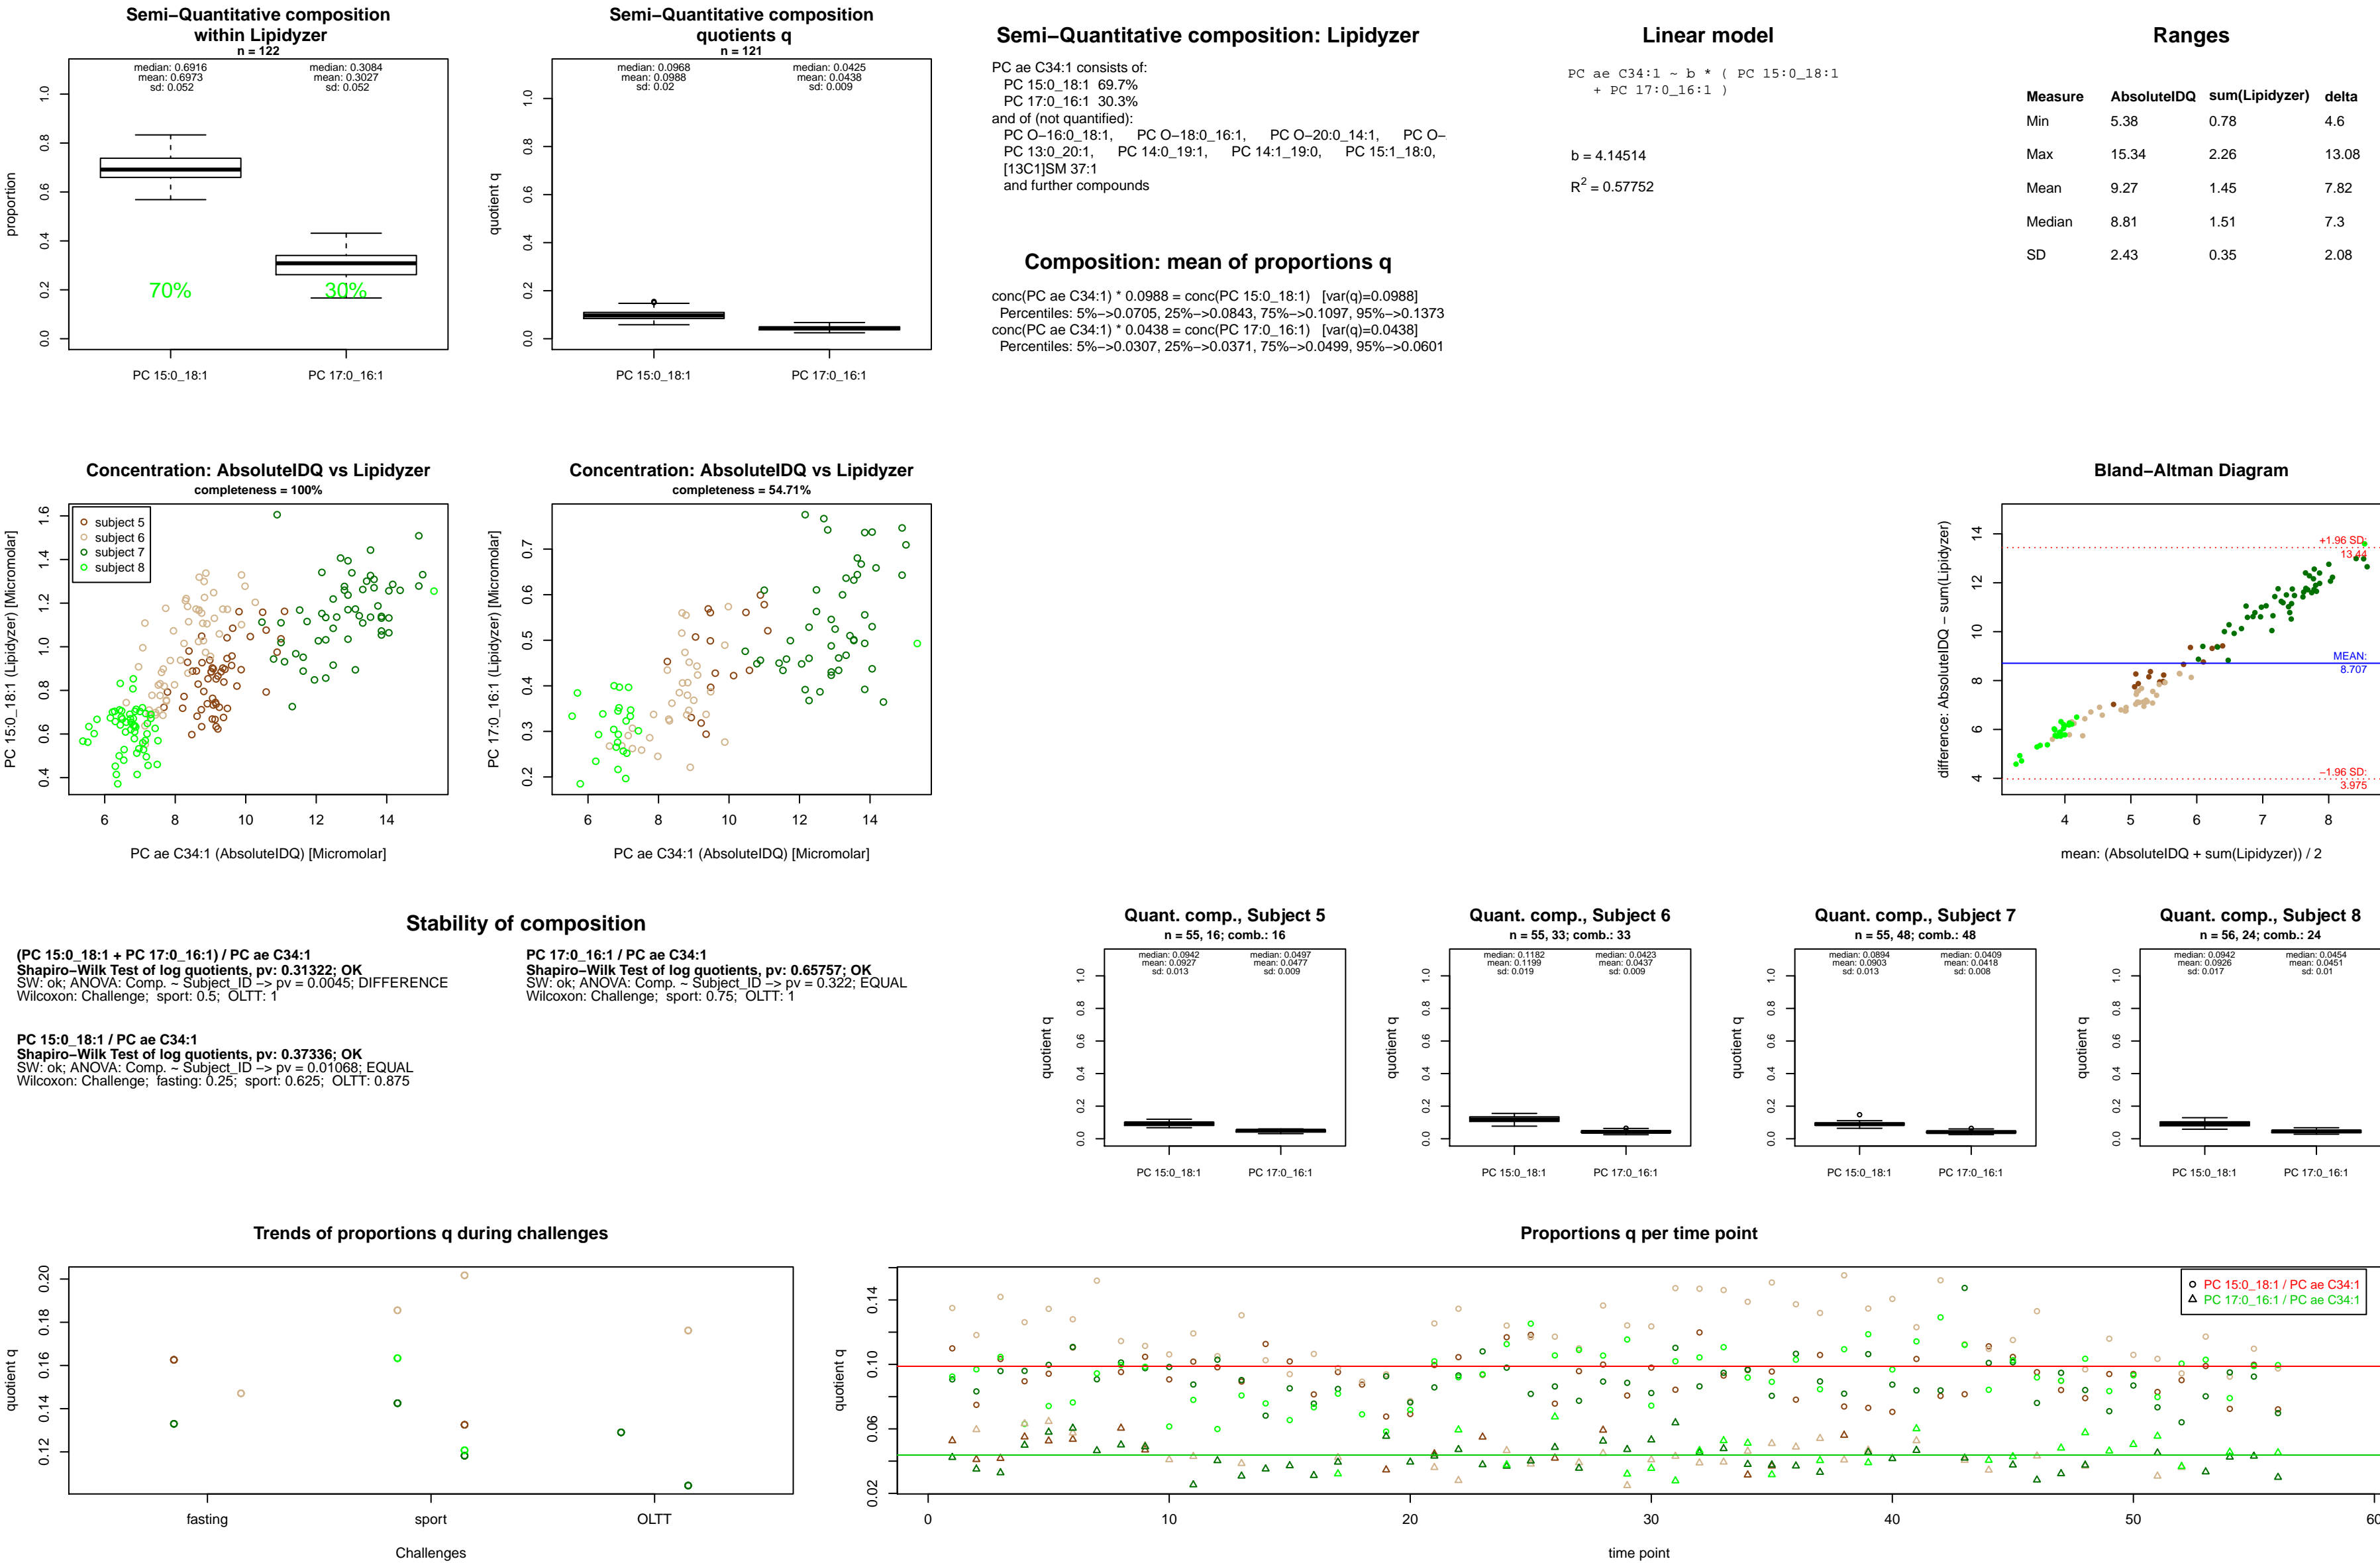



PC ae C34:2 = PC 15:0\_18:2 + R

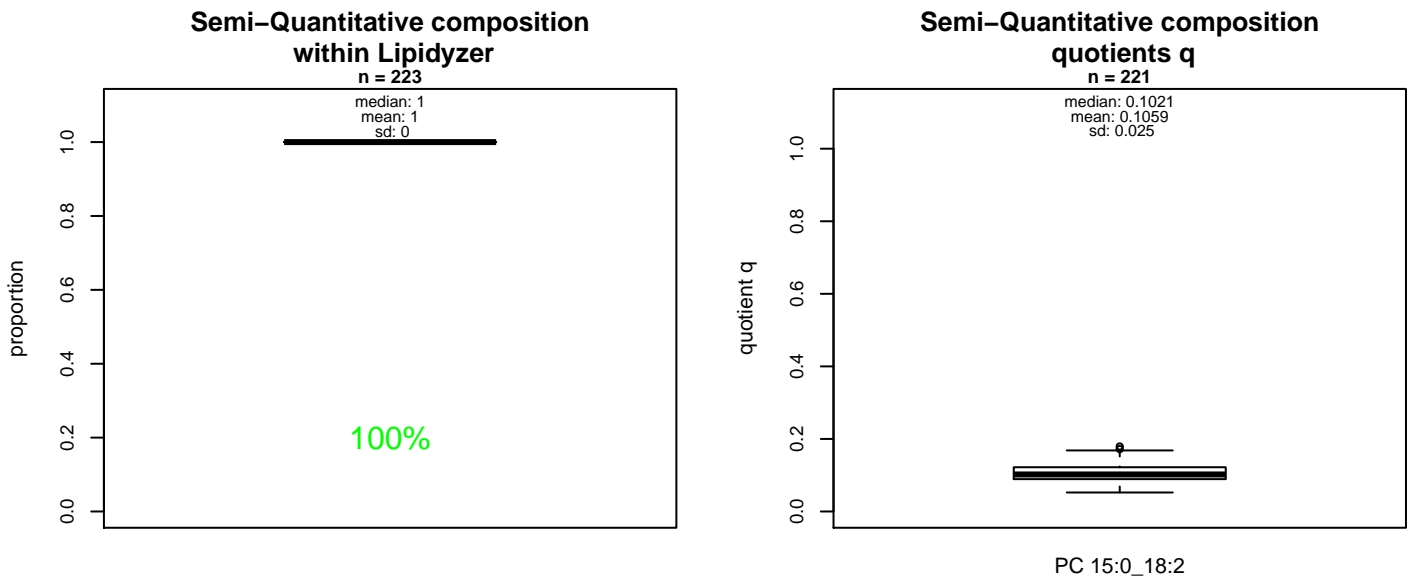

Semi-Quantitative composition: Lipidzyer

PC ae C34:2 consists of:  
PC 15:0\_18:2 100%  
and of (not quantified):  
PC O-16:0\_18:2, PC O-16:1\_18:1, PC O-20:1\_14:1, PC 13:  
PC 14:1\_19:1, PC 15:1\_18:1, PC 16:0\_17:2, PC 16:1\_17:1,  
and further compounds

Composition: mean of proportions q

conc(PC ae C34:2) \* 0.1059 = conc(PC 15:0\_18:2) [var(q)=0.1059]  
Percentiles: 5%→0.0698, 25%→0.0892, 75%→0.1219, 95%→0.1541

Linear model

$PC\ ae\ C34:2 \sim b * (PC\ 15:0_{18:2})$

$b = 3.24787$

$R^2 = 0.07136$

Ranges

| Measure | AbsoluteIDQ | sum(Lipidzyer) | delta |
|---------|-------------|----------------|-------|
| Min     | 6.73        | 0.63           | 6.1   |
| Max     | 16.96       | 1.65           | 15.31 |
| Mean    | 10.48       | 1.07           | 9.41  |
| Median  | 10.19       | 1.07           | 9.12  |
| SD      | 2.28        | 0.19           | 2.1   |

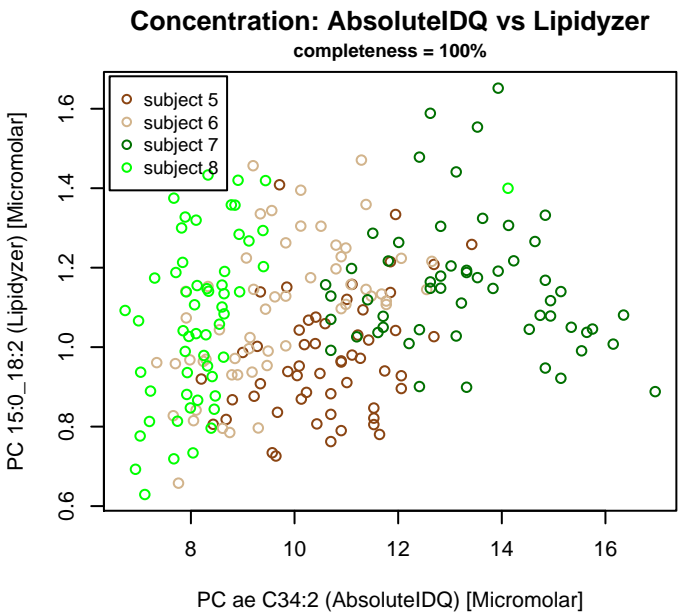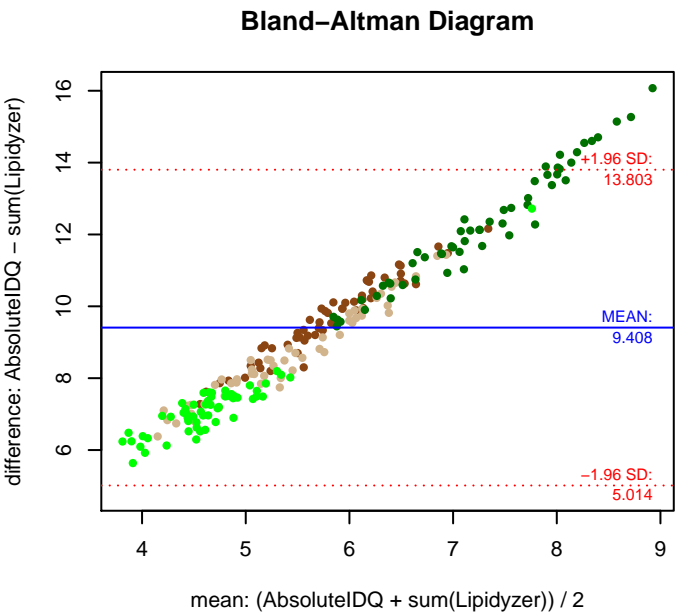

Stability of composition

PC 15:0\_18:2 / PC ae C34:2  
Shapiro-Wilk Test of log quotients, pv: 0.62993; OK  
SW: ok; ANOVA: Comp. ~ Subject\_ID -> pv = 0; DIFFERENCE  
Wilcoxon: Challenge; fasting: 0.625; sport: 0.375; OLT: 1

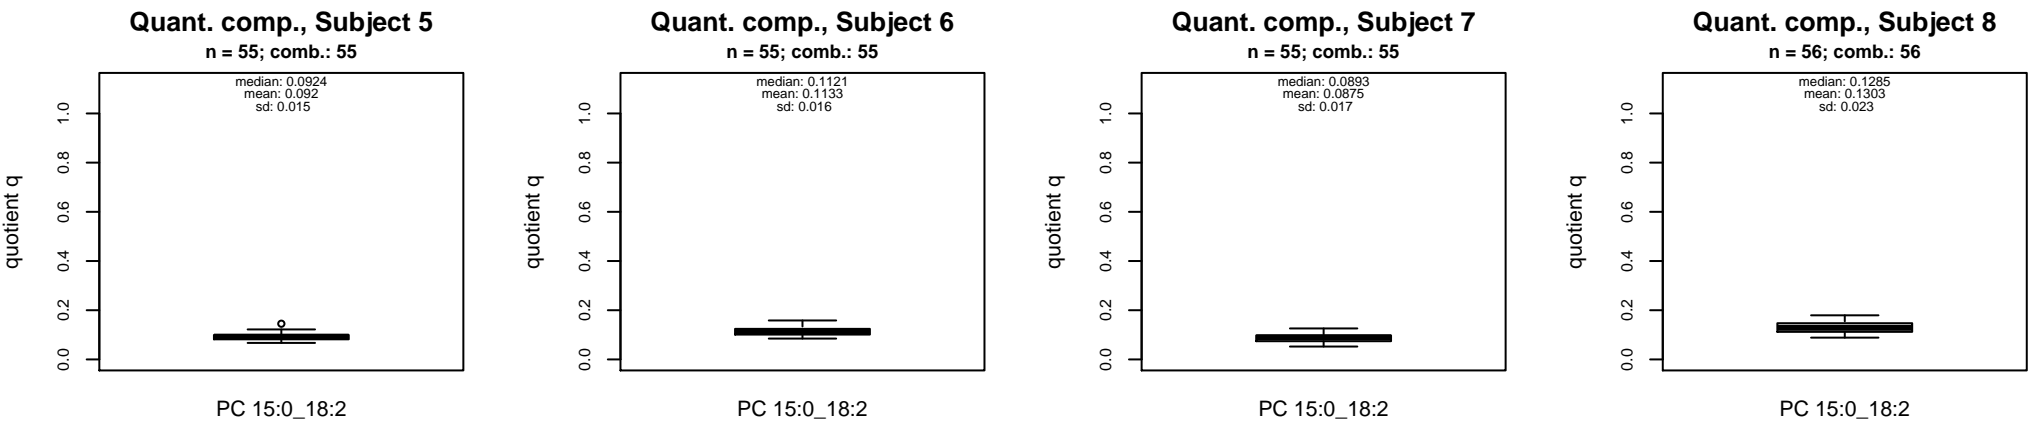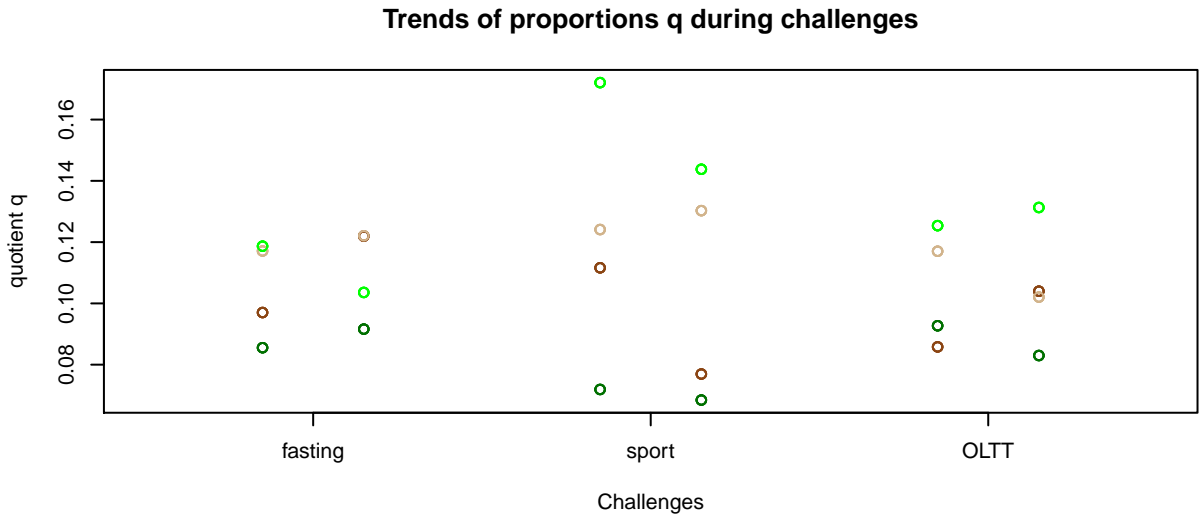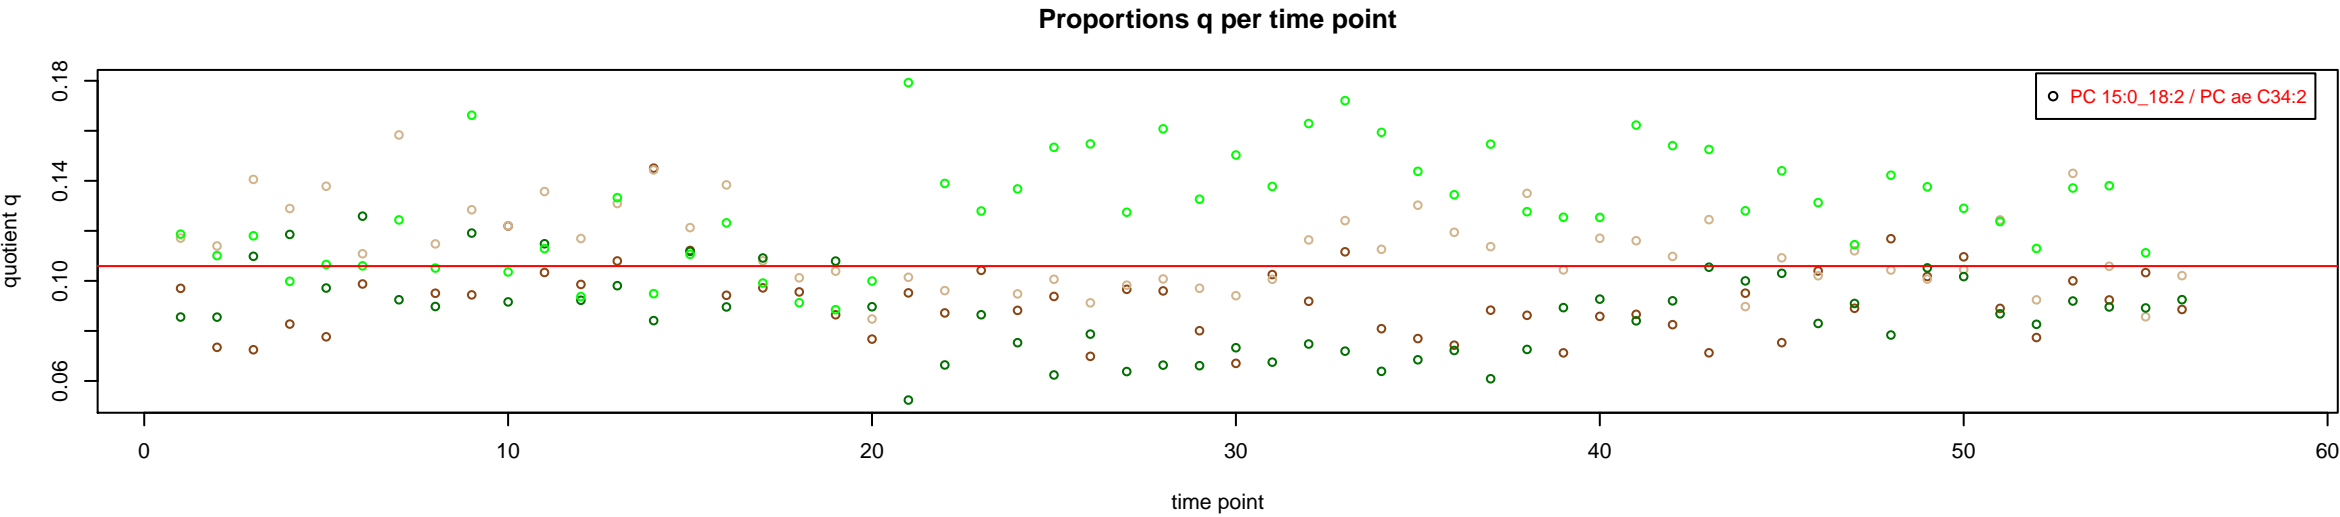

**PC ae C34:3 = PC 15:0\_18:3 + R**

PC 15:0\_18:3 excluded because of missingness > 75%

**Qualitative composition**

PC ae C34:3 consists of:  
PC 15:0\_18:3,    PC O–16:0\_18:3,    PC O–16:1\_18:2,    PC 13:0\_2  
PC 16:1\_17:2  
and further compounds

No independent Variable with  
coverage >0.25 out of PC 15:0\_18:3

PC ae C36:1 = PC 17:0\_18:1 + R

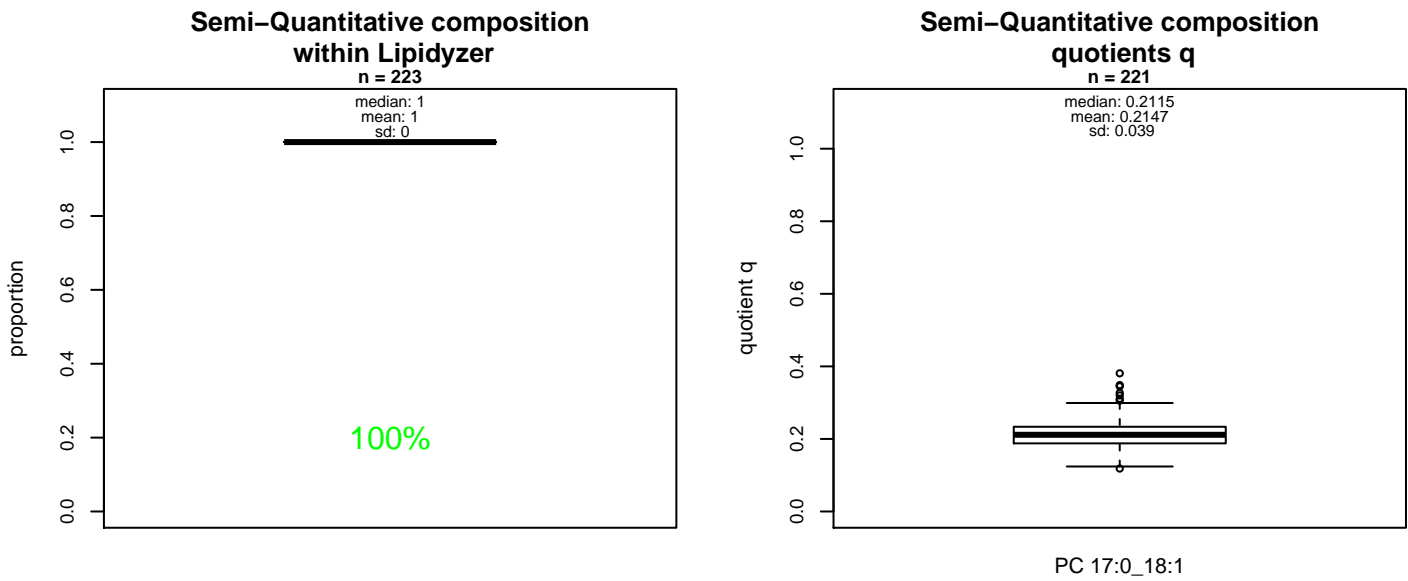

Semi-Quantitative composition: Lipidzyzer

PC ae C36:1 consists of:  
PC 17:0\_18:1 100%  
and of (not quantified):  
PC O-16:0\_20:1, PC O-18:0\_18:1, PC O-20:0\_16:1, PC O-  
PC 13:0\_22:1, PC 14:1\_21:0, PC 15:0\_20:1, PC 15:1\_20:0,  
PC 16:0\_19:1, PC 16:1\_19:0, PC 17:1\_18:0, PC 18:4\_18:4,  
[13C1]SM 39:1  
and further compounds

Composition: mean of proportions q

conc(PC ae C36:1) \* 0.2147 = conc(PC 17:0\_18:1) [var(q)=0.2147]  
Percentiles: 5%→0.1601, 25%→0.1877, 75%→0.2335, 95%→0.2878

Linear model

$$PC\ ae\ C36:1 \sim b * (PC\ 17:0_{18:1})$$

$$b = 4.23026$$

$$R^2 = 0.64372$$

Ranges

| Measure | AbsoluteIDQ | sum(Lipidzyzer) | delta |
|---------|-------------|-----------------|-------|
| Min     | 3.28        | 0.65            | 2.63  |
| Max     | 14.62       | 2.52            | 12.1  |
| Mean    | 7.04        | 1.48            | 5.56  |
| Median  | 6.97        | 1.5             | 5.47  |
| SD      | 2.25        | 0.42            | 1.82  |

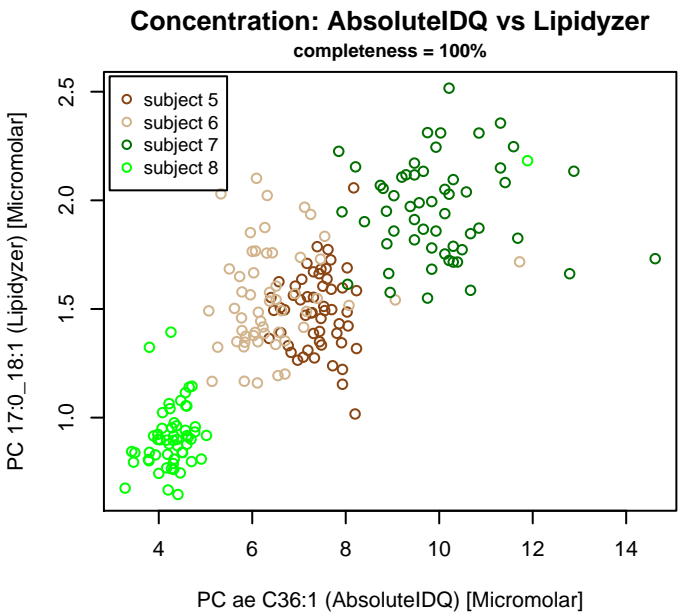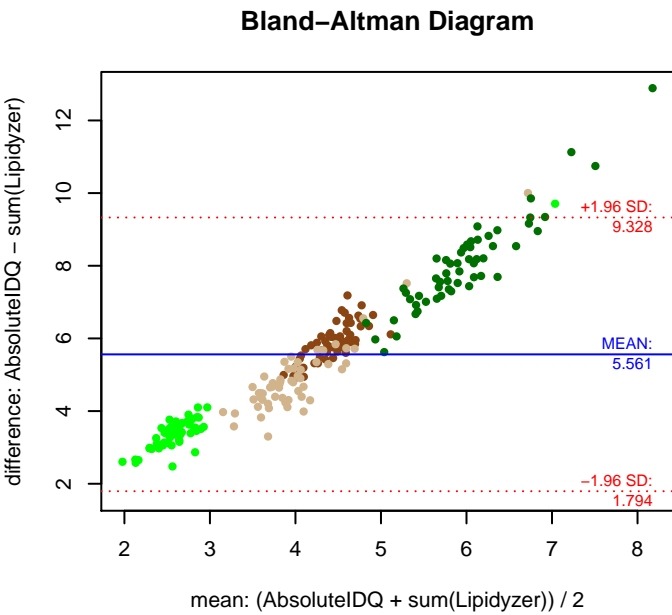

Stability of composition

PC 17:0\_18:1 / PC ae C36:1  
Shapiro-Wilk Test of log quotients, pv: 0.04571; OK  
SW: ok; ANOVA: Comp. ~ Subject\_ID -> pv = 0.5455; EQUAL  
Wilcoxon: Challenge; fasting: 0.25; sport: 0.375; OLTT: 0.875

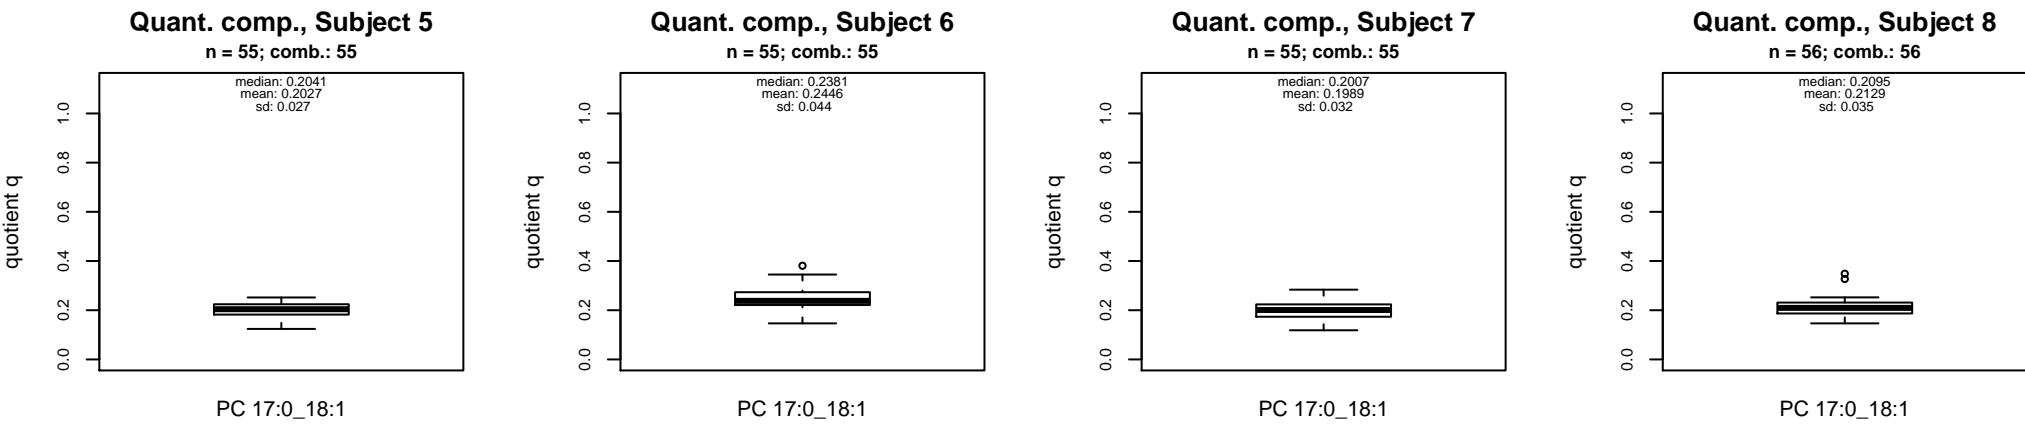

Trends of proportions q during challenges

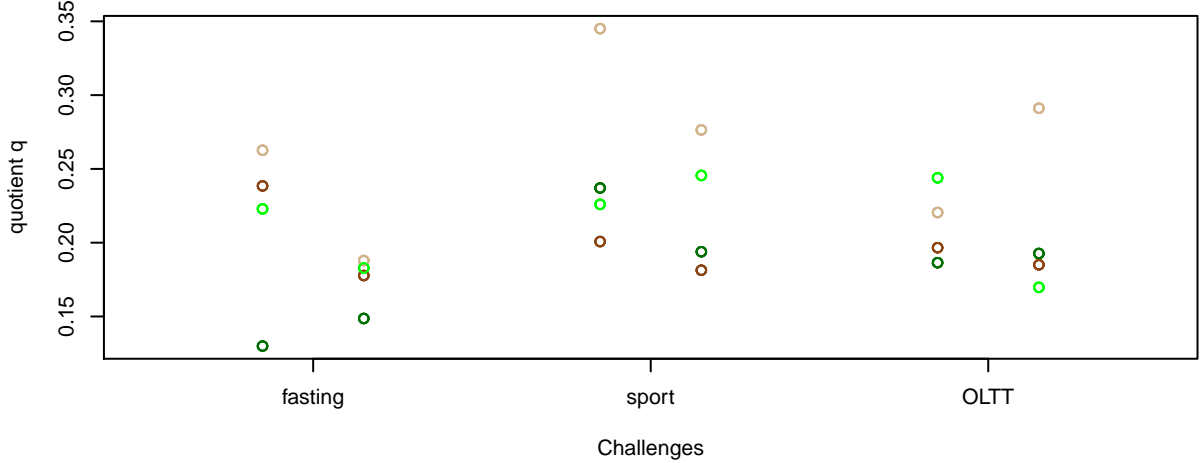

Proportions q per time point

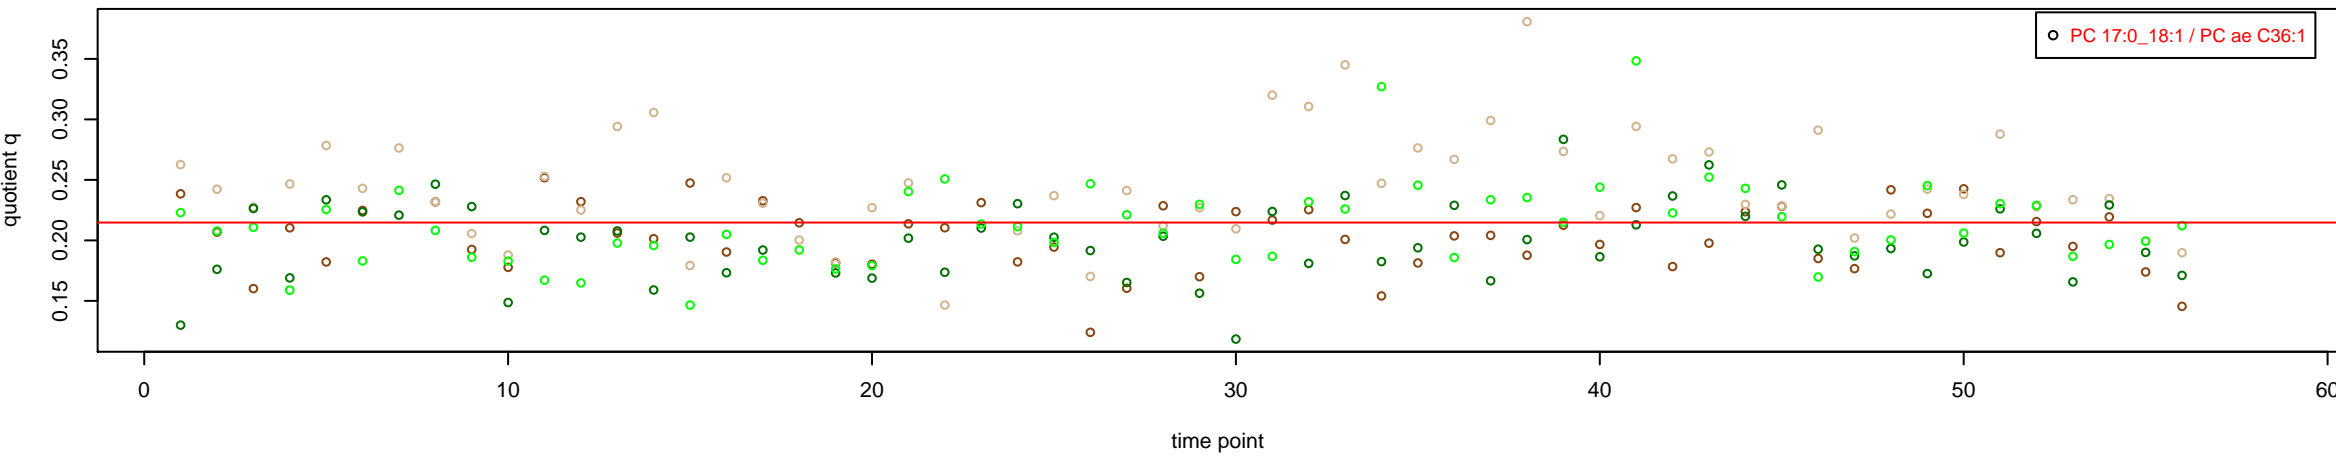

PC ae C36:2 = PC 17:0\_18:2 + R

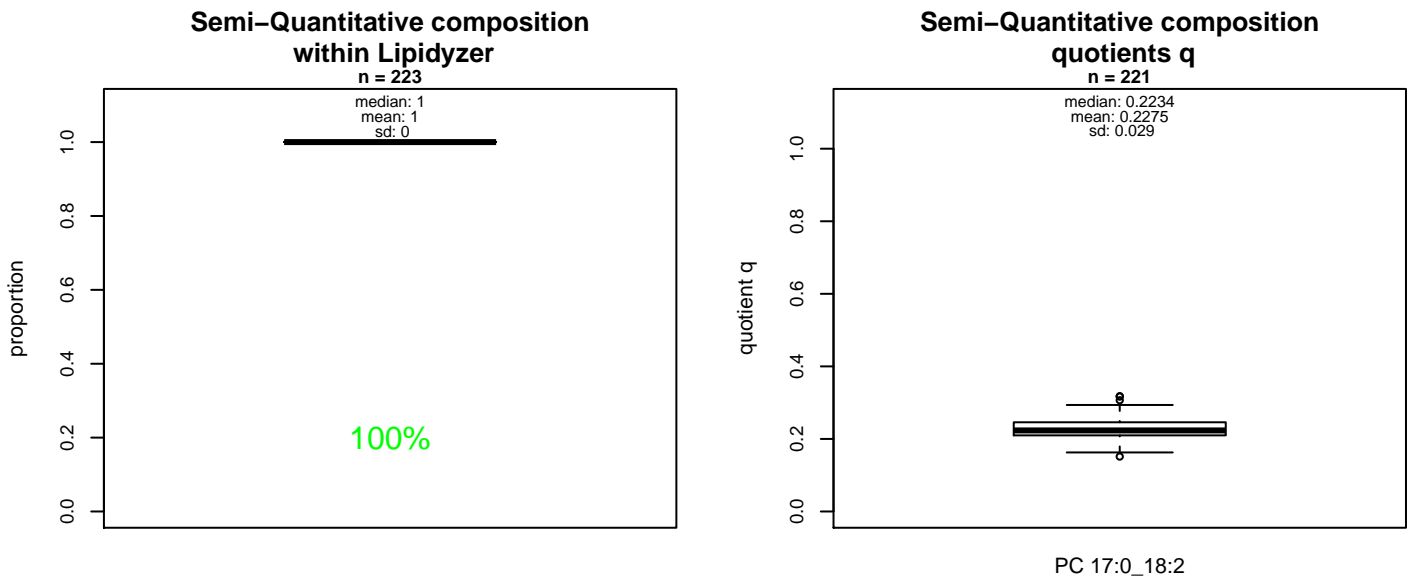

Semi-Quantitative composition: Lipidzyzer

PC ae C36:2 consists of:  
PC 17:0\_18:2 100%  
and of (not quantified):  
PC O-16:0\_20:2, PC O-18:0\_18:2, PC O-18:1\_18:1, PC O-13:0\_22:2, PC 15:0\_20:2, PC 15:1\_20:1, PC 16:1\_19:1, [13C1]SM 39:2  
and further compounds

Composition: mean of proportions q

conc(PC ae C36:2) \* 0.2275 = conc(PC 17:0\_18:2) [var(q)=0.2275]  
Percentiles: 5%→0.1837, 25%→0.2098, 75%→0.2459, 95%→0.2799

Linear model

PC ae C36:2 ~ b \* ( PC 17:0\_18:2 )

b = 3.27954

R<sup>2</sup> = 0.52816

Ranges

| Measure | AbsoluteIDQ | sum(Lipidzyzer) | delta |
|---------|-------------|-----------------|-------|
| Min     | 9.2         | 1.76            | 7.44  |
| Max     | 19.24       | 4.41            | 14.83 |
| Mean    | 13.38       | 3.02            | 10.36 |
| Median  | 13.03       | 2.96            | 10.07 |
| SD      | 2.27        | 0.51            | 1.76  |

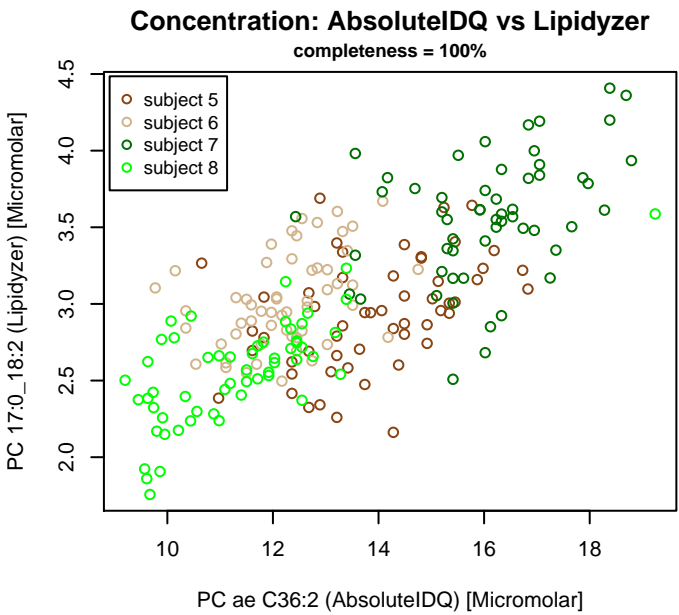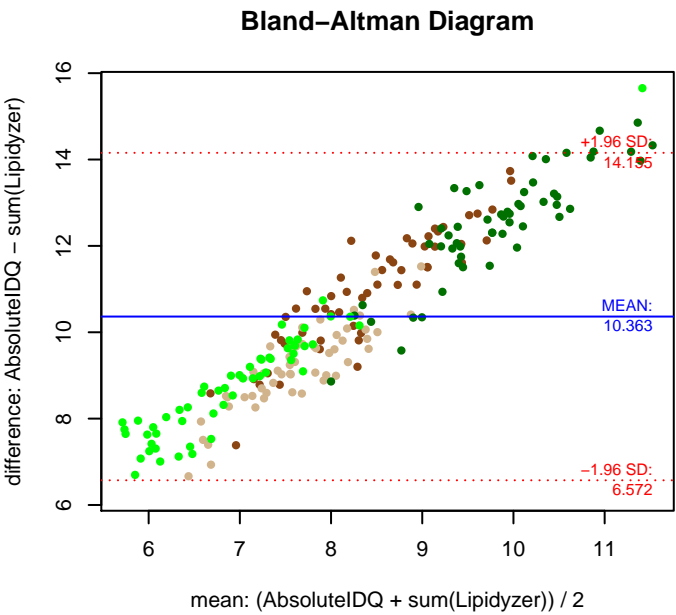

Stability of composition

PC 17:0\_18:2 / PC ae C36:2  
Shapiro-Wilk Test of log quotients, pv: 0.867; OK  
SW: ok; ANOVA: Comp. ~ Subject\_ID -> pv = 0.19747; EQUAL  
Wilcoxon: Challenge; fasting: 0.625; sport: 0.375; OLTT: 0.125

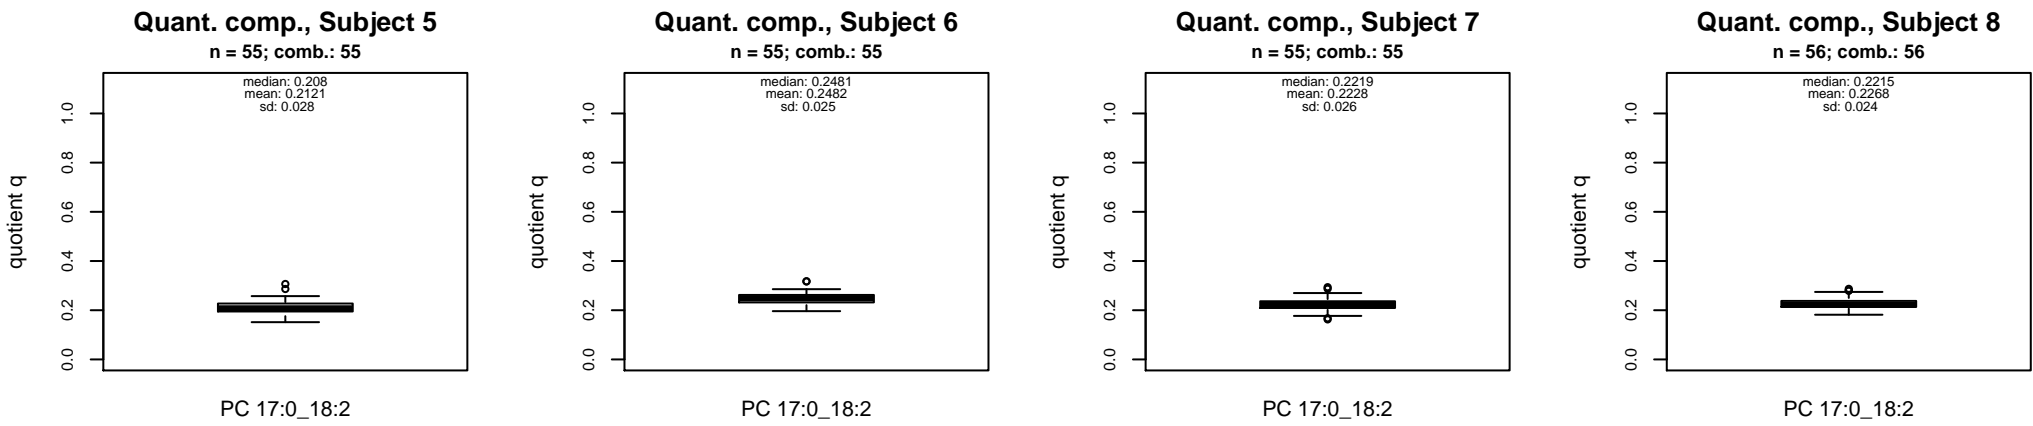

Trends of proportions q during challenges

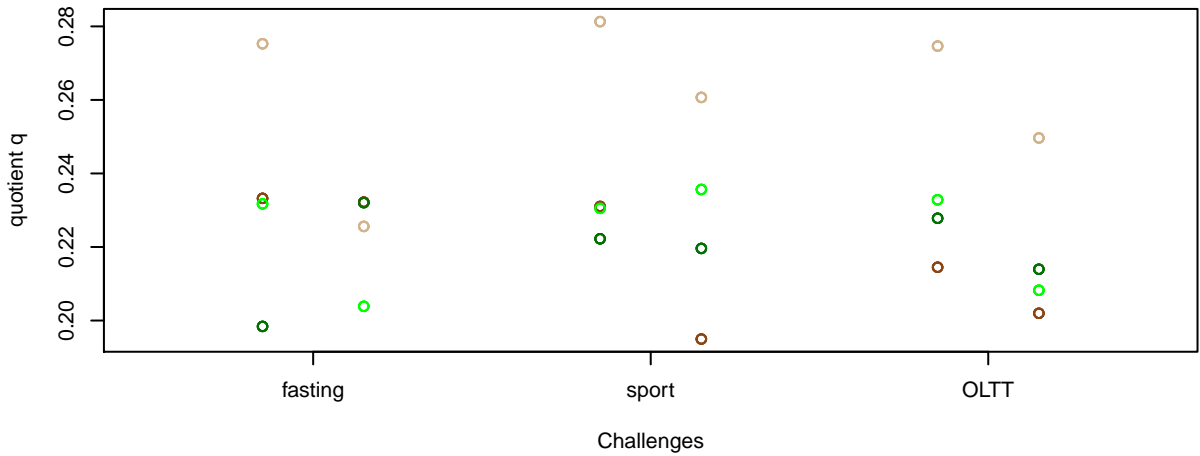

Proportions q per time point

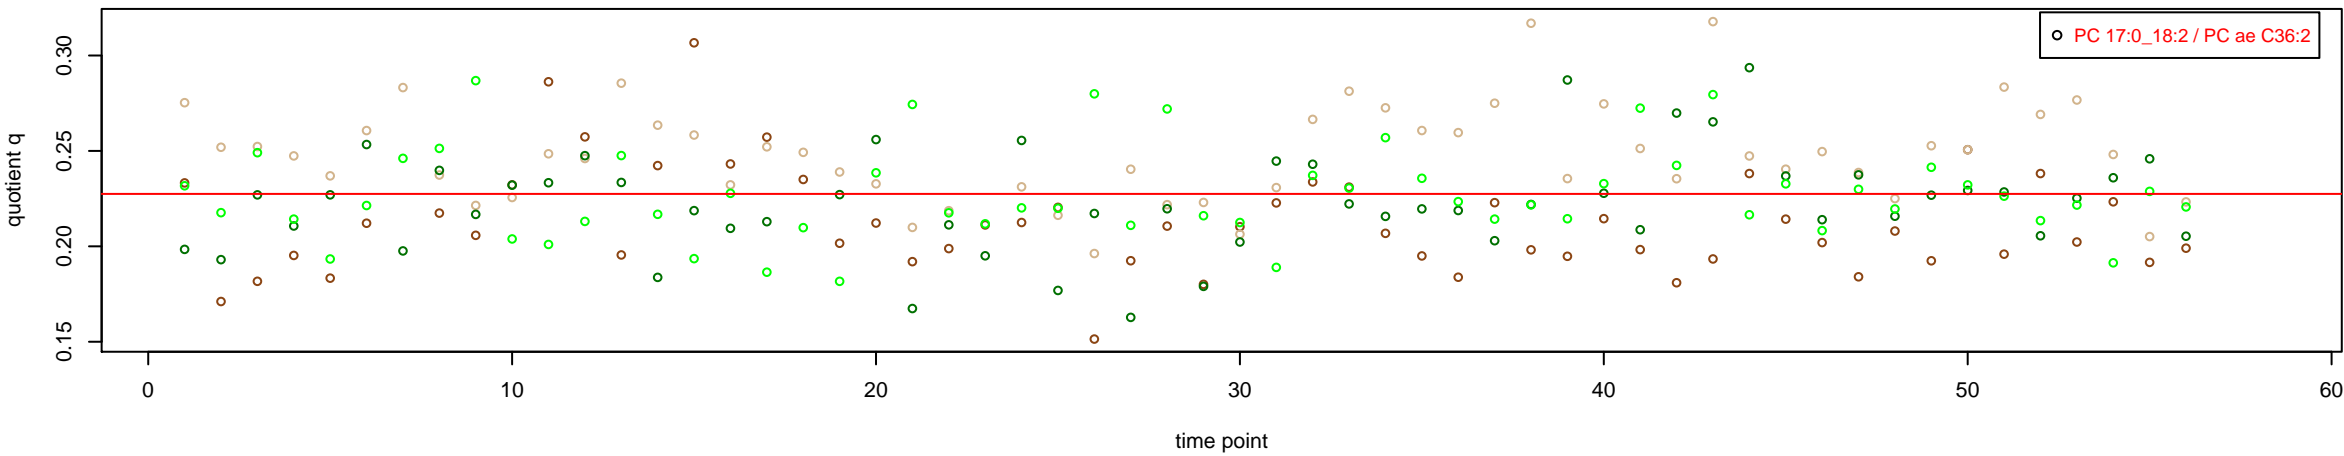

PC ae C36:3 = PC 15:0\_20:3 + PC 17:0\_18:3 + R

PC 17:0\_18:3 excluded because of missingness > 75%

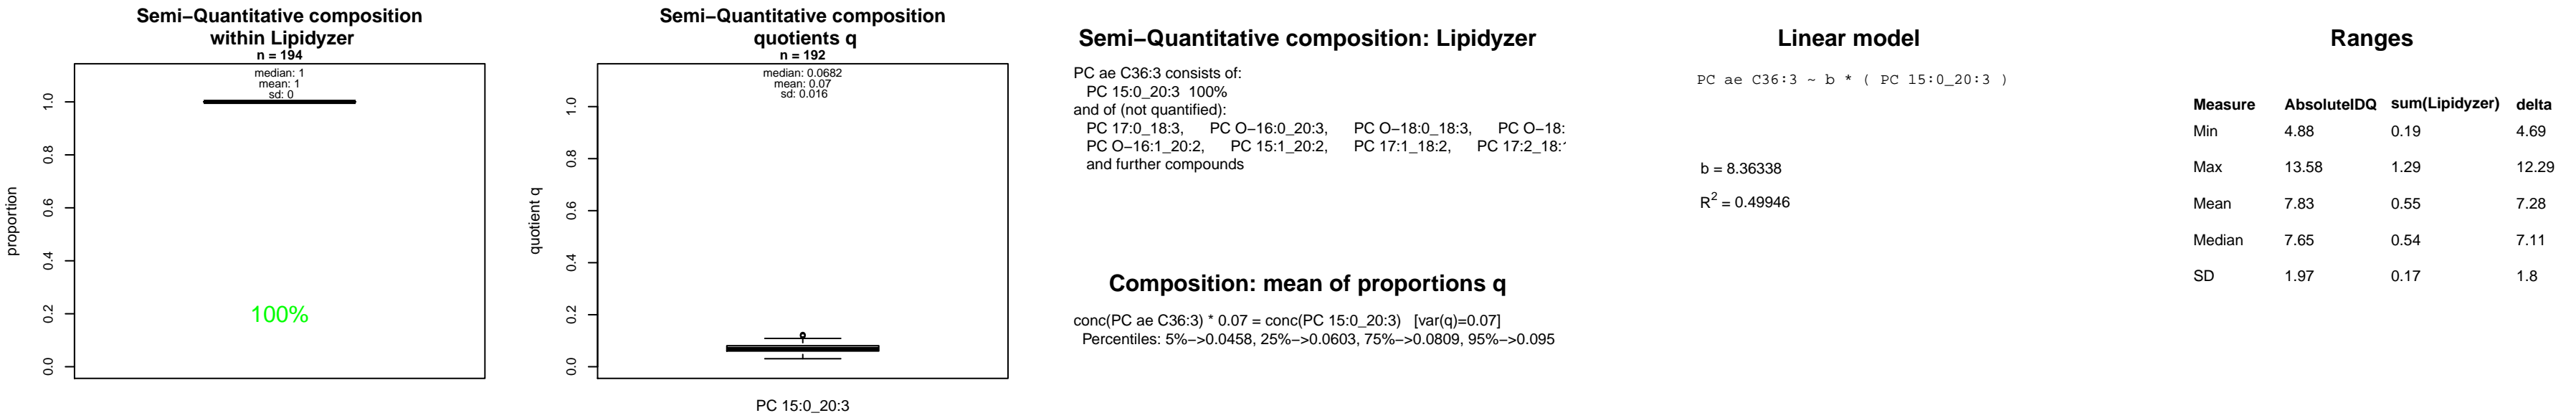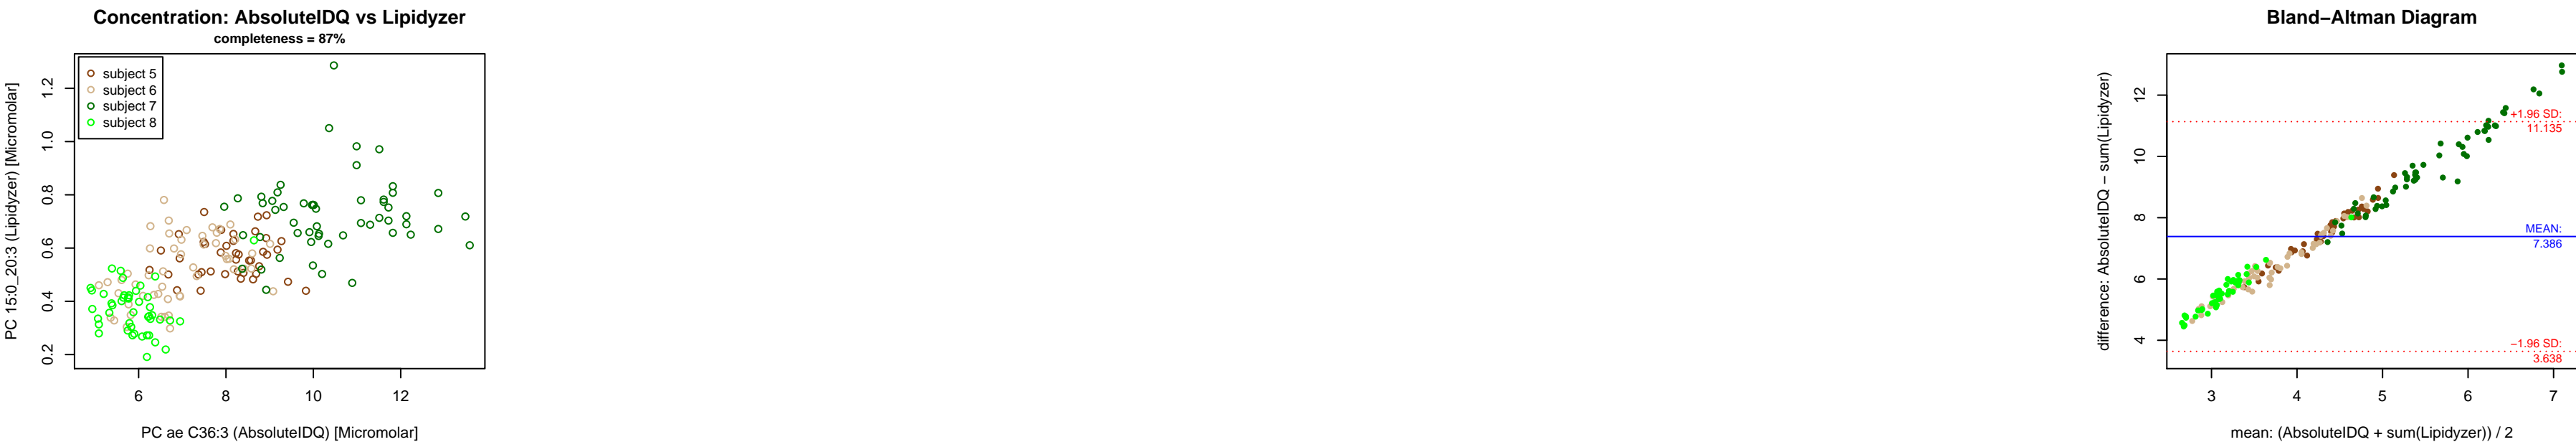

Stability of composition

PC 15:0\_20:3 / PC ae C36:3  
Shapiro-Wilk Test of log quotients, pv: 0.11199; OK  
SW: ok; ANOVA: Comp. ~ Subject\_ID -> pv = 0.00182; DIFFERENCE  
Wilcoxon: Challenge; fasting: 0.25; sport: 0.75; OLTT: 0.625

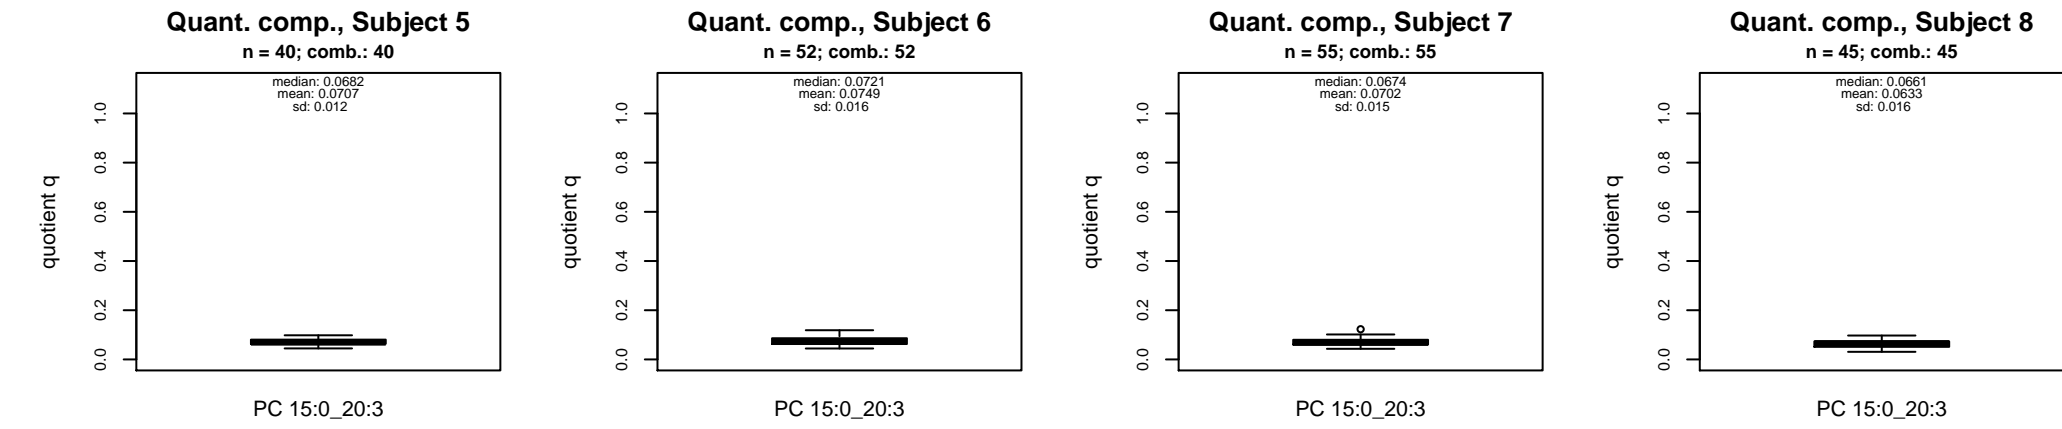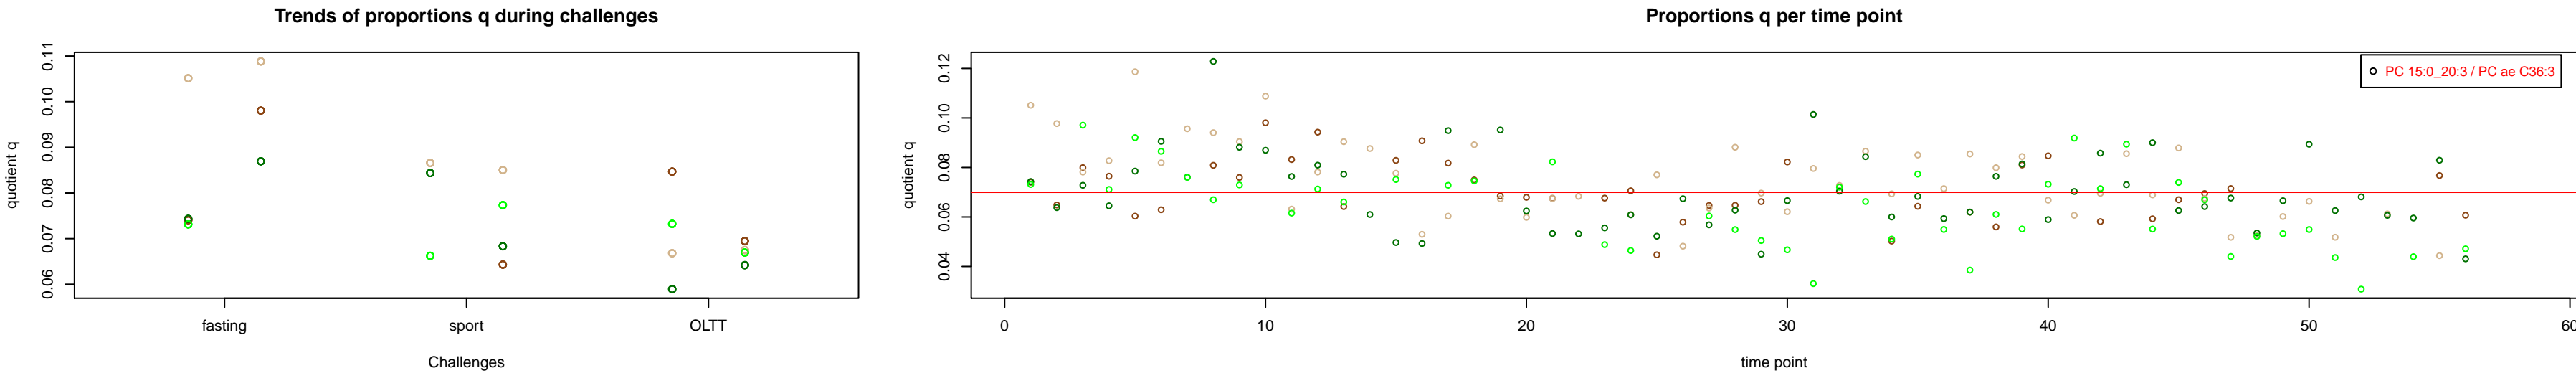

PC ae C36:4 = PC 15:0\_20:4 + R

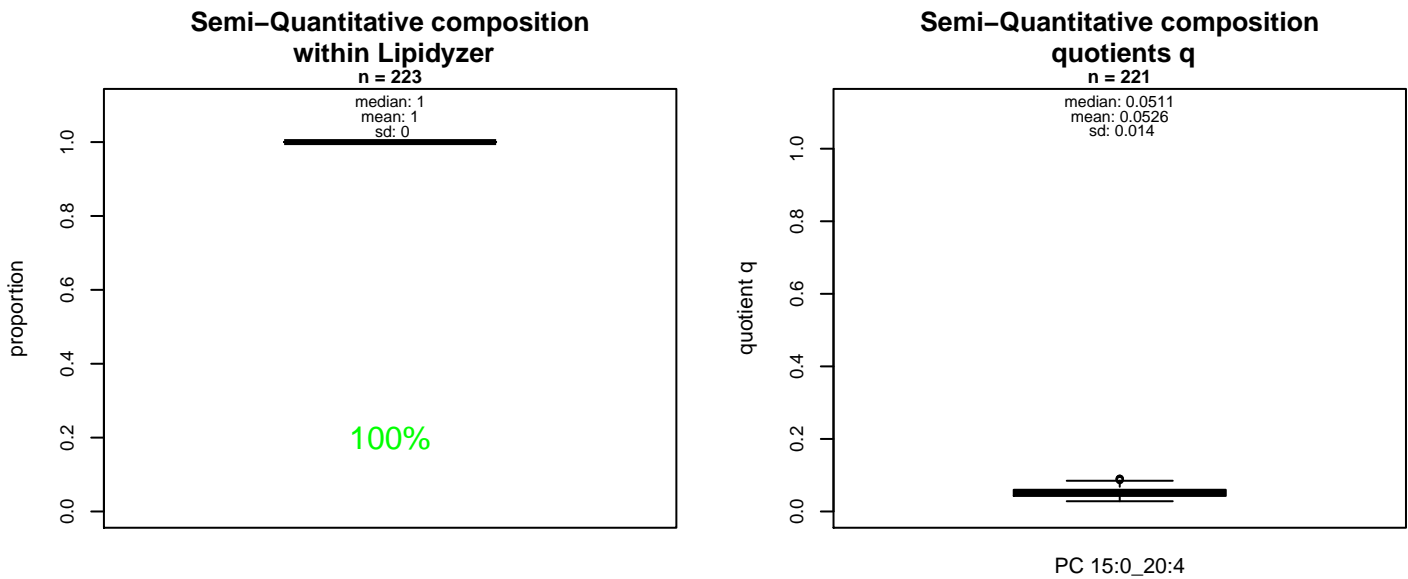

Semi-Quantitative composition: Lipidzyer

PC ae C36:4 consists of:  
PC 15:0\_20:4 100%  
and of (not quantified):  
PC O-16:0\_20:4, PC O-16:1\_20:3, PC O-18:0\_18:4, PC O-18:2\_18:2, PC 13:0\_22:4, PC 15:1\_20:3, PC 17:0\_18:4, PC 17:2\_18:2  
and further compounds

Composition: mean of proportions q

conc(PC ae C36:4) \* 0.0526 = conc(PC 15:0\_20:4) [var(q)=0.0526]  
Percentiles: 5%→0.0339, 25%→0.0429, 75%→0.0599, 95%→0.0793

Linear model

$$PC\ ae\ C36:4 \sim b * (PC\ 15:0_{20:4})$$
  
  
$$b = 11.15708$$
  
$$R^2 = 0.25993$$

Ranges

| Measure | AbsoluteIDQ | sum(Lipidzyer) | delta |
|---------|-------------|----------------|-------|
| Min     | 8.59        | 0.45           | 8.14  |
| Max     | 26.01       | 1.8            | 24.21 |
| Mean    | 17.54       | 0.88           | 16.66 |
| Median  | 18.55       | 0.86           | 17.69 |
| SD      | 4.63        | 0.21           | 4.42  |

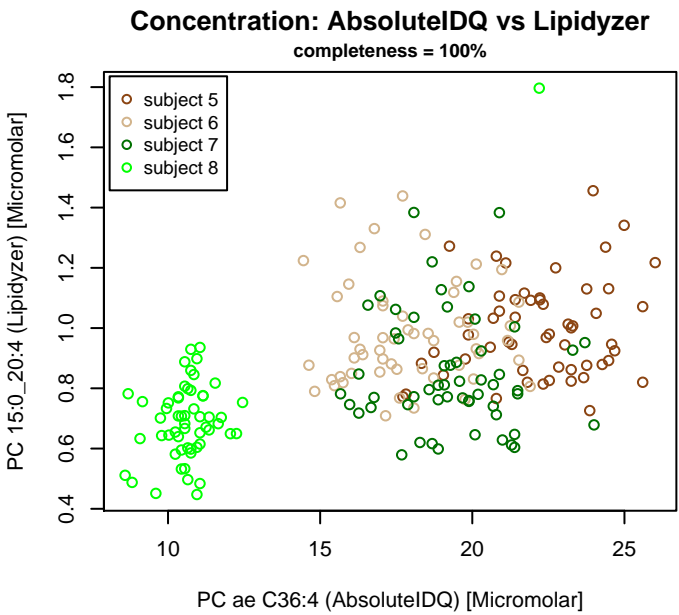

Bland-Altman Diagram

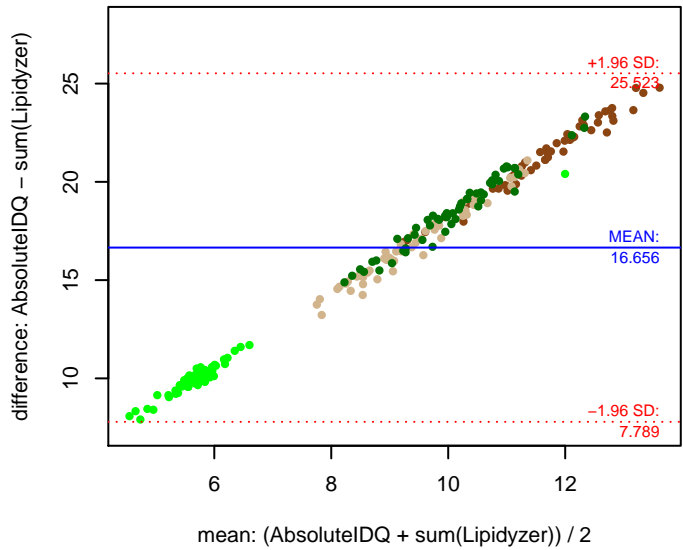

Stability of composition

PC 15:0\_20:4 / PC ae C36:4  
Shapiro-Wilk Test of log quotients, pv: 0.32439; OK  
SW: ok; ANOVA: Comp. ~ Subject\_ID -> pv = 0; DIFFERENCE  
Wilcoxon: Challenge; fasting: 1; sport: 0.875; OLTT: 0.25

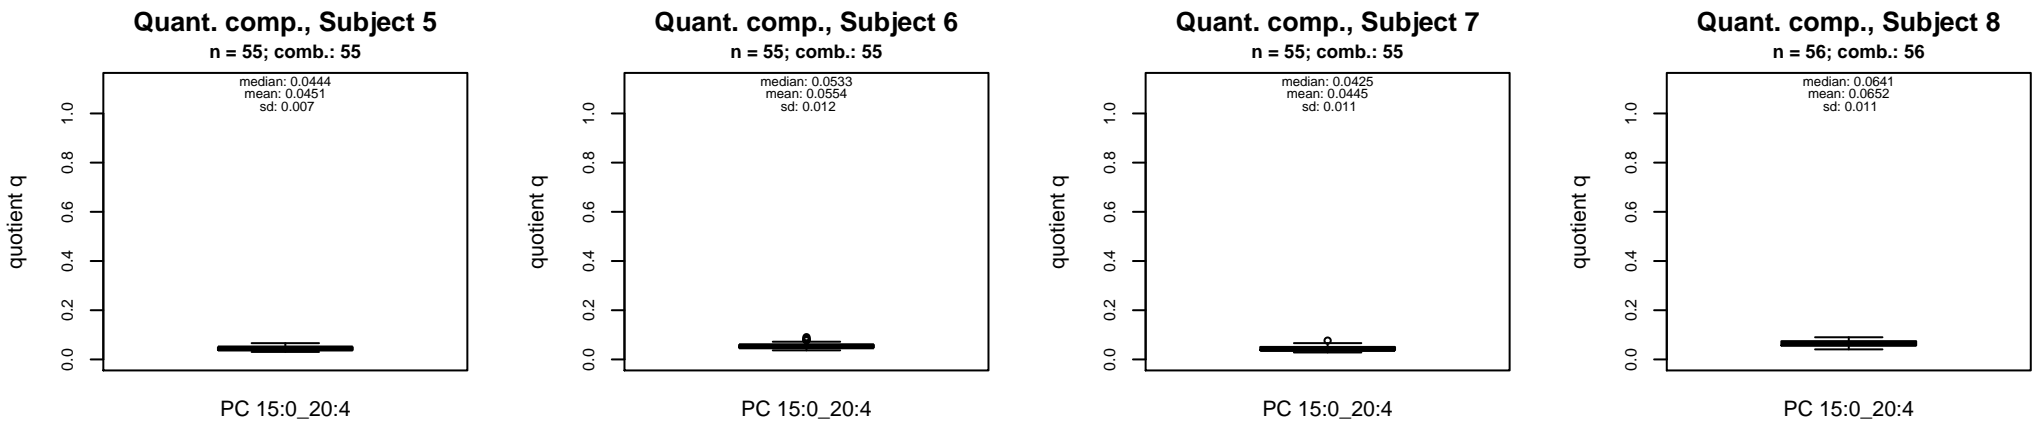

Trends of proportions q during challenges

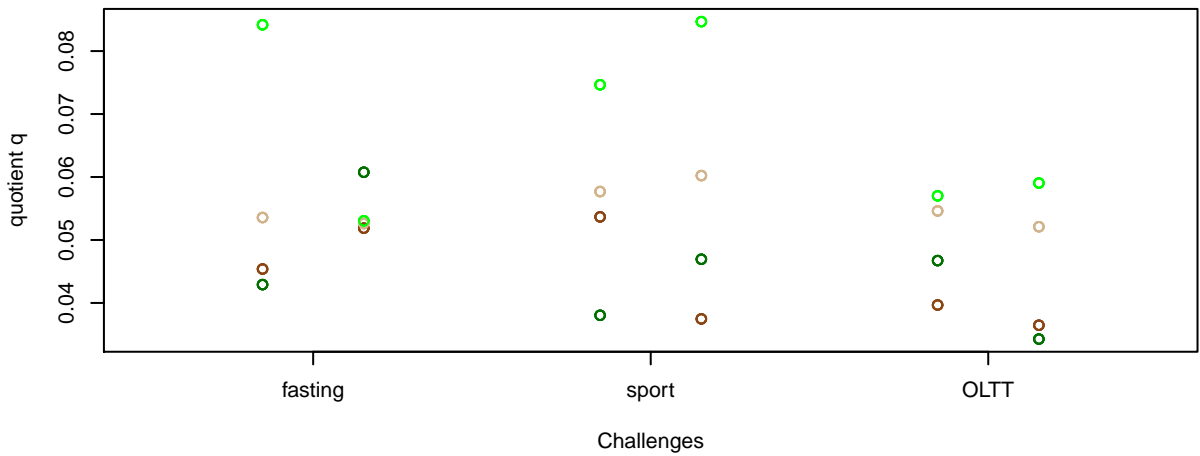

Proportions q per time point

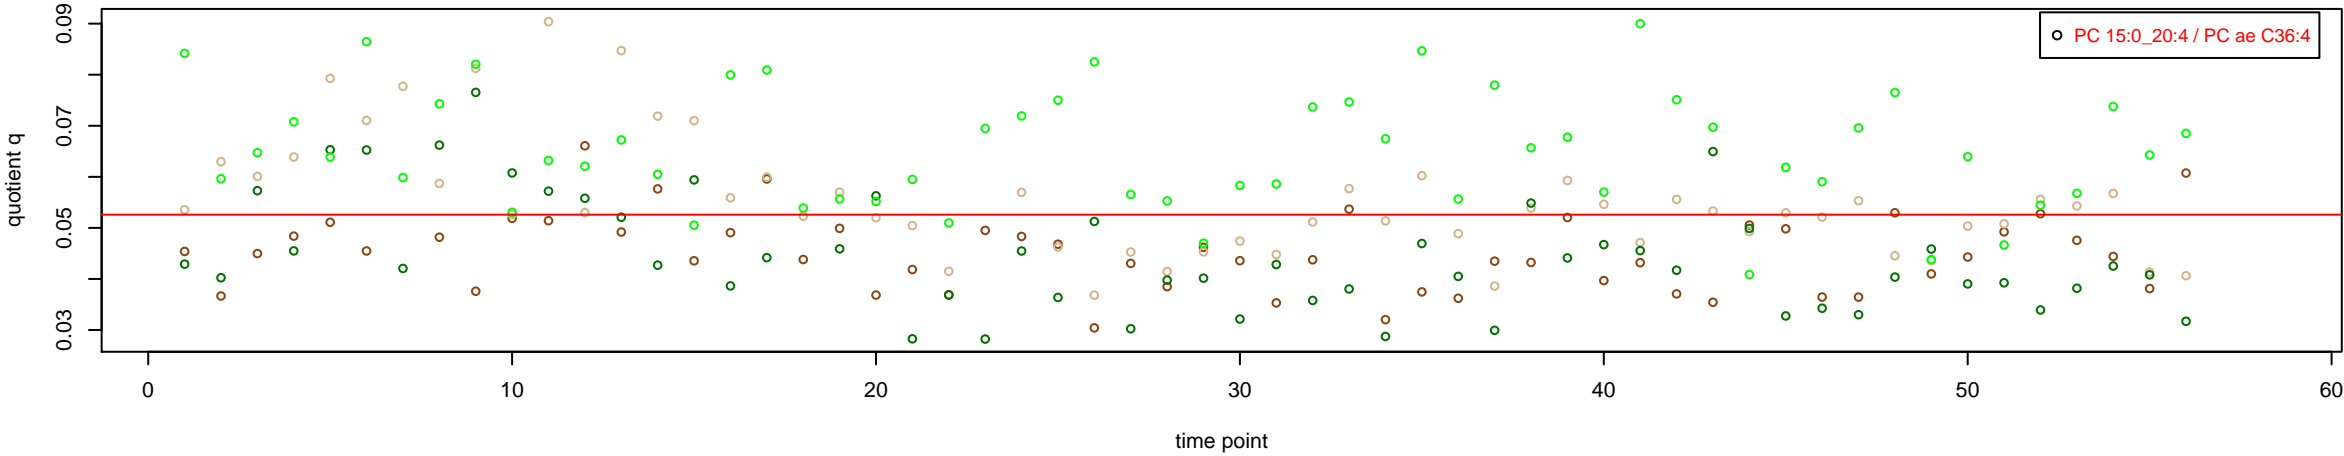

$PC_{ae\ C36:5} = PC_{15:0\_20:5} + R$

PC 15:0\_20:5 excluded because of missingness > 75%

Qualitative composition

PC ae C36:5 consists of:  
PC 15:0\_20:5,    PC O-16:0\_20:5,    PC O-16:1\_20:4,    PC O-18:0\_20:4,  
PC O-18:2\_18:3,    PC 15:1\_20:4,    PC 17:1\_18:4,    PC 17:2\_18:3,  
and further compounds

No independent Variable with  
coverage >0.25 out of PC 15:0\_20:5



**PC ae C38:0 = PC 18:2\_20:5 + R**

PC 18:2\_20:5 excluded because of missingness > 75%

**Qualitative composition**

PC ae C38:0 consists of:  
PC 18:2\_20:5,    PC O-16:0\_22:0,    PC O-18:0\_20:0,    PC 15:0\_2  
PC 16:0\_21:0,    PC 17:0\_20:0,    PC 18:0\_19:0,    PC 16:1\_22:6,  
PC 18:4\_20:3  
and further compounds

No independent Variable with  
coverage >0.25 out of PC 18:2\_20:5

PC ae C38:2 = R

Qualitative composition

PC ae C38:2 consists of:  
PC O-16:0\_22:2, PC O-18:0\_20:2, PC O-18:1\_20:1, PC O-  
PC O-16:1\_22:1, PC 15:0\_22:2, PC 15:1\_22:1, PC 17:0\_20:2,  
PC 17:1\_20:1, PC 17:2\_20:0, PC 18:1\_19:1, PC 18:2\_19:0,  
PC 18:4\_20:5  
and further compounds

No independent Variable measured.

PC ae C38:3 = PC 17:0\_20:3 + R

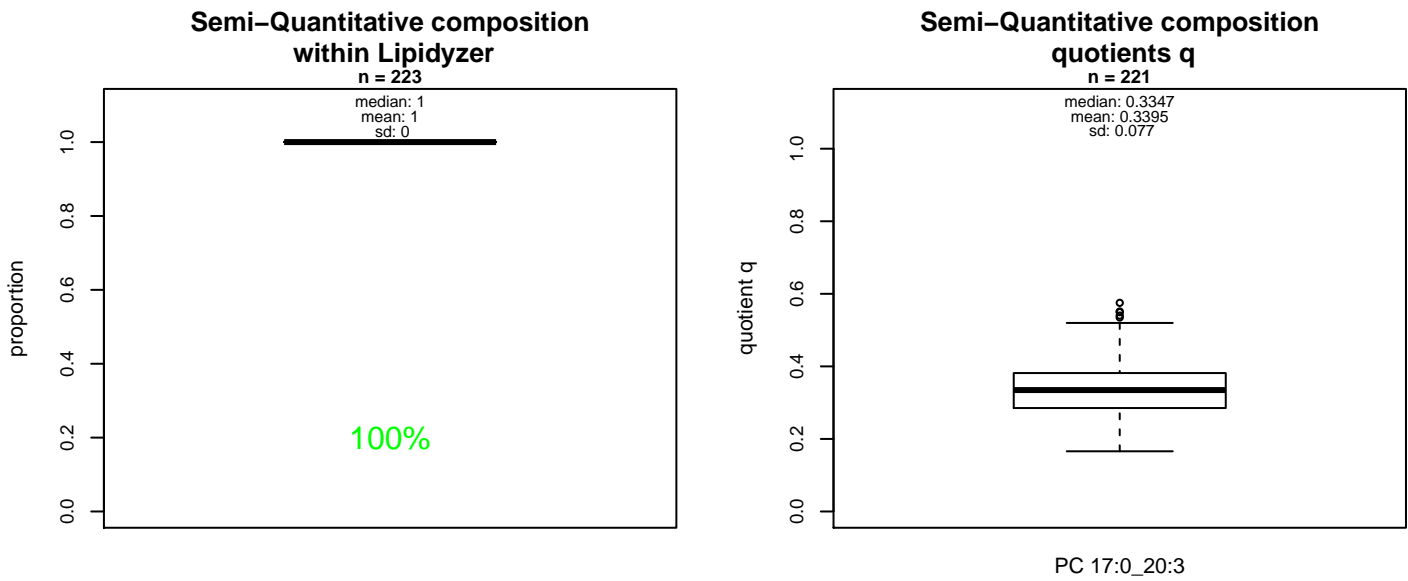

Semi-Quantitative composition: Lipidzyer

PC ae C38:3 consists of:  
PC 17:0\_20:3 100%  
and of (not quantified):  
PC O-18:0\_20:3, PC O-16:1\_22:2, PC O-18:1\_20:2, PC O-  
PC O-18:3\_20:0, PC 15:1\_22:2, PC 17:1\_20:2, PC 17:2\_20:3  
PC 18:3\_19:0  
and further compounds

Composition: mean of proportions q

conc(PC ae C38:3) \* 0.3395 = conc(PC 17:0\_20:3) [var(q)=0.3395]  
Percentiles: 5%→0.2248, 25%→0.2852, 75%→0.3816, 95%→0.4767

Linear model

PC ae C38:3 ~ b \* ( PC 17:0\_20:3 )

b = 1.66896

R<sup>2</sup> = 0.64485

Ranges

| Measure | AbsoluteIDQ | sum(Lipidzyer) | delta |
|---------|-------------|----------------|-------|
| Min     | 2           | 0.43           | 1.57  |
| Max     | 6.15        | 2.75           | 3.4   |
| Mean    | 3.68        | 1.27           | 2.41  |
| Median  | 3.73        | 1.27           | 2.46  |
| SD      | 0.97        | 0.47           | 0.5   |

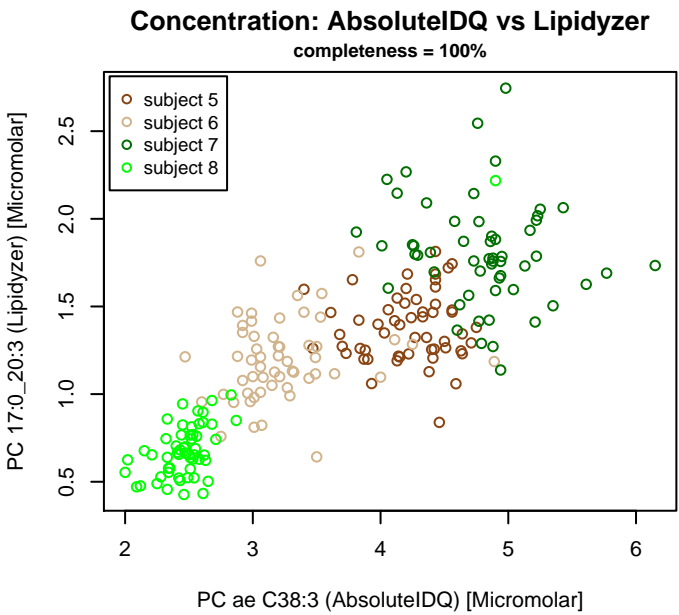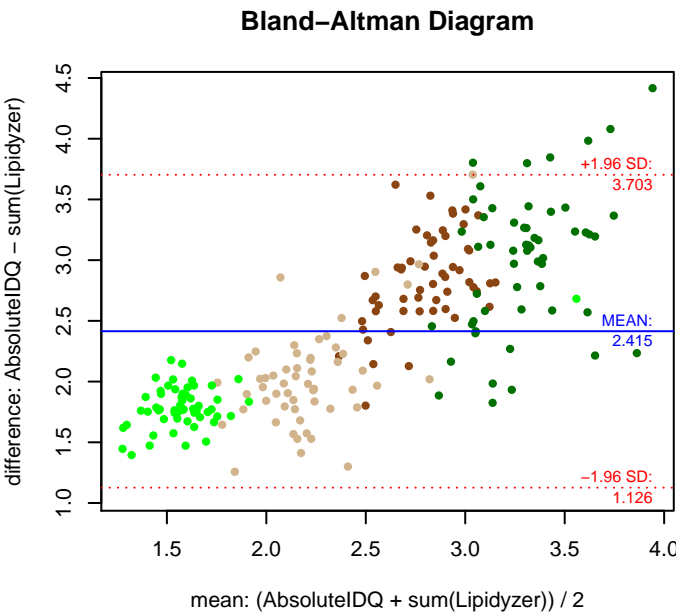

Stability of composition

PC 17:0\_20:3 / PC ae C38:3  
Shapiro-Wilk Test of log quotients, pv: 0.30664; OK  
SW: ok; ANOVA: Comp. ~ Subject\_ID -> pv = 0.00011; DIFFERENCE  
Wilcoxon: Challenge; fasting: 0.875; sport: 0.875; OLTT: 0.125

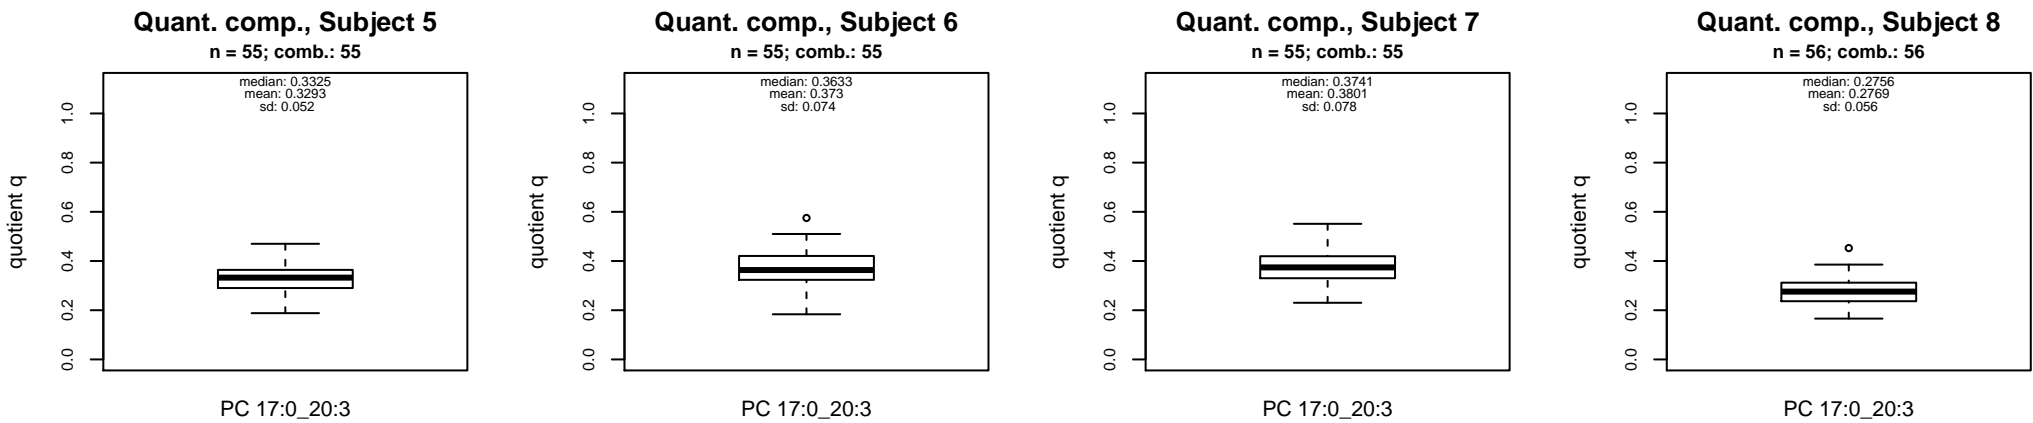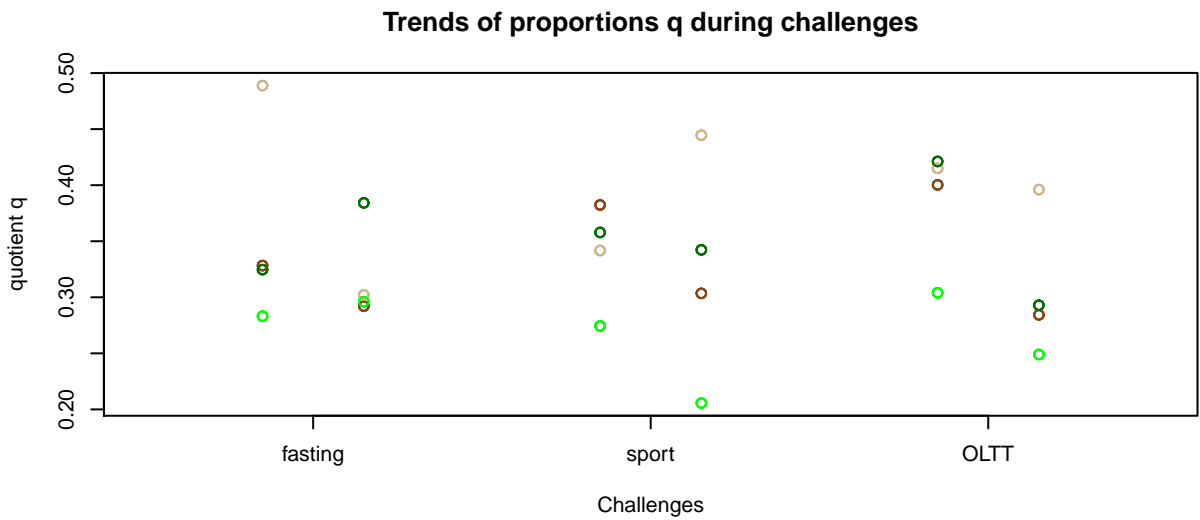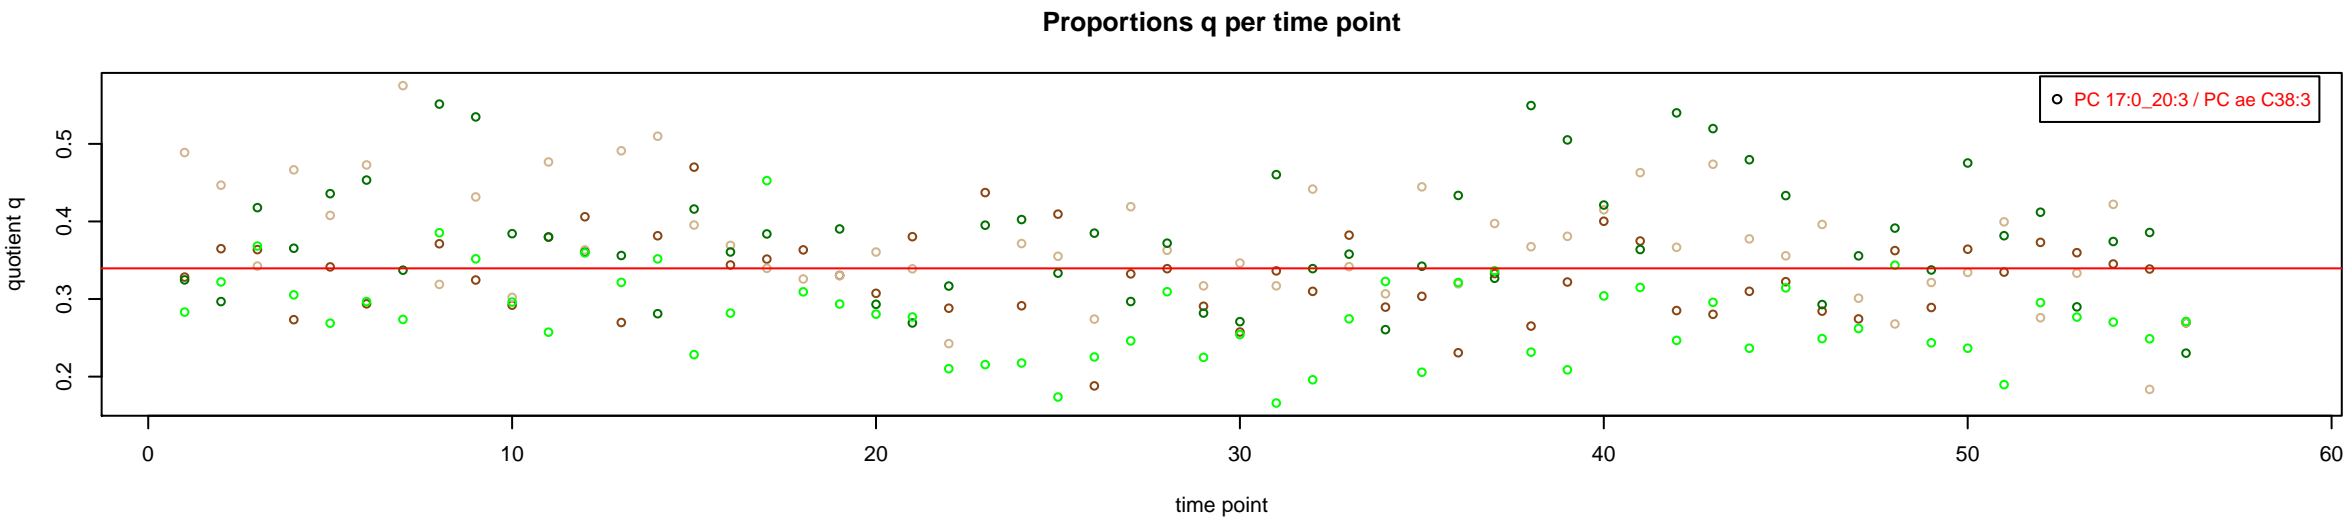

PC ae C38:4 = PC 17:0\_20:4 + R

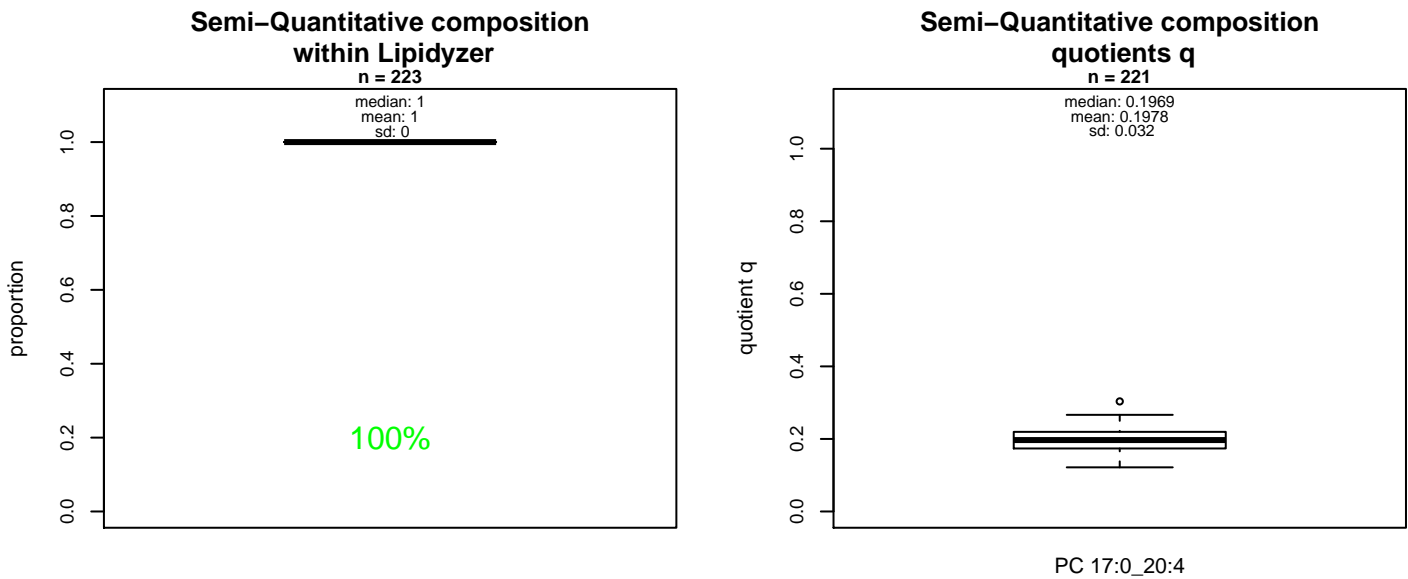

Semi-Quantitative composition: Lipidzyzer

PC ae C38:4 consists of:  
PC 17:0\_20:4 100%  
and of (not quantified):  
PC O-16:0\_22:4, PC O-18:0\_20:4, PC O-20:0\_18:4, PC O-  
PC O-18:2\_20:2, PC O-20:1\_18:3, PC 15:0\_22:4, PC 17:1\_2  
PC 18:4\_19:0  
and further compounds

Composition: mean of proportions q

conc(PC ae C38:4) \* 0.1978 = conc(PC 17:0\_20:4) [var(q)=0.1978]  
Percentiles: 5%→0.1495, 25%→0.1737, 75%→0.2195, 95%→0.2547

Linear model

$PC\ ae\ C38:4 \sim b * (PC\ 17:0_{20:4})$

b = 3.91691

R<sup>2</sup> = 0.64147

Ranges

| Measure | AbsoluteIDQ | sum(Lipidzyzer) | delta |
|---------|-------------|-----------------|-------|
| Min     | 6.25        | 1.05            | 5.2   |
| Max     | 21          | 4.38            | 16.62 |
| Mean    | 13.93       | 2.73            | 11.2  |
| Median  | 14.55       | 2.81            | 11.74 |
| SD      | 3.65        | 0.75            | 2.91  |

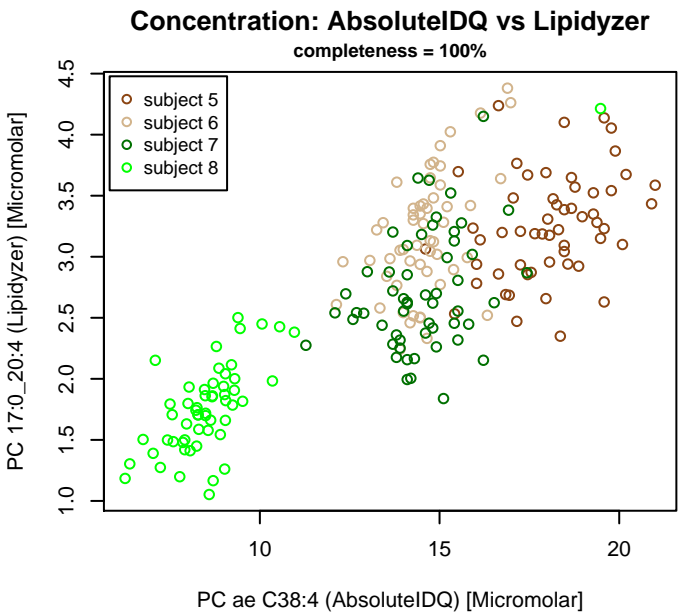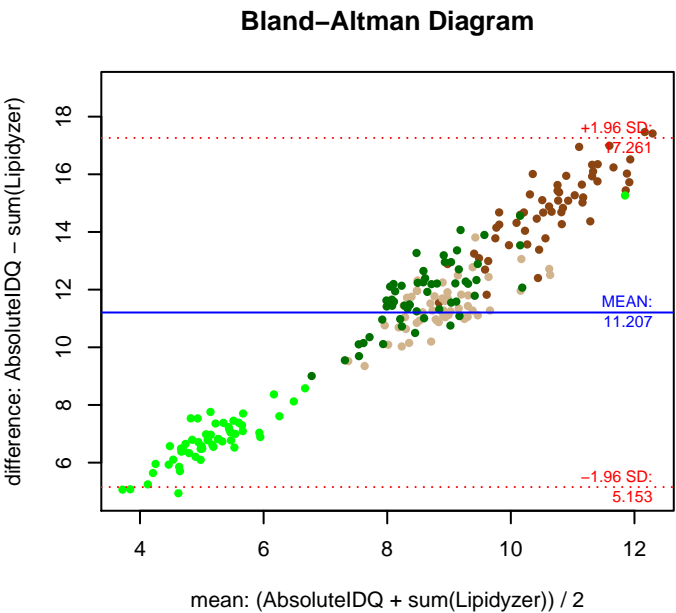

Stability of composition

PC 17:0\_20:4 / PC ae C38:4  
Shapiro-Wilk Test of log quotients, pv: 0.19617; OK  
SW: ok; ANOVA: Comp. ~ Subject\_ID -> pv = 0.01837; EQUAL  
Wilcoxon: Challenge; fasting: 0.875; sport: 0.375; OLTT: 0.125

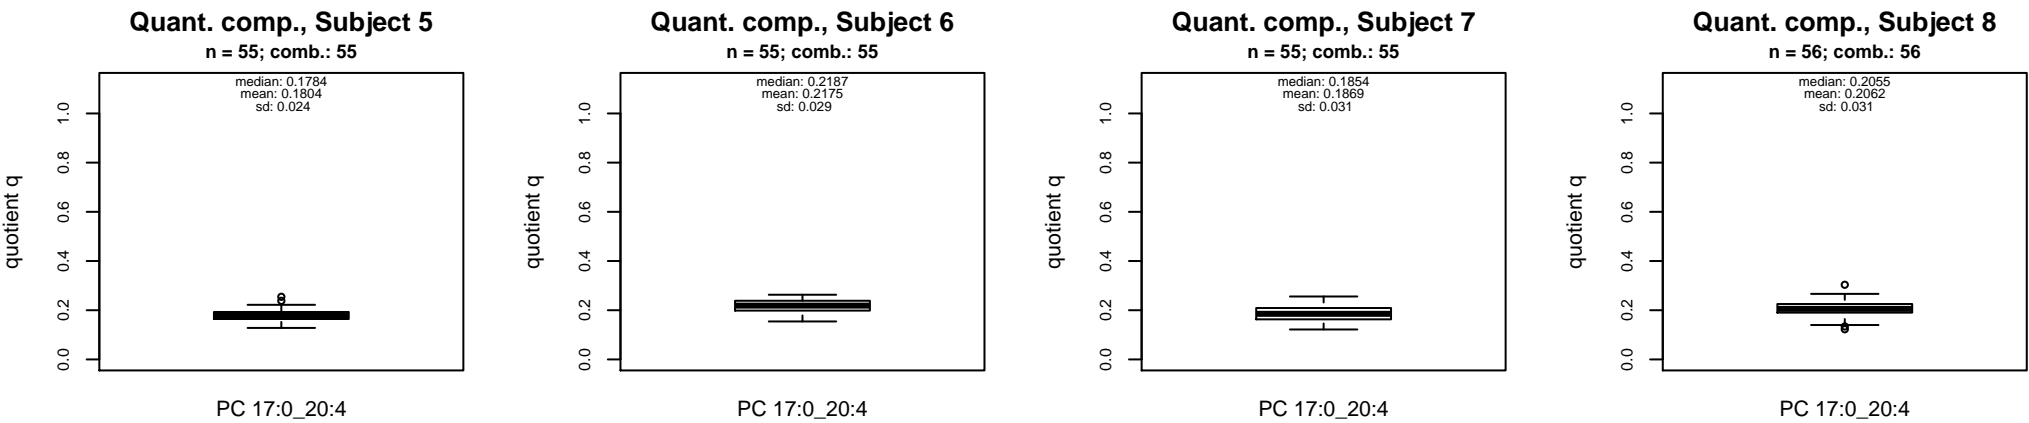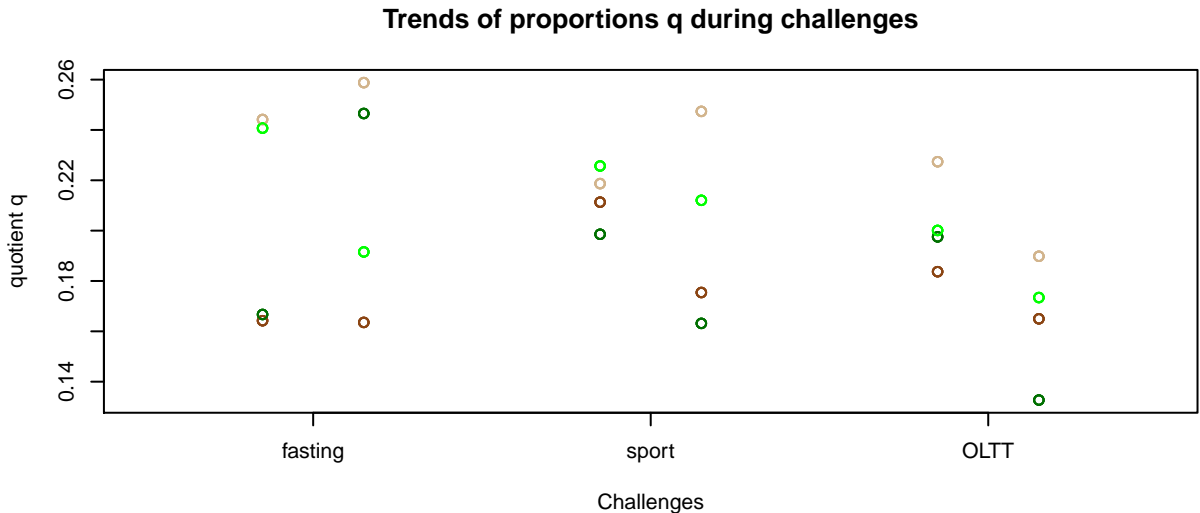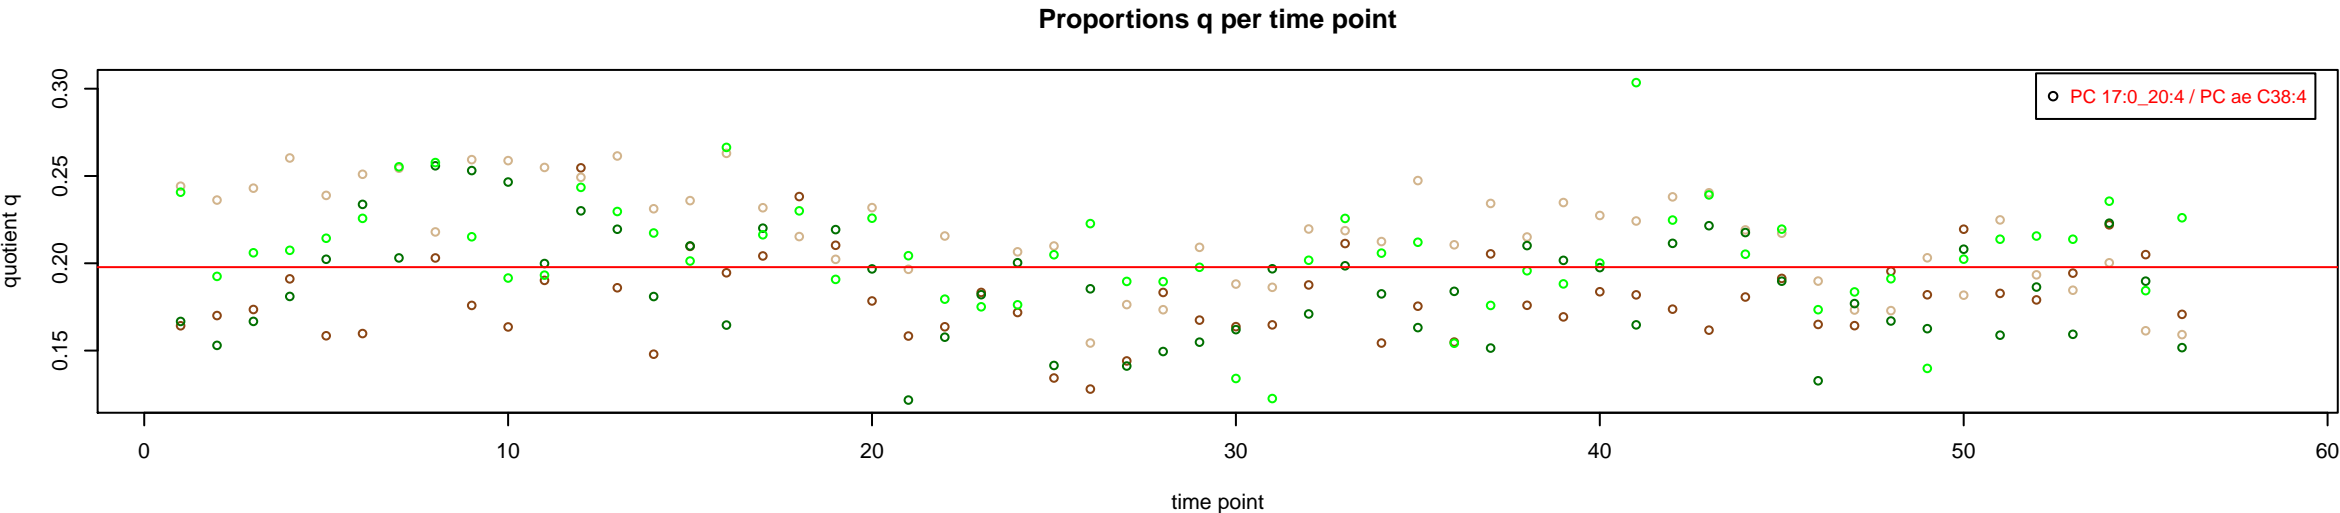

PC ae C38:5 = PC 15:0\_22:5 + PC 17:0\_20:5 + R

PC 15:0\_22:5 excluded because of missingness > 75%

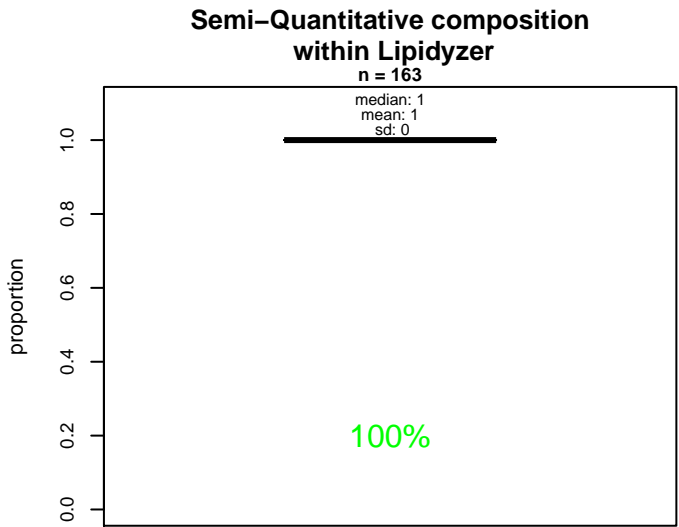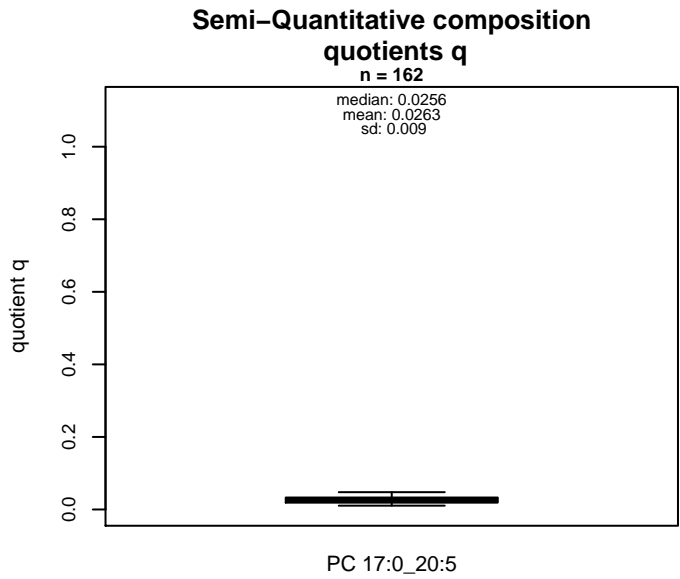

Semi-Quantitative composition: Lipidzyer

PC ae C38:5 consists of:  
PC 17:0\_20:5 100%  
and of (not quantified):  
PC 15:0\_22:5, PC O-16:0\_22:5, PC O-16:1\_22:4, PC O-18:  
PC O-18:1\_20:4, PC O-18:2\_20:3, PC O-18:4\_20:1, PC 15:  
PC 18:4\_19:1  
and further compounds

Composition: mean of proportions q

conc(PC ae C38:5) \* 0.0263 = conc(PC 17:0\_20:5) [var(q)=0.0263]  
Percentiles: 5%→0.0145, 25%→0.0191, 75%→0.0328, 95%→0.0408

Linear model

$$PC\ ae\ C38:5 \sim b * (PC\ 17:0_{20:5})$$

$$b = 3.44394$$

$$R^2 = 0.02174$$

Ranges

| Measure | AbsoluteIDQ | sum(Lipidzyer) | delta |
|---------|-------------|----------------|-------|
| Min     | 12.5        | 0.2            | 12.3  |
| Max     | 27.9        | 0.99           | 26.91 |
| Mean    | 19.34       | 0.5            | 18.84 |
| Median  | 19          | 0.5            | 18.5  |
| SD      | 3.67        | 0.15           | 3.52  |

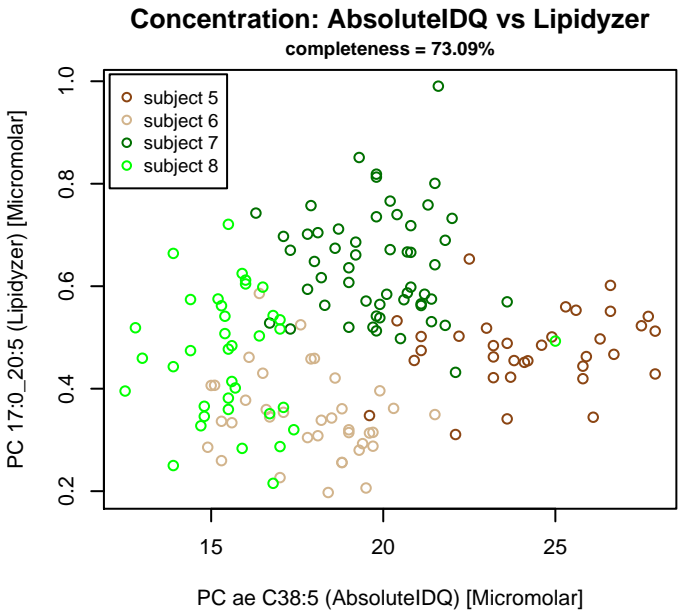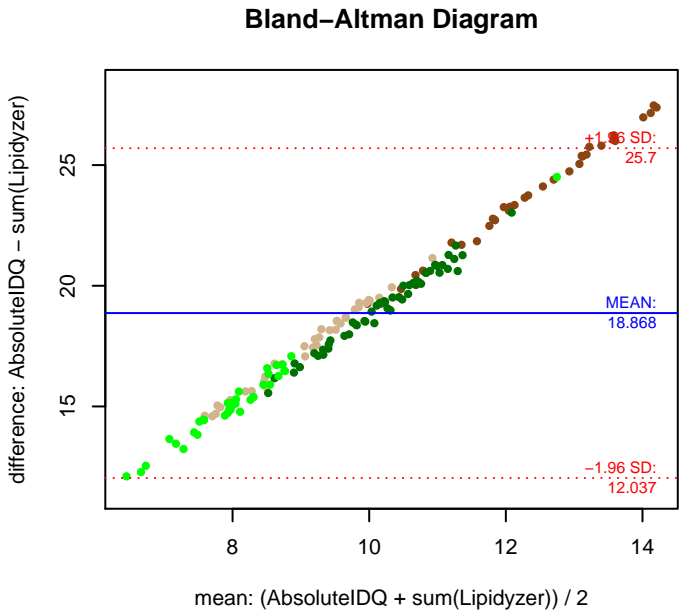

Stability of composition

PC 17:0\_20:5 / PC ae C38:5  
Shapiro-Wilk Test of log quotients, pv: 0.02234; OK  
SW: ok; ANOVA: Comp. ~ Subject\_ID -> pv = 0; DIFFERENCE  
Wilcoxon: Challenge; fasting: 0.5; sport: 0.875; OLTT: 0.125

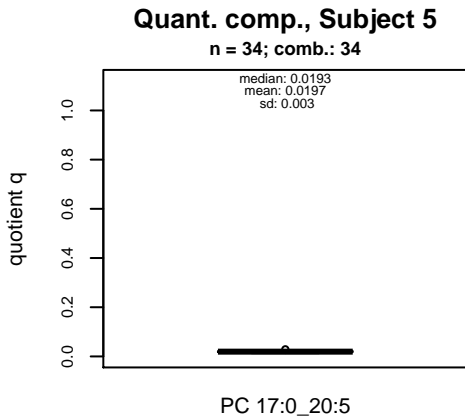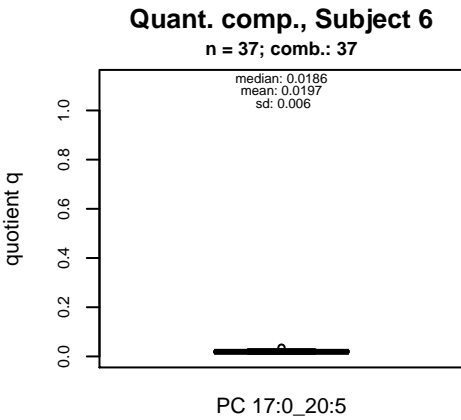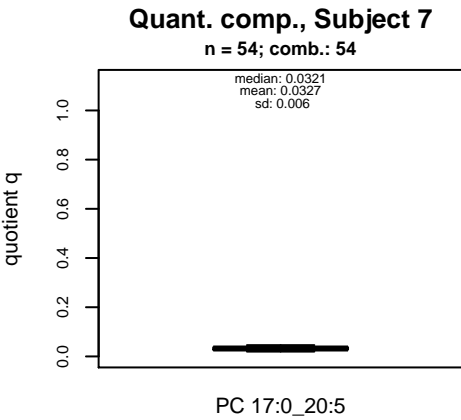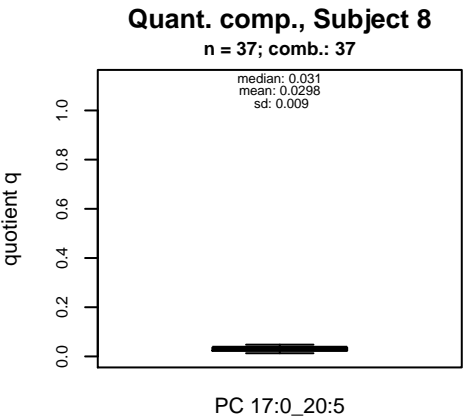

Trends of proportions q during challenges

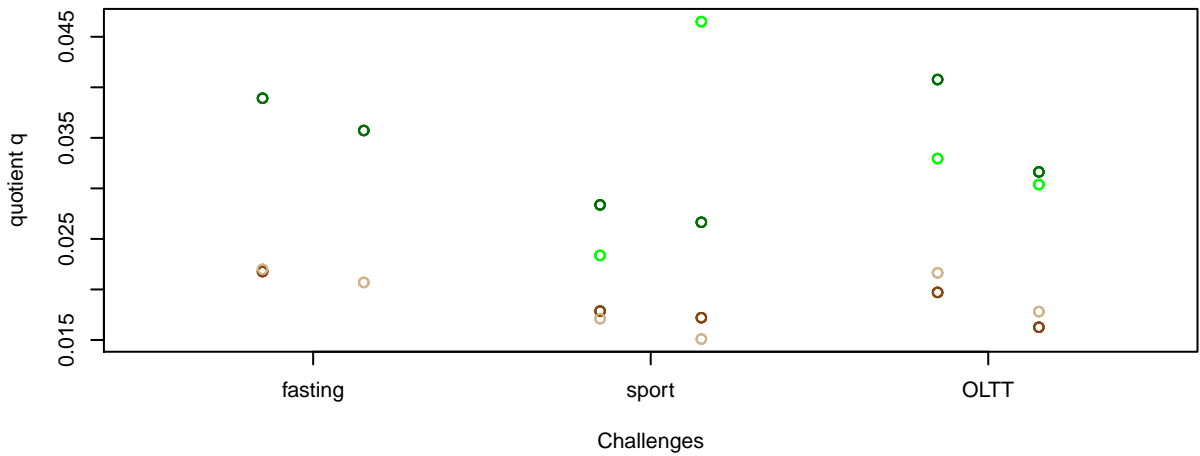

Proportions q per time point

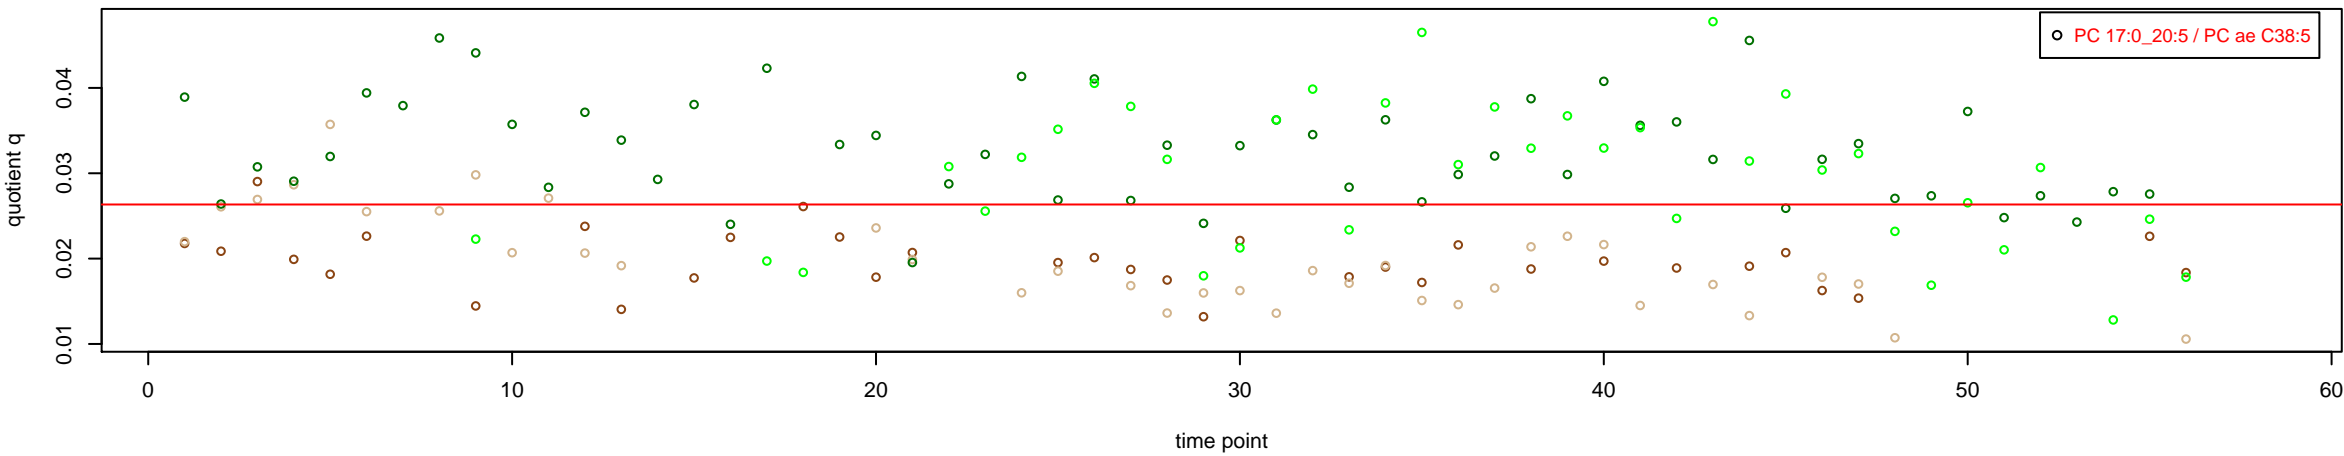



PC ae C38:6 = PC 15:0\_22:6 + R

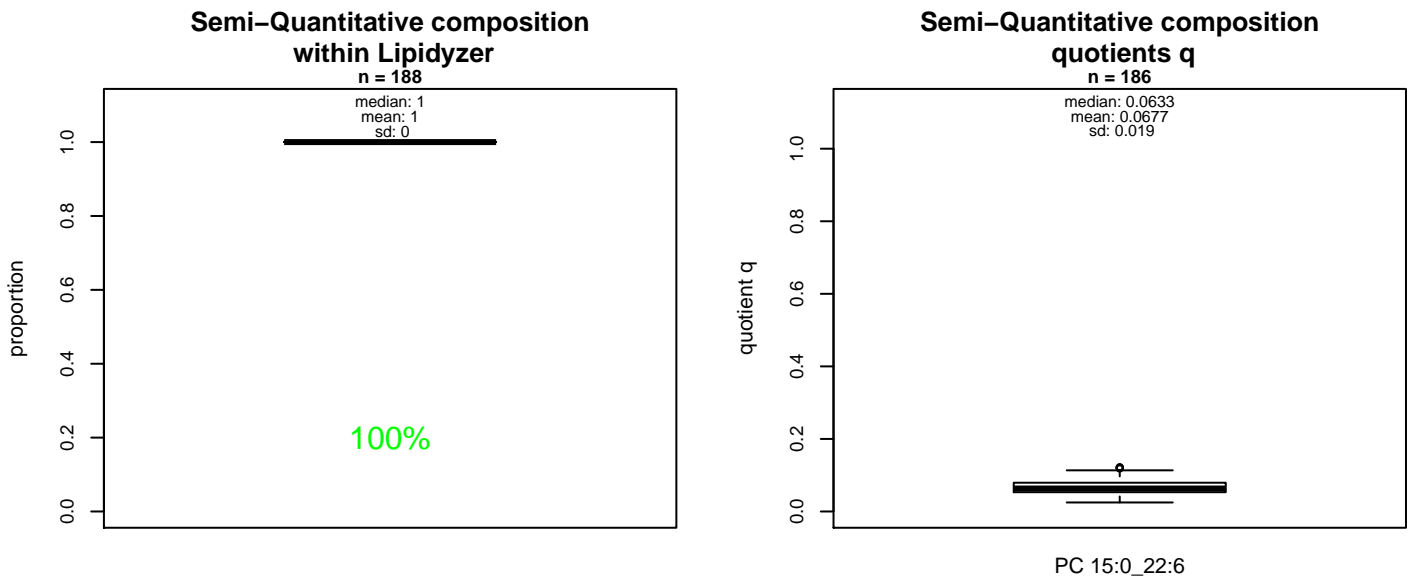

Semi-Quantitative composition: Lipidzyzer

PC ae C38:6 consists of:  
PC 15:0\_22:6 100%  
and of (not quantified):  
PC O-16:0\_22:6, PC O-18:1\_20:5, PC O-18:2\_20:5, PC 17:  
PC 17:2\_20:4  
and further compounds

Composition: mean of proportions q

conc(PC ae C38:6) \* 0.0677 = conc(PC 15:0\_22:6) [var(q)=0.0677]  
Percentiles: 5%→0.0433, 25%→0.0532, 75%→0.0786, 95%→0.1084

Linear model

$PC\ ae\ C38:6 \sim b * (PC\ 15:0_{22:6})$

b = 5.55836

R<sup>2</sup> = 0.12603

Ranges

| Measure | AbsoluteIDQ | sum(Lipidzyzer) | delta |
|---------|-------------|-----------------|-------|
| Min     | 5.29        | 0.17            | 5.12  |
| Max     | 12.77       | 0.96            | 11.81 |
| Mean    | 7.85        | 0.51            | 7.34  |
| Median  | 7.32        | 0.51            | 6.81  |
| SD      | 1.87        | 0.12            | 1.75  |

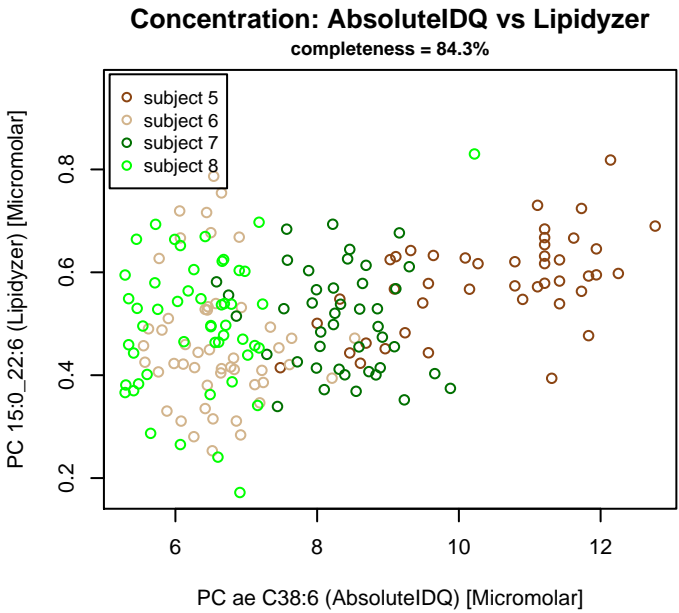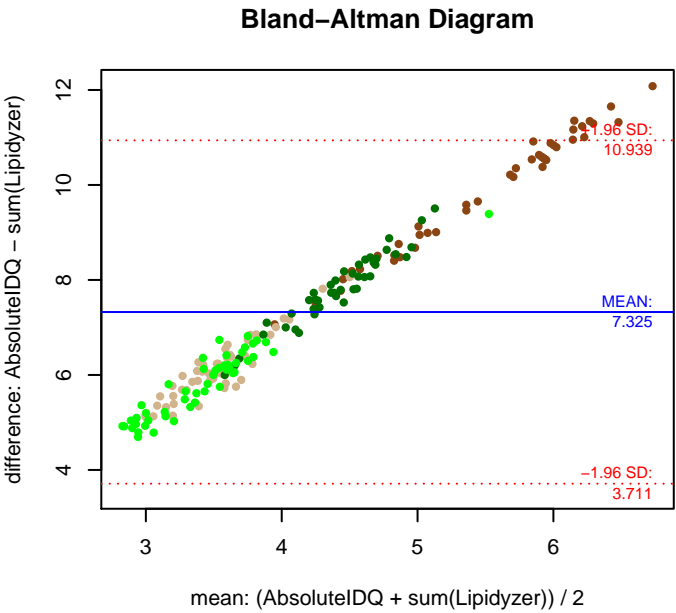

Stability of composition

PC 15:0\_22:6 / PC ae C38:6  
Shapiro-Wilk Test of log quotients, pv: 0.22571; OK  
SW: no; Kruskal: Comp. ~ Subject\_ID → pv = 0; DIFFERENCE  
Wilcoxon: Challenge; fasting: 0.75; sport: 0.625; OLTT: 0.5

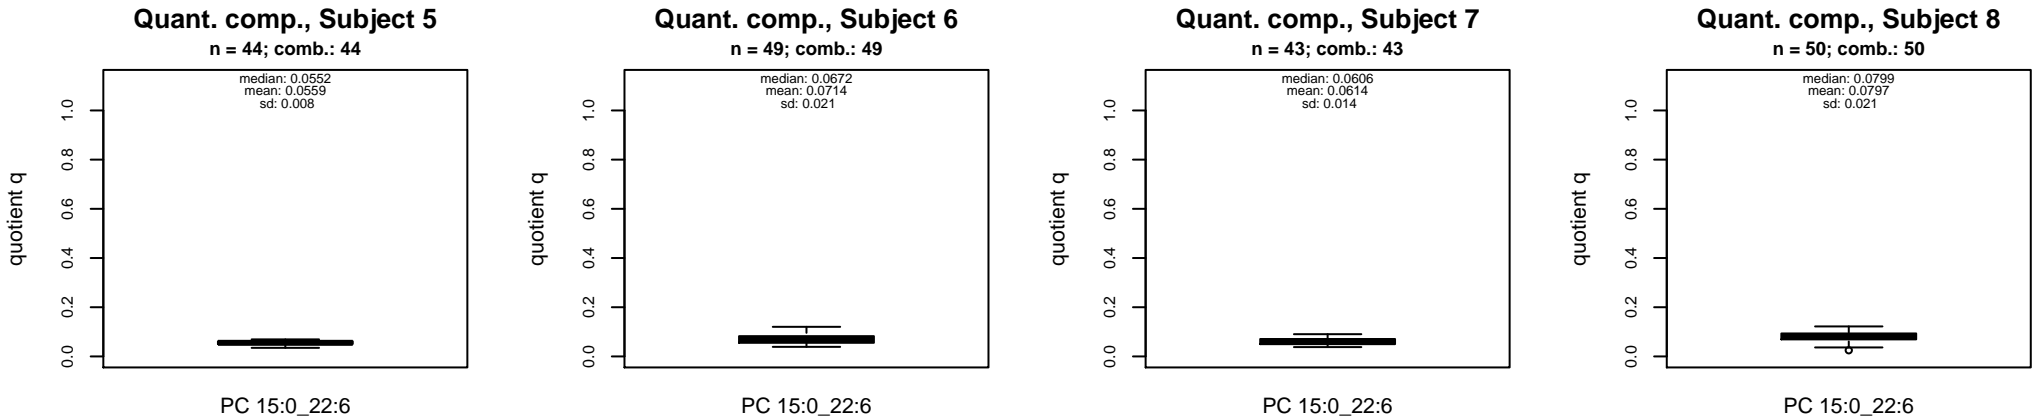

Trends of proportions q during challenges

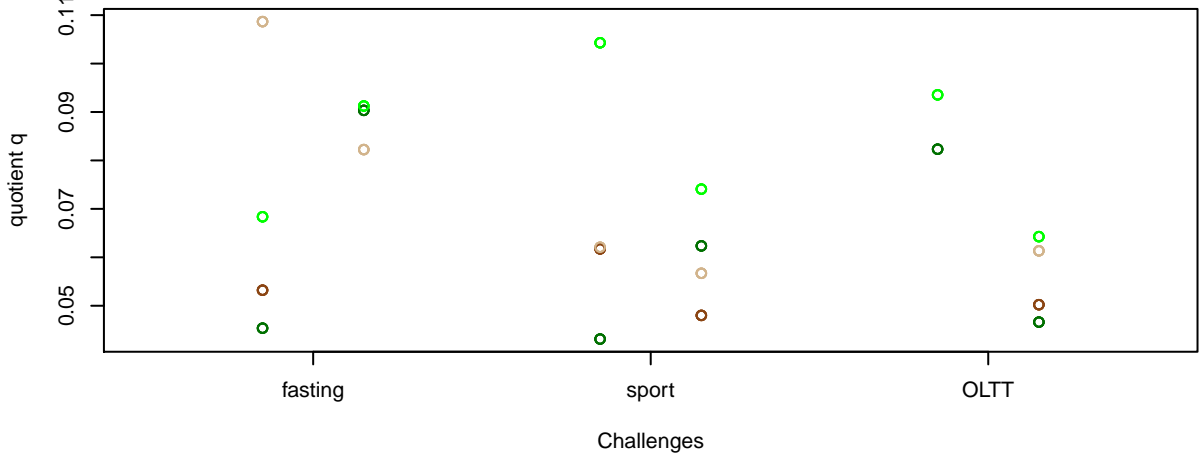

Proportions q per time point

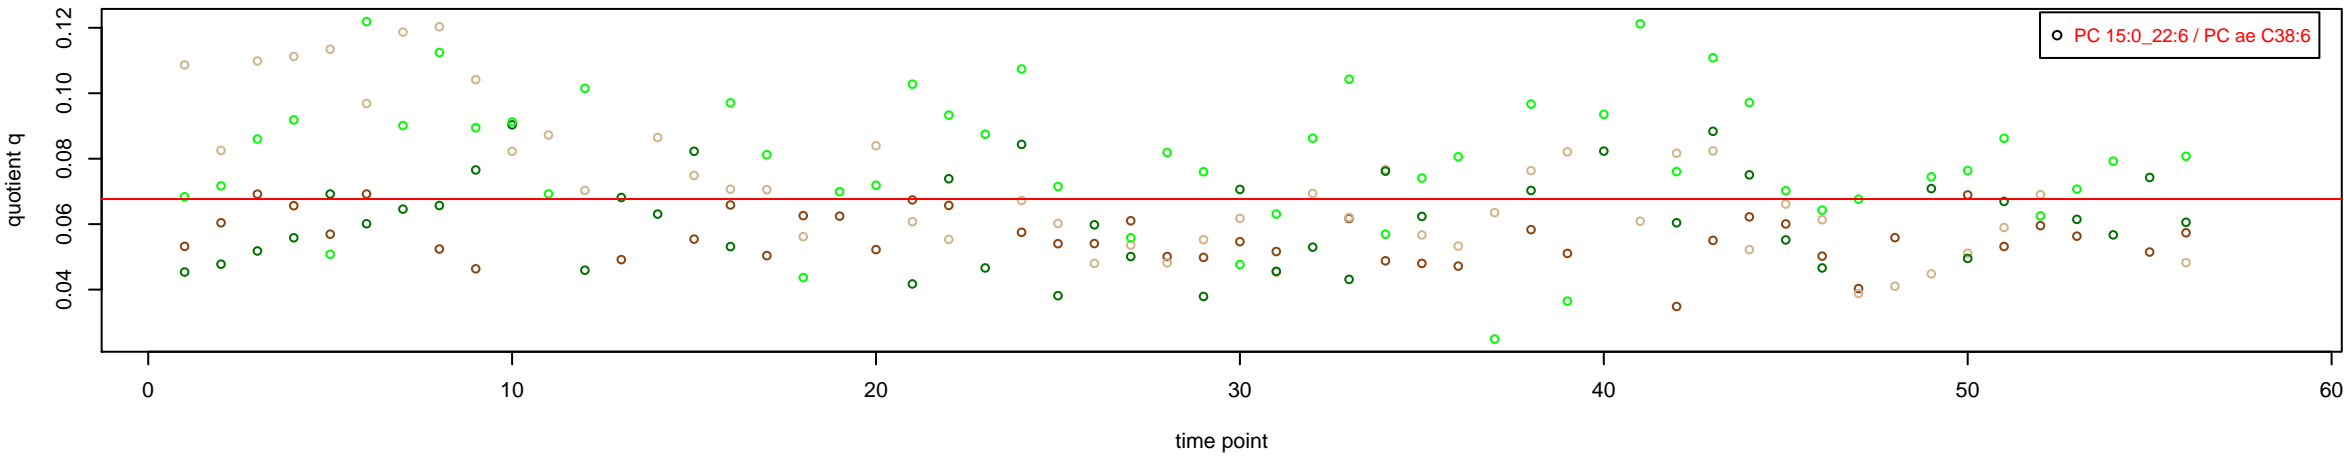

PC ae C40:1 = PC 18:2\_22:6 + R

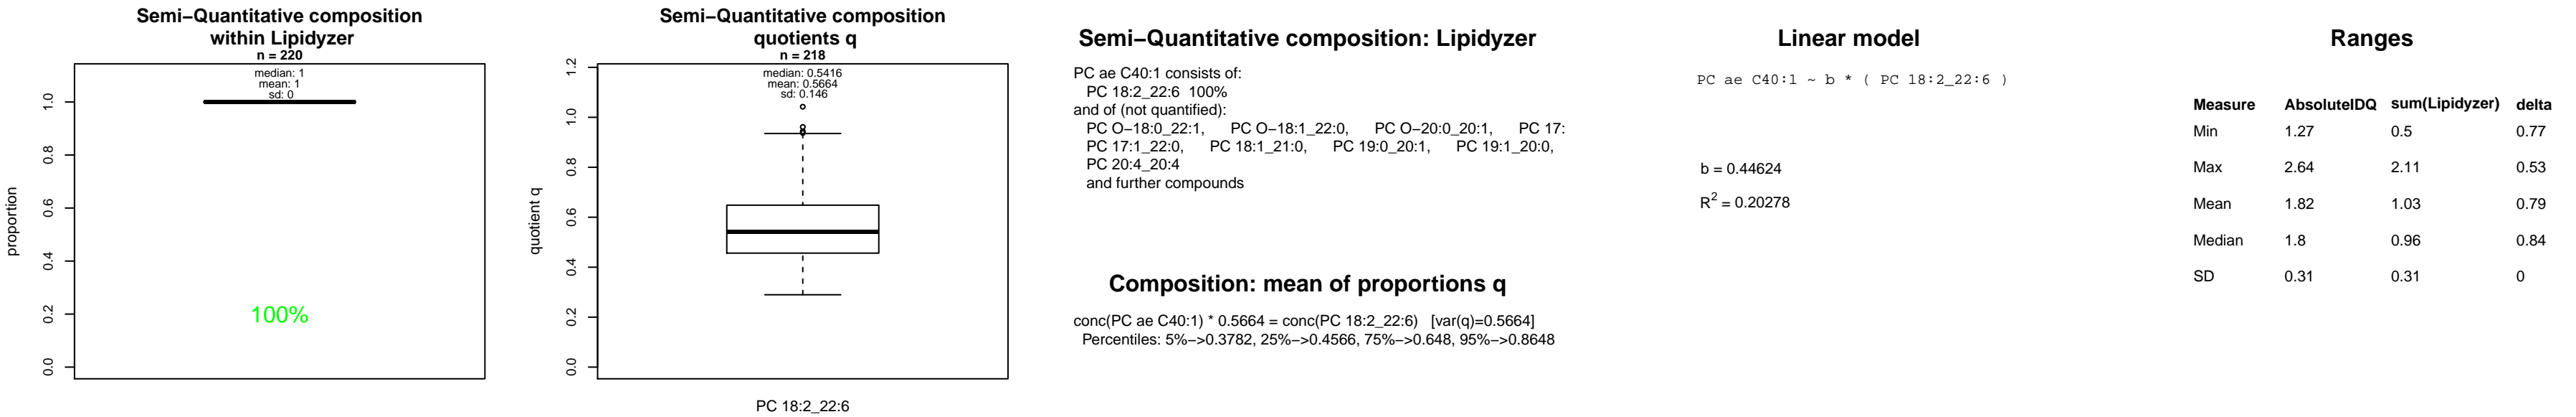

PC ae C40:2 = R

Qualitative composition

PC ae C40:2 consists of:  
PC O-18:0\_22:2, PC O-18:1\_22:1, PC O-18:2\_22:0, PC O-18:3\_22:0,  
PC O-20:1\_20:1, PC 17:0\_22:2, PC 17:1\_22:1, PC 17:2\_22:0,  
PC 18:2\_21:0, PC 19:0\_20:2, PC 19:1\_20:1, PC 18:3\_22:6,  
[13C1]SM 43:2  
and further compounds

No independent Variable measured.

PC ae C40:3 = R

Qualitative composition

PC ae C40:3 consists of:  
PC O-18:1\_22:2, PC O-18:2\_22:1, PC O-20:0\_20:3, PC O-20:1\_20:3,  
PC O-22:0\_18:3, PC 17:1\_22:2, PC 17:2\_22:1, PC 18:3\_21:0,  
PC 19:0\_20:3, PC 19:1\_20:2, PC 18:4\_22:6, PC 20:5\_20:5,  
and further compounds

No independent Variable measured.

PC ae C40:4 = R

Qualitative composition

PC ae C40:4 consists of:  
PC O-18:0\_22:4,    PC O-18:2\_22:2,    PC O-20:0\_20:4,    PC O-  
PC 17:0\_22:4,    PC 17:2\_22:2,    PC 18:4\_21:0,    PC 19:0\_20:4,  
PC 19:1\_20:3  
and further compounds

No independent Variable measured.

PC ae C40:5 = PC 17:0\_22:5 + R

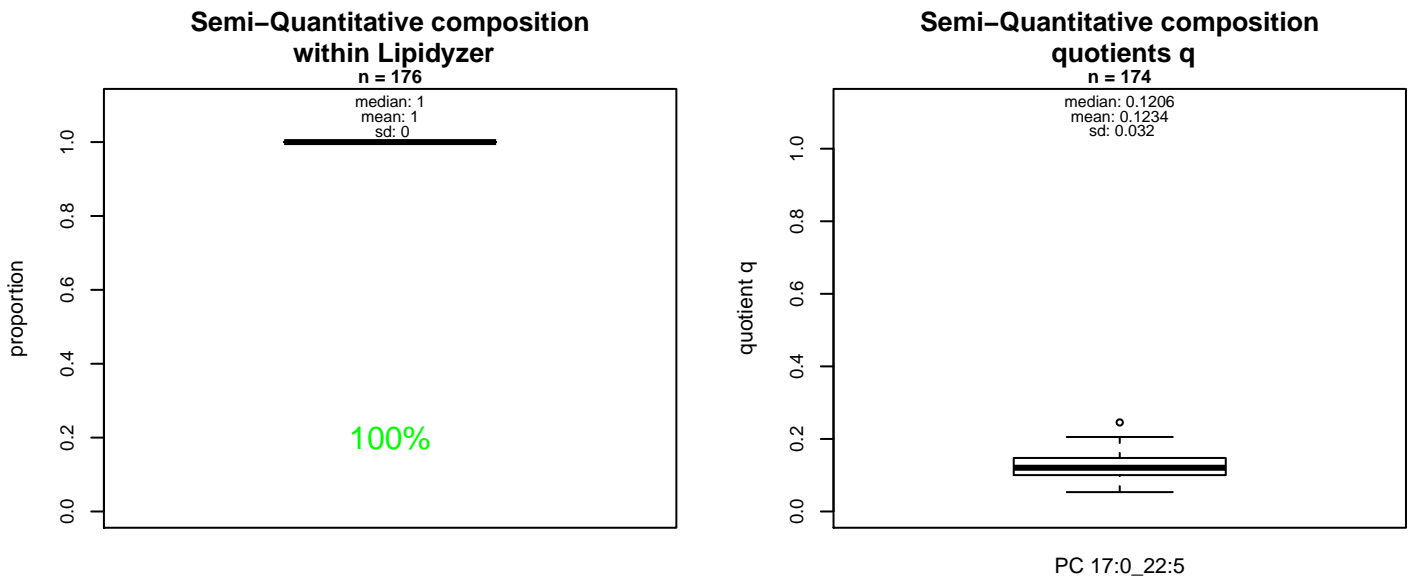

Semi-Quantitative composition: Lipidzyzer

PC ae C40:5 consists of:  
PC 17:0\_22:5 100%  
and of (not quantified):  
PC O-18:0\_22:5, PC O-18:1\_22:4, PC O-20:0\_20:5, PC O-  
PC 16:0\_23:5, PC 17:1\_22:4, PC 19:0\_20:5, PC 19:1\_20:4,  
and further compounds

Composition: mean of proportions q

conc(PC ae C40:5) \* 0.1234 = conc(PC 17:0\_22:5) [var(q)=0.1234]  
Percentiles: 5%→0.0708, 25%→0.1003, 75%→0.1471, 95%→0.1735

Linear model

$PC\ ae\ C40:5 \sim b * (PC\ 17:0_{22:5})$

b = 2.47007

R<sup>2</sup> = 0.19655

Ranges

| Measure | AbsoluteIDQ | sum(Lipidzyzer) | delta |
|---------|-------------|-----------------|-------|
| Min     | 2.22        | 0.15            | 2.07  |
| Max     | 5.64        | 0.85            | 4.79  |
| Mean    | 3.66        | 0.45            | 3.22  |
| Median  | 3.53        | 0.44            | 3.09  |
| SD      | 0.73        | 0.13            | 0.6   |

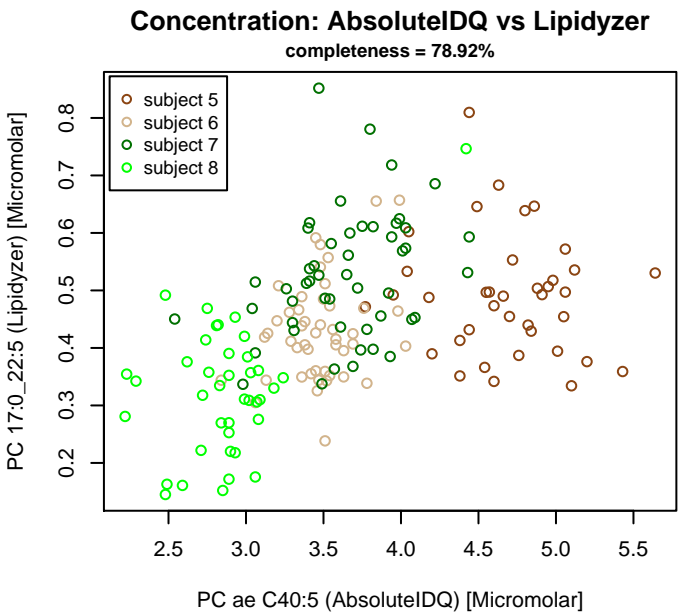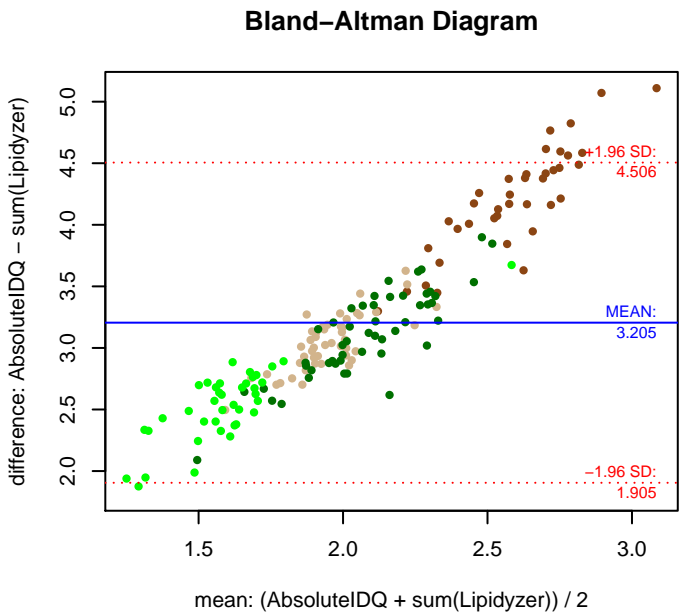

Stability of composition

PC 17:0\_22:5 / PC ae C40:5  
Shapiro-Wilk Test of log quotients, pv: 0.00815; NO  
SW: ok; ANOVA: Comp. ~ Subject\_ID -> pv = 0.09316; EQUAL  
Wilcoxon: Challenge; fasting: 1; sport: 0.375; OLTT: 0.5

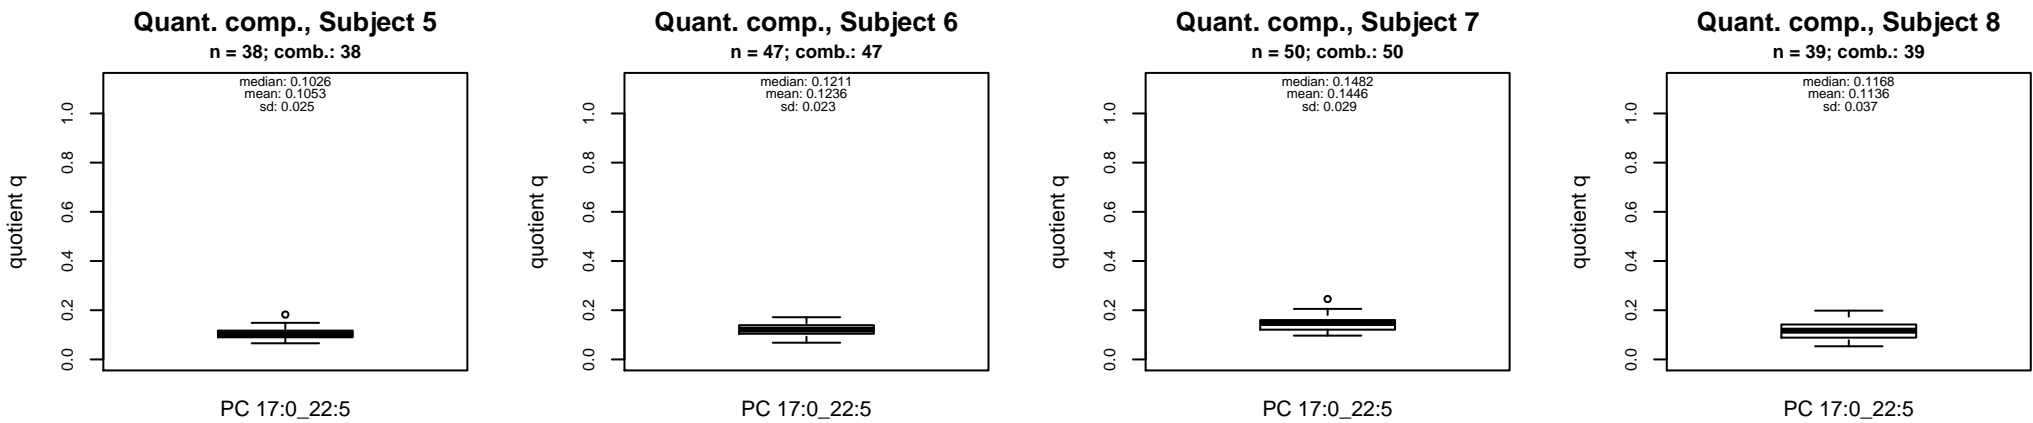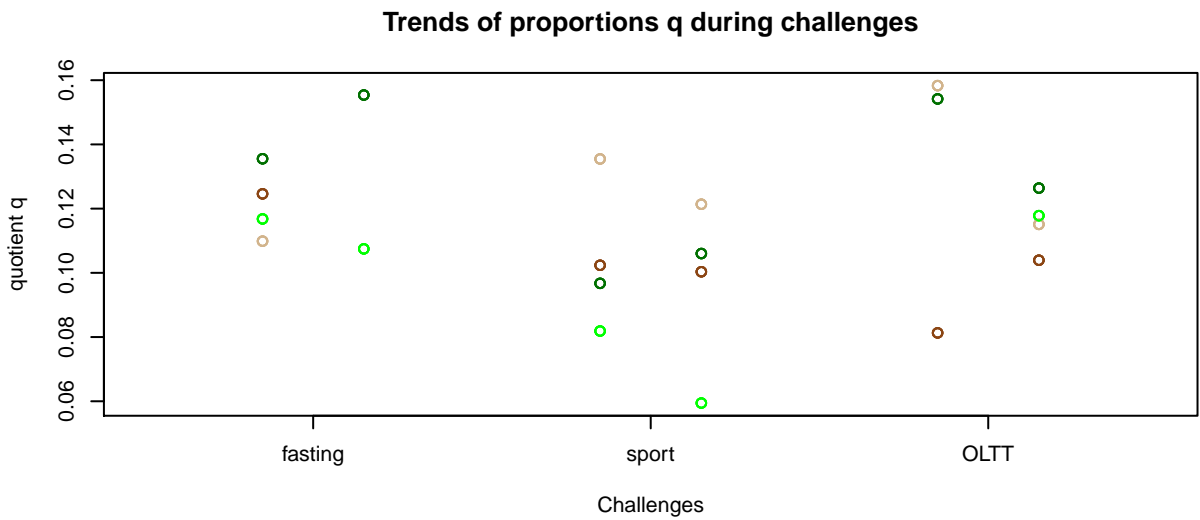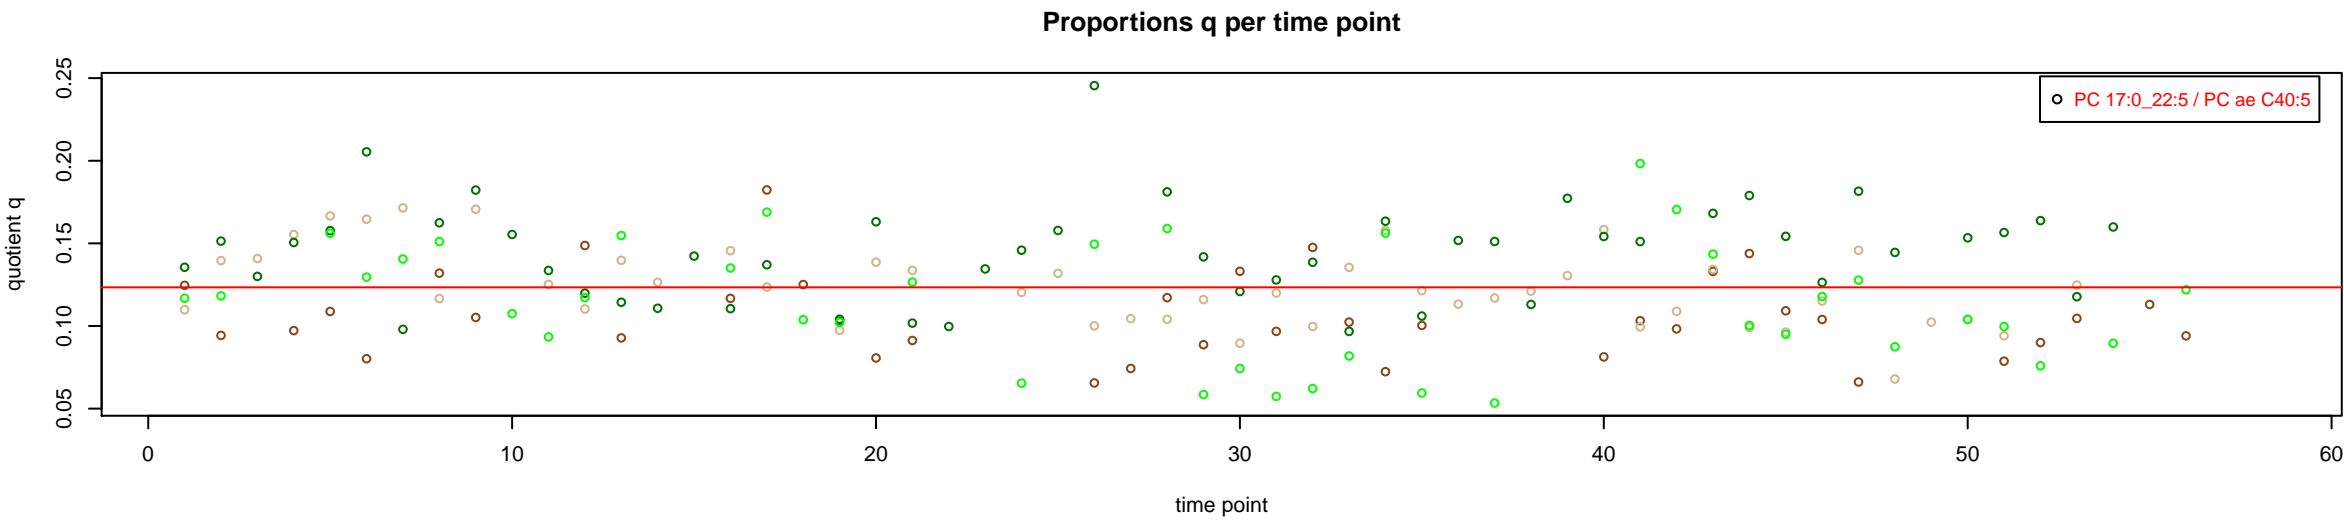



PC ae C40:6 = PC 17:0\_22:6 + R

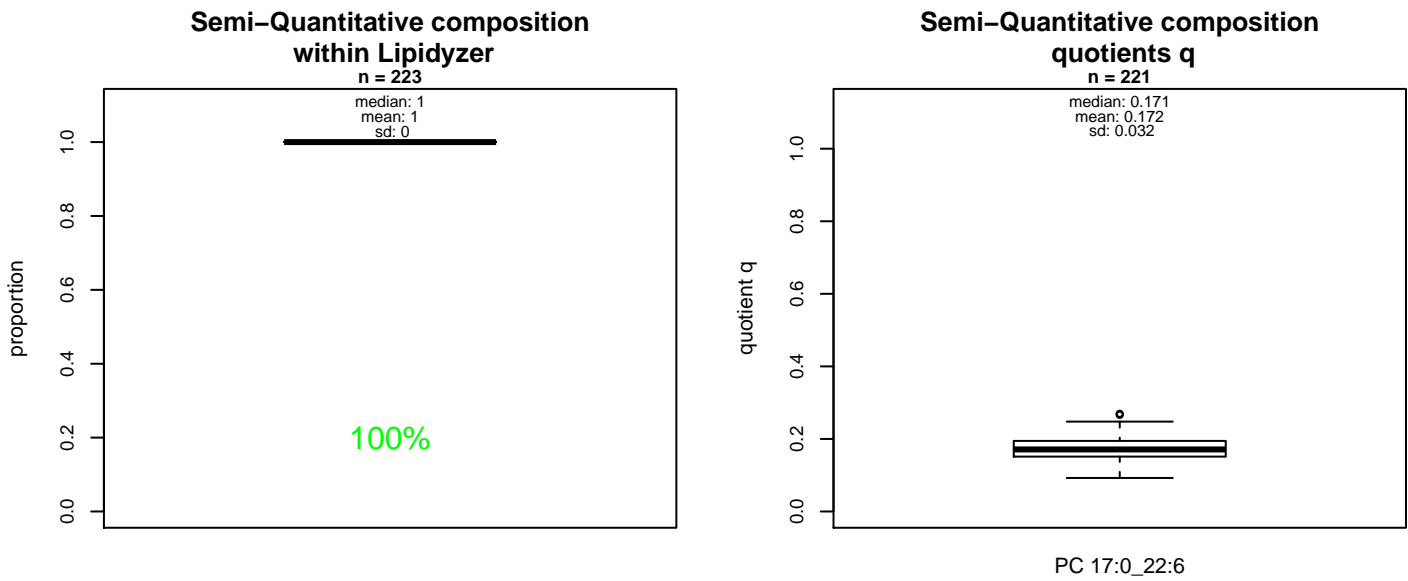

Semi-Quantitative composition: Lipidzyzer

PC ae C40:6 consists of:  
PC 17:0\_22:6 100%  
and of (not quantified):  
PC O-18:0\_22:6, PC O-18:2\_22:4, PC O-20:1\_20:5, PC 17:  
PC 19:1\_20:5  
and further compounds

Composition: mean of proportions q

conc(PC ae C40:6) \* 0.172 = conc(PC 17:0\_22:6) [var(q)=0.172]  
Percentiles: 5%→0.1216, 25%→0.1513, 75%→0.1945, 95%→0.2262

Linear model

$PC\ ae\ C40:6 \sim b * (PC\ 17:0_{22:6})$

b = 3.28445

R<sup>2</sup> = 0.56301

Ranges

| Measure | AbsoluteIDQ | sum(Lipidzyzer) | delta |
|---------|-------------|-----------------|-------|
| Min     | 3.54        | 0.43            | 3.11  |
| Max     | 8.53        | 1.63            | 6.9   |
| Mean    | 5.34        | 0.92            | 4.42  |
| Median  | 5.01        | 0.87            | 4.14  |
| SD      | 1.12        | 0.26            | 0.86  |

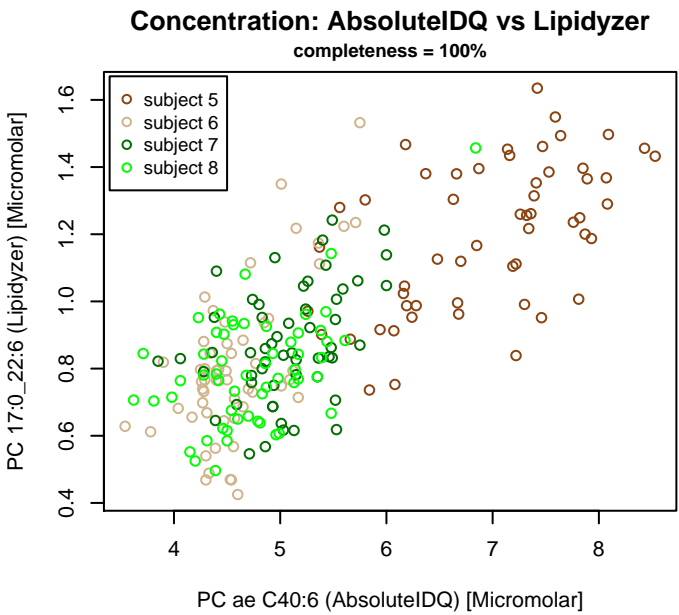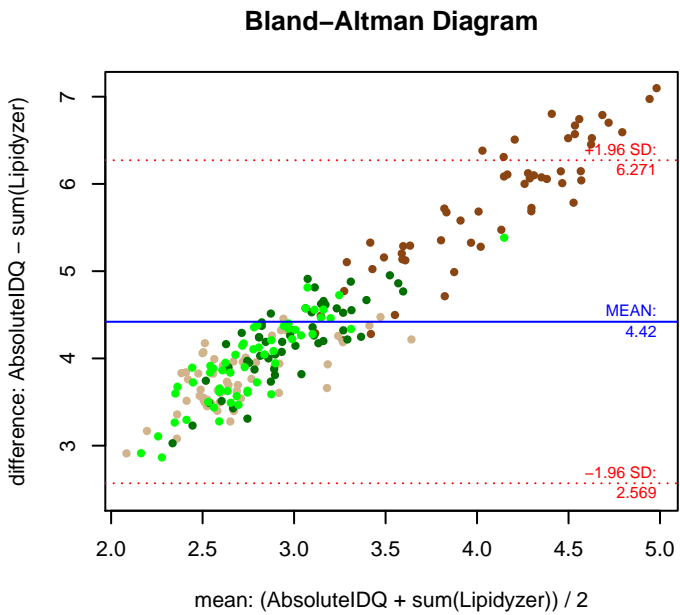

Stability of composition

PC 17:0\_22:6 / PC ae C40:6  
Shapiro-Wilk Test of log quotients, pv: 0.15729; OK  
SW: ok; ANOVA: Comp. ~ Subject\_ID -> pv = 0.41419; EQUAL  
Wilcoxon: Challenge; fasting: 0.875; sport: 0.625; OLT: 0.25

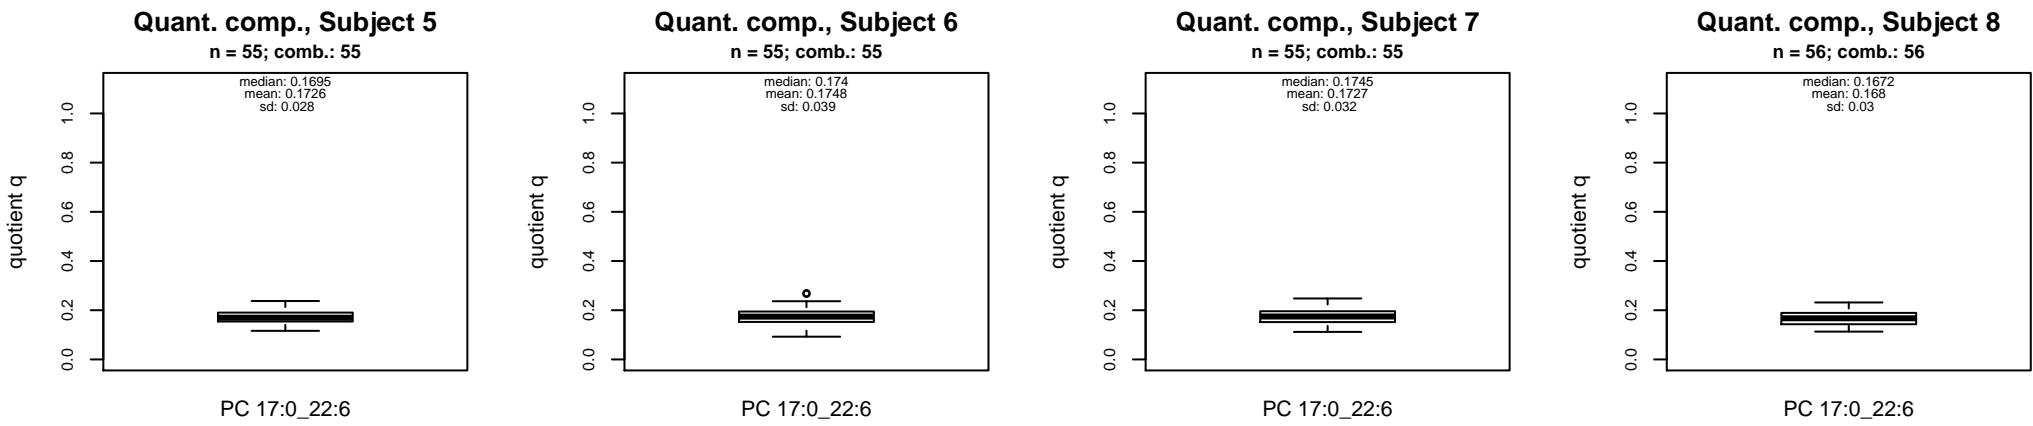

Trends of proportions q during challenges

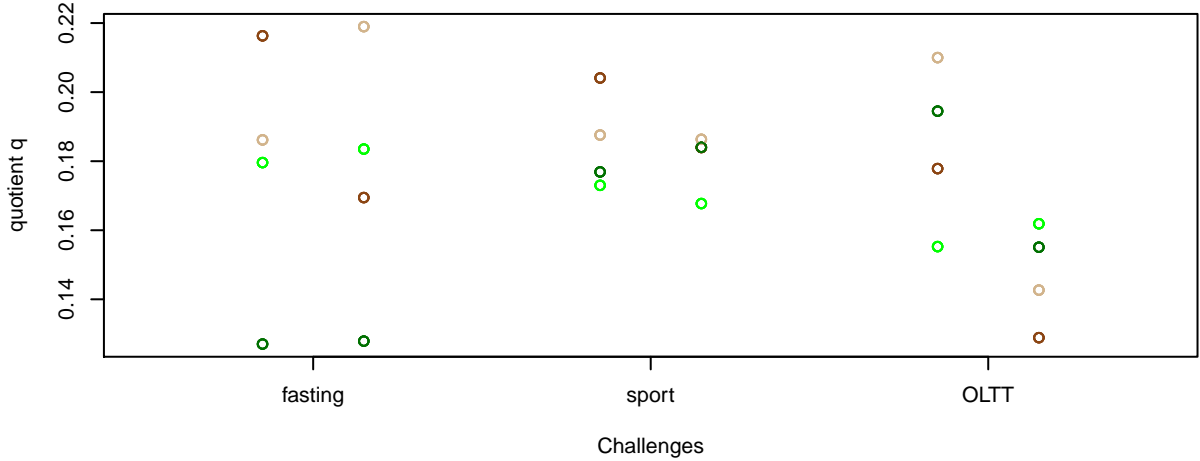

Proportions q per time point

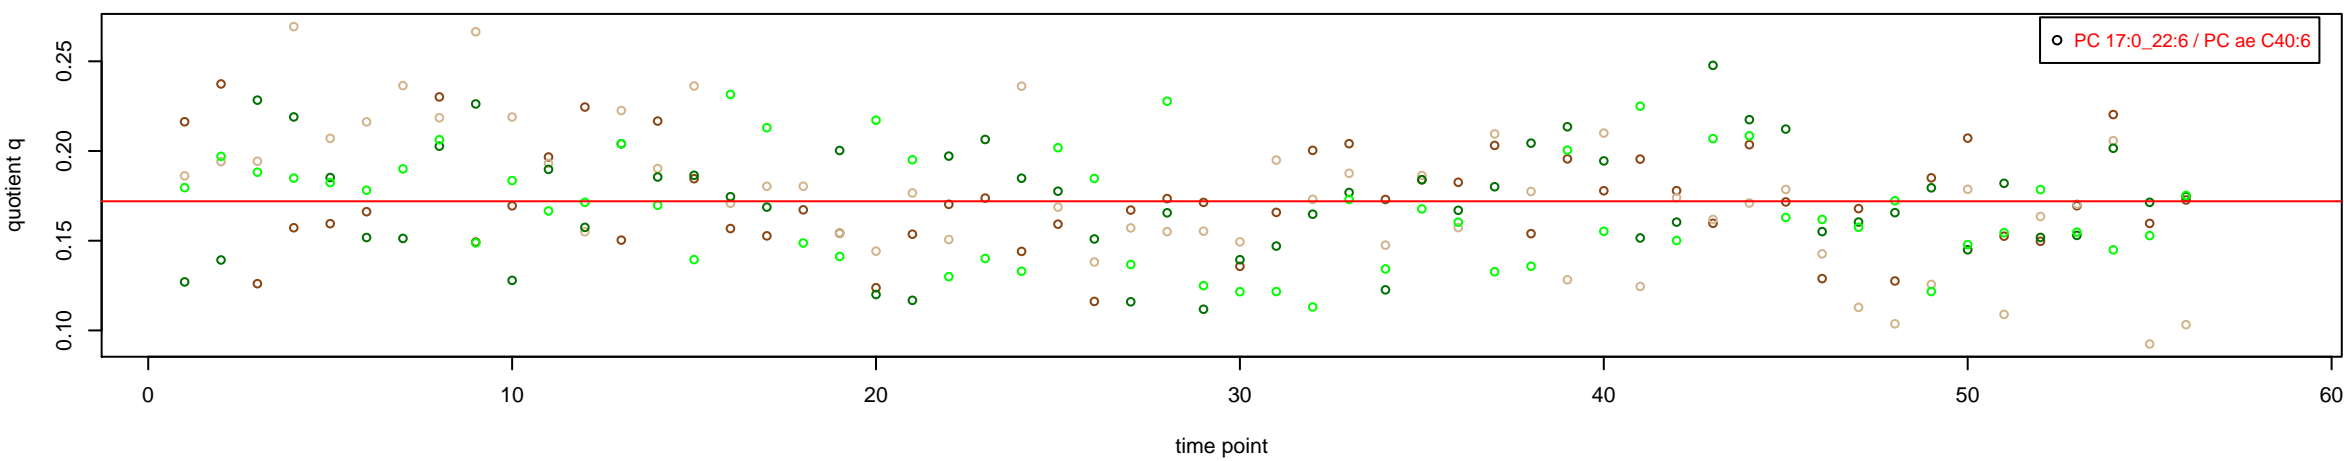

PC ae C42:0 = R

Qualitative composition

PC ae C42:0 consists of:  
PC O-20:0\_22:0,    PC 19:0\_22:0,    PC 20:0\_21:0,    PC 23:0\_18:0  
PC 20:5\_22:2  
and further compounds

No independent Variable measured.

PC ae C42:1 = R

Qualitative composition

PC ae C42:1 consists of:  
PC O-20:0\_22:1,    PC O-18:1\_24:0,    PC O-20:1\_22:0,    PC 19:  
PC 19:1\_22:0,    PC 20:1\_21:0,    PC 20:2\_22:6,    PC 20:4\_22:4,  
and further compounds

No independent Variable measured.

PC ae C42:2 = R

Qualitative composition

PC ae C42:2 consists of:  
PC O-20:0\_22:2,    PC O-18:2\_24:0,    PC O-20:1\_22:1,    PC O-  
PC 19:0\_22:2,    PC 19:1\_22:1,    PC 20:2\_21:0,    PC 20:3\_22:6,  
PC 20:5\_22:4  
and further compounds

No independent Variable measured.

PC ae C42:3 = R

Qualitative composition

PC ae C42:3 consists of:  
PC O-24:0\_18:3,    PC O-20:1\_22:2,    PC O-18:2\_24:1,    PC 21:  
PC 19:1\_22:2,    PC 20:3\_21:0,    PC 20:5\_22:5,    PC 20:4\_22:6,  
and further compounds

No independent Variable measured.

PC ae C42:4 = R

Qualitative composition

PC ae C42:4 consists of:  
PC O-20:0\_22:4,    PC 19:0\_22:4,    PC 20:4\_21:0,    PC 20:5\_22:4  
and further compounds

No independent Variable measured.



PC ae C42:5 = R

Qualitative composition

PC ae C42:5 consists of:  
PC 20:5\_21:0  
and further compounds

No independent Variable measured.

PC ae C44:3 = R

Qualitative composition

PC ae C44:3 consists of:  
PC 22:4\_22:6  
and further compounds

No independent Variable measured.

PC ae C44:4 = R

Qualitative composition

PC ae C44:4 consists of:  
PC O-24:0\_20:4,    PC O-22:1\_22:3,    PC O-22:2\_22:2,    PC 21:  
and further compounds

No independent Variable measured.

PC ae C44:5 = R

Qualitative composition

PC ae C44:5 consists of:  
PC 22:6\_22:6  
and further compounds

No independent Variable measured.

PC ae C44:6 = R

Qualitative composition

PC ae C44:6 consists of:  
PC 21:0\_22:6  
and further compounds

No independent Variable measured.
